# Supplementary material for: N-GlycositeAtlas: a database resource for mass spectrometry-based human N-linked glycoprotein and glycosylation site mapping
Source: Clin Proteomics. 2019 Sep 7;16:35. doi: 10.1186/s12014-019-9254-0 (PMC6731604; doi:10.1186/s12014-019-9254-0)
Supplement: Supplementary file 1 — Additional file 1: Table S1. The mass spectrometry-based human glycoprotein and glycosite database. [file 12014_2019_9254_MOESM1_ESM.xlsx]

## Sheet: Glycosite and glycoprotein DB
					Table S1. The mass spectrometry-based human glycoprotein and glycosite database
Database	Accession (UniProtKB)	Gene names	Protein names	Glycosylation location	Glycosite-containing peptides	Glycosite_±20 AAs	Identification resources	Years	References
Reviewed	A0A075B759	PPIAL4E	Peptidyl-prolyl cis-trans isomerase A-like 4E	108	SMANAGPNTnGSQF	LIRKHTGSGILSMANAGPNTNGSQFFICAAKTEWLDGKHVA	Liver	2014	33
Reviewed	A0A075B759	PPIAL4E	Peptidyl-prolyl cis-trans isomerase A-like 4E	108	SMANAGPNTnGSQFF	LIRKHTGSGILSMANAGPNTNGSQFFICAAKTEWLDGKHVA	Liver	2014	33
Reviewed	A0A075B759	PPIAL4E	Peptidyl-prolyl cis-trans isomerase A-like 4E	108	KHTGSGILSMANAGPNTnGSQF	LIRKHTGSGILSMANAGPNTNGSQFFICAAKTEWLDGKHVA	Serum;Prostate tumor;Breast tumor	2007;2007;2007	Unpublished;Unpublished;Unpublished
Reviewed	A0A0B4J2A2	PPIAL4C	Peptidyl-prolyl cis-trans isomerase A-like 4C	108	nGSQFFICTA	LIRKHTGSGILSMANAGPNTNGSQFFICTAKTEWLDGKHVA	OVCAR-3 cell line (Ovarian cancer)	2015	1
Reviewed	A0A0B4J2A2	PPIAL4C	Peptidyl-prolyl cis-trans isomerase A-like 4C	108	nGSQFFLCTAK	LIRKHTGSGILSMANAGPNTNGSQFFICTAKTEWLDGKHVA	OVCAR-3 cell line (Ovarian cancer)	2015	1
Reviewed	A0A0B4J2A2	PPIAL4C	Peptidyl-prolyl cis-trans isomerase A-like 4C	108	SMANAGPNTnGSQF	LIRKHTGSGILSMANAGPNTNGSQFFICTAKTEWLDGKHVA	Liver	2014	33
Reviewed	A0A0B4J2A2	PPIAL4C	Peptidyl-prolyl cis-trans isomerase A-like 4C	108	SMANAGPNTnGSQFF	LIRKHTGSGILSMANAGPNTNGSQFFICTAKTEWLDGKHVA	Liver	2014	33
Reviewed	A0A0B4J2A2	PPIAL4C	Peptidyl-prolyl cis-trans isomerase A-like 4C	108	AGPNTnGSQFFICTAK	LIRKHTGSGILSMANAGPNTNGSQFFICTAKTEWLDGKHVA	Ovarian tumor	2015	Unpublished
Reviewed	A0A0B4J2A2	PPIAL4C	Peptidyl-prolyl cis-trans isomerase A-like 4C	108	AGPNTnGSQFFLCTAK	LIRKHTGSGILSMANAGPNTNGSQFFICTAKTEWLDGKHVA	Urine;Urine;Prostate tumor	2007;2007;2007	Unpublished;Unpublished
Reviewed	A0A0B4J2A2	PPIAL4C	Peptidyl-prolyl cis-trans isomerase A-like 4C	108	KHTGSGILSMANAGPNTnGSQF	LIRKHTGSGILSMANAGPNTNGSQFFICTAKTEWLDGKHVA	Serum;Prostate tumor;Breast tumor	2007;2007;2007	Unpublished;Unpublished;Unpublished
Reviewed	A0A0B4J2A2	PPIAL4C	Peptidyl-prolyl cis-trans isomerase A-like 4C	108	HTGSGILSMANAGPNTnGSQFFICTAK	LIRKHTGSGILSMANAGPNTNGSQFFICTAKTEWLDGKHVA	HCC cell lines (Liver);Serum;Prostate tumor;Breast tumor	2013;2007;2007;2007	40;Unpublished;Unpublished;Unpublished
Reviewed	A0A5B9	TRBC2	T-cell receptor beta-2 chain C region	69	EQPALnDSR	KEVHSGVSTDPQPLKEQPALNDSRYCLSSRLRVSATFWQNP	Prostate;Colorectal tumor;Liver;Serum;Prostate tumor;Lymphocytes	2014;2014;2014;2007;2007;2007	14;22;33;Unpublished;Unpublished;Unpublished
Reviewed	A0A5B9	TRBC2	T-cell receptor beta-2 chain C region	69	KEQPALnDSRY	KEVHSGVSTDPQPLKEQPALNDSRYCLSSRLRVSATFWQNP	Liver	2014	33
Reviewed	A0A5B9	TRBC2	T-cell receptor beta-2 chain C region	69	EVHSGVSTDPQPLKEQPALnDSR	KEVHSGVSTDPQPLKEQPALNDSRYCLSSRLRVSATFWQNP	Urine;Liver	2007;2014	Unpublished;33
Reviewed	A0AUZ9	KANSL1L	KAT8 regulatory NSL complex subunit 1-like protein	86	HYQTVFLMRSnSTLNKHNENYKQK	KHFGSPQSSKHYQTVFLMRSNSTLNKHNENYKQKKLGEPSC	Serum;Prostate tumor	2007;2007	Unpublished;Unpublished
Reviewed	A0AUZ9	KANSL1L	KAT8 regulatory NSL complex subunit 1-like protein	364	NVAVnCSTEWKWLVDR	TDSSSDDDLDEYTLRKNVAVNCSTEWKWLVDRARVGSRWTW	Serum	2010	40
Reviewed	A0AV96	RBM47	RNA-binding protein 47	302	EDAVHAMNNLnGTELEGSCLEVTLAKPVDKEQYSRYQK	DYAFVHFTSREDAVHAMNNLNGTELEGSCLEVTLAKPVDKE	Serum	2015	Unpublished
Reviewed	A0AVI2	FER1L5	Fer-1-like protein 5	45	VVEGNDPVWnETLIWHLWNRPLENDSFLQVTLQDMGSQKK	IDFRDIKKRTRVVEGNDPVWNETLIWHLWNRPLENDSFLQV	Serum	2015	Unpublished
Reviewed	A0AVI2	FER1L5	Fer-1-like protein 5	59	VVEGNDPVWNETLIWHLWNRPLEnDSFLQVTLQDMGSQKK	GNDPVWNETLIWHLWNRPLENDSFLQVTLQDMGSQKKERFI	Serum	2015	Unpublished
Reviewed	A0AVK6	E2F8	Transcription factor E2F8	659	EnSSALSPNHR	LIPLTQCSSLGAESILSGKENSSALSPNHRIYSSPIAGVIP	Colorectal tumor	2014	22
Reviewed	A0AVT1	UBA6	Ubiquitin-like modifier-activating enzyme 6	220	EIFISnITQANPGIVTCLENHPHK	GDEFEVLDTTGEEPKEIFISNITQANPGIVTCLENHPHKLE	Serum;Prostate tumor;Ovarian tumor	2007;2007;2007	Unpublished;Unpublished;Unpublished
Reviewed	A0FGR8	ESYT2	Extended synaptotagmin-2	643	FQLSNSGPnSTIK	LLTSEDMTVSQRFQLSNSGPNSTIKMKIALRVLHLEKRERP	Prostate tumor;Lymphocytes	2007;2007	Unpublished;Unpublished
Reviewed	A0JNW5	UHRF1BP1L	UHRF1-binding protein 1-like	675	GnITPQLNK	PIFQRHAHEQDTKMHEIYKGNITPQLNKNTLKTSAATDVWA	Sample information lost	2007	Unpublished
Reviewed	A0JP26	POTEB3	POTE ankyrin domain family member B3	432	HGSNPVGLPEnLTNGASAGNGDDGLIPQRK	DREVEEEIKKHGSNPVGLPENLTNGASAGNGDDGLIPQRKS	Prostate tumor;Ovarian tumor	2007;2007	Unpublished;Unpublished
Reviewed	A0PJK1	SLC5A10	Sodium/glucose cotransporter 5	239	TIAnTTCHLPR	GGYGQLEAAYAQAIPSRTIANTTCHLPRTDAMHMFRDPHTG	Urine;Urine	2015;2015;	Unpublished;Unpublished;Unpublished
Reviewed	A0PJZ3	GXYLT2	Glucoside xylosyltransferase 2	233	LFnSTQLAAMAPEHEIPK	DTDVLFLRPVDDIWKLLRLFNSTQLAAMAPEHEIPKIGWYS	Jurkat T cell line;Ovarian tumor	2014;2015	13;Unpublished
Reviewed	A1A5B4	ANO9	Anoctamin-9	641	EGnSTVDCIK	SEFIPRVVYKYRYSPCLKEGNSTVDCLKGYVNHSLSVFHTK	DLBCL cell lines (Diffuse large B-cell lymphoma)	2014	16
Reviewed	A1A5B4	ANO9	Anoctamin-9	641	EGnSTVDCLK	SEFIPRVVYKYRYSPCLKEGNSTVDCLKGYVNHSLSVFHTK	Colorectal tumor	2014	22
Reviewed	A1A5B4	ANO9	Anoctamin-9	652	GYVnHSISVFHTK	RYSPCLKEGNSTVDCLKGYVNHSLSVFHTKDFQDPDGIEGS	DLBCL cell lines (Diffuse large B-cell lymphoma)	2014	16
Reviewed	A1A5B4	ANO9	Anoctamin-9	652	GYVnHSLSVFHTK	RYSPCLKEGNSTVDCLKGYVNHSLSVFHTKDFQDPDGIEGS	Ovarian tumor	2015	Unpublished
Reviewed	A1A5B4	ANO9	Anoctamin-9	674	DFQDPDGIEGSEnVTLCR	SLSVFHTKDFQDPDGIEGSENVTLCRYRDYRNPPDYNFSEQ	Colorectal tumor;Breast cancer xenografts	2014;2015	22;Unpublished
Reviewed	A1A5C7	SLC22A23	Solute carrier family 22 member 23	173	SnSSGADGGDTPPLPSPPDK	TSLPTTPFATAPWEAAGNRSNSSGADGGDTPPLPSPPDKGD	Prostate tumor;Lymphocytes	2007;2007	Unpublished;Unpublished
Reviewed	A1L020	MEX3A	RNA-binding protein MEX3A	397	nATPTSVLFSSASSSSSSSAK	KQDVYYGVAETSPPLWAGQENATPTSVLFSSASSSSSSSAK	OVCAR-3 cell line (Ovarian cancer)	2015	1
Reviewed	A1L4H1	SSC5D	Soluble scavenger receptor cysteine-rich domain-containing protein SSC5D	376	GnETALR	GAFFGEGSGPIILDDLRCRGNETALRFCPARPWGQHDCHHR	Breast cancer xenografts;Serum	2015;2015	Unpublished;10
Reviewed	A1Z1Q3	MACROD2	O-acetyl-ADP-ribose deacetylase MACROD2	309	DEnITK	GPASEEAVEDCKDEDFAKDENITKGGEVTDHSVRDQDHPDG	Breast cancer xenografts	2015	Unpublished
Reviewed	A2A2Z9	ANKRD18B	Ankyrin repeat domain-containing protein 18B	470	MGSnISQLTDKNELLTEQVHKAR	DLELVLWRADDVSRHETMGSNISQLTDKNELLTEQVHKARV	Serum;Prostate tumor	2007;2007	Unpublished;Unpublished
Reviewed	A2A3L6	TTC24	Tetratricopeptide repeat protein 24	494	AGPGRPELCFLPGTVnHSHHLASSCPTFTK	NVPVRAGPGRPELCFLPGTVNHSHHLASSCPTFTKHTPCRG	Serum	2015	Unpublished
Reviewed	A2PYH4	HFM1	Probable ATP-dependent DNA helicase HFM1	1372	KPQnLSPEIEK	KLPQQAGNAVIVHFQERKPQNLSPEIEKQCFTFSEKNPNSS	HCC cell lines (Liver)	2013	40
Reviewed	A2RU67	KIAA1467	Uncharacterized protein KIAA1467	237	nATSGKAIW	GSLAETICLVTGTHKMLSAFNATSGKAIWTLNPNYLSNGTL	Liver	2014	33
Reviewed	A2RU67	KIAA1467	Uncharacterized protein KIAA1467	237	MISAFnATSGK	GSLAETICLVTGTHKMLSAFNATSGKAIWTLNPNYLSNGTL	DLBCL cell lines (Diffuse large B-cell lymphoma)	2014	16
Reviewed	A2RU67	KIAA1467	Uncharacterized protein KIAA1467	237	MLSAFnATSGK	GSLAETICLVTGTHKMLSAFNATSGKAIWTLNPNYLSNGTL	Pancreatic islets; Jurkat T cell line;Prostate;HEK293 cell line (embryonic kidney);Liver;OVCAR-3 cell line (Ovarian cancer);LNCap/PC3 cell lines (Prostate cancer);Breast cancer xenografts;Prostate tumor;Urine;Urine;Hela cell line (cervical cancer)	2012;2014;2014;2014;2014;2015;2015;2015;2015;2015;2015;2015;	48;13;14;15;33;1;2;Unpublished;Unpublished;Unpublished;Unpublished;12;Unpublished
Reviewed	A2RU67	KIAA1467	Uncharacterized protein KIAA1467	237	KMLSAFnATSGK	GSLAETICLVTGTHKMLSAFNATSGKAIWTLNPNYLSNGTL	Pancreatic islets	2012	48
Reviewed	A2RU67	KIAA1467	Uncharacterized protein KIAA1467	237	SAFnATSGKAIW	GSLAETICLVTGTHKMLSAFNATSGKAIWTLNPNYLSNGTL	Liver	2014	33
Reviewed	A2RU67	KIAA1467	Uncharacterized protein KIAA1467	237	KMISAFnATSGKA	GSLAETICLVTGTHKMLSAFNATSGKAIWTLNPNYLSNGTL	Breast Cancer cell lines	2013	37
Reviewed	A2RU67	KIAA1467	Uncharacterized protein KIAA1467	254	AIWTLNPNYLSnGTLAAPVVVLPDLDEDGVR	SAFNATSGKAIWTLNPNYLSNGTLAAPVVVLPDLDEDGVRD	OVCAR-3 cell line (Ovarian cancer);LNCap/PC3 cell lines (Prostate cancer)	2015;2015	1;2
Reviewed	A2RU67	KIAA1467	Uncharacterized protein KIAA1467	372	SInLSELIDVYSDGVELLQMVK	DSSPPSLQIEEPEWEKRRSINLSELIDVYSDGVELLQMVKA	Liver;LNCap/PC3 cell lines (Prostate cancer)	2014;2015	33;2
Reviewed	A2RU67	KIAA1467	Uncharacterized protein KIAA1467	396	nCSNLLITTR	LIDVYSDGVELLQMVKAPDSNCSNLLITTRQSLVLLRGQNL	OVCAR-3 cell line (Ovarian cancer)	2015	1
Reviewed	A2RU67	KIAA1467	Uncharacterized protein KIAA1467	396	APDSnCSNIIITTR	LIDVYSDGVELLQMVKAPDSNCSNLLITTRQSLVLLRGQNL	DLBCL cell lines (Diffuse large B-cell lymphoma)	2014	16
Reviewed	A2RU67	KIAA1467	Uncharacterized protein KIAA1467	396	APDSnCSNLLITTR	LIDVYSDGVELLQMVKAPDSNCSNLLITTRQSLVLLRGQNL	Pancreatic islets; Jurkat T cell line;HEK293 cell line (embryonic kidney);Hela cell line (cervical cancer);Liver;OVCAR-3 cell line (Ovarian cancer);LNCap/PC3 cell lines (Prostate cancer);Breast cancer xenografts;Hela cell line (cervical cancer)	2012;2014;2014;2014;2014;2015;2015;2015;2015	48;13;15;17;33;1;2;Unpublished;12
Reviewed	A2RU67	KIAA1467	Uncharacterized protein KIAA1467	415	GQnLTPYWALR	SNCSNLLITTRQSLVLLRGQNLTPYWALRLQGLRSQPTPGY	HEK293 cell line (embryonic kidney)	2014	15
Reviewed	A2RUS2	DENND3	DENN domain-containing protein 3	488	RMVVSMPNLQDIAMPELAPRnSS	RMVVSMPNLQDIAMPELAPRNSSLRLTDTAGCRGSSAVLNV	Urine	2007	Unpublished
Reviewed	A2RUS2	DENND3	DENN domain-containing protein 3	930	VTVFnASSWTI	VEDAHPKLWCALSEGKVTVFNASSWTIHQHSFKVGTAKVNC	Urine;Urine;Prostate tumor	2007;2007;2007	Unpublished;Unpublished
Reviewed	A2VDJ0	KIAA0922	Transmembrane protein 131-like	225	TTnTSLLQVQLE	YFLLPKVQSIQLSQMQAETTNTSLLQVQLECSLHNKVCQQL	Liver	2014	33
Reviewed	A2VDJ0	KIAA0922	Transmembrane protein 131-like	225	nTSLLQVQLECSLHNK	YFLLPKVQSIQLSQMQAETTNTSLLQVQLECSLHNKVCQQL	OVCAR-3 cell line (Ovarian cancer)	2015	1
Reviewed	A2VDJ0	KIAA0922	Transmembrane protein 131-like	225	VQSIQISQMQAETTnTSIIQVQIECSIHNK	YFLLPKVQSIQLSQMQAETTNTSLLQVQLECSLHNKVCQQL	DLBCL cell lines (Diffuse large B-cell lymphoma)	2014	16
Reviewed	A2VDJ0	KIAA0922	Transmembrane protein 131-like	268	LQMSIMVTMEnFSK	CYLESDDVLRLQMSIMVTMENFSKEFEENTQHLLDHLSIVY	OVCAR-3 cell line (Ovarian cancer)	2015	1
Reviewed	A2VDJ0	KIAA0922	Transmembrane protein 131-like	343	DAISIQFEPVIIPTSTTnFTK	SQRDALSLQFEPVLLPTSTTNFTKIASFTCKATSCDSGIIE	DLBCL cell lines (Diffuse large B-cell lymphoma)	2014	16
Reviewed	A2VDJ0	KIAA0922	Transmembrane protein 131-like	343	DALSLQFEPVLLPTSTTnFTK	SQRDALSLQFEPVLLPTSTTNFTKIASFTCKATSCDSGIIE	HEK293 cell line (embryonic kidney);Liver;OVCAR-3 cell line (Ovarian cancer);Breast cancer xenografts	2014;2014;2015;2015	15;33;1;Unpublished
Reviewed	A2VDJ0	KIAA0922	Transmembrane protein 131-like	403	HIETHEnTSGLW	AQGYFRMDSSATQFHIETHENTSGLWSIWYRNHFDRSVVLN	Liver	2014	33
Reviewed	A2VDJ0	KIAA0922	Transmembrane protein 131-like	403	THEnTSGLWSIWYR	AQGYFRMDSSATQFHIETHENTSGLWSIWYRNHFDRSVVLN	Liver	2014	33
Reviewed	A2VDJ0	KIAA0922	Transmembrane protein 131-like	403	QFHIETHEnTSGLWSIWYR	AQGYFRMDSSATQFHIETHENTSGLWSIWYRNHFDRSVVLN	Prostate;Prostate tumor	2014;2015	14;Unpublished
Reviewed	A2VDJ0	KIAA0922	Transmembrane protein 131-like	593	nFSATALR	ESESFVFFLPRLIAEPGLMLNFSATALRSRMIKYFVVQNPS	OVCAR-3 cell line (Ovarian cancer)	2015	1
Reviewed	A2VDJ0	KIAA0922	Transmembrane protein 131-like	593	LIAEPGLMLnF	ESESFVFFLPRLIAEPGLMLNFSATALRSRMIKYFVVQNPS	Liver	2014	33
Reviewed	A2VDJ0	KIAA0922	Transmembrane protein 131-like	593	IIAEPGIMInFSATAIR	ESESFVFFLPRLIAEPGLMLNFSATALRSRMIKYFVVQNPS	DLBCL cell lines (Diffuse large B-cell lymphoma)	2014	16
Reviewed	A2VDJ0	KIAA0922	Transmembrane protein 131-like	593	LIAEPGLMLnFSATALR	ESESFVFFLPRLIAEPGLMLNFSATALRSRMIKYFVVQNPS	Liver	2014	33
Reviewed	A2VDJ0	KIAA0922	Transmembrane protein 131-like	649	MQMInFTTGEFQLTEACPYLGTHSEESR	KPEALVHLLHRWFGTDMQMINFTTGEFQLTEACPYLGTHSE	Serum	2015	Unpublished
Reviewed	A2VDJ0	KIAA0922	Transmembrane protein 131-like	709	NnITVIDMIGVEGFGAR	GVVFTPADYGKVTSLILIRNNLTVIDMIGVEGFGARELLKV	DLBCL cell lines (Diffuse large B-cell lymphoma)	2014	16
Reviewed	A2VDJ0	KIAA0922	Transmembrane protein 131-like	709	NnLTVIDMIGVEGFGAR	GVVFTPADYGKVTSLILIRNNLTVIDMIGVEGFGARELLKV	Liver;Breast cancer xenografts	2014;2015	33;Unpublished
Reviewed	A2VDJ0	KIAA0922	Transmembrane protein 131-like	809	SLDPnTSRDISIVF	YNCQGYGFEVLDCHQFSLDPNTSRDISIVFTPDFTSSWVIR	Liver	2014	33
Reviewed	A2VDJ0	KIAA0922	Transmembrane protein 131-like	809	INGYNCQGYGFEVIDCHQFSIDPnTSR	YNCQGYGFEVLDCHQFSLDPNTSRDISIVFTPDFTSSWVIR	DLBCL cell lines (Diffuse large B-cell lymphoma)	2014	16
Reviewed	A2VDJ0	KIAA0922	Transmembrane protein 131-like	908	QnASSSSQQNNGPMDVISPHSYK	IAFQQAQYILMEFMKTRQRQNASSSSQQNNGPMDVISPHSY	Serum;Prostate tumor;Breast tumor;Ovarian tumor	2007;2007;2007;2007	Unpublished;Unpublished;Unpublished;Unpublished
Reviewed	A2VEC9	SSPO	SCO-spondin	2936	LCLTQGPGIECTGFCAPGCTCPPGLFLHnASCLPR	IECTGFCAPGCTCPPGLFLHNASCLPRSQCPCQLHGQLYAS	Serum	2015	Unpublished
Reviewed	A4D0S4	LAMB4	Laminin subunit beta-4	1333	STInTSANTR	KYYHISSSAEKKINETSSTINTSANTRNDLLTILDTLTSKG	Prostate tumor;Ovarian tumor	2007;2007	Unpublished;Unpublished
Reviewed	A4D0V7	CPED1	Cadherin-like and PC-esterase domain-containing protein 1	251	EQLnETTVLAPHETIFR	LLKTVKPRVWKPGDWSREQLNETTVLAPHETIFRAEDLSVI	Liver	2014	33
Reviewed	A4D0V7	CPED1	Cadherin-like and PC-esterase domain-containing protein 1	791	LnETLQEWQK	ILFIGDSTNRGIMYYLIERLNETLQEWQKVHGTKFYHNVNG	Liver	2014	33
Reviewed	A4D174	C7orf71	Putative uncharacterized protein C7orf71	69	GLGEANPAYALILDFQPPELQnLSEMGINHELGYSSIIPMMK	LGEANPAYALILDFQPPELQNLSEMGINHELGYSSIIPMMK	Serum	2015	Unpublished
Reviewed	A4D1N5	NULL	Putative uncharacterized protein FLJ40288	112	LLnLSR	VLLGEDLSSSGWNSWVFGILNISRDEEAIGILTTILQLRET	HCC cell lines (Liver)	2013	40
Reviewed	A4D1S0	KLRG2	Killer cell lectin-like receptor subfamily G member 2	395	nCSTPRPWVCAK	GEDNLDINCGALEEGTLVAANCSTPRPWVCAKGTQ------	OVCAR-3 cell line (Ovarian cancer)	2015	1
Reviewed	A4D1T9	PRSS37	Probable inactive serine protease 37	90	YWnYSHSAPQDDIMIIK	SRVRDGTEQTINPIQIVRYWNYSHSAPQDDLMLIKLAKPAM	Spermatozoa	2013	43
Reviewed	A4D256	CDC14C	Dual specificity protein phosphatase CDC14C	333	NHnVTTIIR	LESGYHQHSPETYIQYFKNHNVTTIIRLNKRMYDAKRFTDA	Urine;Urine	2015;2015;	Unpublished;Unpublished;Unpublished
Reviewed	A4UGR9	XIRP2	Xin actin-binding repeat-containing protein 2	772	GDVKnYTHI	DKKEYTRTVKLEEVDRGDVKNYTHIFESNNLIKFDASHKIE	Urine	2007	Unpublished
Reviewed	A4UGR9	XIRP2	Xin actin-binding repeat-containing protein 2	1591	QLHTESnETLTAK	FTTCIEAGALDYLKQLHTESNETLTAKKQEGEKEIIGGDVE	Urine;Urine;Prostate tumor	2007;2007;2007	Unpublished;Unpublished
Reviewed	A5A3E0	POTEF	POTE ankyrin domain family member F	240	AVQCQEDECALMLLEHGTDPNIPDEYGnTTLHYAIYNEDK	ECALMLLEHGTDPNIPDEYGNTTLHYAIYNEDKLMAKALLL	Serum	2015	Unpublished
Reviewed	A5A3E0	POTEF	POTE ankyrin domain family member F	712	nGSGMCK	KALQLNELTMDDDTAVLVIDNGSGMCKAGFAGDDAPRAVFP	OVCAR-3 cell line (Ovarian cancer)	2015	1
Reviewed	A5X5Y0	HTR3E	5-hydroxytryptamine receptor 3E	31	GVTFTInCSGFGQHGADPTALNSVFNR	FSFYLLLGFLLQGRGVTFTINCSGFGQHGADPTALNSVFNR	Serum;Prostate tumor	2007;2007	Unpublished;Unpublished
Reviewed	A5YKK6	CNOT1	CCR4-NOT transcription complex subunit 1	135	nSSSSDLR	LSKVLKLSKVQEVIFGLALLNSSSSDLRGFAAQFIKQKLPD	OVCAR-3 cell line (Ovarian cancer)	2015	1
Reviewed	A5YKK6	CNOT1	CCR4-NOT transcription complex subunit 1	1105	NnLSQSNMTQK	TERIVEPPENIQEKIAFIFNNLSQSNMTQKVEELKETVKEE	Ovarian tumor	2015	Unpublished
Reviewed	A5YKK6	CNOT1	CCR4-NOT transcription complex subunit 1	1105	IFNnLSQSNMTQK	TERIVEPPENIQEKIAFIFNNLSQSNMTQKVEELKETVKEE	Prostate tumor;Breast tumor	2007;2007	Unpublished;Unpublished
Reviewed	A5YKK6	CNOT1	CCR4-NOT transcription complex subunit 1	1110	NNLSQSnMTQK	EPPENIQEKIAFIFNNLSQSNMTQKVEELKETVKEEFMPWV	Ovarian tumor	2015	Unpublished
Reviewed	A5YKK6	CNOT1	CCR4-NOT transcription complex subunit 1	1110	IFNNLSQSnMTQK	EPPENIQEKIAFIFNNLSQSNMTQKVEELKETVKEEFMPWV	Prostate tumor;Breast tumor	2007;2007	Unpublished;Unpublished
Reviewed	A6H8Y1	BDP1	Transcription factor TFIIIB component B'' homolog	962	ATGnESSPR	NGPEEVKPLGEVETDLKATGNESSPREKTPEVTDATEEIDK	Prostate tumor;Ovarian tumor	2007;2007	Unpublished;Unpublished
Reviewed	A6H8Y1	BDP1	Transcription factor TFIIIB component B'' homolog	1959	QEEnLSVPFEMTTSEH	VVEHELPNTDVTTEEMKQEENLSVPFEMTTSEHIQDEPGTN	Urine	2007	Unpublished
Reviewed	A6NC57	ANKRD62	Ankyrin repeat domain-containing protein 62	99	LnLTDSE	ACAHGRPGVVADLVARKCQLNLTDSENRTALIKAVQCQEEV	Liver	2014	33
Reviewed	A6NC57	ANKRD62	Ankyrin repeat domain-containing protein 62	99	KCQLnLTDSENR	ACAHGRPGVVADLVARKCQLNLTDSENRTALIKAVQCQEEV	Serum;Prostate tumor	2007;2007	Unpublished;Unpublished
Reviewed	A6NC57	ANKRD62	Ankyrin repeat domain-containing protein 62	105	KCQLNLTDSEnR	PGVVADLVARKCQLNLTDSENRTALIKAVQCQEEVCASILL	Serum;Prostate tumor	2007;2007	Unpublished;Unpublished
Reviewed	A6NC57	ANKRD62	Ankyrin repeat domain-containing protein 62	150	DMYGNTALHYAIDNEnISMAR	NPNVRDMYGNTALHYAIDNENISMARKLLAYGADIEARSQD	Serum	2015	10
Reviewed	A6NCK2	TRIM43B	Tripartite motif-containing protein 43B	418	VGVFLDFESGSVSFLnVTK	KPLGRVGVFLDFESGSVSFLNVTKSSLIWSYPAGSLTFPVR	Prostate tumor;Breast tumor	2007;2007	Unpublished;Unpublished
Reviewed	A6NCW0	USP17L3	Ubiquitin carboxyl-terminal hydrolase 17-like protein 3	444	FLQEQnK	LVERATQESTLDHWKFLQEQNKTKPEFNVGKVEGTLPPNAL	Liver	2014	33
Reviewed	A6NCW7	USP17L4	Inactive ubiquitin carboxyl-terminal hydrolase 17-like protein 4	488	NHHPEQQSSLLnLSSMNSTDQESMNTGTLASLQGR	QSKYKCGMKNHHPEQQSSLLNLSSMNSTDQESMNTGTLASL	Serum	2015	Unpublished
Reviewed	A6NCW7	USP17L4	Inactive ubiquitin carboxyl-terminal hydrolase 17-like protein 4	493	NHHPEQQSSLLNLSSMnSTDQESMNTGTLASLQGR	CGMKNHHPEQQSSLLNLSSMNSTDQESMNTGTLASLQGRTR	Serum	2015	Unpublished
Reviewed	A6NDA9	LRIT2	Leucine-rich repeat, immunoglobulin-like domain and transmembrane domain-containing protein 2	261	nITIR	LFHETELSACMKPQISTPSANITIRAGQNVTLRCLAQASPS	Liver	2014	33
Reviewed	A6NDA9	LRIT2	Leucine-rich repeat, immunoglobulin-like domain and transmembrane domain-containing protein 2	261	nITLR	LFHETELSACMKPQISTPSANITIRAGQNVTLRCLAQASPS	Liver	2014	33
Reviewed	A6NDA9	LRIT2	Leucine-rich repeat, immunoglobulin-like domain and transmembrane domain-containing protein 2	261	nLTIR	LFHETELSACMKPQISTPSANITIRAGQNVTLRCLAQASPS	Liver	2014	33
Reviewed	A6NDA9	LRIT2	Leucine-rich repeat, immunoglobulin-like domain and transmembrane domain-containing protein 2	261	nLTLR	LFHETELSACMKPQISTPSANITIRAGQNVTLRCLAQASPS	Liver	2014	33
Reviewed	A6NDX5	ZNF840P	Putative zinc finger protein 840	484	FNnNSNLNK	KKIHTGEKPYECGECGKRFNNNSNLNKHKKIHTGEKHFVCN	Colorectal cancer cell line, HCT-116 (colorectal cancer)	2011	58
Reviewed	A6NE02	BTBD17	BTB/POZ domain-containing protein 17	44	ADVGGEAAGTSInHSQAVLQR	LVTHAAQRADVGGEAAGTSINHSQAVLQRLQELLRQGNASD	Non-small Cell Lung Carcinoma	2014	18
Reviewed	A6NE02	BTBD17	BTB/POZ domain-containing protein 17	61	QGnASDVVLR	TSINHSQAVLQRLQELLRQGNASDVVLRVQAAGTDEVRVFH	Non-small Cell Lung Carcinoma	2014	18
Reviewed	A6NE02	BTBD17	BTB/POZ domain-containing protein 17	61	LQELLRQGnASDVVLR	TSINHSQAVLQRLQELLRQGNASDVVLRVQAAGTDEVRVFH	Non-small Cell Lung Carcinoma	2014	18
Reviewed	A6NE02	BTBD17	BTB/POZ domain-containing protein 17	307	FFDVnGSAFLPR	LQAYQFHAASPLHYAKFFDVNGSAFLPRNYLAPAWGAPWVI	Non-small Cell Lung Carcinoma	2014	18
Reviewed	A6NF34	ANTXRL	Anthrax toxin receptor-like	293	FIFnESTIIDEKPTSIDNNSMNCPGPK	HGNGFQNLKKRDEVICRFIFNESTIIDEKPTSIDNNSMNCP	Spermatozoa	2013	43
Reviewed	A6NF34	ANTXRL	Anthrax toxin receptor-like	307	FIFNESTIIDEKPTSIDnNSMNCPGPK	ICRFIFNESTIIDEKPTSIDNNSMNCPGPKLEKPGEEYSIE	Spermatozoa	2013	43
Reviewed	A6NFC5	TMEM235	Transmembrane protein 235	41	VADAGnGSAWPGR	LLAAAVASDYWYILEVADAGNGSAWPGRAELLSSHSGLWRI	Liver	2014	33
Reviewed	A6NFN3	RBFOX3	RNA binding protein fox-1 homolog 3	159	nGTIVEGR	GFGFVTFETSSDADRAREKLNGTIVEGRKIEVNNATARVMT	OVCAR-3 cell line (Ovarian cancer)	2015	1
Reviewed	A6NFN3	RBFOX3	RNA binding protein fox-1 homolog 3	172	IEVNnATAR	DRAREKLNGTIVEGRKIEVNNATARVMTNKKTGNPYTNGWK	Urine;Urine	2015;2015;	Unpublished;Unpublished;Unpublished
Reviewed	A6NG13	MGAT4D	Alpha-1,3-mannosyl-glycoprotein 4-beta-N-acetylglucosaminyltransferase-like protein MGAT4D	275	GnISSN	LEDDIIAKEMYFTKITDFVGNISSNNWFFIEFSMLGFIGKL	Prostate tumor	2007	Unpublished
Reviewed	A6NGJ6	TRIM64	Tripartite motif-containing protein 64	414	nGSVSFF	PLIQYVQRPLGQVGVFLDYDNGSVSFFDVSKGSLIYGFPPS	Liver	2014	33
Reviewed	A6NGN4	PRAMEF25	PRAME family member 25	159	GRQPLTVFVELWLKnR	DCPRMRGRQPLTVFVELWLKNRTLDEHLTCLLLWVKQRKDL	Serum;Prostate tumor	2007;2007	Unpublished;Unpublished
Reviewed	A6NGN9	IGLON5	IgLON family member 5	67	VAWLnR	GDNATLSCFIDEHVTRVAWLNRSNILYAGNDRWTSDPRVRL	Urine;Liver;Urine;Urine;Urine;Prostate tumor	2007;2014;2015;2015;2007;2007	33;Unpublished;Unpublished
Reviewed	A6NGN9	IGLON5	IgLON family member 5	280	SMLLFAnVSAR	GTAEGLKVQTERTRSMLLFANVSARHYGNYTCRAANRLGAS	Urine;Urine;Urine	2015;2015;2015;	Unpublished;Unpublished;Unpublished;Unpublished
Reviewed	A6NGN9	IGLON5	IgLON family member 5	288	HYGnYTCR	QTERTRSMLLFANVSARHYGNYTCRAANRLGASSASMRLLR	Pancreatic islets	2012	48
Reviewed	A6NGU5	GGT3P	Putative gamma-glutamyltranspeptidase 3	95	TIYnSTTR	VGLMNAHSMGIGVGLFLTIYNSTTRKAEVINAREVAPRLAF	Liver	2014	33
Reviewed	A6NGU5	GGT3P	Putative gamma-glutamyltranspeptidase 3	95	LTIYnSTTR	VGLMNAHSMGIGVGLFLTIYNSTTRKAEVINAREVAPRLAF	Urine;Liver;Urine;Prostate tumor	2007;2014;2007;2007	33;Unpublished;Unpublished
Reviewed	A6NGU5	GGT3P	Putative gamma-glutamyltranspeptidase 3	95	FLTIYnSTTR	VGLMNAHSMGIGVGLFLTIYNSTTRKAEVINAREVAPRLAF	Liver	2014	33
Reviewed	A6NGU5	GGT3P	Putative gamma-glutamyltranspeptidase 3	120	nSSEQSQK	KAEVINAREVAPRLAFASMFNSSEQSQKGGLSVAVPGEIRG	OVCAR-3 cell line (Ovarian cancer)	2015	1
Reviewed	A6NGU5	GGT3P	Putative gamma-glutamyltranspeptidase 3	120	MFnSSEQSQK	KAEVINAREVAPRLAFASMFNSSEQSQKGGLSVAVPGEIRG	Liver	2014	33
Reviewed	A6NGU5	GGT3P	Putative gamma-glutamyltranspeptidase 3	120	SMFnSSEQSQK	KAEVINAREVAPRLAFASMFNSSEQSQKGGLSVAVPGEIRG	Prostate tumor;Breast tumor;Breast cancer cell lines	2007;2007;2007	Unpublished;Unpublished;Unpublished
Reviewed	A6NGU5	GGT3P	Putative gamma-glutamyltranspeptidase 3	120	MFnSSEQSQKGG	KAEVINAREVAPRLAFASMFNSSEQSQKGGLSVAVPGEIRG	Liver	2009	64
Reviewed	A6NGU5	GGT3P	Putative gamma-glutamyltranspeptidase 3	120	LAFASMFnSSEQSQK	KAEVINAREVAPRLAFASMFNSSEQSQKGGLSVAVPGEIRG	Breast cell lines	2012	52
Reviewed	A6NGU5	GGT3P	Putative gamma-glutamyltranspeptidase 3	266	AELIEHPLnIS	GIVTAEDLNNYCAELIEHPLNISLGDAVLYMPSARLSGPVL	Liver	2014	33
Reviewed	A6NGU5	GGT3P	Putative gamma-glutamyltranspeptidase 3	266	LIEHPLnISLGD	GIVTAEDLNNYCAELIEHPLNISLGDAVLYMPSARLSGPVL	Liver	2014	33
Reviewed	A6NGU5	GGT3P	Putative gamma-glutamyltranspeptidase 3	266	AELIEHPLnISLGD	GIVTAEDLNNYCAELIEHPLNISLGDAVLYMPSARLSGPVL	Liver	2014	33
Reviewed	A6NGU5	GGT3P	Putative gamma-glutamyltranspeptidase 3	266	LIEHPLnISLGDAV	GIVTAEDLNNYCAELIEHPLNISLGDAVLYMPSARLSGPVL	Liver	2014	33
Reviewed	A6NGU5	GGT3P	Putative gamma-glutamyltranspeptidase 3	266	nISLGDAVLYMPSAR	GIVTAEDLNNYCAELIEHPLNISLGDAVLYMPSARLSGPVL	OVCAR-3 cell line (Ovarian cancer)	2015	1
Reviewed	A6NGU5	GGT3P	Putative gamma-glutamyltranspeptidase 3	266	AELIEHPLnISLGDAV	GIVTAEDLNNYCAELIEHPLNISLGDAVLYMPSARLSGPVL	Prostate tumor;Breast tumor;Breast cancer cell lines	2007;2007;2007	Unpublished;Unpublished;Unpublished
Reviewed	A6NGU5	GGT3P	Putative gamma-glutamyltranspeptidase 3	266	LIEHPLnISLGDAVLY	GIVTAEDLNNYCAELIEHPLNISLGDAVLYMPSARLSGPVL	Liver	2014	33
Reviewed	A6NGU5	GGT3P	Putative gamma-glutamyltranspeptidase 3	266	AELIEHPLnISLGDAVLY	GIVTAEDLNNYCAELIEHPLNISLGDAVLYMPSARLSGPVL	Liver	2014	33
Reviewed	A6NGU5	GGT3P	Putative gamma-glutamyltranspeptidase 3	297	GYnFSR	PSARLSGPVLALILNILKGYNFSRESVETPEQKGLTYHRIV	Ovarian tumor	2015	Unpublished
Reviewed	A6NGU5	GGT3P	Putative gamma-glutamyltranspeptidase 3	344	nMTSEFF	YAKRTLLGDPKFVDVTEVVRNMTSEFFAAQLRSQISDHTTH	Liver	2014	33
Reviewed	A6NGU5	GGT3P	Putative gamma-glutamyltranspeptidase 3	344	nMTSEFFAAQLR	YAKRTLLGDPKFVDVTEVVRNMTSEFFAAQLRSQISDHTTH	Urine;Platelet Plasma membranes;IGROV-1/CP cell line (Ovarian cancer)IGROV-1/CP;Breast cell lines;Urine;Prostate;Liver;Ovarian tumor;LNCap/PC3 cell lines (Prostate cancer);Breast cancer xenografts;Prostate tumor;Urine;Urine;Urine;Prostate tumor	2007;2007;2007;2012;2013;2014;2014;2015;2015;2015;2015;2015;2015;2007;2007	74;75;52;45;14;33;2;Unpublished;Unpublished
Reviewed	A6NGU5	GGT3P	Putative gamma-glutamyltranspeptidase 3	510	PnVTTVER	FGYDVKRAVEEPRLHNKLLPNVTTVERNIDQAVTAALETRH	Pancreatic islets;Prostate	2012;2014	48;14
Reviewed	A6NGU5	GGT3P	Putative gamma-glutamyltranspeptidase 3	510	LHNKLLPnVT	FGYDVKRAVEEPRLHNKLLPNVTTVERNIDQAVTAALETRH	Liver	2014	33
Reviewed	A6NGU5	GGT3P	Putative gamma-glutamyltranspeptidase 3	510	LLPnVTTVER	FGYDVKRAVEEPRLHNKLLPNVTTVERNIDQAVTAALETRH	Urine;Urine	2015;2015;	Unpublished;Unpublished;Unpublished
Reviewed	A6NGU5	GGT3P	Putative gamma-glutamyltranspeptidase 3	510	LHNKLLPnVTTVER	FGYDVKRAVEEPRLHNKLLPNVTTVERNIDQAVTAALETRH	Urine;Liver;Breast cell lines;Prostate;Colorectal tumor;Liver;Prostate tumor;Urine;Urine;Hela cell line (cervical cancer);Urine;Prostate tumor;Breast tumor;Breast cancer cell lines	2007;2009;2012;2014;2014;2014;2015;2015;2015;2015;2007;2007;2007;2007	64;52;14;22;33;12;Unpublished;Unpublished;Unpublished;Unpublished
Reviewed	A6NGW2	STRCP1	Putative stereocilin-like protein	1180	nITIR	ELPWSEQQAQFLWKKMQVPTNLTLRNLQALGTLAGGMSCEF	Liver	2014	33
Reviewed	A6NGW2	STRCP1	Putative stereocilin-like protein	1180	nITLR	ELPWSEQQAQFLWKKMQVPTNLTLRNLQALGTLAGGMSCEF	Liver	2014	33
Reviewed	A6NGW2	STRCP1	Putative stereocilin-like protein	1180	nLTIR	ELPWSEQQAQFLWKKMQVPTNLTLRNLQALGTLAGGMSCEF	Liver	2014	33
Reviewed	A6NGW2	STRCP1	Putative stereocilin-like protein	1180	nLTLR	ELPWSEQQAQFLWKKMQVPTNLTLRNLQALGTLAGGMSCEF	Liver	2014	33
Reviewed	A6NH00	OR2T8	Olfactory receptor 2T8	3	MEnGSYTSYFILLGLFNHTR	------------------MENGSYTSYFILLGLFNHTRAHQ	Serum	2015	Unpublished
Reviewed	A6NH00	OR2T8	Olfactory receptor 2T8	17	MENGSYTSYFILLGLFnHTR	----MENGSYTSYFILLGLFNHTRAHQVLFMMVLSIVLTSL	Serum	2015	Unpublished
Reviewed	A6NH11	GLTPD2	Glycolipid transfer protein domain-containing protein 2	276	AAGTLEDVYnR	TEAEARAALVRAAGTLEDVYNRTQSLLAERGLLQLA-----	HCC cell lines (Liver);Liver;Urine;Urine;Urine	2013;2014;2015;2015;2015;	40;33;Unpublished;Unpublished;Unpublished;Unpublished
Reviewed	A6NH11	GLTPD2	Glycolipid transfer protein domain-containing protein 2	276	AGTLEDVYnRTQS	TEAEARAALVRAAGTLEDVYNRTQSLLAERGLLQLA-----	Liver	2009	64
Reviewed	A6NH11	GLTPD2	Glycolipid transfer protein domain-containing protein 2	276	AAGTLEDVYnRTQSLLAER	TEAEARAALVRAAGTLEDVYNRTQSLLAERGLLQLA-----	HuH-7 cell line (Liver);Liver	2013;2014	38;33
Reviewed	A6NHA9	OR4C46	Olfactory receptor 4C46	6	NnMTEFVLLGLTENPK	---------------MENRNNMTEFVLLGLTENPKMQKIIF	Breast cancer xenografts	2015	Unpublished
Reviewed	A6NHA9	OR4C46	Olfactory receptor 4C46	6	MENRNnMTEFVLLGLTENPKMQK	---------------MENRNNMTEFVLLGLTENPKMQKIIF	Serum	2013	42
Reviewed	A6NHN0	OTOL1	Otolin-1	372	FEKILYNDQGnYSPVTGK	PFPPPNIPIKFEKILYNDQGNYSPVTGKFNCSIPGTYVFSY	Serum;Prostate tumor	2007;2007	Unpublished;Unpublished
Reviewed	A6NHR9	SMCHD1	Structural maintenance of chromosomes flexible hinge domain-containing protein 1	787	LGnYTLK	QHGGKWPYWFKKMENIQKLGNYTLKLQVVLNESNADTYAGR	Urine;Urine	2015;2015;	Unpublished;Unpublished;Unpublished
Reviewed	A6NHR9	SMCHD1	Structural maintenance of chromosomes flexible hinge domain-containing protein 1	797	LQVVLnESNADTYAGR	KKMENIQKLGNYTLKLQVVLNESNADTYAGRPLPSKAIKFS	Urine	2007	Unpublished
Reviewed	A6NHR9	SMCHD1	Structural maintenance of chromosomes flexible hinge domain-containing protein 1	1082	EInITSALAEK	AGDIMHNLIFQMYDEGEREINITSALAEKIKVNWTPEINKE	Urine;Urine	2015;2015;	Unpublished;Unpublished;Unpublished
Reviewed	A6NHY2	ANKDD1B	Ankyrin repeat and death domain-containing protein 1B	101	VNINVVNNMnRTALHFAVGR	LDLMEKLFEKKVNINVVNNMNRTALHFAVGRNHLSAVDFLL	Serum	2015	Unpublished
Reviewed	A6NI03	TRIM64B	Putative tripartite motif-containing protein 64B	414	nGSVSFF	PLIQYVQRPLGRVGVFLDYDNGSVSFFDVSKGSLIYGFPPS	Liver	2014	33
Reviewed	A6NI73	LILRA5	Leukocyte immunoglobulin-like receptor subfamily A member 5	242	HILQVWSEPSDLLEIPVSGAADnLSPSQNK	LQVWSEPSDLLEIPVSGAADNLSPSQNKSDSGTASHLQDYA	Urine;Urine	2015;2015;	Unpublished;Unpublished;Unpublished
Reviewed	A6NI73	LILRA5	Leukocyte immunoglobulin-like receptor subfamily A member 5	248	HILQVWSEPSDLLEIPVSGAADNLSPSQnK	PSDLLEIPVSGAADNLSPSQNKSDSGTASHLQDYAVENLIR	Urine;Urine	2015;2015;	Unpublished;Unpublished;Unpublished
Reviewed	A6NJL1	ZSCAN5B	Zinc finger and SCAN domain-containing protein 5B	292	LnLSSPK	SACVVEREALTHSGNRGDALNLSSPKRSKPDASSISQEEPQ	Liver	2014	33
Reviewed	A6NJW4	LRRC3C	Leucine-rich repeat-containing protein 3C	79	CSQAGLSAVPSGIPnDTR	GERTFRCSQAGLSAVPSGIPNDTRKLYLDANQLASVPAGAF	Serum	2010	40
Reviewed	A6NJW9	CD8BP	Putative T-cell surface glycoprotein CD8 beta-2 chain	102	FILnLTSVKPE	GEEVEQEKIAVFRDASRFILNLTSVKPEDSGIYFCMIVGSP	Liver	2014	33
Reviewed	A6NJW9	CD8BP	Putative T-cell surface glycoprotein CD8 beta-2 chain	102	ILnLTSVKPEDSGIY	GEEVEQEKIAVFRDASRFILNLTSVKPEDSGIYFCMIVGSP	Liver	2014	33
Reviewed	A6NK06	IRG1	Cis-aconitate decarboxylase	425	AnASKMLSWDTVESLIK	FYGHWRKPLSQEDLEEKFRANASKMLSWDTVESLIKIVKNL	Plasma	2005	81
Reviewed	A6NKC4	FCGR1C	Putative high affinity immunoglobulin gamma Fc receptor IC	78	ITSASVnDSGEYR	LNGTATQTSTPSYRITSASVNDSGEYRCQRGLSGRSDPIQL	Liver;ovarian tumor;Ovarian tumor;Prostate;Colorectal tumor;Liver tumor (HCC);Liver;Ovarian tumorPBMC Macrophage cells;Prostate tumor;Urine;Urine;Prostate tumor;Breast tumor;Ovarian tumor	2009;2011;2013;2014;2014;2014;2014;2015;2015;2015;2015;2015;2007;2007;2007	64;54;34;14;22;32;33;Unpublished;Unpublished;Unpublished
Reviewed	A6NKC4	FCGR1C	Putative high affinity immunoglobulin gamma Fc receptor IC	78	RITSASVnDSGEY	LNGTATQTSTPSYRITSASVNDSGEYRCQRGLSGRSDPIQL	Liver	2014	33
Reviewed	A6NKC4	FCGR1C	Putative high affinity immunoglobulin gamma Fc receptor IC	152	FFHWNSnLTILK	VYNVLYYRNGKAFKFFHWNSNLTILKTNISHNGTYHCSGKG	Ovarian tumor	2015	Unpublished
Reviewed	A6NKC4	FCGR1C	Putative high affinity immunoglobulin gamma Fc receptor IC	152	KAFKFFHWNSnLTILKTNIS	VYNVLYYRNGKAFKFFHWNSNLTILKTNISHNGTYHCSGKG	Human	2015	6
Reviewed	A6NKC4	FCGR1C	Putative high affinity immunoglobulin gamma Fc receptor IC	159	KAFKFFHWNSNLTILKTnIS	RNGKAFKFFHWNSNLTILKTNISHNGTYHCSGKGKHHYTSA	Human	2015	6
Reviewed	A6NKQ9	CGB1	Choriogonadotropin subunit beta variant 1	63	PRCRPInATIAVE	LSMGGTWASKEPLRPRCRPINATLAVEKEGCPVCITVNTTI	Breast Cancer cell lines	2013	37
Reviewed	A6NKQ9	CGB1	Choriogonadotropin subunit beta variant 1	80	KEGCPVCITVnTTICAGYCP	RPINATLAVEKEGCPVCITVNTTICAGYCPTMTRVLQGVLP	Human	2015	6
Reviewed	A6NKT7	RGPD3	RanBP2-like and GRIP domain-containing protein 3	361	LLnLSR	QNLLEMMACDRLSQSGHMLLNLSRGKQDFLKVVVETFANKS	HCC cell lines (Liver)	2013	40
Reviewed	A6NKW6	FAM159B	Membrane protein FAM159B	15	LCSGYYSLnQSFVEPFQCPR	------MSEASRLCSGYYSLNQSFVEPFQCPRRGEGAALQY	Pancreatic islets	2012	48
Reviewed	A6NL88	SHISA7	Protein shisa-7	59	LTGALTGGGGAASPGAnGTR	HLRRLTGALTGGGGAASPGANGTRTGPAGGAGAAARAPPPA	Urine;Urine;Urine	2013;2015;2015;	45;Unpublished;Unpublished;Unpublished
Reviewed	A6NL88	SHISA7	Protein shisa-7	59	RLTGALTGGGGAASPGAnGTR	HLRRLTGALTGGGGAASPGANGTRTGPAGGAGAAARAPPPA	Urine;Urine	2015;2015;	Unpublished;Unpublished;Unpublished
Reviewed	A6NLI5	TRIM64C	Putative tripartite motif-containing protein 64C	412	nGSVSFF	PLIQYVQRPLGWVGVFLDYDNGSVSFFDVSKGSLIYGFPPS	Liver	2014	33
Reviewed	A6NM11	LRRC37A2	Leucine-rich repeat-containing protein 37A2	864	QVPVPEPNTHnGTFTIINFQGNYISYIDGNVWK	IDLNPEQRLRQVPVPEPNTHNGTFTILNFQGNYISYIDGNV	Spermatozoa	2013	43
Reviewed	A6NM11	LRRC37A2	Leucine-rich repeat-containing protein 37A2	900	IIIRENnITEIHK	IDGNVWKAYSWTEKLILRENNLTELHKDSFEGLLSLQYLDL	Spermatozoa	2013	43
Reviewed	A6NM11	LRRC37A2	Leucine-rich repeat-containing protein 37A2	900	IIIRENnITEIHKDSFEGIISIQYIDISCNK	IDGNVWKAYSWTEKLILRENNLTELHKDSFEGLLSLQYLDL	Spermatozoa	2013	43
Reviewed	A6NM11	LRRC37A2	Leucine-rich repeat-containing protein 37A2	943	FInLSCNVIT	NKIQSIERHTFEPLPFLKFINLSCNVITELSFGTFQAWHGM	Urine;Urine;Prostate tumor	2007;2007;2007	Unpublished;Unpublished
Reviewed	A6NM11	LRRC37A2	Leucine-rich repeat-containing protein 37A2	1053	IHCNSACITnTTHCPEEASVGNPEGAFMK	NSIEAVCKTVKLHCNSACLTNTTHCPEEASVGNPEGAFMKV	Spermatozoa	2013	43
Reviewed	A6NM11	LRRC37A2	Leucine-rich repeat-containing protein 37A2	1553	IENYInESTEAQSEQKEK	EVKASKIEWDTDQWKIENYINESTEAQSEQKEKSLELKKEV	Spermatozoa	2013	43
Reviewed	A6NM11	LRRC37A2	Leucine-rich repeat-containing protein 37A2	1553	IEWDTDQWKIENYInESTEAQSEQKEK	EVKASKIEWDTDQWKIENYINESTEAQSEQKEKSLELKKEV	Spermatozoa	2013	43
Reviewed	A6NM62	LRRC53	Leucine-rich repeat-containing protein 53	275	LSETNCDSKAPnFTLVLK	VAAAQSVLRLSETNCDSKAPNFTLVLKDRSPLLPGPDVALL	Urine;Urine;Prostate tumor	2007;2007;2007	Unpublished;Unpublished
Reviewed	A6NMB1	SIGLEC16	Sialic acid-binding Ig-like lectin 16	78	TGAPVATNnQSR	YGYWFKGRTSPKTGAPVATNNQSREVAMSTRDRFQLTGDPG	Liver	2014	33
Reviewed	A6NMB1	SIGLEC16	Sialic acid-binding Ig-like lectin 16	338	VMVSQAnR	ALDLSVQYPPENLRVMVSQANRTVLENLRNGTSLRVLEGQS	DLBCL cell lines (Diffuse large B-cell lymphoma);Liver	2014;2014	16;33
Reviewed	A6NMS7	LRRC37A	Leucine-rich repeat-containing protein 37A	864	QVPVPEPNTHnGTFTIINFQGNYISYIDGNVWK	IDLNPEQRLRQVPVPEPNTHNGTFTILNFQGNYISYIDGNV	Spermatozoa	2013	43
Reviewed	A6NMS7	LRRC37A	Leucine-rich repeat-containing protein 37A	900	IIIRENnITEIHK	IDGNVWKAYSWTEKLILRENNLTELHKDSFEGLLSLQYLDL	Spermatozoa	2013	43
Reviewed	A6NMS7	LRRC37A	Leucine-rich repeat-containing protein 37A	900	IIIRENnITEIHKDSFEGIISIQYIDISCNK	IDGNVWKAYSWTEKLILRENNLTELHKDSFEGLLSLQYLDL	Spermatozoa	2013	43
Reviewed	A6NMS7	LRRC37A	Leucine-rich repeat-containing protein 37A	943	FInLSCNVIT	NKIQSIERHTFEPLPFLKFINLSCNVITELSFGTFQAWHGM	Urine;Urine;Prostate tumor	2007;2007;2007	Unpublished;Unpublished
Reviewed	A6NMS7	LRRC37A	Leucine-rich repeat-containing protein 37A	1053	IHCNSACITnTTHCPEEASVGNPEGAFMK	NSIEAVCKTVKLHCNSACLTNTTHCPEEASVGNPEGAFMKV	Spermatozoa	2013	43
Reviewed	A6NMS7	LRRC37A	Leucine-rich repeat-containing protein 37A	1553	IENYInESTEAQSEQKEK	EVKASKIEWDTDQWKIENYINESTEAQSEQKEKSLELKKEV	Spermatozoa	2013	43
Reviewed	A6NMS7	LRRC37A	Leucine-rich repeat-containing protein 37A	1553	IEWDTDQWKIENYInESTEAQSEQKEK	EVKASKIEWDTDQWKIENYINESTEAQSEQKEKSLELKKEV	Spermatozoa	2013	43
Reviewed	A6NMZ7	COL6A6	Collagen alpha-6(VI) chain	198	DISMFSQnMTHIIK	ATSQFHFNLRTVRDLSMFSQNMTHIIKDVIKYKEGAVDDIF	Liver	2014	32
Reviewed	A6NMZ7	COL6A6	Collagen alpha-6(VI) chain	198	DLSMFSQnMTHIIK	ATSQFHFNLRTVRDLSMFSQNMTHIIKDVIKYKEGAVDDIF	Liver;Pancreatic islets;Liver;Ovarian tumor;Urine;Urine	2009;2012;2014;2015;2015;2015;	64;48;33;Unpublished;Unpublished;Unpublished;Unpublished
Reviewed	A6NMZ7	COL6A6	Collagen alpha-6(VI) chain	239	LLDMSInGSEENFDYLK	VEACQGPSMADVVFLLDMSINGSEENFDYLKGFLEESVSAL	Liver	2014	33
Reviewed	A6NMZ7	COL6A6	Collagen alpha-6(VI) chain	239	DVIKYKEGAVDDIFVEACQGPSMADVVFLLDMSInG	VEACQGPSMADVVFLLDMSINGSEENFDYLKGFLEESVSAL	Urine	2007	Unpublished
Reviewed	A6NMZ7	COL6A6	Collagen alpha-6(VI) chain	275	VGLVAYSnE	SVSALDIKENCMRVGLVAYSNETKVINSLSMGINKSEVLQH	Liver	2014	33
Reviewed	A6NMZ7	COL6A6	Collagen alpha-6(VI) chain	275	SnETKVINSL	SVSALDIKENCMRVGLVAYSNETKVINSLSMGINKSEVLQH	Liver	2014	33
Reviewed	A6NMZ7	COL6A6	Collagen alpha-6(VI) chain	275	VAYSnETKVIN	SVSALDIKENCMRVGLVAYSNETKVINSLSMGINKSEVLQH	Liver	2014	33
Reviewed	A6NMZ7	COL6A6	Collagen alpha-6(VI) chain	275	VGIVAYSnETK	SVSALDIKENCMRVGLVAYSNETKVINSLSMGINKSEVLQH	Liver	2014	32
Reviewed	A6NMZ7	COL6A6	Collagen alpha-6(VI) chain	275	VGLVAYSnETK	SVSALDIKENCMRVGLVAYSNETKVINSLSMGINKSEVLQH	Liver;Pancreatic islets;Ovarian tumor;Colorectal tumor;Liver;Ovarian tumor;Prostate tumor	2009;2012;2013;2014;2014;2015;2007	64;48;34;22;33;Unpublished
Reviewed	A6NMZ7	COL6A6	Collagen alpha-6(VI) chain	288	LSMGInKSE	VGLVAYSNETKVINSLSMGINKSEVLQHIQNLSPRTGKAYT	Liver	2009	64
Reviewed	A6NMZ7	COL6A6	Collagen alpha-6(VI) chain	288	SMGInKSEVL	VGLVAYSNETKVINSLSMGINKSEVLQHIQNLSPRTGKAYT	Liver	2014	33
Reviewed	A6NMZ7	COL6A6	Collagen alpha-6(VI) chain	288	VINSLSMGInK	VGLVAYSNETKVINSLSMGINKSEVLQHIQNLSPRTGKAYT	Pancreatic islets;Liver;Breast cancer xenografts	2012;2014;2015	48;33;Unpublished
Reviewed	A6NMZ7	COL6A6	Collagen alpha-6(VI) chain	288	VINSLSMGInKSEVLQHIQNLSPR	VGLVAYSNETKVINSLSMGINKSEVLQHIQNLSPRTGKAYT	Liver;Liver	2009;2014	64;33
Reviewed	A6NMZ7	COL6A6	Collagen alpha-6(VI) chain	298	VINSLSMGINKSEVLQHIQnLSPR	KVINSLSMGINKSEVLQHIQNLSPRTGKAYTGAAIKKLRKE	Liver;Liver	2009;2014	64;33
Reviewed	A6NMZ7	COL6A6	Collagen alpha-6(VI) chain	347	DSEDnVTK	RKNQGVPQIAVLVTHRDSEDNVTKAAVNLRREGVTIFTLGI	Liver;Ovarian tumor	2014;2015	33;Unpublished
Reviewed	A6NMZ7	COL6A6	Collagen alpha-6(VI) chain	347	VTHRDSEDnVTKAAVNL	RKNQGVPQIAVLVTHRDSEDNVTKAAVNLRREGVTIFTLGI	Liver	2014	33
Reviewed	A6NMZ7	COL6A6	Collagen alpha-6(VI) chain	400	AHnQTFLK	SHPAEQYVSKLKTFADLAAHNQTFLKKLRNQITHTVSVFSE	Liver	2014	33
Reviewed	A6NMZ7	COL6A6	Collagen alpha-6(VI) chain	400	ADLAAHnQTFL	SHPAEQYVSKLKTFADLAAHNQTFLKKLRNQITHTVSVFSE	Liver	2014	33
Reviewed	A6NMZ7	COL6A6	Collagen alpha-6(VI) chain	400	TFADIAAHnQTFIK	SHPAEQYVSKLKTFADLAAHNQTFLKKLRNQITHTVSVFSE	Liver tumor (HCC);Liver	2014;2014	32;32
Reviewed	A6NMZ7	COL6A6	Collagen alpha-6(VI) chain	400	TFADLAAHnQTFLK	SHPAEQYVSKLKTFADLAAHNQTFLKKLRNQITHTVSVFSE	Liver;Ovarian tumor;Prostate tumor;Breast tumor	2014;2015;2007;2007	33;Unpublished;Unpublished
Reviewed	A6NMZ7	COL6A6	Collagen alpha-6(VI) chain	400	TFADLAAHnQTFLKK	SHPAEQYVSKLKTFADLAAHNQTFLKKLRNQITHTVSVFSE	Liver	2014	33
Reviewed	A6NMZ7	COL6A6	Collagen alpha-6(VI) chain	400	LKTFADLAAHnQTFLK	SHPAEQYVSKLKTFADLAAHNQTFLKKLRNQITHTVSVFSE	Liver	2014	33
Reviewed	A6NMZ7	COL6A6	Collagen alpha-6(VI) chain	520	QMGGNTNTGAALnFTLSLLQK	GKAIENIRQMGGNTNTGAALNFTLSLLQKAKKQRGNKVPCH	Liver	2014	33
Reviewed	A6NMZ7	COL6A6	Collagen alpha-6(VI) chain	576	AnQTQLR	PANRLREEHIRVYAIGIKEANQTQLREIAGEEKRVYYVHDF	Liver	2014	33
Reviewed	A6NMZ7	COL6A6	Collagen alpha-6(VI) chain	576	EAnQTQLR	PANRLREEHIRVYAIGIKEANQTQLREIAGEEKRVYYVHDF	Pancreatic islets;Colorectal tumor;Liver;Ovarian tumor	2012;2014;2014;2015	48;22;33;Unpublished
Reviewed	A6NMZ7	COL6A6	Collagen alpha-6(VI) chain	576	AIGIKEAnQTQL	PANRLREEHIRVYAIGIKEANQTQLREIAGEEKRVYYVHDF	Liver	2014	33
Reviewed	A6NMZ7	COL6A6	Collagen alpha-6(VI) chain	576	AIGIKEAnQTQLREIAGEEKRVY	PANRLREEHIRVYAIGIKEANQTQLREIAGEEKRVYYVHDF	Liver	2014	33
Reviewed	A6NMZ7	COL6A6	Collagen alpha-6(VI) chain	761	VGVFGSnVTQLEE	PAVVLRQEGVIIYSVGVFGSNVTQLEEISGRPEMVFYVENF	Liver	2014	33
Reviewed	A6NMZ7	COL6A6	Collagen alpha-6(VI) chain	761	SVGVFGSnVTQLEE	PAVVLRQEGVIIYSVGVFGSNVTQLEEISGRPEMVFYVENF	Liver	2014	33
Reviewed	A6NMZ7	COL6A6	Collagen alpha-6(VI) chain	761	GSnVTQLEEISGRPEMVF	PAVVLRQEGVIIYSVGVFGSNVTQLEEISGRPEMVFYVENF	Liver	2014	33
Reviewed	A6NMZ7	COL6A6	Collagen alpha-6(VI) chain	761	GSnVTQLEEISGRPEMVFY	PAVVLRQEGVIIYSVGVFGSNVTQLEEISGRPEMVFYVENF	Liver	2014	33
Reviewed	A6NMZ7	COL6A6	Collagen alpha-6(VI) chain	761	SVGVFGSnVTQLEEISGRPEMVF	PAVVLRQEGVIIYSVGVFGSNVTQLEEISGRPEMVFYVENF	Liver	2014	33
Reviewed	A6NMZ7	COL6A6	Collagen alpha-6(VI) chain	930	LnATAK	GVPQVLIVITDGESHDADKLNATAKALRDKGILVLAVGIDG	Breast cancer xenografts	2015	Unpublished
Reviewed	A6NMZ7	COL6A6	Collagen alpha-6(VI) chain	930	SHDADKLnATAK	GVPQVLIVITDGESHDADKLNATAKALRDKGILVLAVGIDG	Liver	2014	33
Reviewed	A6NMZ7	COL6A6	Collagen alpha-6(VI) chain	930	IVITDGESHDADKLnATAK	GVPQVLIVITDGESHDADKLNATAKALRDKGILVLAVGIDG	Liver	2014	33
Reviewed	A6NMZ7	COL6A6	Collagen alpha-6(VI) chain	930	GVPQVLIVITDGESHDADKLnATAK	GVPQVLIVITDGESHDADKLNATAKALRDKGILVLAVGIDG	Liver;Liver;Ovarian tumor	2009;2014;2015	64;33;Unpublished
Reviewed	A6NMZ7	COL6A6	Collagen alpha-6(VI) chain	988	GIFSDVTASVCnSSK	FVETFGGLKGIFSDVTASVCNSSKVDCEIDKVDLVFLMDGS	Liver;Pancreatic islets;Liver tumor (HCC);Liver;Liver;Ovarian tumor	2009;2012;2014;2014;2014;2015	64;48;32;32;33;Unpublished
Reviewed	A6NMZ7	COL6A6	Collagen alpha-6(VI) chain	1290	LWDTFQnKS	VKGPSLLNANLLDSLWDTFQNKSAARGKVVLLFSDGLDDDV	Liver	2009	64
Reviewed	A6NMZ7	COL6A6	Collagen alpha-6(VI) chain	1290	LLDSLWDTFQnK	VKGPSLLNANLLDSLWDTFQNKSAARGKVVLLFSDGLDDDV	Ovarian tumor	2015	Unpublished
Reviewed	A6NMZ7	COL6A6	Collagen alpha-6(VI) chain	1290	WDTFQnKSAARGKVVL	VKGPSLLNANLLDSLWDTFQNKSAARGKVVLLFSDGLDDDV	Liver	2009	64
Reviewed	A6NMZ7	COL6A6	Collagen alpha-6(VI) chain	1290	GPSLLNANLLDSLWDTFQnK	VKGPSLLNANLLDSLWDTFQNKSAARGKVVLLFSDGLDDDV	Liver;Liver;Ovarian tumor	2009;2014;2015	64;33;Unpublished
Reviewed	A6NMZ7	COL6A6	Collagen alpha-6(VI) chain	2034	FnLTTYR	SHAPPDFLPNTQKSPVRAEFNLTTYRSKRLMKRHVHESVKQ	Liver	2014	33
Reviewed	A6NMZ7	COL6A6	Collagen alpha-6(VI) chain	2034	AEFnLTTYR	SHAPPDFLPNTQKSPVRAEFNLTTYRSKRLMKRHVHESVKQ	Pancreatic islets;Liver;Ovarian tumor;Urine;Urine	2012;2014;2015;2015;2015;	48;33;Unpublished;Unpublished;Unpublished;Unpublished
Reviewed	A6NMZ7	COL6A6	Collagen alpha-6(VI) chain	2034	SPVRAEFnLTTYR	SHAPPDFLPNTQKSPVRAEFNLTTYRSKRLMKRHVHESVKQ	Liver	2014	33
Reviewed	A6NN14	ZNF729	Zinc finger protein 729	1031	nFSALMKHK	KLIHTREKLYKCEECVKAFNNFSALMKHKIIHTGEKPYKCE	OVCAR-3 cell line (Ovarian cancer)	2015	1
Reviewed	A6NNS2	DHRS7C	Dehydrogenase/reductase SDR family member 7C	127	nASVKVK	VPDVAKEVLDCYGCVDILINNASVKVKGPAHKISLELDKKI	OVCAR-3 cell line (Ovarian cancer)	2015	1
Reviewed	A6NNZ2	NULL	Tubulin beta-8 chain-like protein LOC260334	184	VSDTVVEPYnATLSVH	INTFSILPSPKVSDTVVEPYNATLSVHQLIENADETFCIDN	Prostate tumor;Ovarian tumor	2007;2007	Unpublished;Unpublished
Reviewed	A6QL64	ANKRD36	Ankyrin repeat domain-containing protein 36A	1606	YSGQLAALTDEnTTLR	ETLAKTIACYSGQLAALTDENTTLRSKLEKQRESRQRLETE	Urine;Urine;Prostate tumor	2007;2007;2007	Unpublished;Unpublished
Reviewed	A6XGL0	YJEFN3	YjeF N-terminal domain-containing protein 3	39	AELSSnATTSLVQRR	LRALELQPPLADMGRAELSSNATTSLVQRRKQAWGRQSWLE	Urine	2007	Unpublished
Reviewed	A7E2F4	GOLGA8A	Golgin subfamily A member 8A	117	LnDTLK	SPCQEQAAVLNSRSIKISRLNDTIKSLKQQKKQVEHQLEEE	Urine;Urine;Prostate tumor	2007;2007;2007	Unpublished;Unpublished
Reviewed	A7E2V4	ZSWIM8	Zinc finger SWIM domain-containing protein 8	128	nGSADEFQR	IAFWSFPENEEDIRLYSCLANGSADEFQRGDQLFRMRAVKD	OVCAR-3 cell line (Ovarian cancer)	2015	1
Reviewed	A7KAX9	ARHGAP32	Rho GTPase-activating protein 32	928	nTTAQNASSSTWDK	SEPISVTLPPRVSEVIGTVSNTTAQNASSSTWDKCVEERDA	OVCAR-3 cell line (Ovarian cancer)	2015	1
Reviewed	A7KAX9	ARHGAP32	Rho GTPase-activating protein 32	933	NTTAQnASSSTWDK	VTLPPRVSEVIGTVSNTTAQNASSSTWDKCVEERDATNRSP	OVCAR-3 cell line (Ovarian cancer)	2015	1
Reviewed	A7KAX9	ARHGAP32	Rho GTPase-activating protein 32	1083	RPGTSQAGYTNYGDIAVATTEDnLSSSYSAVALDK	GTSQAGYTNYGDIAVATTEDNLSSSYSAVALDKAYFQTDRP	Serum	2015	Unpublished
Reviewed	A7MBM2	DISP2	Protein dispatched homolog 2	792	SnSSIVRDPAFSASGPEAQR	VVLVWGVLPVDTGDPLDPRSNSSLVRDPAFSASGPEAQRWL	DLBCL cell lines (Diffuse large B-cell lymphoma)	2014	16
Reviewed	A7MBM2	DISP2	Protein dispatched homolog 2	792	SnSSLVRDPAFSASGPEAQR	VVLVWGVLPVDTGDPLDPRSNSSLVRDPAFSASGPEAQRWL	Non-small Cell Lung Carcinoma	2014	18
Reviewed	A8K0Z3	WASH1	WAS protein family homolog 1	177	FnTTENLYKK	EEGLGGLPSNISSVSSLLLFNTTENLYKKYVFLDPLAGAVT	Urine	2007	Unpublished
Reviewed	A8K2U0	A2ML1	Alpha-2-macroglobulin-like protein 1	104	VSGVGNnISFEEK	PPPAGGTEEVATIRVSGVGNNISFEEKKKVLIQRQGNGTFV	Urine;Breast cell lines;Urine;Prostate tumor	2007;2012;2007;2007	52;Unpublished;Unpublished
Reviewed	A8K2U0	A2ML1	Alpha-2-macroglobulin-like protein 1	120	IIQRQGnGTFVQT	GVGNNISFEEKKKVLIQRQGNGTFVQTDKPLYTPGQQVYFR	Breast Cancer cell lines	2013	37
Reviewed	A8K2U0	A2ML1	Alpha-2-macroglobulin-like protein 1	120	QGnGTFVQTDKPLYTPGQQVYFR	GVGNNISFEEKKKVLIQRQGNGTFVQTDKPLYTPGQQVYFR	Urine;Breast cell lines;Ovarian tumor;Urine;Prostate tumor	2007;2012;2015;2007;2007	52;Unpublished;Unpublished
Reviewed	A8K2U0	A2ML1	Alpha-2-macroglobulin-like protein 1	281	nLSGQTDK	KANTYWYREVEREQLPDKCRNLSGQTDKTGCFSAPVDMATF	Ovarian tumor	2015	Unpublished
Reviewed	A8K2U0	A2ML1	Alpha-2-macroglobulin-like protein 1	281	CRnLSGQTDK	KANTYWYREVEREQLPDKCRNLSGQTDKTGCFSAPVDMATF	Serum (HCC)	2013	38
Reviewed	A8K2U0	A2ML1	Alpha-2-macroglobulin-like protein 1	409	ETSGWnGTDVSLEGK	QTLVTDNNGLAPFTLETSGWNGTDVSLEGKFQMEDLVYNPE	Urine;Urine;Prostate tumor	2007;2007;2007	Unpublished;Unpublished
Reviewed	A8K2U0	A2ML1	Alpha-2-macroglobulin-like protein 1	409	TLETSGWnGTDVSLEGK	QTLVTDNNGLAPFTLETSGWNGTDVSLEGKFQMEDLVYNPE	Ovarian tumor	2015	Unpublished
Reviewed	A8K2U0	A2ML1	Alpha-2-macroglobulin-like protein 1	857	THHWnITAVK	WADSQTSSCLCADDAKTHHWNITAVKLGHINFTISTKILDS	Urine;Breast cell lines;Ovarian tumor;Breast cancer xenografts;Urine;Serum;Prostate tumor;Breast tumor;Breast cancer cell lines	2007;2012;2015;2015;2007;2007;2007;2007;2007	52;Unpublished;Unpublished;Unpublished;Unpublished;Unpublished
Reviewed	A8K2U0	A2ML1	Alpha-2-macroglobulin-like protein 1	857	AKTHHWnITAVKI	WADSQTSSCLCADDAKTHHWNITAVKLGHINFTISTKILDS	Breast Cancer cell lines	2013	37
Reviewed	A8K2U0	A2ML1	Alpha-2-macroglobulin-like protein 1	867	HInFTISTK	CADDAKTHHWNITAVKLGHINFTISTKILDSNEPCGGQKGF	Urine;Urine;Prostate tumor	2007;2007;2007	Unpublished;Unpublished
Reviewed	A8K2U0	A2ML1	Alpha-2-macroglobulin-like protein 1	867	LGHInFTISTK	CADDAKTHHWNITAVKLGHINFTISTKILDSNEPCGGQKGF	Ovarian tumor;Breast cancer xenografts	2015;2015	Unpublished;Unpublished
Reviewed	A8K2U0	A2ML1	Alpha-2-macroglobulin-like protein 1	867	VKIGHInFTISTK	CADDAKTHHWNITAVKLGHINFTISTKILDSNEPCGGQKGF	Breast Cancer cell lines	2013	37
Reviewed	A8K2U0	A2ML1	Alpha-2-macroglobulin-like protein 1	1020	HSnGSYSAFGER	SRAVGFLEIGYQKELMYKHSNGSYSAFGERDGNGNTWLTAF	Urine;Saliva;Prostate;Ovarian tumor;Breast cancer xenografts;Urine;Urine;Urine;Serum;Prostate tumor;Breast tumor;Breast cancer cell lines	2007;2011;2014;2015;2015;2015;2015;2007;2007;2007;2007;2007	56;14;Unpublished;Unpublished;Unpublished;Unpublished;Unpublished
Reviewed	A8K2U0	A2ML1	Alpha-2-macroglobulin-like protein 1	1020	IMYKHSnGSYSAF	SRAVGFLEIGYQKELMYKHSNGSYSAFGERDGNGNTWLTAF	Breast Cancer cell lines	2013	37
Reviewed	A8K7I4	CLCA1	Calcium-activated chloride channel regulator 1	503	GLTLQNSQWMnGTVIVDSTVGK	SQRSIQLESKGLTLQNSQWMNGTVIVDSTVGKDTLFLITWT	Colorectal tumor;Ovarian tumor	2014;2015	22;Unpublished
Reviewed	A8K7I4	CLCA1	Calcium-activated chloride channel regulator 1	585	ASnATLPPITVTSK	KYSLQASSQTLTLTVTSRASNATLPPITVTSKTNKDTSKFP	ovarian tumor;Colorectal tumor;Ovarian tumor;Prostate tumor;Ovarian tumor	2011;2014;2015;2007;2007	54;22;Unpublished;Unpublished
Reviewed	A8K7I4	CLCA1	Calcium-activated chloride channel regulator 1	770	AEIHGGSLInLTWTAPGDDYDHGTAHK	LFPPGQITDLKAEIHGGSLINLTWTAPGDDYDHGTAHKYII	Ovarian tumor	2015	Unpublished
Reviewed	A8K7I4	CLCA1	Calcium-activated chloride channel regulator 1	804	DKFnESLQVNTTALIPK	TAHKYIIRISTSILDLRDKFNESLQVNTTALIPKEANSEEV	Colorectal tumor	2014	22
Reviewed	A8K7I4	CLCA1	Calcium-activated chloride channel regulator 1	810	DKFNESLQVnTTALIPK	IRISTSILDLRDKFNESLQVNTTALIPKEANSEEVFLFKPE	Colorectal tumor	2014	22
Reviewed	A8K7I4	CLCA1	Calcium-activated chloride channel regulator 1	890	IHInSTIPGIHILK	TPPETPSPDETSAPCPNIHINSTIPGIHILKIMWKWIGELQ	Ovarian tumor	2015	Unpublished
Reviewed	A8MPS7	YDJC	Carbohydrate deacetylase	65	HSIPTGLHAnLSEGR	ATESAAELARRHSIPTGLHANLSEGRPVGPARRGASSLLGP	Prostate tumor;Cerebrospinal fluid	2007;2007	Unpublished;Unpublished
Reviewed	A8MPX8	PP2D1	Protein phosphatase 2C-like domain-containing protein 1	613	DnITVMVIFLNGSEYQLLT	AAEYVSHELVNAALLAGSRDNITVMVIFLNGSEYQLLT---	Serum	2015	10
Reviewed	A8MPX8	PP2D1	Protein phosphatase 2C-like domain-containing protein 1	622	DNITVMVIFLnGSEYQLLT	VNAALLAGSRDNITVMVIFLNGSEYQLLT------------	Serum	2015	10
Reviewed	A8MQT2	GOLGA8B	Golgin subfamily A member 8B	89	LnDTLK	SPCQEQAAVLNSRSIKISRLNDTIKSLKQQKKQVEHQLEEE	Urine;Urine;Prostate tumor	2007;2007;2007	Unpublished;Unpublished
Reviewed	A8MTB9	CEACAM18	Carcinoembryonic antigen-related cell adhesion molecule 18	112	TGnYTVRVVAGNE	ERVNREGSLLIRPTALNDTGNYTVRVVAGNETQRATGWLEV	Liver	2014	33
Reviewed	A8MTB9	CEACAM18	Carcinoembryonic antigen-related cell adhesion molecule 18	121	TGNYTVRVVAGnE	LIRPTALNDTGNYTVRVVAGNETQRATGWLEVLELGSNLGI	Liver	2014	33
Reviewed	A8MTB9	CEACAM18	Carcinoembryonic antigen-related cell adhesion molecule 18	270	nGSLLNFSDAKM	QVEMECICYSFLDLKYHWIHNGSLLNFSDAKMNLSSLAWEQ	OVCAR-3 cell line (Ovarian cancer)	2015	1
Reviewed	A8MTB9	CEACAM18	Carcinoembryonic antigen-related cell adhesion molecule 18	275	NGSLLnFSDAKM	CICYSFLDLKYHWIHNGSLLNFSDAKMNLSSLAWEQMGRYR	OVCAR-3 cell line (Ovarian cancer)	2015	1
Reviewed	A8MTJ6	FOXI3	Forkhead box protein I3	196	nLSLNDCFKK	ADSFPFYQRSKAGWQNSIRHNLSLNDCFKKVPRDEDDPGKG	OVCAR-3 cell line (Ovarian cancer)	2015	1
Reviewed	A8MTJ6	FOXI3	Forkhead box protein I3	196	nLSLNDCFKKVPR	ADSFPFYQRSKAGWQNSIRHNLSLNDCFKKVPRDEDDPGKG	OVCAR-3 cell line (Ovarian cancer)	2015	1
Reviewed	A8MTJ6	FOXI3	Forkhead box protein I3	246	SEASnGSTVAAGTSKSEEGLSSGLGSGVGGK	EKMFDNGNFRRKRKRRSEASNGSTVAAGTSKSEEGLSSGLG	Serum;Prostate tumor	2007;2007	Unpublished;Unpublished
Reviewed	A8MU46	SMTNL1	Smoothelin-like protein 1	401	RHnFTLAFSTAEK	HKFFPDAFDYAELDPAKRRHNFTLAFSTAEKLADCAQLLDV	Urine	2007	Unpublished
Reviewed	A8MUK1	USP17L5	Ubiquitin carboxyl-terminal hydrolase 17-like protein 5	444	FLQEQnK	LVERATQESTLDHWKFLQEQNKTKPEFNVRKVEGTLPPDVL	Liver	2014	33
Reviewed	A8MV57	MPTX1	Putative mucosal pentraxin homolog	32	SPYASTHVnVSWESASGIATLWANGK	AVTFNGPTPCPRSPYASTHVNVSWESASGIATLWANGKLVG	Prostate tumor	2007	Unpublished
Reviewed	A8MVS5	HIDE1	Protein HIDE1	48	IVPPYPSSQEDPIHIACMAPGNFPGAnFTIYR	SSQEDPIHIACMAPGNFPGANFTLYRGGQVVQLLQAPTDQR	Spermatozoa	2013	43
Reviewed	A8MVS5	HIDE1	Protein HIDE1	73	GVTFnISGGSSK	RGGQVVQLLQAPTDQRGVTFNLSGGSSKAPGGPFHCQYGVL	DLBCL cell lines (Diffuse large B-cell lymphoma)	2014	16
Reviewed	A8MVS5	HIDE1	Protein HIDE1	73	GVTFnLSGGSSK	RGGQVVQLLQAPTDQRGVTFNLSGGSSKAPGGPFHCQYGVL	Colorectal tumor;Liver;Breast cancer xenografts;Urine;Urine;Urine	2014;2014;2015;2015;2015;2015;	22;33;Unpublished;Unpublished;Unpublished;Unpublished;Unpublished
Reviewed	A8MVW0	FAM171A2	Protein FAM171A2	66	ASVDVFGnR	QVYVSGELVPLARASVDVFGNRTLLAAGTTDSEGVATLPLS	HEK293 cell line (embryonic kidney);DLBCL cell lines (Diffuse large B-cell lymphoma);Non-small Cell Lung Carcinoma;Liver;OVCAR-3 cell line (Ovarian cancer);Breast cancer xenografts;Prostate tumor;Lymphocytes	2014;2014;2014;2014;2015;2015;2007;2007	15;16;18;33;1;Unpublished;Unpublished
Reviewed	A8MVW0	FAM171A2	Protein FAM171A2	66	SVDVFGnRTIIAA	QVYVSGELVPLARASVDVFGNRTLLAAGTTDSEGVATLPLS	Breast Cancer cell lines	2013	37
Reviewed	A8MVW0	FAM171A2	Protein FAM171A2	221	LLTGnGTEVPLSGPIHLSLPVPSETR	NGSWLELMPLTAVSVHLLTGNGTEVPLSGPIHLSLPVPSET	Prostate tumor;Lymphocytes	2007;2007	Unpublished;Unpublished
Reviewed	A8MVW0	FAM171A2	Protein FAM171A2	265	nGTGVIR	TVGTSIPAWRFDPKSGLWVRNGTGVIRKEGRQLYWTFVSPQ	Ovarian tumor	2015	Unpublished
Reviewed	A8MVW0	FAM171A2	Protein FAM171A2	265	FDPKSGLWVRnGTGVIR	TVGTSIPAWRFDPKSGLWVRNGTGVIRKEGRQLYWTFVSPQ	Pancreatic islets	2012	48
Reviewed	A8MVW5	HEPACAM2	HEPACAM family member 2	85	YLLGSVnK	QIIWLFERPHTMPKYLLGSVNKSVVPDLEYQHKFTMMPPNA	Pancreatic islets;Prostate;Urine;Urine;Urine	2012;2014;2015;2015;2015;	48;14;Unpublished;Unpublished;Unpublished;Unpublished
Reviewed	A8MVW5	HEPACAM2	HEPACAM family member 2	104	FTMMPPnASLLINPLQFPDEGNYIVK	VNKSVVPDLEYQHKFTMMPPNASLLINPLQFPDEGNYIVKV	Urine;Urine;Prostate tumor	2007;2007;2007	Unpublished;Unpublished
Reviewed	A8MVW5	HEPACAM2	HEPACAM family member 2	129	VNIQGnGTLSASQK	INPLQFPDEGNYIVKVNIQGNGTLSASQKIQVTVDDPVTKP	Urine;Pancreatic islets;Colorectal tumor;Urine;Urine;Urine;Prostate tumor	2007;2012;2014;2015;2015;2007;2007	48;22;Unpublished;Unpublished
Reviewed	A8MVW5	HEPACAM2	HEPACAM family member 2	201	NGRPVHTSSTYSFSPQnNTLHIAPVTK	QWLKNGRPVHTSSTYSFSPQNNTLHIAPVTKEDIGNYSCLV	Urine;Urine;Urine;Prostate tumor	2007;2013;2007;2007	45;Unpublished;Unpublished
Reviewed	A8MVW5	HEPACAM2	HEPACAM family member 2	216	EDIGnYSCLVR	SFSPQNNTLHIAPVTKEDIGNYSCLVRNPVSEMESDIIMPI	Pancreatic islets;Non-small Cell Lung Carcinoma;Urine;Urine;Urine	2012;2014;2015;2015;2015;	48;18;Unpublished;Unpublished;Unpublished;Unpublished
Reviewed	A8MVW5	HEPACAM2	HEPACAM family member 2	288	TDnTTYIIK	FDCSADSHPPNTYSWIRRTDNTTYIIKHGPRLEVASEKVAQ	Urine;Urine	2015;2015;	Unpublished;Unpublished;Unpublished
Reviewed	A8MVW5	HEPACAM2	HEPACAM family member 2	288	RTDnTTYIIK	FDCSADSHPPNTYSWIRRTDNTTYIIKHGPRLEVASEKVAQ	Pancreatic islets;HuH-7 cell line (Liver);Non-small Cell Lung Carcinoma;Urine;Urine	2012;2013;2014;2015;2015;	48;38;18;Unpublished;Unpublished;Unpublished
Reviewed	A8MVW5	HEPACAM2	HEPACAM family member 2	320	TMDYVCCAYNnITGR	EVASEKVAQKTMDYVCCAYNNITGRQDETHFTVIITSVGLE	Non-small Cell Lung Carcinoma	2014	18
Reviewed	A8MW99	MEI4	Meiosis-specific protein MEI4-like	162	nLTESGNLK	ILQNPLSSHMQFLQYLLELKNLTESGNLKRDLTHFEKDSST	Prostate tumor;Ovarian tumor	2007;2007	Unpublished;Unpublished
Reviewed	A8MWS1	KIR3DP1	Putative killer cell immunoglobulin-like receptor like protein KIR3DP1	273	VnGTFQANFPLGPATHGGTYR	YHLSREGEAHELRFPAVPKVNGTFQANFPLGPATHGGTYRC	Urine;Urine;Urine;Urine;Prostate tumor	2007;2015;2015;2007;2007	Unpublished;Unpublished
Reviewed	A8MWX3	WASH4P	Putative WAS protein family homolog 4	190	FnTTENLYKK	EEGLGGLPSNISSVSSLLLFNTTENLYKKYVFLDPLAGAVT	Urine	2007	Unpublished
Reviewed	A8MWY0	KIAA1324L	UPF0577 protein KIAA1324-like	405	nGSSSCHPCPPGTFSDGTK	RLPPSGEKKDCPPCNPGFYNNGSSSCHPCPPGTFSDGTKEC	OVCAR-3 cell line (Ovarian cancer)	2015	1
Reviewed	A8MWY0	KIAA1324L	UPF0577 protein KIAA1324-like	405	DCPPCNPGFYNnGSSSCHPCPPGTFSDGTK	RLPPSGEKKDCPPCNPGFYNNGSSSCHPCPPGTFSDGTKEC	Pancreatic islets	2012	48
Reviewed	A8MWY0	KIAA1324L	UPF0577 protein KIAA1324-like	682	EnQSLHYDFSNLSSVGSLMNGPSFTSK	KNNQDHSVCYSDCFFYHEKENQSLHYDFSNLSSVGSLMNGP	K562A cell line (Leukemia)	2014	25
Reviewed	A8MWY0	KIAA1324L	UPF0577 protein KIAA1324-like	691	ENQSLHYDFSnLSSVGSLMNGPSFTSK	YSDCFFYHEKENQSLHYDFSNLSSVGSLMNGPSFTSKGTKY	K562A cell line (Leukemia)	2014	25
Reviewed	A8MWY0	KIAA1324L	UPF0577 protein KIAA1324-like	716	nISLCGHEGK	GSLMNGPSFTSKGTKYFHFFNISLCGHEGKKMALCTNNITD	OVCAR-3 cell line (Ovarian cancer)	2015	1
Reviewed	A8MWY0	KIAA1324L	UPF0577 protein KIAA1324-like	716	YFHFFnISICGHEGK	GSLMNGPSFTSKGTKYFHFFNISLCGHEGKKMALCTNNITD	DLBCL cell lines (Diffuse large B-cell lymphoma)	2014	16
Reviewed	A8MWY0	KIAA1324L	UPF0577 protein KIAA1324-like	733	MAICTNnITDFTVK	HFFNISLCGHEGKKMALCTNNITDFTVKEIVAGSDDYTNLV	DLBCL cell lines (Diffuse large B-cell lymphoma)	2014	16
Reviewed	A8MWY0	KIAA1324L	UPF0577 protein KIAA1324-like	733	MALCTNnITDFTVK	HFFNISLCGHEGKKMALCTNNITDFTVKEIVAGSDDYTNLV	Jurkat T cell line	2014	13
Reviewed	A8MXK1	VSTM5	V-set and transmembrane domain-containing protein 5	44	TInATVK	AAARCLQSQGVSLYIPQATINATVKEDILLSVEYSCHGVPT	Prostate tumor;Ovarian tumor	2007;2007	Unpublished;Unpublished
Reviewed	A8MYU2	KCNU1	Potassium channel subfamily U member 1	8	IRnETWEDIPK	-------------MFQTKLRNETWEDLPKMSCTTEIQAAFI	Spermatozoa	2013	43
Reviewed	A8MZF0	PRR33	Proline-rich protein 33	322	FnRTATGWRL	TRPPPTVRSILELSPQPKNFNRTATGWRLQ-----------	Prostate tumor	2007	Unpublished
Reviewed	A8TX70	COL6A5	Collagen alpha-5(VI) chain	1074	TQIQnVSK	QSIIELKNSLTKTQWKTQIQNVSKSGGFPRIDFALKKVSNM	Ovarian tumor	2015	Unpublished
Reviewed	B0FP48	UPK3BL	Uroplakin-3b-like protein	51	VAAPEHISYVPQLSnDTLAGR	VQPGTDVAAPEHISYVPQLSNDTLAGRLTLSTFTLEQPLGQ	Ovarian tumor	2015	Unpublished
Reviewed	B0FP48	UPK3BL	Uroplakin-3b-like protein	51	VQPGTDVAAPEHISYVPQLSnDTLAGR	VQPGTDVAAPEHISYVPQLSNDTLAGRLTLSTFTLEQPLGQ	Breast cancer xenografts	2015	Unpublished
Reviewed	B0FP48	UPK3BL	Uroplakin-3b-like protein	91	nATQSFTAPR	QFSSHNISDLDTIWLVVALSNATQSFTAPRTNQDIPAPANF	OVCAR-3 cell line (Ovarian cancer)	2015	1
Reviewed	B0FP48	UPK3BL	Uroplakin-3b-like protein	110	TNQDIPAPAnFSQR	SNATQSFTAPRTNQDIPAPANFSQRGYYLTLRANRVLYQTR	Ovarian tumor;OVCAR-3 cell line (Ovarian cancer);Breast cancer xenografts;Urine;Urine;Urine;Prostate tumor;Ovarian tumor;Ovarian cancer cell lines	2015;2015;2015;2015;2015;2015;2007;2007;2007	1;Unpublished;Unpublished;Unpublished
Reviewed	B0FP48	UPK3BL	Uroplakin-3b-like protein	140	VGnDTHCQPTK	LRANRVLYQTRGQLHVLRVGNDTHCQPTKIGCNHPLPGPGP	Ovarian tumor	2015	Unpublished
Reviewed	B0I1T2	MYO1G	Unconventional myosin-Ig	229	NPAVYnFTHQGAGLNMTVHSALDSDEQSHQAVTEAMR	RGSEDKQLHELHLERNPAVYNFTHQGAGLNMTVHSALDSDE	Serum	2015	Unpublished
Reviewed	B0I1T2	MYO1G	Unconventional myosin-Ig	238	NPAVYNFTHQGAGLnMTVHSALDSDEQSHQAVTEAMR	ELHLERNPAVYNFTHQGAGLNMTVHSALDSDEQSHQAVTEA	Serum	2015	Unpublished
Reviewed	B1AJZ9	FHAD1	Forkhead-associated domain-containing protein 1	1261	DMSKTLGSLMNIKnMSGHVSMK	LSEKLYLDMSKTLGSLMNIKNMSGHVSMKYLSRQEREKVNQ	Urine;Urine;Prostate tumor	2007;2007;2007	Unpublished;Unpublished
Reviewed	B1APH4	ZNF487	Putative zinc finger protein 487	176	KIRGNCDSSGMNLNnISELIISNRSSFVR	NPILSRKIRGNCDSSGMNLNNISELIISNRSSFVRNPAECN	Serum;Prostate tumor	2007;2007	Unpublished;Unpublished
Reviewed	B1APH4	ZNF487	Putative zinc finger protein 487	184	KIRGNCDSSGMNLNNISELIISnRSSFVR	RGNCDSSGMNLNNISELIISNRSSFVRNPAECNVRGKFLLC	Serum;Prostate tumor	2007;2007	Unpublished;Unpublished
Reviewed	B2RPK0	HMGB1P1	Putative high mobility group protein B1-like 1	134	nNTAADDK	KGEHPGLSIGDVAKKLGEMWNNTAADDKQPGEKKAAKLKEK	OVCAR-3 cell line (Ovarian cancer)	2015	1
Reviewed	B2RTY4	MYO9A	Unconventional myosin-IXa	826	DGIFAnSTSSK	IRQSRLSSGTSLLDKDGIFANSTSSKLLERAHGILTRNKNF	Urine;Urine	2015;2015;	Unpublished;Unpublished;Unpublished
Reviewed	B2RTY4	MYO9A	Unconventional myosin-IXa	1852	ISNVALDSMHWQnDSVQ	AKRKRSVKISNVALDSMHWQNDSVQIIASVSDLKSMDEFLL	Serum;Prostate tumor	2007;2007	Unpublished;Unpublished
Reviewed	B2RU33	POTEC	POTE ankyrin domain family member C	240	AVQCQEDECVLMLLEHGADQNIPDEYGnTTLHYAVHNEDK	ECVLMLLEHGADQNIPDEYGNTTLHYAVHNEDKLMAKALLL	Serum	2015	Unpublished
Reviewed	B2RV13	C17orf105	Uncharacterized protein C17orf105	2	nNSLDYLAYPVIVSNHRQSTTFRK	-------------------MNNSLDYLAYPVIVSNHRQSTT	Prostate tumor	2007	Unpublished
Reviewed	B2RXH2	KDM4E	Lysine-specific demethylase 4E	10	MKSVHSSPQnT	-----------MKSVHSSPQNTSHTIMTFYPTMEEFADFNT	Sample information lost	2007	Unpublished
Reviewed	B5MD39	GGTLC3	Putative gamma-glutamyltransferase light chain 3	167	PnVTTVER	FGYDVKRAVEEPRLHNKLLPNVTTVERNIDQAVTAALETRH	Pancreatic islets;Prostate	2012;2014	48;14
Reviewed	B5MD39	GGTLC3	Putative gamma-glutamyltransferase light chain 3	167	LHNKLLPnVT	FGYDVKRAVEEPRLHNKLLPNVTTVERNIDQAVTAALETRH	Liver	2014	33
Reviewed	B5MD39	GGTLC3	Putative gamma-glutamyltransferase light chain 3	167	LLPnVTTVER	FGYDVKRAVEEPRLHNKLLPNVTTVERNIDQAVTAALETRH	Urine;Urine	2015;2015;	Unpublished;Unpublished;Unpublished
Reviewed	B5MD39	GGTLC3	Putative gamma-glutamyltransferase light chain 3	167	LHNKLLPnVTTVER	FGYDVKRAVEEPRLHNKLLPNVTTVERNIDQAVTAALETRH	Urine;Liver;Breast cell lines;Prostate;Colorectal tumor;Liver;Prostate tumor;Urine;Urine;Hela cell line (cervical cancer);Urine;Prostate tumor;Breast tumor;Breast cancer cell lines	2007;2009;2012;2014;2014;2014;2015;2015;2015;2015;2007;2007;2007;2007	64;52;14;22;33;12;Unpublished;Unpublished;Unpublished;Unpublished
Reviewed	B6SEH8	ERVV-1	Endogenous retrovirus group V member 1 Env polyprotein	312	GIGVTIYnTTQPR	HTGECAVGLLGPRGIGVTIYNTTQPRQKRALGLILAGMGAA	Breast cancer xenografts	2015	Unpublished
Reviewed	B6SEH9	ERVV-2	Endogenous retrovirus group V member 2 Env polyprotein	312	GIGVTIYnTTQPR	HTGECAVGLLGPRGIGVTIYNTTQPRQKRALGLILAGMGAA	Breast cancer xenografts	2015	Unpublished
Reviewed	C9J2P7	USP17L15	Ubiquitin carboxyl-terminal hydrolase 17-like protein 15	444	FLQEQnK	LVERATQESTLDHWKFLQEQNKTKPEFNVRKVEGTLPPDVL	Liver	2014	33
Reviewed	C9J798	RASA4B	Ras GTPase-activating protein 4B	151	DRnGTSDPFVR	RACRLRCSVLEARDLAPKDRNGTSDPFVRVRYKGRTRETSI	Urine;Urine	2015;2015;	Unpublished;Unpublished;Unpublished
Reviewed	C9JJH3	USP17L10	Ubiquitin carboxyl-terminal hydrolase 17-like protein 10	444	FLQEQnK	LVERATQESTLDHWKFLQEQNKTKPEFNVRRVEGTVPPDVL	Liver	2014	33
Reviewed	C9JLJ4	USP17L13	Ubiquitin carboxyl-terminal hydrolase 17-like protein 13	444	FLQEQnK	LVERATQESTLDRWKFLQEQNKTKPEFNVRKVEGTLPPDVL	Liver	2014	33
Reviewed	C9JPN9	USP17L12	Ubiquitin carboxyl-terminal hydrolase 17-like protein 12	444	FLQEQnK	LVERATQESTLDHWKFLQEQNKTKPEFNVRKVEGTLPPDVL	Liver	2014	33
Reviewed	C9JVI0	USP17L11	Ubiquitin carboxyl-terminal hydrolase 17-like protein 11	444	FLQEQnK	LVERATQESTLDHWKFLQEQNKTKPEFNVRKVEGTLPPDVL	Liver	2014	33
Reviewed	D6R901	USP17L21	Ubiquitin carboxyl-terminal hydrolase 17-like protein 21	444	FLQEQnK	LVERATQESTLDHWKFLQEQNKTKPEFNVRKVEGTLPPDVL	Liver	2014	33
Reviewed	D6R9N7	USP17L18	Ubiquitin carboxyl-terminal hydrolase 17-like protein 18	444	FLQEQnK	LVERATQESTLDHWKFLQEQNKTKPEFNVRKVEGTLPPDVL	Liver	2014	33
Reviewed	D6RA61	USP17L22	Ubiquitin carboxyl-terminal hydrolase 17-like protein 22	444	FLQEQnK	LVERATQESTLDHWKFLQEQNKTKPEFNVRKVEGTLPPDVL	Liver	2014	33
Reviewed	D6RBQ6	USP17L17	Ubiquitin carboxyl-terminal hydrolase 17-like protein 17	444	FLQEQnK	LVERATQESTLDHWKFLQEQNKTKPEFNVRKVEGTLPPDVL	Liver	2014	33
Reviewed	D6RCP7	USP17L19	Ubiquitin carboxyl-terminal hydrolase 17-like protein 19	444	FLQEQnK	LVERATQESTLDHWKFLQEQNKTKPEFNVRKVEGTLPPDVL	Liver	2014	33
Reviewed	D6RJB6	USP17L20	Ubiquitin carboxyl-terminal hydrolase 17-like protein 20	444	FLQEQnK	LVERATQESTLDHWKFLQEQNKTKPEFNVRKVEGTLPPDVL	Liver	2014	33
Reviewed	E9PAV3	NACA	Nascent polypeptide-associated complex subunit alpha, muscle-specific form	2052	LVMSQAnVSR	EEVDETGVEVKDIELVMSQANVSRAKAVRALKNNSNDIVNA	Urine;Urine	2015;2015;	Unpublished;Unpublished;Unpublished
Reviewed	E9PAV3	NACA	Nascent polypeptide-associated complex subunit alpha, muscle-specific form	2052	DIELVMSQAnVSR	EEVDETGVEVKDIELVMSQANVSRAKAVRALKNNSNDIVNA	Urine;Urine;Urine	2015;2015;2015;	Unpublished;Unpublished;Unpublished;Unpublished
Reviewed	F2Z333	C1orf233	Fibronectin type-III domain-containing transmembrane protein C1orf233	109	AFALnCSWR	VLLQWRLAPAAARRVRAFALNCSWRGAYTRFPCERVLLGAS	Breast cancer xenografts	2015	Unpublished
Reviewed	F5H284	PPIAL4D	Peptidyl-prolyl cis-trans isomerase A-like 4D	108	SMANAGPNTnGSQF	LIRKHTGSGILSMANAGPNTNGSQFFICAAKTEWLDGKHVA	Liver	2014	33
Reviewed	F5H284	PPIAL4D	Peptidyl-prolyl cis-trans isomerase A-like 4D	108	SMANAGPNTnGSQFF	LIRKHTGSGILSMANAGPNTNGSQFFICAAKTEWLDGKHVA	Liver	2014	33
Reviewed	F5H284	PPIAL4D	Peptidyl-prolyl cis-trans isomerase A-like 4D	108	KHTGSGILSMANAGPNTnGSQF	LIRKHTGSGILSMANAGPNTNGSQFFICAAKTEWLDGKHVA	Serum;Prostate tumor;Breast tumor	2007;2007;2007	Unpublished;Unpublished;Unpublished
Reviewed	G3V0H7	SLCO1B7	Putative solute carrier organic anion transporter family member 1B7	469	nYSAHLGECPR	KEPIVFYNCSCVEVIGLQNKNYSAHLGECPRDDACTRKSYV	Liver	2014	33
Reviewed	G3V0H7	SLCO1B7	Putative solute carrier organic anion transporter family member 1B7	469	nYSAHLGECPRDDACTR	KEPIVFYNCSCVEVIGLQNKNYSAHLGECPRDDACTRKSYV	Liver	2014	33
Reviewed	H0Y7S4	PRAMEF26	Putative PRAME family member 26	63	GRQPLTVFVELWLKnR	DCPRMRGRQPLTVFVELWLKNRTLDEHLTCLLLWVKQRKDL	Serum;Prostate tumor	2007;2007	Unpublished;Unpublished
Reviewed	H3BUK9	POTEB2	POTE ankyrin domain family member B2	395	HGSNPVGLPEnLTNGASAGNGDDGLIPQRK	DREVEEEIKKHGSNPVGLPENLTNGASAGNGDDGLIPQRKS	Prostate tumor;Ovarian tumor	2007;2007	Unpublished;Unpublished
Reviewed	O00115	DNASE2	Deoxyribonuclease-2-alpha	86	SnTSQLAFLLYNDQPPQP	ALINSPEGAVGRSLQPLYRSNTSQLAFLLYNDQPPQPSKAQ	Prostate;Ovarian tumor;Prostate tumor;Prostate tumor;Breast tumor;Breast cancer cell lines	2014;2015;2015;2007;2007;2007	14;Unpublished;Unpublished;Unpublished
Reviewed	O00115	DNASE2	Deoxyribonuclease-2-alpha	86	SnTSQLAFLLYNDQPPQPS	ALINSPEGAVGRSLQPLYRSNTSQLAFLLYNDQPPQPSKAQ	HEK293T cell line (embryonic kidney);Breast cell lines	2011;2012	57;52
Reviewed	O00115	DNASE2	Deoxyribonuclease-2-alpha	86	SnTSQIAFIIYNDQPPQPSK	ALINSPEGAVGRSLQPLYRSNTSQLAFLLYNDQPPQPSKAQ	DLBCL cell lines (Diffuse large B-cell lymphoma)	2014	16
Reviewed	O00115	DNASE2	Deoxyribonuclease-2-alpha	86	SnTSQLAFLLYNDQPPQPSK	ALINSPEGAVGRSLQPLYRSNTSQLAFLLYNDQPPQPSKAQ	TPC-1 Cell Line (Thyroid Cance);XTC-1 Cell Line (Thyroid Cance);DRO-1 Cell Line (Thyroid Cance);Breast cell lines;SKOV-3 cell line (Ovarian cancer); Jurkat T cell line;Prostate;Non-small Cell Lung Carcinoma;Ovarian tumor;LNCap/PC3 cell lines (Prostate cancer);Breast cancer xenografts;Prostate tumor;Urine;Urine;Urine	2009;2009;2009;2012;2013;2014;2014;2014;2015;2015;2015;2015;2015;2015;2015;	62;62;62;52;34;13;14;18;Unpublished;2;Unpublished;Unpublished;Unpublished;Unpublished;Unpublished;Unpublished
Reviewed	O00115	DNASE2	Deoxyribonuclease-2-alpha	86	SnTSQLAFLLYNDQPPQPSKAQDSSMR	ALINSPEGAVGRSLQPLYRSNTSQLAFLLYNDQPPQPSKAQ	Non-small Cell Lung Carcinoma	2014	18
Reviewed	O00115	DNASE2	Deoxyribonuclease-2-alpha	212	VSQEPWnSS	QEFPDLENVVKGHHVSQEPWNSSITLTSQAGAVFQSFAKFS	Liver	2009	64
Reviewed	O00115	DNASE2	Deoxyribonuclease-2-alpha	212	GHHVSQEPWnSSITL	QEFPDLENVVKGHHVSQEPWNSSITLTSQAGAVFQSFAKFS	HEK293T cell line (embryonic kidney)	2011	57
Reviewed	O00115	DNASE2	Deoxyribonuclease-2-alpha	212	nSSITLTSQAGAVFQSFAK	QEFPDLENVVKGHHVSQEPWNSSITLTSQAGAVFQSFAKFS	OVCAR-3 cell line (Ovarian cancer)	2015	1
Reviewed	O00115	DNASE2	Deoxyribonuclease-2-alpha	212	NVVKGHHVSQEPWnSSITL	QEFPDLENVVKGHHVSQEPWNSSITLTSQAGAVFQSFAKFS	Liver	2009	64
Reviewed	O00115	DNASE2	Deoxyribonuclease-2-alpha	212	ENVVKGHHVSQEPWnSSITL	QEFPDLENVVKGHHVSQEPWNSSITLTSQAGAVFQSFAKFS	Liver	2009	64
Reviewed	O00115	DNASE2	Deoxyribonuclease-2-alpha	212	GHHVSQEPWnSSITLTSQAGAVFQSF	QEFPDLENVVKGHHVSQEPWNSSITLTSQAGAVFQSFAKFS	Ovarian tumor	2015	Unpublished
Reviewed	O00115	DNASE2	Deoxyribonuclease-2-alpha	212	GHHVSQEPWnSSITITSQAGAVFQSFAK	QEFPDLENVVKGHHVSQEPWNSSITLTSQAGAVFQSFAKFS	DLBCL cell lines (Diffuse large B-cell lymphoma)	2014	16
Reviewed	O00115	DNASE2	Deoxyribonuclease-2-alpha	212	GHHVSQEPWnSSITLTSQAGAVFQSFAK	QEFPDLENVVKGHHVSQEPWNSSITLTSQAGAVFQSFAKFS	LnCap cell line (Prostate cancer);TPC-1 Cell Line (Thyroid Cance);XTC-1 Cell Line (Thyroid Cance);ARO Cell Line (Thyroid Cance);Breast cell lines;Liver;Ovarian tumor;OVCAR-3 cell line (Ovarian cancer);LNCap/PC3 cell lines (Prostate cancer);Prostate tumor;Breast tumor;Breast cancer cell lines;Ovarian tumor	2003;2009;2009;2009;2012;2014;2015;2015;2015;2007;2007;2007;2007	83;62;62;62;52;33;1;2;Unpublished;Unpublished;Unpublished;Unpublished
Reviewed	O00115	DNASE2	Deoxyribonuclease-2-alpha	266	VGIIPSnCSDIWQ	ALGTNLQVQFWHKTVGILPSNCSDIWQVLNVNQIAFPGPAG	Breast Cancer cell lines	2013	37
Reviewed	O00115	DNASE2	Deoxyribonuclease-2-alpha	266	TVGILPSnCSDIWQ	ALGTNLQVQFWHKTVGILPSNCSDIWQVLNVNQIAFPGPAG	Prostate tumor;Breast tumor;Ovarian tumor;Bladder tumor	2007;2007;2007;2007	Unpublished;Unpublished;Unpublished;Unpublished
Reviewed	O00115	DNASE2	Deoxyribonuclease-2-alpha	266	HKTVGILPSnCSDIW	ALGTNLQVQFWHKTVGILPSNCSDIWQVLNVNQIAFPGPAG	Liver	2014	33
Reviewed	O00115	DNASE2	Deoxyribonuclease-2-alpha	266	TVGILPSnCSDIWQVLNVNQIAFPGPAGPSFNSTEDHSK	ALGTNLQVQFWHKTVGILPSNCSDIWQVLNVNQIAFPGPAG	TPC-1 Cell Line (Thyroid Cance);XTC-1 Cell Line (Thyroid Cance);DRO-1 Cell Line (Thyroid Cance);Breast cell lines;K562A cell line (Leukemia);Liver;Ovarian tumor;LNCap/PC3 cell lines (Prostate cancer);Hela cell line (cervical cancer)	2009;2009;2009;2012;2014;2014;2015;2015;2015	62;62;62;52;25;33;Unpublished;2;12
Reviewed	O00115	DNASE2	Deoxyribonuclease-2-alpha	290	nSTEDHSK	IWQVLNVNQIAFPGPAGPSFNSTEDHSKWCVSPKGPWTCVG	OVCAR-3 cell line (Ovarian cancer)	2015	1
Reviewed	O00115	DNASE2	Deoxyribonuclease-2-alpha	290	PAGPSFnSTEDHS	IWQVLNVNQIAFPGPAGPSFNSTEDHSKWCVSPKGPWTCVG	Breast Cancer cell lines	2013	37
Reviewed	O00115	DNASE2	Deoxyribonuclease-2-alpha	290	PGPAGPSFnSTEDHSK	IWQVLNVNQIAFPGPAGPSFNSTEDHSKWCVSPKGPWTCVG	Urine;Urine;Prostate tumor	2007;2007;2007	Unpublished;Unpublished
Reviewed	O00115	DNASE2	Deoxyribonuclease-2-alpha	290	AFPGPAGPSFnSTEDHSK	IWQVLNVNQIAFPGPAGPSFNSTEDHSKWCVSPKGPWTCVG	Ovarian tumor	2015	Unpublished
Reviewed	O00115	DNASE2	Deoxyribonuclease-2-alpha	290	NVNQIAFPGPAGPSFnST	IWQVLNVNQIAFPGPAGPSFNSTEDHSKWCVSPKGPWTCVG	Liver	2014	33
Reviewed	O00115	DNASE2	Deoxyribonuclease-2-alpha	290	QIAFPGPAGPSFnSTEDHSK	IWQVLNVNQIAFPGPAGPSFNSTEDHSKWCVSPKGPWTCVG	HEK293T cell line (embryonic kidney);Ovarian tumor	2011;2015	57;Unpublished
Reviewed	O00115	DNASE2	Deoxyribonuclease-2-alpha	290	QIAFPGPAGPSFnSTEDHSKW	IWQVLNVNQIAFPGPAGPSFNSTEDHSKWCVSPKGPWTCVG	Liver	2014	33
Reviewed	O00115	DNASE2	Deoxyribonuclease-2-alpha	290	NVNQIAFPGPAGPSFnSTEDHSK	IWQVLNVNQIAFPGPAGPSFNSTEDHSKWCVSPKGPWTCVG	HEK293T cell line (embryonic kidney);Pancreatic islets;Ovarian tumor	2011;2012;2015	57;48;Unpublished
Reviewed	O00115	DNASE2	Deoxyribonuclease-2-alpha	290	NVNQIAFPGPAGPSFnSTEDHSKW	IWQVLNVNQIAFPGPAGPSFNSTEDHSKWCVSPKGPWTCVG	Liver	2014	33
Reviewed	O00115	DNASE2	Deoxyribonuclease-2-alpha	290	QVLNVNQIAFPGPAGPSFnSTEDHSKW	IWQVLNVNQIAFPGPAGPSFNSTEDHSKWCVSPKGPWTCVG	Liver	2014	33
Reviewed	O00115	DNASE2	Deoxyribonuclease-2-alpha	290	TVGILPSNCSDIWQVLNVNQIAFPGPAGPSFnSTEDHSK	IWQVLNVNQIAFPGPAGPSFNSTEDHSKWCVSPKGPWTCVG	TPC-1 Cell Line (Thyroid Cance);XTC-1 Cell Line (Thyroid Cance);DRO-1 Cell Line (Thyroid Cance);Breast cell lines;K562A cell line (Leukemia);Liver;Ovarian tumor;LNCap/PC3 cell lines (Prostate cancer);Hela cell line (cervical cancer)	2009;2009;2009;2012;2014;2014;2015;2015;2015	62;62;62;52;25;33;Unpublished;2;12
Reviewed	O00139	KIF2A	Kinesin-like protein KIF2A	133	nGSVSDISPVQAAK	VGSARARPSQFPEQSSSAQQNGSVSDISPVQAAKKEFGPPS	OVCAR-3 cell line (Ovarian cancer)	2015	1
Reviewed	O00139	KIF2A	Kinesin-like protein KIF2A	133	ARPSQFPEQSSSAQQnGSVSDISPVQAAK	VGSARARPSQFPEQSSSAQQNGSVSDISPVQAAKKEFGPPS	Hela cell line (cervical cancer)	2014	17
Reviewed	O00141	SGK1	Serine/threonine-protein kinase Sgk1	44	RMGLNDFIQKIAnNSYA	LIAFMKQRRMGLNDFIQKIANNSYACKHPEVQSILKISQPQ	Sample information lost	2007	Unpublished
Reviewed	O00144	FZD9	Frizzled-9	53	GIGYnLTR	GRGAAPCQAVEIPMCRGIGYNLTRMPNLLGHTSQGEAAAEL	Urine;Urine;Urine;Urine;Prostate tumor	2007;2015;2015;2007;2007	Unpublished;Unpublished
Reviewed	O00144	FZD9	Frizzled-9	158	NDPHALCMEAPEnATAGPAEPHK	DCARLPTRNDPHALCMEAPENATAGPAEPHKGLGMLPVAPR	Urine;Urine;Prostate tumor	2007;2007;2007	Unpublished;Unpublished
Reviewed	O00151	PDLIM1	PDZ and LIM domain protein 1	57	AALANLCIGDVITAIDGEnTSNMTHLEAQNR	SKAALANLCIGDVITAIDGENTSNMTHLEAQNRIKGCTDNL	Platelet;Serum	2015;2015	Unpublished;Unpublished
Reviewed	O00151	PDLIM1	PDZ and LIM domain protein 1	60	AALANLCIGDVITAIDGENTSnMTHLEAQNR	ALANLCIGDVITAIDGENTSNMTHLEAQNRIKGCTDNLTLT	Platelet;Serum	2015;2015	Unpublished;Unpublished
Reviewed	O00151	PDLIM1	PDZ and LIM domain protein 1	76	nLTLTVAR	ENTSNMTHLEAQNRIKGCTDNLTLTVARSEHKVWSPLVTEE	OVCAR-3 cell line (Ovarian cancer)	2015	1
Reviewed	O00151	PDLIM1	PDZ and LIM domain protein 1	121	MNIASEPQEVIHIGSAHnR	PYKMNLASEPQEVLHIGSAHNRSAMPFTASPASSTTARVIT	DLBCL cell lines (Diffuse large B-cell lymphoma)	2014	16
Reviewed	O00159	MYO1C	Unconventional myosin-Ic	398	TFTWLVGKInRSLASK	RDALAKAVYSRTFTWLVGKINRSLASKDVESPSWRSTTVLG	Urine;Urine;Prostate tumor	2007;2007;2007	Unpublished;Unpublished
Reviewed	O00161	SNAP23	Synaptosomal-associated protein 23	155	EDEMEEnLTQVGSILGNLK	ASGGYIKRITNDAREDEMEENLTQVGSILGNLKDMALNIGN	Prostate tumor;Lymphocytes	2007;2007	Unpublished;Unpublished
Reviewed	O00178	GTPBP1	GTP-binding protein 1	353	DDVIVTASnFSSER	GCRKIPVLVQSKDDVIVTASNFSSERMCPIFQISNVTGENL	Prostate	2014	14
Reviewed	O00186	STXBP3	Syntaxin-binding protein 3	266	MAYDLLPIEnDTYK	STVLHELTFQAMAYDLLPIENDTYKYKTDGKEKEAILEEED	Serum;Prostate tumor	2007;2007	Unpublished;Unpublished
Reviewed	O00186	STXBP3	Syntaxin-binding protein 3	506	nGSGAVSAR	IDNRLDSKEWPYCSQCPAVWNGSGAVSARQKPRANYLEDRK	OVCAR-3 cell line (Ovarian cancer)	2015	1
Reviewed	O00187	MASP2	Mannan-binding lectin serine protease 2	547	VVINSnITPICLPR	AGFDNDIALIKLNNKVVINSNITPICLPRKEAESFMRTDDI	Serum;Liver	2013;2014	42;33
Reviewed	O00194	RAB27B	Ras-related protein Rab-27B	59	VVYNAQGPnGSSGK	ITTVGIDFREKRVVYNAQGPNGSSGKAFKVHLQLWDTAGQE	Platelet	2015	Unpublished
Reviewed	O00206	TLR4	Toll-like receptor 4	173	LPEYFSnLTNLEHLDLSSNK	KELNVAHNLIQSFKLPEYFSNLTNLEHLDLSSNKIQSIYCT	Liver	2014	33
Reviewed	O00220	TNFRSF10A	Tumor necrosis factor receptor superfamily member 10A	156	CTEGVGYTnASNNIFACIPCTACK	SHRSEHPGACNRCTEGVGYTNASNNLFACLPCTACKSDEEE	DLBCL cell lines (Diffuse large B-cell lymphoma)	2014	16
Reviewed	O00241	SIRPB1	Signal-regulatory protein beta-1	109	ISnITPADAGTYYCVK	VTTVSELTKRNNLDFSISISNITPADAGTYYCVKFRKGSPD	Urine;Urine;Urine	2007;2015;2015;	Unpublished;Unpublished;Unpublished;Unpublished
Reviewed	O00241	SIRPB1	Signal-regulatory protein beta-1	244	GTAnLSEAIR	QVICEIAHITLQGDPLRGTANLSEAIRVPPTLEVTQQPMRA	Plasma;Urine;Urine;Urine;Liver;Urine;Urine;Urine;Urine;Serum;Prostate tumor;Lymphocytes	2005;2007;2012;2013;2014;2015;2015;2015;2007;2007;2007;2007	81;51;45;33;Unpublished;Unpublished;Unpublished;Unpublished
Reviewed	O00241	SIRPB1	Signal-regulatory protein beta-1	244	PIRGTAnISEAIR	QVICEIAHITLQGDPLRGTANLSEAIRVPPTLEVTQQPMRA	Breast Cancer cell lines	2013	37
Reviewed	O00241	SIRPB1	Signal-regulatory protein beta-1	269	RAENQAnVTCQVS	IRVPPTLEVTQQPMRAENQANVTCQVSNFYPRGLQLTWLEN	Breast Cancer cell lines	2013	37
Reviewed	O00241	SIRPB1	Signal-regulatory protein beta-1	269	AENQAnVTCQVSNFYPR	IRVPPTLEVTQQPMRAENQANVTCQVSNFYPRGLQLTWLEN	Urine;Urine;Urine;Urine;Prostate tumor	2007;2015;2015;2007;2007	Unpublished;Unpublished
Reviewed	O00241	SIRPB1	Signal-regulatory protein beta-1	291	LENGnVSRTET	TCQVSNFYPRGLQLTWLENGNVSRTETASTLIENKDGTYNW	Liver	2009	64
Reviewed	O00241	SIRPB1	Signal-regulatory protein beta-1	291	IQITWIENGnVSR	TCQVSNFYPRGLQLTWLENGNVSRTETASTLIENKDGTYNW	DLBCL cell lines (Diffuse large B-cell lymphoma);Liver	2014;2014	16;32
Reviewed	O00241	SIRPB1	Signal-regulatory protein beta-1	291	LQLTWLENGnVSR	TCQVSNFYPRGLQLTWLENGNVSRTETASTLIENKDGTYNW	Urine;Liver;HEK293T cell line (embryonic kidney);Colorectal cancer cell line, HCT-116 (colorectal cancer);Breast cell lines; HCC cell lines (Liver);umbilical vein Endothelial Cells;Urine;HEK293 cell line (embryonic kidney);Colorectal tumor;Liver;LNCap/PC3 cell lines (Prostate cancer);Breast cancer xenografts;Urine;Urine;Urine;Cerebrospinal fluid;Urine;Prostate tumor;Cerebrospinal fluid	2007;2009;2011;2011;2012;2013;2013;2013;2014;2014;2014;2015;2015;2015;2015;2015;2015;2007;2007;2007	64;57;58;52;40;44;45;15;22;33;2;5;Unpublished;Unpublished;Unpublished
Reviewed	O00241	SIRPB1	Signal-regulatory protein beta-1	291	TWIENGnVSRTET	TCQVSNFYPRGLQLTWLENGNVSRTETASTLIENKDGTYNW	Breast Cancer cell lines	2013	37
Reviewed	O00241	SIRPB1	Signal-regulatory protein beta-1	291	GLQLTWLENGnVSR	TCQVSNFYPRGLQLTWLENGNVSRTETASTLIENKDGTYNW	Urine;Urine;Urine;Urine;Urine;Urine	2007;2013;2015;2015;2015;2007	45;Unpublished
Reviewed	O00267	SUPT5H	Transcription elongation factor SPT5	656	nFTVGGFAPMSPR	FVCKTRHLVLAGGSKPRDVTNFTVGGFAPMSPRISSPMHPS	OVCAR-3 cell line (Ovarian cancer)	2015	1
Reviewed	O00295	TULP2	Tubby-related protein 2	447	QGLLLLHnKTPSWDKENGVYTLNFHGR	QESLLSRYQRGDKQGLLLLHNKTPSWDKENGVYTLNFHGRV	LNCap/PC3 cell lines (Prostate cancer)	2015	2
Reviewed	O00299	CLIC1	Chloride intracellular channel protein 1	42	nVTTVDTK	GNCPFSQRLFMVLWLKGVTFNVTTVDTKRRTETVQKLCPGG	OVCAR-3 cell line (Ovarian cancer)	2015	1
Reviewed	O00299	CLIC1	Chloride intracellular channel protein 1	42	GVTFnVTTVDTK	GNCPFSQRLFMVLWLKGVTFNVTTVDTKRRTETVQKLCPGG	Urine;HCCLM3 cell line (Liver); HCC cell lines (Liver);Prostate;Ovarian tumor;OVCAR-3 cell line (Ovarian cancer);Breast cancer xenografts;Urine;Urine;Urine;Prostate tumor	2007;2009;2013;2014;2015;2015;2015;2015;2015;2007;2007	63;40;14;1;Unpublished;Unpublished
Reviewed	O00299	CLIC1	Chloride intracellular channel protein 1	42	GVTFnVTTVDTKR	GNCPFSQRLFMVLWLKGVTFNVTTVDTKRRTETVQKLCPGG	Platelet	2015	Unpublished
Reviewed	O00299	CLIC1	Chloride intracellular channel protein 1	42	IKGVTFnVTTVDT	GNCPFSQRLFMVLWLKGVTFNVTTVDTKRRTETVQKLCPGG	Breast Cancer cell lines	2013	37
Reviewed	O00300	TNFRSF11B	Tumor necrosis factor receptor superfamily member 11B	98	ELQYVKQECnR	DECLYCSPVCKELQYVKQECNRTHNRVCECKEGRYLEIEFC	Non-small Cell Lung Carcinoma	2014	18
Reviewed	O00300	TNFRSF11B	Tumor necrosis factor receptor superfamily member 11B	152	CPDGFFSnETSSK	QAGTPERNTVCKRCPDGFFSNETSSKAPCRKHTNCSVFGLL	Bladder stromal cell line;Prostate stromal cell line;Non-small Cell Lung Carcinoma;Breast cancer xenografts	2009;2009;2014;2015	65;65;18;Unpublished
Reviewed	O00300	TNFRSF11B	Tumor necrosis factor receptor superfamily member 11B	152	PDGFFSnETSSKA	QAGTPERNTVCKRCPDGFFSNETSSKAPCRKHTNCSVFGLL	Breast Cancer cell lines	2013	37
Reviewed	O00300	TNFRSF11B	Tumor necrosis factor receptor superfamily member 11B	152	RCPDGFFSnETSSK	QAGTPERNTVCKRCPDGFFSNETSSKAPCRKHTNCSVFGLL	HuH-7 cell line (Liver)	2013	38
Reviewed	O00300	TNFRSF11B	Tumor necrosis factor receptor superfamily member 11B	152	CPDGFFSnETSSKAPCR	QAGTPERNTVCKRCPDGFFSNETSSKAPCRKHTNCSVFGLL	Non-small Cell Lung Carcinoma	2014	18
Reviewed	O00300	TNFRSF11B	Tumor necrosis factor receptor superfamily member 11B	165	PCRKHTnCSVFGI	CPDGFFSNETSSKAPCRKHTNCSVFGLLLTQKGNATHDNIC	Breast Cancer cell lines	2013	37
Reviewed	O00300	TNFRSF11B	Tumor necrosis factor receptor superfamily member 11B	165	KHTnCSVFGLLLTQK	CPDGFFSNETSSKAPCRKHTNCSVFGLLLTQKGNATHDNIC	Bladder stromal cell line;Prostate stromal cell line	2009;2009	65;65
Reviewed	O00300	TNFRSF11B	Tumor necrosis factor receptor superfamily member 11B	178	GnATHDNICSGNS	APCRKHTNCSVFGLLLTQKGNATHDNICSGNSESTQKCGID	Breast Cancer cell lines	2013	37
Reviewed	O00300	TNFRSF11B	Tumor necrosis factor receptor superfamily member 11B	178	IITQKGnATHDNI	APCRKHTNCSVFGLLLTQKGNATHDNICSGNSESTQKCGID	Breast Cancer cell lines	2013	37
Reviewed	O00300	TNFRSF11B	Tumor necrosis factor receptor superfamily member 11B	178	GnATHDNICSGNSESTQK	APCRKHTNCSVFGLLLTQKGNATHDNICSGNSESTQKCGID	Pancreatic islets;Non-small Cell Lung Carcinoma;Ovarian tumor	2012;2014;2015	48;18;Unpublished
Reviewed	O00300	TNFRSF11B	Tumor necrosis factor receptor superfamily member 11B	289	HIGHAnLTFEQLR	KIIQDIDLCENSVQRHIGHANLTFEQLRSLMESLPGKKVGA	Urine;HCCLM3 cell line (Liver);Bladder stromal cell line;Prostate stromal cell line; HCC cell lines (Liver);Non-small Cell Lung Carcinoma;Ovarian tumor;Breast cancer xenografts;Urine;Prostate tumor	2007;2009;2009;2009;2013;2014;2015;2015;2007;2007	63;65;65;40;18;Unpublished;Unpublished
Reviewed	O00303	EIF3F	Eukaryotic translation initiation factor 3 subunit F	342	nLTQSQIALNEK	DFETMLNSNINDLLMVTYLANLTQSQIALNEKLVNL-----	OVCAR-3 cell line (Ovarian cancer)	2015	1
Reviewed	O00308	WWP2	NEDD4-like E3 ubiquitin-protein ligase WWP2	102	NELLGTASVnLSNVLKNNGGK	DLKVWSCHTLRNELLGTASVNLSNVLKNNGGKMENMQLTLN	Serum;Prostate tumor;Prostate cancer cell lines	2007;2007;2007	Unpublished;Unpublished;Unpublished
Reviewed	O00337	SLC28A1	Sodium/nucleoside cotransporter 1	543	CGFAnFSSIGIMLGGLTSMVPQRK	KQWISVRAEVLTTFALCGFANFSSIGIMLGGLTSMVPQRKS	Pancreatic islets	2012	48
Reviewed	O00337	SLC28A1	Sodium/nucleoside cotransporter 1	643	FYnHTICA	FQSVNPEFSPEALDNCCRFYNHTICAQ--------------	Prostate tumor	2007	Unpublished
Reviewed	O00337	SLC28A1	Sodium/nucleoside cotransporter 1	643	FYnHTICAQ	FQSVNPEFSPEALDNCCRFYNHTICAQ--------------	Urine;Urine;Liver;Urine;Urine	2007;2013;2014;2015;2015;	Unpublished;45;33;Unpublished;Unpublished;Unpublished
Reviewed	O00339	MATN2	Matrilin-2	221	AnFSQIETLTSVFQK	FNTLKSIGSEPHEDHVFLVANFSQIETLTSVFQKKLCTAHM	Serum;Prostate tumor;Bladder tumor	2007;2007;2007	Unpublished;Unpublished;Unpublished
Reviewed	O00339	MATN2	Matrilin-2	221	SIGSEPHEDHVFLVAnFSQIE	FNTLKSIGSEPHEDHVFLVANFSQIETLTSVFQKKLCTAHM	Liver	2014	33
Reviewed	O00339	MATN2	Matrilin-2	221	SIGSEPHEDHVFLVAnFSQIETLTSVFQK	FNTLKSIGSEPHEDHVFLVANFSQIETLTSVFQKKLCTAHM	Ovarian tumor;LNCap/PC3 cell lines (Prostate cancer);Breast cancer xenografts	2015;2015;2015	Unpublished;2;Unpublished
Reviewed	O00391	QSOX1	Sulfhydryl oxidase 1	130	FKAFTKnGSGAVF	CRDFNIPGFPTVRFFKAFTKNGSGAVFPVAGADVQTLRERL	Breast Cancer cell lines	2013	37
Reviewed	O00391	QSOX1	Sulfhydryl oxidase 1	130	nGSGAVFPVAGADVQTLR	CRDFNIPGFPTVRFFKAFTKNGSGAVFPVAGADVQTLRERL	Urine;HCCLM3 cell line (Liver);Plasma;ovarian tumor;Breast cell lines; HCC cell lines (Liver);plasma;Prostate;Non-small Cell Lung Carcinoma;Colorectal tumor;Serum;Ovarian tumor;Breast cancer xenografts;Urine;Serum;Urine;Urine;Plasma;Serum;Hela cell line (cervical cancer);Urine;Serum;Prostate tumor;Breast tumor;Breast cancer cell lines;Ovarian tumor	2007;2009;2009;2011;2012;2013;2013;2014;2014;2014;2014;2015;2015;2015;2015;2015;2015;2015;2015;2015;2007;2007;2007;2007;2007;2007	63;66;54;52;40;45;14;18;22;27;8;10;12;Unpublished;Unpublished;Unpublished;Unpublished;Unpublished;Unpublished
Reviewed	O00391	QSOX1	Sulfhydryl oxidase 1	130	AFTKnGSGAVFPVAGADVQTLR	CRDFNIPGFPTVRFFKAFTKNGSGAVFPVAGADVQTLRERL	Plasma;Prostate stromal cell line;Non-small Cell Lung Carcinoma;Urine;Serum;Urine;Urine	2005;2009;2014;2015;2015;2015;2015;	81;65;18;Unpublished;Unpublished;Unpublished;Unpublished;Unpublished
Reviewed	O00391	QSOX1	Sulfhydryl oxidase 1	575	IEIESRnSTIDPG	VQNVAAAPELAMGALELESRNSTLDPGKPEMMKSPTNTTPH	Breast Cancer cell lines	2013	37
Reviewed	O00391	QSOX1	Sulfhydryl oxidase 1	575	nSTLDPGKPEMMK	VQNVAAAPELAMGALELESRNSTLDPGKPEMMKSPTNTTPH	Saliva;Urine;Urine;Urine;Plasma;Serum	2011;2013;2015;2015;2015;2015;	56;45;Unpublished;Unpublished;8;10;Unpublished
Reviewed	O00400	SLC33A1	Acetyl-coenzyme A transporter 1	18	RPGnFSHSLDMK	---MSPTISHKDSSRQRRPGNFSHSLDMKSGPLPPGGWDDS	Jurkat T cell line	2014	13
Reviewed	O00410	IPO5	Importin-5	468	nFTEDCPK	QTMEDQGNQRVQAHAAAALINFTEDCPKSLLIPYLDNLVKH	OVCAR-3 cell line (Ovarian cancer)	2015	1
Reviewed	O00410	IPO5	Importin-5	967	nATENCISAVGK	ALPLLVRVIQSADSKTKENVNATENCISAVGKIMKFKPDCV	OVCAR-3 cell line (Ovarian cancer)	2015	1
Reviewed	O00425	IGF2BP3	Insulin-like growth factor 2 mRNA-binding protein 3	515	nLSSAEVVVPR	PSFAAGRVIGKGGKTVNELQNLSSAEVVVPRDQTPDENDQV	OVCAR-3 cell line (Ovarian cancer)	2015	1
Reviewed	O00429	DNM1L	Dynamin-1-like protein	141	nLTLVDLPGMTK	NNKGVSPEPIHLKIFSPNVVNLTLVDLPGMTKVPVGDQPKD	Urine;Urine;Prostate tumor	2007;2007;2007	Unpublished;Unpublished
Reviewed	O00429	DNM1L	Dynamin-1-like protein	280	YPSLANRnG	DSIRDEYAFLQKKYPSLANRNGTKYLARTLNRLLMHHIRDC	Prostate tumor;Breast tumor;Breast cancer cell lines	2007;2007;2007	Unpublished;Unpublished;Unpublished
Reviewed	O00429	DNM1L	Dynamin-1-like protein	448	nYSTQELLR	SLRCVELVHEEMQRIIQHCSNYSTQELLRFPKLHDAIVEVV	OVCAR-3 cell line (Ovarian cancer)	2015	1
Reviewed	O00442	RTCA	RNA 3'-terminal phosphate cyclase	182	MSPVKQLNPInLTER	PKGGGEVIVRMSPVKQLNPINLTERGCVTKIYGRAFVAGVL	Colorectal tumors	2009	68
Reviewed	O00451	GFRA2	GDNF family receptor alpha-2	52	ICAAESnCSSRYR	HGWRPPVDCVRANELCAAESNCSSRYRTLRQCLAGRDRNTM	Breast Cancer cell lines	2013	37
Reviewed	O00451	GFRA2	GDNF family receptor alpha-2	52	ANELCAAESnCSSR	HGWRPPVDCVRANELCAAESNCSSRYRTLRQCLAGRDRNTM	Liver	2014	33
Reviewed	O00451	GFRA2	GDNF family receptor alpha-2	357	NAIQAFGnGTDVNVSPK	KFLRDFTENPCLRNAIQAFGNGTDVNVSPKGPSFQATQAPR	Urine;Non-small Cell Lung Carcinoma;Colorectal tumor;Liver;Urine;Urine;Serum;Urine;Prostate tumor;Cerebrospinal fluid	2007;2014;2014;2014;2015;2015;2015;2007;2007;2007	18;22;33;10;Unpublished;Unpublished;Unpublished
Reviewed	O00451	GFRA2	GDNF family receptor alpha-2	362	NAIQAFGNGTDVnVSPK	FTENPCLRNAIQAFGNGTDVNVSPKGPSFQATQAPRVEKTP	Urine;Non-small Cell Lung Carcinoma;Colorectal tumor;Liver;Urine;Urine;Serum;Urine;Prostate tumor;Cerebrospinal fluid	2007;2014;2014;2014;2015;2015;2015;2007;2007;2007	18;22;33;10;Unpublished;Unpublished;Unpublished
Reviewed	O00459	PIK3R2	Phosphatidylinositol 3-kinase regulatory subunit beta	628	TWYVGKInRTQAEEMLSGK	MEDEDDLPHHEERTWYVGKINRTQAEEMLSGKRDGTFLIRE	Serum	2010	40
Reviewed	O00461	GOLIM4	Golgi integral membrane protein 4	257	nVTQVAHSPQGYNTAR	LKDTLNRIPSLRKPDPAEQQNVTQVAHSPQGYNTAREKPTR	OVCAR-3 cell line (Ovarian cancer)	2015	1
Reviewed	O00461	GOLIM4	Golgi integral membrane protein 4	257	KPDPAEQQnVTQVAHSPQGY	LKDTLNRIPSLRKPDPAEQQNVTQVAHSPQGYNTAREKPTR	HEK293T cell line (embryonic kidney)	2011	57
Reviewed	O00461	GOLIM4	Golgi integral membrane protein 4	257	DPAEQQnVTQVAHSPQGYNTAR	LKDTLNRIPSLRKPDPAEQQNVTQVAHSPQGYNTAREKPTR	Pancreatic islets	2012	48
Reviewed	O00461	GOLIM4	Golgi integral membrane protein 4	257	KPDPAEQQnVTQVAHSPQGYNTAR	LKDTLNRIPSLRKPDPAEQQNVTQVAHSPQGYNTAREKPTR	Urine;HEK293T cell line (embryonic kidney);Pancreatic isletsJurkat T cell line;HEK293 cell line (embryonic kidney);DLBCL cell lines (Diffuse large B-cell lymphoma);Liver;Ovarian tumor;Urine;Urine;Hela cell line (cervical cancer);Urine;Prostate tumor	2007;2011;2012;2014;2014;2014;2014;2015;2015;2015;2015;2007;2007	57;48;13;15;16;33;12;Unpublished;Unpublished
Reviewed	O00462	MANBA	Beta-mannosidase	77	WVSIDnWTYSK	LIQDSYYRFNDLNYRWVSLDNWTYSKEFKIPFEISKWQKVN	DLBCL cell lines (Diffuse large B-cell lymphoma)	2014	16
Reviewed	O00462	MANBA	Beta-mannosidase	77	WVSLDnWTYSK	LIQDSYYRFNDLNYRWVSLDNWTYSKEFKIPFEISKWQKVN	TPC-1 Cell Line (Thyroid Cance);ARO Cell Line (Thyroid Cance);Breast cell lines; HCC cell lines (Liver);Liver;Ovarian tumor;OVCAR-3 cell line (Ovarian cancer);LNCap/PC3 cell lines (Prostate cancer);Breast cancer xenografts;Urine;Urine;Prostate tumor;Ovarian tumor	2009;2009;2012;2013;2014;2015;2015;2015;2015;2015;2015;2007;2007	62;62;52;40;33;1;2;Unpublished;Unpublished
Reviewed	O00462	MANBA	Beta-mannosidase	77	WVSLDnWTYSKE	LIQDSYYRFNDLNYRWVSLDNWTYSKEFKIPFEISKWQKVN	Liver	2014	33
Reviewed	O00462	MANBA	Beta-mannosidase	77	RWVSIDnWTYSKE	LIQDSYYRFNDLNYRWVSLDNWTYSKEFKIPFEISKWQKVN	Breast Cancer cell lines	2013	37
Reviewed	O00462	MANBA	Beta-mannosidase	280	LFVnISK	TQQTYSIELQPGKRIVELFVNISKNITVETWWPHGHGNQTG	Liver	2014	33
Reviewed	O00462	MANBA	Beta-mannosidase	280	IVELFVnISK	TQQTYSIELQPGKRIVELFVNISKNITVETWWPHGHGNQTG	Breast cell lines;Liver;Ovarian tumor;LNCap/PC3 cell lines (Prostate cancer);Urine;Urine;Urine	2012;2014;2015;2015;2015;2015;2015;	52;33;Unpublished;2;Unpublished;Unpublished;Unpublished;Unpublished
Reviewed	O00462	MANBA	Beta-mannosidase	280	IVEIFVnISKNIT	TQQTYSIELQPGKRIVELFVNISKNITVETWWPHGHGNQTG	Breast Cancer cell lines	2013	37
Reviewed	O00462	MANBA	Beta-mannosidase	284	IVEIFVNISKnIT	YSIELQPGKRIVELFVNISKNITVETWWPHGHGNQTGYNMT	Breast Cancer cell lines	2013	37
Reviewed	O00468	AGRN	Agrin	135	MLnSSLM	FFVNPAPPYLWPAHKNELMLNSSLMRITLRNLEEVEFCVED	Liver	2014	33
Reviewed	O00468	AGRN	Agrin	135	MLnSSLMR	FFVNPAPPYLWPAHKNELMLNSSLMRITLRNLEEVEFCVED	Liver	2014	33
Reviewed	O00468	AGRN	Agrin	135	LMLnSSLMR	FFVNPAPPYLWPAHKNELMLNSSLMRITLRNLEEVEFCVED	Liver	2014	33
Reviewed	O00468	AGRN	Agrin	135	NEIMInSSIMR	FFVNPAPPYLWPAHKNELMLNSSLMRITLRNLEEVEFCVED	Spermatozoa;DLBCL cell lines (Diffuse large B-cell lymphoma)	2013;2014	43;16
Reviewed	O00468	AGRN	Agrin	135	NELMLnSSLMR	FFVNPAPPYLWPAHKNELMLNSSLMRITLRNLEEVEFCVED	Urine;IGROV-1/CP cell line (Ovarian cancer)IGROV-1/CP;TPC-1 Cell Line (Thyroid Cance);XTC-1 Cell Line (Thyroid Cance);ARO Cell Line (Thyroid Cance);HCCLM3 cell line (Liver);Liver;Bladder stromal cell line;Prostate stromal cell line;ovarian tumor;Colorectal cancer cell line, HCT-116 (colorectal cancer);Pancreatic islets;Breast cell lines;OVCAR-3 cell line (Ovarian cancer);SKOV-3 cell line (Ovarian…	2007;2007;2009;2009;2009;2009;2009;2009;2009;2011;2011;2012;2012;2013;2013;2013;2013;2013;2013;2014;2014;2014;2014;2014;2015;2015;2015;2015;2015;2015;2015;2015;2007;2007;2007;2007;2007;2007	75;62;62;62;63;64;65;65;54;58;48;52;34;34;34;38;38;40;13;14;18;22;33;1;2;Unpublished;Unpublished;Unpublished;Unpublished;Unpublished;Unpublished
Reviewed	O00468	AGRN	Agrin	135	KNEIMInSSIMRI	FFVNPAPPYLWPAHKNELMLNSSLMRITLRNLEEVEFCVED	Breast Cancer cell lines	2013	37
Reviewed	O00468	AGRN	Agrin	250	nVTCSFGSTCAR	QQRRIRLLSRGPCGSRDPCSNVTCSFGSTCARSADGLTASC	OVCAR-3 cell line (Ovarian cancer)	2015	1
Reviewed	O00468	AGRN	Agrin	250	GSRDPCSnVTCSF	QQRRIRLLSRGPCGSRDPCSNVTCSFGSTCARSADGLTASC	Liver	2014	33
Reviewed	O00468	AGRN	Agrin	250	SRDPCSnVTCSFG	QQRRIRLLSRGPCGSRDPCSNVTCSFGSTCARSADGLTASC	Breast Cancer cell lines	2013	37
Reviewed	O00468	AGRN	Agrin	250	DPCSnVTCSFGSTCAR	QQRRIRLLSRGPCGSRDPCSNVTCSFGSTCARSADGLTASC	TPC-1 Cell Line (Thyroid Cance);ARO Cell Line (Thyroid Cance); HCC cell lines (Liver);Non-small Cell Lung Carcinoma;Liver;Breast cancer xenografts;Prostate tumor;Ovarian tumor	2009;2009;2013;2014;2014;2015;2007;2007	62;62;40;18;33;Unpublished;Unpublished
Reviewed	O00468	AGRN	Agrin	250	SRGPCGSRDPCSnVTCSF	QQRRIRLLSRGPCGSRDPCSNVTCSFGSTCARSADGLTASC	Liver	2014	33
Reviewed	O00468	AGRN	Agrin	250	LSRGPCGSRDPCSnVTCSF	QQRRIRLLSRGPCGSRDPCSNVTCSFGSTCARSADGLTASC	Liver	2014	33
Reviewed	O00468	AGRN	Agrin	250	GPCGSRDPCSnVTCSFGSTCAR	QQRRIRLLSRGPCGSRDPCSNVTCSFGSTCARSADGLTASC	Non-small Cell Lung Carcinoma	2014	18
Reviewed	O00468	AGRN	Agrin	250	LLSRGPCGSRDPCSnVTCSFGSTCAR	QQRRIRLLSRGPCGSRDPCSNVTCSFGSTCARSADGLTASC	HepG2 cell line (Liver);HuH-7 cell line (Liver)	2013;2013	38;38
Reviewed	O00468	AGRN	Agrin	777	GCCQDnITAAR	PLPPVAPLHCAQTPYGCCQDNITAARGVGLAGCPSACQCNP	Pancreatic islets;Liver	2012;2014	48;33
Reviewed	O00468	AGRN	Agrin	777	GCCQDnITAARG	PLPPVAPLHCAQTPYGCCQDNITAARGVGLAGCPSACQCNP	Liver	2014	33
Reviewed	O00468	AGRN	Agrin	777	GCCQDnITAARGVGL	PLPPVAPLHCAQTPYGCCQDNITAARGVGLAGCPSACQCNP	Liver	2014	33
Reviewed	O00468	AGRN	Agrin	777	HCAQTPYGCCQDnITAAR	PLPPVAPLHCAQTPYGCCQDNITAARGVGLAGCPSACQCNP	Liver	2014	33
Reviewed	O00468	AGRN	Agrin	777	GPTFAPLPPVAPLHCAQTPYGCCQDnITAAR	PLPPVAPLHCAQTPYGCCQDNITAARGVGLAGCPSACQCNP	TPC-1 Cell Line (Thyroid Cance);XTC-1 Cell Line (Thyroid Cance);ARO Cell Line (Thyroid Cance);SKOV-3 cell line (Ovarian cancer);Ovarian tumor;Hela cell line (cervical cancer);Prostate tumor;Breast tumor;Breast cancer cell lines;Ovarian tumor;Prostate cancer metastasis to liver	2009;2009;2009;2013;2015;2015;2007;2007;2007;2007;2007	62;62;62;34;12;Unpublished;Unpublished;Unpublished;Unpublished;Unpublished
Reviewed	O00468	AGRN	Agrin	932	LTCPEAnATK	CVEESGSAHCVCPMLTCPEANATKVCGSDGVTYGNECQLKT	Ovarian tumor	2015	Unpublished
Reviewed	O00468	AGRN	Agrin	932	ITCPEAnATKVCG	CVEESGSAHCVCPMLTCPEANATKVCGSDGVTYGNECQLKT	Breast Cancer cell lines	2013	37
Reviewed	O00468	AGRN	Agrin	932	LTCPEAnATKVCGSDGVTY	CVEESGSAHCVCPMLTCPEANATKVCGSDGVTYGNECQLKT	Liver	2014	33
Reviewed	O00468	AGRN	Agrin	932	CVEESGSAHCVCPMITCPEAnATK	CVEESGSAHCVCPMLTCPEANATKVCGSDGVTYGNECQLKT	Liver tumor (HCC);Liver	2014;2014	32;32
Reviewed	O00468	AGRN	Agrin	932	CVEESGSAHCVCPMLTCPEAnATK	CVEESGSAHCVCPMLTCPEANATKVCGSDGVTYGNECQLKT	Urine;HuH-7 cell line (Liver); HCC cell lines (Liver);Urine;Liver;Breast cancer xenografts;Hela cell line (cervical cancer);Urine;Prostate tumor	2007;2013;2013;2013;2014;2015;2015;2007;2007	38;40;45;33;12;Unpublished;Unpublished
Reviewed	O00469	PLOD2	Procollagen-lysine,2-oxoglutarate 5-dioxygenase 2	63	YFnYTVK	TVATKESDGFHRFMQSAKYFNYTVKVLGQGEEWRGGDGINS	Pancreatic islets;HuH-7 cell line (Liver); HCC cell lines (Liver);Prostate;Hela cell line (cervical cancer);Non-small Cell Lung Carcinoma;Liver;Colorectal tumor;Liver;Ovarian tumor;LNCap/PC3 cell lines (Prostate cancer);Breast cancer xenografts;Urine;Urine;Prostate tumor;Ovarian tumor	2012;2013;2013;2014;2014;2014;2014;2014;2014;2015;2015;2015;2015;2015;2007;2007	48;38;40;14;17;18;19;22;33;2;Unpublished;Unpublished
Reviewed	O00469	PLOD2	Procollagen-lysine,2-oxoglutarate 5-dioxygenase 2	63	KYFnYTVK	TVATKESDGFHRFMQSAKYFNYTVKVLGQGEEWRGGDGINS	Ovarian tumor	2015	Unpublished
Reviewed	O00469	PLOD2	Procollagen-lysine,2-oxoglutarate 5-dioxygenase 2	209	nITLDHK	DDDQLFYTKVYIDPLKREAINITLDHKCKIFQTLNGAVDEV	OVCAR-3 cell line (Ovarian cancer)	2015	1
Reviewed	O00469	PLOD2	Procollagen-lysine,2-oxoglutarate 5-dioxygenase 2	209	EAInITIDHK	DDDQLFYTKVYIDPLKREAINITLDHKCKIFQTLNGAVDEV	Liver	2014	32
Reviewed	O00469	PLOD2	Procollagen-lysine,2-oxoglutarate 5-dioxygenase 2	209	EAInITLDHK	DDDQLFYTKVYIDPLKREAINITLDHKCKIFQTLNGAVDEV	HCCLM3 cell line (Liver);Liver;Saliva;Colorectal cancer cell line, HCT-116 (colorectal cancer);Pancreatic islets;SKOV-3 cell line (Ovarian cancer); HCC cell lines (Liver);Hela cell line (cervical cancer);Non-small Cell Lung Carcinoma;Colorectal tumor;Liver;Ovarian tumor;OVCAR-3 cell line (Ovarian cancer);Platelet;LNCap/PC3 cell lines (Prostate cancer);Breast cancer xenografts;Hela cell line (cerv…	2009;2009;2011;2011;2012;2013;2013;2014;2014;2014;2014;2015;2015;2015;2015;2015;2015	63;64;56;58;48;34;40;17;18;22;33;Unpublished;1;Unpublished;2;Unpublished;12
Reviewed	O00469	PLOD2	Procollagen-lysine,2-oxoglutarate 5-dioxygenase 2	209	IKREAInITIDHK	DDDQLFYTKVYIDPLKREAINITLDHKCKIFQTLNGAVDEV	Breast Cancer cell lines	2013	37
Reviewed	O00469	PLOD2	Procollagen-lysine,2-oxoglutarate 5-dioxygenase 2	297	SAVDVHPnVSIGVF	NGCTLCEFDTVDLSAVDVHPNVSIGVFIEQPTPFLPRFLDI	Liver	2014	33
Reviewed	O00469	PLOD2	Procollagen-lysine,2-oxoglutarate 5-dioxygenase 2	365	nLSQAEAR	VFFDKAKHEIKTIKIVGPEENLSQAEARNMGMDFCRQDEKC	OVCAR-3 cell line (Ovarian cancer)	2015	1
Reviewed	O00469	PLOD2	Procollagen-lysine,2-oxoglutarate 5-dioxygenase 2	365	IVGPEEnLSQAEAR	VFFDKAKHEIKTIKIVGPEENLSQAEARNMGMDFCRQDEKC	Breast cell lines; HCC cell lines (Liver);Hela cell line (cervical cancer)	2012;2013;2015	52;40;12
Reviewed	O00469	PLOD2	Procollagen-lysine,2-oxoglutarate 5-dioxygenase 2	522	STANYnTSHY	VFMYISNRHEFGRLLSTANYNTSHYNNDLWQIFENPVDWKE	Liver	2014	33
Reviewed	O00469	PLOD2	Procollagen-lysine,2-oxoglutarate 5-dioxygenase 2	522	LLSTANYnTSHY	VFMYISNRHEFGRLLSTANYNTSHYNNDLWQIFENPVDWKE	Pancreatic islets;Liver	2012;2014	48;33
Reviewed	O00469	PLOD2	Procollagen-lysine,2-oxoglutarate 5-dioxygenase 2	522	LLSTANYnTSHYNND	VFMYISNRHEFGRLLSTANYNTSHYNNDLWQIFENPVDWKE	Liver	2014	33
Reviewed	O00469	PLOD2	Procollagen-lysine,2-oxoglutarate 5-dioxygenase 2	522	LLSTANYnTSHYNNDLWQIFENPVDWK	VFMYISNRHEFGRLLSTANYNTSHYNNDLWQIFENPVDWKE	Liver;Colorectal cancer cell line, HCT-116 (colorectal cancer);Breast cell lines;Liver;Ovarian tumor	2009;2011;2012;2014;2015	64;58;52;33;Unpublished
Reviewed	O00469	PLOD2	Procollagen-lysine,2-oxoglutarate 5-dioxygenase 2	696	YnCSIESPR	IALNNVGEDFQGGGCKFLRYNCSIESPRKGWSFMHPGRLTH	HCCLM3 cell line (Liver);Pancreatic islets;OVCAR-3 cell line (Ovarian cancer);SKOV-3 cell line (Ovarian cancer);Ovarian tumor; HCC cell lines (Liver);Prostate;HEK293 cell line (embryonic kidney);Hela cell line (cervical cancer);Non-small Cell Lung Carcinoma;Colorectal tumor;Liver;Ovarian tumor;OVCAR-3 cell line (Ovarian cancer);Breast cancer xenografts;Prostate tumor;Hela cell line (cervical canc…	2009;2012;2013;2013;2013;2013;2014;2014;2014;2014;2014;2014;2015;2015;2015;2015;2015;2007;2007	63;48;34;34;34;40;14;15;17;18;22;33;1;12;Unpublished;Unpublished
Reviewed	O00469	PLOD2	Procollagen-lysine,2-oxoglutarate 5-dioxygenase 2	696	YnCSIESPRK	IALNNVGEDFQGGGCKFLRYNCSIESPRKGWSFMHPGRLTH	Hela cell line (cervical cancer)	2015	12
Reviewed	O00469	PLOD2	Procollagen-lysine,2-oxoglutarate 5-dioxygenase 2	696	FLRYnCSIESPR	IALNNVGEDFQGGGCKFLRYNCSIESPRKGWSFMHPGRLTH	HepG2 cell line (Liver);HuH-7 cell line (Liver);Non-small Cell Lung Carcinoma	2013;2013;2014	38;38;18
Reviewed	O00469	PLOD2	Procollagen-lysine,2-oxoglutarate 5-dioxygenase 2	696	CKFIRYnCSIESP	IALNNVGEDFQGGGCKFLRYNCSIESPRKGWSFMHPGRLTH	Breast Cancer cell lines	2013	37
Reviewed	O00469	PLOD2	Procollagen-lysine,2-oxoglutarate 5-dioxygenase 2	696	FLRYnCSIESPRK	IALNNVGEDFQGGGCKFLRYNCSIESPRKGWSFMHPGRLTH	HepG2 cell line (Liver);HuH-7 cell line (Liver)	2013;2013	38;38
Reviewed	O00469	PLOD2	Procollagen-lysine,2-oxoglutarate 5-dioxygenase 2	725	LHEGLPVKnGTRY	GWSFMHPGRLTHLHEGLPVKNGTRYIAVSFIDP--------	Liver	2014	33
Reviewed	O00469	PLOD2	Procollagen-lysine,2-oxoglutarate 5-dioxygenase 2	725	LTHLHEGLPVKnGTR	GWSFMHPGRLTHLHEGLPVKNGTRYIAVSFIDP--------	HeLa cell line (Cervical cancer);SKOV-3 cell line (Ovarian cancer);Non-small Cell Lung Carcinoma;Liver;LNCap/PC3 cell lines (Prostate cancer);Hela cell line (cervical cancer)	2009;2013;2014;2014;2015;2015	67;34;18;33;2;12
Reviewed	O00469	PLOD2	Procollagen-lysine,2-oxoglutarate 5-dioxygenase 2	725	THLHEGLPVKnGTRY	GWSFMHPGRLTHLHEGLPVKNGTRYIAVSFIDP--------	Liver	2014	33
Reviewed	O00472	ELL2	RNA polymerase II elongation factor ELL2	500	LnNSSPNSSGGVK	IETIEEKEEDLKREEEIAKLNNSSPNSSGGVKEDCTASMEP	Prostate tumor;Ovarian tumor	2007;2007	Unpublished;Unpublished
Reviewed	O00472	ELL2	RNA polymerase II elongation factor ELL2	501	LNnSSPNSSGGVK	ETIEEKEEDLKREEEIAKLNNSSPNSSGGVKEDCTASMEPS	Prostate tumor;Ovarian tumor	2007;2007	Unpublished;Unpublished
Reviewed	O00472	ELL2	RNA polymerase II elongation factor ELL2	505	LNNSSPnSSGGVK	EKEEDLKREEEIAKLNNSSPNSSGGVKEDCTASMEPSAIEL	Prostate tumor;Ovarian tumor	2007;2007	Unpublished;Unpublished
Reviewed	O00478	BTN3A3	Butyrophilin subfamily 3 member A3	115	IHnVTASDSGK	GRTSILRDGITAGKAALRIHNVTASDSGKYLCYFQDGDFYE	IGROV-1/CP cell line (Ovarian cancer)IGROV-1/CP;OVCAR-3 cell line (Ovarian cancer);SKOV-3 cell line (Ovarian cancer);DLBCL cell lines (Diffuse large B-cell lymphoma);Colorectal tumor;Liver;Ovarian tumor;Platelet;LNCap/PC3 cell lines (Prostate cancer);Breast cancer xenografts;Prostate tumor;Urine;Urine;HEK293T cell line (embryonic kidney), HEK293T cell line (embryonic kidney);Prostate tumor;Ovaria…	2007;2013;2013;2014;2014;2014;2015;2015;2015;2015;2015;2015;2015;2015;2007;2007;2007;2007	75;34;34;16;22;33;2;9;Unpublished;Unpublished;Unpublished;Unpublished
Reviewed	O00478	BTN3A3	Butyrophilin subfamily 3 member A3	115	RIHnVTASDSGKY	GRTSILRDGITAGKAALRIHNVTASDSGKYLCYFQDGDFYE	Liver	2014	33
Reviewed	O00478	BTN3A3	Butyrophilin subfamily 3 member A3	115	RIHnVTASDSGKYL	GRTSILRDGITAGKAALRIHNVTASDSGKYLCYFQDGDFYE	Liver	2014	33
Reviewed	O00478	BTN3A3	Butyrophilin subfamily 3 member A3	115	AALRIHnVTASDSGK	GRTSILRDGITAGKAALRIHNVTASDSGKYLCYFQDGDFYE	HepG2 cell line (Liver)	2013	38
Reviewed	O00478	BTN3A3	Butyrophilin subfamily 3 member A3	115	TAGKAALRIHnVTASDSGKY	GRTSILRDGITAGKAALRIHNVTASDSGKYLCYFQDGDFYE	Human	2015	6
Reviewed	O00481	BTN3A1	Butyrophilin subfamily 3 member A1	115	IHnVTASDSGK	GRTSILRDGITAGKAALRIHNVTASDSGKYLCYFQDGDFYE	IGROV-1/CP cell line (Ovarian cancer)IGROV-1/CP;OVCAR-3 cell line (Ovarian cancer);SKOV-3 cell line (Ovarian cancer);DLBCL cell lines (Diffuse large B-cell lymphoma);Colorectal tumor;Liver;Ovarian tumor;Platelet;LNCap/PC3 cell lines (Prostate cancer);Breast cancer xenografts;Prostate tumor;Urine;Urine;HEK293T cell line (embryonic kidney), HEK293T cell line (embryonic kidney);Prostate tumor;Ovaria…	2007;2013;2013;2014;2014;2014;2015;2015;2015;2015;2015;2015;2015;2015;2007;2007;2007;2007	75;34;34;16;22;33;2;9;Unpublished;Unpublished;Unpublished;Unpublished
Reviewed	O00481	BTN3A1	Butyrophilin subfamily 3 member A1	115	RIHnVTASDSGKY	GRTSILRDGITAGKAALRIHNVTASDSGKYLCYFQDGDFYE	Liver	2014	33
Reviewed	O00481	BTN3A1	Butyrophilin subfamily 3 member A1	115	RIHnVTASDSGKYL	GRTSILRDGITAGKAALRIHNVTASDSGKYLCYFQDGDFYE	Liver	2014	33
Reviewed	O00481	BTN3A1	Butyrophilin subfamily 3 member A1	115	AALRIHnVTASDSGK	GRTSILRDGITAGKAALRIHNVTASDSGKYLCYFQDGDFYE	HepG2 cell line (Liver)	2013	38
Reviewed	O00481	BTN3A1	Butyrophilin subfamily 3 member A1	115	TAGKAALRIHnVTASDSGKY	GRTSILRDGITAGKAALRIHNVTASDSGKYLCYFQDGDFYE	Human	2015	6
Reviewed	O00487	PSMD14	26S proteasome non-ATPase regulatory subunit 14	241	HnESVVKEMLELAKNYNK	HKKSWMEGLTLQDYSEHCKHNESVVKEMLELAKNYNKAVEE	Colorectal tumors	2009	68
Reviewed	O00499	BIN1	Myc box-dependent-interacting protein 1	587	GVFPEnFTER	KESDWNQHKELEKCRGVFPENFTERVP--------------	Urine;Urine	2015;2015;	Unpublished;Unpublished;Unpublished
Reviewed	O00505	KPNA3	Importin subunit alpha-4	70	AQnVTLEAILQNA	NVPQEESLEDSDVDADFKAQNVTLEAILQNATSDNPVVQLS	Urine	2007	Unpublished
Reviewed	O00505	KPNA3	Importin subunit alpha-4	79	AQNVTLEAILQnA	DSDVDADFKAQNVTLEAILQNATSDNPVVQLSAVQAARKLL	Urine	2007	Unpublished
Reviewed	O00505	KPNA3	Importin subunit alpha-4	79	nATSDNPVVQLSAVQAAR	DSDVDADFKAQNVTLEAILQNATSDNPVVQLSAVQAARKLL	OVCAR-3 cell line (Ovarian cancer)	2015	1
Reviewed	O00507	USP9Y	Probable ubiquitin carboxyl-terminal hydrolase FAF-Y	244	FFnGSALNIQIIAALIKPFGQCYEFLSQHTLK	DLINKFGTLNGFQILHDRFFNGSALNIQIIAALIKPFGQCY	Serum	2015	Unpublished
Reviewed	O00533	CHL1	Neural cell adhesion molecule L1-like protein	87	IIPSnNSGTFR	FSWTKDGNPFYFTDHRIIPSNNSGTFRIPNEGHISHFQGKY	Urine;ovarian tumor;Urine;Plasma;Prostate;Colorectal tumor;Ovarian tumor;Urine;Serum;Urine;Urine;Plasma;Serum;Urine;Prostate tumor;Cerebrospinal fluid	2007;2011;2013;2014;2014;2014;2015;2015;2015;2015;2015;2015;2015;2007;2007;2007	54;45;13;14;22;8;10;Unpublished;Unpublished;Unpublished
Reviewed	O00533	CHL1	Neural cell adhesion molecule L1-like protein	87	DGNPFYFTDHRIIPSnNSGTFR	FSWTKDGNPFYFTDHRIIPSNNSGTFRIPNEGHISHFQGKY	Ovarian tumor	2015	Unpublished
Reviewed	O00533	CHL1	Neural cell adhesion molecule L1-like protein	367	VnGSPVDNHPFAGDVVFPR	NGILLCEAEGEPQPTIKWRVNGSPVDNHPFAGDVVFPREIS	Ovarian tumor	2015	Unpublished
Reviewed	O00533	CHL1	Neural cell adhesion molecule L1-like protein	394	TNLQPnHTAVY	HPFAGDVVFPREISFTNLQPNHTAVYQCEASNVHGTILANA	Liver	2014	33
Reviewed	O00533	CHL1	Neural cell adhesion molecule L1-like protein	394	ISFTNLQPnHTAVYQCE	HPFAGDVVFPREISFTNLQPNHTAVYQCEASNVHGTILANA	Serum	2013	42
Reviewed	O00533	CHL1	Neural cell adhesion molecule L1-like protein	394	EISFTNLQPnHTAVYQCEASNVHGTIL	HPFAGDVVFPREISFTNLQPNHTAVYQCEASNVHGTILANA	Urine;Urine;Prostate tumor	2007;2007;2007	Unpublished;Unpublished
Reviewed	O00533	CHL1	Neural cell adhesion molecule L1-like protein	394	EISFTNLQPnHTAVYQCEASNVHGTILANANIDVVDVRPLIQTK	HPFAGDVVFPREISFTNLQPNHTAVYQCEASNVHGTILANA	Serum	2015	Unpublished
Reviewed	O00533	CHL1	Neural cell adhesion molecule L1-like protein	476	nGTLQINR	SWQKVEEVKPLEGRRYHIYENGTLQINRTTEEDAGSYSCWV	OVCAR-3 cell line (Ovarian cancer)	2015	1
Reviewed	O00533	CHL1	Neural cell adhesion molecule L1-like protein	476	YHIYEnGTLQINR	SWQKVEEVKPLEGRRYHIYENGTLQINRTTEEDAGSYSCWV	Plasma;Urine;Serum;Urine;Liver;Ovarian tumor;Urine;Serum;Urine;Urine;Cerebrospinal fluid;Urine;Serum;Prostate tumor;Cerebrospinal fluid	2005;2007;2013;2013;2014;2015;2015;2015;2015;2015;2015;2007;2007;2007;2007	81;42;45;33;5;Unpublished;Unpublished;Unpublished;Unpublished
Reviewed	O00533	CHL1	Neural cell adhesion molecule L1-like protein	482	NGTLQInR	EVKPLEGRRYHIYENGTLQINRTTEEDAGSYSCWVENAIGK	OVCAR-3 cell line (Ovarian cancer)	2015	1
Reviewed	O00533	CHL1	Neural cell adhesion molecule L1-like protein	482	YHIYENGTLQInR	EVKPLEGRRYHIYENGTLQINRTTEEDAGSYSCWVENAIGK	Plasma;Urine;Serum;Urine;Liver;Ovarian tumor;Urine;Serum;Urine;Urine;Cerebrospinal fluid;Urine;Serum;Prostate tumor;Cerebrospinal fluid	2005;2007;2013;2013;2014;2015;2015;2015;2015;2015;2015;2007;2007;2007;2007	81;42;45;33;5;Unpublished;Unpublished;Unpublished;Unpublished
Reviewed	O00533	CHL1	Neural cell adhesion molecule L1-like protein	562	DGEAFEInGTEDGR	SHLKHSLKLSWSKDGEAFEINGTEDGRIIIDGANLTISNVT	Plasma;Serum;ovarian tumor;Urine;Plasma;Prostate;DLBCL cell lines (Diffuse large B-cell lymphoma);Colorectal tumor;Ovarian tumor;OVCAR-3 cell line (Ovarian cancer);Prostate tumor;Urine;Serum;Urine;Cerebrospinal fluid;Serum;Prostate tumor;Ovarian tumor;Cerebrospinal fluid	2005;2010;2011;2013;2014;2014;2014;2014;2015;2015;2015;2015;2015;2015;2015;2007;2007;2007;2007	81;40;54;45;13;14;16;22;1;5;Unpublished;Unpublished;Unpublished;Unpublished
Reviewed	O00533	CHL1	Neural cell adhesion molecule L1-like protein	641	LTWEAGADHNSnISEYIVEFEGNK	SERQNRSVRLTWEAGADHNSNISEYIVEFEGNKEEPGRWEE	Ovarian tumor;Serum;Serum	2015;2015;2015	Unpublished;Unpublished;10
Reviewed	O00533	CHL1	Neural cell adhesion molecule L1-like protein	641	LTWEAGADHNSnISEYIVEFEGNKEEPGR	SERQNRSVRLTWEAGADHNSNISEYIVEFEGNKEEPGRWEE	Ovarian tumor;Serum;Plasma;Prostate tumor;Cerebrospinal fluid	2015;2015;2015;2007;2007	8;Unpublished;Unpublished
Reviewed	O00533	CHL1	Neural cell adhesion molecule L1-like protein	641	LTWEAGADHNSnISEYIVEFEGNKEEPGRWEELTR	SERQNRSVRLTWEAGADHNSNISEYIVEFEGNKEEPGRWEE	Serum	2015	Unpublished
Reviewed	O00533	CHL1	Neural cell adhesion molecule L1-like protein	767	EEETVTnHTIRVM	YRVTWKPQGAPVEWEEETVTNHTLRVMTPAVYAPYDVKVQA	Breast Cancer cell lines	2013	37
Reviewed	O00533	CHL1	Neural cell adhesion molecule L1-like protein	767	VTWKPQGAPVEWEEETVTnHTIR	YRVTWKPQGAPVEWEEETVTNHTLRVMTPAVYAPYDVKVQA	DLBCL cell lines (Diffuse large B-cell lymphoma)	2014	16
Reviewed	O00533	CHL1	Neural cell adhesion molecule L1-like protein	767	VTWKPQGAPVEWEEETVTnHTLR	YRVTWKPQGAPVEWEEETVTNHTLRVMTPAVYAPYDVKVQA	Plasma;Urine;Serum;Urine;plasma;Serum;Colorectal tumor;Ovarian tumor;Urine;Serum;Urine;Cerebrospinal fluid;Plasma;Serum;Urine;Serum;Prostate tumor;Cerebrospinal fluid	2005;2007;2013;2013;2013;2014;2014;2015;2015;2015;2015;2015;2015;2015;2007;2007;2007;2007	81;42;45;45;35;22;5;8;10;Unpublished;Unpublished;Unpublished;Unpublished
Reviewed	O00533	CHL1	Neural cell adhesion molecule L1-like protein	822	PVIHGVDVInSTLVK	LYSGEDYPDTAPVIHGVDVINSTLVKVTWSTVPKDRVHGRL	Urine;Urine;Prostate tumor	2007;2007;2007	Unpublished;Unpublished
Reviewed	O00533	CHL1	Neural cell adhesion molecule L1-like protein	822	VQAINQLGSGPDPQSVTLYSGEDYPDTAPVIHGVDVInSTLVK	LYSGEDYPDTAPVIHGVDVINSTLVKVTWSTVPKDRVHGRL	Plasma;Plasma;OVCAR-3 cell line (Ovarian cancer);Serum	2005;2014;2015;2015	81;13;1;Unpublished
Reviewed	O00533	CHL1	Neural cell adhesion molecule L1-like protein	1026	ISGVnLTQK	TEESSTLGEGSKGIGKISGVNLTQKTHPIEVFEPGAEHIVR	Plasma;Urine;Urine;Plasma;Colorectal tumor;Ovarian tumor;Urine;Urine;Plasma;Serum;Urine;Prostate tumor	2005;2007;2013;2014;2014;2015;2015;2015;2015;2015;2007;2007	81;45;13;22;8;10;Unpublished;Unpublished
Reviewed	O00533	CHL1	Neural cell adhesion molecule L1-like protein	1055	NWGDnDSIFQDVIETR	EVFEPGAEHIVRLMTKNWGDNDSIFQDVIETRGREYAGLYD	Urine;Urine	2015;2015;	Unpublished;Unpublished;Unpublished
Reviewed	O00555	CACNA1A	Voltage-dependent P/Q-type calcium channel subunit alpha-1A	1100	MGnSTDPGPMLAIPAMATNPQNAASRR	AAPHGSLGHAGLPQSPAKMGNSTDPGPMLAIPAMATNPQNA	Serum;Prostate tumor	2007;2007	Unpublished;Unpublished
Reviewed	O00567	NOP56	Nucleolar protein 56	207	IINDnATYCR	MRVREWYGYHFPELVKIINDNATYCRLAQFIGNRRELNEDK	HCC cell lines (Liver); Jurkat T cell line;DLBCL cell lines (Diffuse large B-cell lymphoma);Non-small Cell Lung Carcinoma;OVCAR-3 cell line (Ovarian cancer);Breast cancer xenografts	2013;2014;2014;2014;2015;2015	40;13;16;18;1;Unpublished
Reviewed	O00567	NOP56	Nucleolar protein 56	207	VKIINDnATYCRI	MRVREWYGYHFPELVKIINDNATYCRLAQFIGNRRELNEDK	Breast Cancer cell lines	2013	37
Reviewed	O00571	DDX3X	ATP-dependent RNA helicase DDX3X	22	nSSDNQSGGSTASK	SHVAVENALGLDQQFAGLDLNSSDNQSGGSTASKGRYIPPH	OVCAR-3 cell line (Ovarian cancer)	2015	1
Reviewed	O00571	DDX3X	ATP-dependent RNA helicase DDX3X	22	SHVAVENALGLDQQFAGLDLnSSDNQSGGSTASK	SHVAVENALGLDQQFAGLDLNSSDNQSGGSTASKGRYIPPH	Colorectal tumors	2009	68
Reviewed	O00571	DDX3X	ATP-dependent RNA helicase DDX3X	26	NSSDnQSGGSTASK	VENALGLDQQFAGLDLNSSDNQSGGSTASKGRYIPPHLRNR	OVCAR-3 cell line (Ovarian cancer)	2015	1
Reviewed	O00571	DDX3X	ATP-dependent RNA helicase DDX3X	26	SHVAVENALGLDQQFAGLDLNSSDnQSGGSTASK	VENALGLDQQFAGLDLNSSDNQSGGSTASKGRYIPPHLRNR	Colorectal tumors	2009	68
Reviewed	O00571	DDX3X	ATP-dependent RNA helicase DDX3X	414	VGSTSEnITQK	RDFLDEYIFLAVGRVGSTSENITQKVVWVEESDKRSFLLDL	Urine;Urine	2015;2015;	Unpublished;Unpublished;Unpublished
Reviewed	O00584	RNASET2	Ribonuclease T2	76	DKSEGCnRSWPFN	RDPPDYWTIHGLWPDKSEGCNRSWPFNLEEIKDLLPEMRAY	Breast Cancer cell lines	2013	37
Reviewed	O00584	RNASET2	Ribonuclease T2	76	SEGCnRSWPFNLEEIK	RDPPDYWTIHGLWPDKSEGCNRSWPFNLEEIKDLLPEMRAY	HuH-7 cell line (Liver)	2013	38
Reviewed	O00584	RNASET2	Ribonuclease T2	76	DPPDYWTIHGLWPDKSEGCnR	RDPPDYWTIHGLWPDKSEGCNRSWPFNLEEIKDLLPEMRAY	Liver	2014	33
Reviewed	O00584	RNASET2	Ribonuclease T2	76	CRDPPDYWTIHGLWPDKSEGCnR	RDPPDYWTIHGLWPDKSEGCNRSWPFNLEEIKDLLPEMRAY	Liver	2014	33
Reviewed	O00584	RNASET2	Ribonuclease T2	76	DCRDPPDYWTIHGLWPDKSEGCnR	RDPPDYWTIHGLWPDKSEGCNRSWPFNLEEIKDLLPEMRAY	Liver	2014	33
Reviewed	O00584	RNASET2	Ribonuclease T2	76	IQNDCRDPPDYWTIHGIWPDKSEGCnR	RDPPDYWTIHGLWPDKSEGCNRSWPFNLEEIKDLLPEMRAY	DLBCL cell lines (Diffuse large B-cell lymphoma)	2014	16
Reviewed	O00584	RNASET2	Ribonuclease T2	106	AYWPDVIHSFPnR	IKDLLPEMRAYWPDVIHSFPNRSRFWKHEWEKHGTCAAQVD	DLBCL cell lines (Diffuse large B-cell lymphoma);Liver;LNCap/PC3 cell lines (Prostate cancer);Breast cancer xenografts;Urine;Urine;Serum	2014;2014;2015;2015;2015;2015;2015;	16;33;2;Unpublished;Unpublished;Unpublished;10;Unpublished
Reviewed	O00584	RNASET2	Ribonuclease T2	106	VIHSFPnRSRFWK	IKDLLPEMRAYWPDVIHSFPNRSRFWKHEWEKHGTCAAQVD	Breast Cancer cell lines	2013	37
Reviewed	O00584	RNASET2	Ribonuclease T2	212	QDQQLQnCTEP	EVQTIGQIELCLTKQDQQLQNCTEPGEQPSPKQEVWLANGA	Prostate;Prostate tumor	2014;2015	14;Unpublished
Reviewed	O00584	RNASET2	Ribonuclease T2	212	nCTEPGEQPSPK	EVQTIGQIELCLTKQDQQLQNCTEPGEQPSPKQEVWLANGA	Prostate;OVCAR-3 cell line (Ovarian cancer);Prostate tumor	2014;2015;2015	14;1;Unpublished
Reviewed	O00584	RNASET2	Ribonuclease T2	212	QDQQLQnCTEPG	EVQTIGQIELCLTKQDQQLQNCTEPGEQPSPKQEVWLANGA	IGROV-1/CP cell line (Ovarian cancer)IGROV-1/CP;Prostate;Prostate tumor	2007;2014;2015	75;14;Unpublished
Reviewed	O00584	RNASET2	Ribonuclease T2	212	QDQQIQnCTEPGE	EVQTIGQIELCLTKQDQQLQNCTEPGEQPSPKQEVWLANGA	Breast Cancer cell lines	2013	37
Reviewed	O00584	RNASET2	Ribonuclease T2	212	QDQQIQnCTEPGEQPSPK	EVQTIGQIELCLTKQDQQLQNCTEPGEQPSPKQEVWLANGA	DLBCL cell lines (Diffuse large B-cell lymphoma)	2014	16
Reviewed	O00584	RNASET2	Ribonuclease T2	212	QDQQLQnCTEPGEQPSPK	EVQTIGQIELCLTKQDQQLQNCTEPGEQPSPKQEVWLANGA	Urine;TPC-1 Cell Line (Thyroid Cance);HCCLM3 cell line (Liver);Prostate stromal cell line;Breast cell lines;HepG2 cell line (Liver);HuH-7 cell line (Liver); HCC cell lines (Liver);Urine;Prostate;HEK293 cell line (embryonic kidney);Non-small Cell Lung Carcinoma;Liver;Ovarian tumor;OVCAR-3 cell line (Ovarian cancer);LNCap/PC3 cell lines (Prostate cancer);Breast cancer xenografts;Prostate tumor;Urin…	2007;2009;2009;2009;2012;2013;2013;2013;2013;2014;2014;2014;2014;2015;2015;2015;2015;2015;2015;2015;2015;2007;2007;2007;2007;2007	62;63;65;52;38;38;40;45;14;15;18;33;1;2;10;Unpublished;Unpublished;Unpublished;Unpublished;Unpublished
Reviewed	O00587	MFNG	Beta-1,3-N-acetylglucosaminyltransferase manic fringe	109	IGSHIVVTnCSAEHSHPAISCK	FTDSPDKGLQERLGSHLVVTNCSAEHSHPALSCKMAAEFDT	DLBCL cell lines (Diffuse large B-cell lymphoma)	2014	16
Reviewed	O00587	MFNG	Beta-1,3-N-acetylglucosaminyltransferase manic fringe	109	LGSHLVVTnCSAEHSHPALSCK	FTDSPDKGLQERLGSHLVVTNCSAEHSHPALSCKMAAEFDT	HepG2 cell line (Liver)	2013	38
Reviewed	O00587	MFNG	Beta-1,3-N-acetylglucosaminyltransferase manic fringe	109	GLQERLGSHLVVTnCSAEHSHPALSCK	FTDSPDKGLQERLGSHLVVTNCSAEHSHPALSCKMAAEFDT	HepG2 cell line (Liver)	2013	38
Reviewed	O00587	MFNG	Beta-1,3-N-acetylglucosaminyltransferase manic fringe	185	DVYVGRPSINRPIHASEPQPHnR	VYVGRPSLNRPIHASEPQPHNRTRLVQFWFATGGAGFCINR	DLBCL cell lines (Diffuse large B-cell lymphoma)	2014	16
Reviewed	O00592	PODXL	Podocalyxin	33	nATQTTTDSSNK	LLSTPPLLPSSPSPSPSPSQNATQTTTDSSNKTAPTPASSV	OVCAR-3 cell line (Ovarian cancer)	2015	1
Reviewed	O00592	PODXL	Podocalyxin	43	NATQTTTDSSnK	SPSPSPSPSQNATQTTTDSSNKTAPTPASSVTIMATDTAQQ	OVCAR-3 cell line (Ovarian cancer)	2015	1
Reviewed	O00592	PODXL	Podocalyxin	104	ATTLGVSSDSPGTTTLAQQVSGPVnTTVAR	GVSSDSPGTTTLAQQVSGPVNTTVARGGGSGNPTTTIESPK	HEK293 cell line (embryonic kidney);LNCap/PC3 cell lines (Prostate cancer);Breast cancer xenografts;Urine;Urine	2014;2015;2015;2015;2015;	15;2;Unpublished;Unpublished;Unpublished;Unpublished
Reviewed	O00592	PODXL	Podocalyxin	144	SADTTTVATSTATAKPnTTSSQNGAEDTTNSGGK	KSTKSADTTTVATSTATAKPNTTSSQNGAEDTTNSGGKSSH	Breast cell lines;Ovarian tumor	2012;2015	52;Unpublished
Reviewed	O00592	PODXL	Podocalyxin	360	EKQIVInITGNTI	NWAKCEDLETQTQSEKQLVLNLTGNTLCAGGASDEKLISLI	Breast Cancer cell lines	2013	37
Reviewed	O00592	PODXL	Podocalyxin	360	nLTGNTLCAGGASDEK	NWAKCEDLETQTQSEKQLVLNLTGNTLCAGGASDEKLISLI	OVCAR-3 cell line (Ovarian cancer)	2015	1
Reviewed	O00592	PODXL	Podocalyxin	360	QIVInITGNTICAGGASDEK	NWAKCEDLETQTQSEKQLVLNLTGNTLCAGGASDEKLISLI	DLBCL cell lines (Diffuse large B-cell lymphoma)	2014	16
Reviewed	O00592	PODXL	Podocalyxin	360	QLVLnLTGNTLCAGGASDEK	NWAKCEDLETQTQSEKQLVLNLTGNTLCAGGASDEKLISLI	IGROV-1/CP cell line (Ovarian cancer)IGROV-1/CP;ARO Cell Line (Thyroid Cance);HeLa cell line (Cervical cancer);Pancreatic islets;Breast cell lines;Ovarian tumor;Urine;HEK293 cell line (embryonic kidney);Hela cell line (cervical cancer);Ovarian tumor;OVCAR-3 cell line (Ovarian cancer);LNCap/PC3 cell lines (Prostate cancer);Breast cancer xenografts;Prostate tumor;Urine;Urine;HEK293T cell line (embr…	2007;2009;2009;2012;2012;2013;2013;2014;2014;2015;2015;2015;2015;2015;2015;2015;2015;2015;2015;2007;2007	75;62;67;48;52;34;45;15;17;1;2;9;10;12;Unpublished;Unpublished
Reviewed	O00592	PODXL	Podocalyxin	360	QLVLnLTGNTLCAGGASDEKLISLICR	NWAKCEDLETQTQSEKQLVLNLTGNTLCAGGASDEKLISLI	Breast cell lines;HEK293 cell line (embryonic kidney);Hela cell line (cervical cancer)	2012;2014;2015	52;15;12
Reviewed	O00592	PODXL	Podocalyxin	544	VVSLNGELGDSWIVPLDnLTK	EKKVVSLNGELGDSWIVPLDNLTKDDLDEEEDTHL------	Breast cell lines	2012	52
Reviewed	O00624	SLC17A2	Sodium-dependent phosphate transport protein 3	47	VSLSIAIIAMVnTTQ	SNFTMITQRVSLSIAIIAMVNTTQQQGLSNASTEGPVADAF	Urine;Prostate tumor	2007;2007	Unpublished
Reviewed	O00624	SLC17A2	Sodium-dependent phosphate transport protein 3	56	SnASTEGPVADAFNNSSISIK	VSLSIAIIAMVNTTQQQGLSNASTEGPVADAFNNSSISIKE	Serum;Prostate tumor	2007;2007	Unpublished;Unpublished
Reviewed	O00624	SLC17A2	Sodium-dependent phosphate transport protein 3	68	SNASTEGPVADAFnNSSISIK	TTQQQGLSNASTEGPVADAFNNSSISIKEFDTKASVYQWSP	Serum;Prostate tumor	2007;2007	Unpublished;Unpublished
Reviewed	O00624	SLC17A2	Sodium-dependent phosphate transport protein 3	69	SNASTEGPVADAFNnSSISIK	TQQQGLSNASTEGPVADAFNNSSISIKEFDTKASVYQWSPE	Serum;Prostate tumor	2007;2007	Unpublished;Unpublished
Reviewed	O00629	KPNA4	Importin subunit alpha-3	79	nASSDNQGIQLSAVQAAR	DSDIDGDYRVQNTSLEAIVQNASSDNQGIQLSAVQAARKLL	OVCAR-3 cell line (Ovarian cancer)	2015	1
Reviewed	O00634	NTN3	Netrin-3	387	nQTTGQCPCK	DRRACRACDCHPVGAAGKTCNQTTGQCPCKDGVTGLTCNRC	OVCAR-3 cell line (Ovarian cancer)	2015	1
Reviewed	O00634	NTN3	Netrin-3	387	TCnQTTGQCPCK	DRRACRACDCHPVGAAGKTCNQTTGQCPCKDGVTGLTCNRC	Colorectal tumor;Prostate tumor;Prostate cancer cell lines;Ovarian tumor	2014;2007;2007;2007	22;Unpublished;Unpublished;Unpublished
Reviewed	O00634	NTN3	Netrin-3	387	AAGKTCnQTTGQC	DRRACRACDCHPVGAAGKTCNQTTGQCPCKDGVTGLTCNRC	Breast Cancer cell lines	2013	37
Reviewed	O00634	NTN3	Netrin-3	387	TCnQTTGQCPCKDGVTGITCNR	DRRACRACDCHPVGAAGKTCNQTTGQCPCKDGVTGLTCNRC	Non-small Cell Lung Carcinoma	2014	18
Reviewed	O00634	NTN3	Netrin-3	387	TCnQTTGQCPCKDGVTGLTCNR	DRRACRACDCHPVGAAGKTCNQTTGQCPCKDGVTGLTCNRC	Non-small Cell Lung Carcinoma	2014	18
Reviewed	O00635	TRIM38	E3 ubiquitin-protein ligase TRIM38	249	LLQNVnDTLSR	HILELEEKCQGSAQKLLQNVNDTLSRSWAVKLETSEAVSLE	Urine;Urine	2015;2015;	Unpublished;Unpublished;Unpublished
Reviewed	O00712	NFIB	Nuclear factor 1 B-type	219	SGVFnVSELVR	DPAKNPPGYLEDSFVKSGVFNVSELVRVSRTPITQGTGVNF	Urine;Urine;Urine	2015;2015;2015;	Unpublished;Unpublished;Unpublished;Unpublished
Reviewed	O00748	CES2	Cocaine esterase	111	LSQFnMTF	HPAMCLQDLTAVESEFLSQFNMTFPSDSMSEDCLYLSIYTP	Liver	2009	64
Reviewed	O00748	CES2	Cocaine esterase	111	nMTFPSDSMSE	HPAMCLQDLTAVESEFLSQFNMTFPSDSMSEDCLYLSIYTP	Liver	2014	33
Reviewed	O00748	CES2	Cocaine esterase	111	SQFnMTFPSDSMSE	HPAMCLQDLTAVESEFLSQFNMTFPSDSMSEDCLYLSIYTP	Liver	2014	33
Reviewed	O00748	CES2	Cocaine esterase	111	nMTFPSDSMSEDCLY	HPAMCLQDLTAVESEFLSQFNMTFPSDSMSEDCLYLSIYTP	Liver	2014	33
Reviewed	O00748	CES2	Cocaine esterase	111	FLSQFnMTFPSDSMSE	HPAMCLQDLTAVESEFLSQFNMTFPSDSMSEDCLYLSIYTP	Liver	2014	33
Reviewed	O00748	CES2	Cocaine esterase	111	nMTFPSDSMSEDCLYL	HPAMCLQDLTAVESEFLSQFNMTFPSDSMSEDCLYLSIYTP	Liver	2014	33
Reviewed	O00748	CES2	Cocaine esterase	111	SEFLSQFnMTFPSDSMSE	HPAMCLQDLTAVESEFLSQFNMTFPSDSMSEDCLYLSIYTP	Liver	2014	33
Reviewed	O00748	CES2	Cocaine esterase	111	SQFnMTFPSDSMSEDCLY	HPAMCLQDLTAVESEFLSQFNMTFPSDSMSEDCLYLSIYTP	Liver	2014	33
Reviewed	O00748	CES2	Cocaine esterase	111	LSQFnMTFPSDSMSEDCLY	HPAMCLQDLTAVESEFLSQFNMTFPSDSMSEDCLYLSIYTP	Liver	2014	33
Reviewed	O00748	CES2	Cocaine esterase	111	FLSQFnMTFPSDSMSEDCLY	HPAMCLQDLTAVESEFLSQFNMTFPSDSMSEDCLYLSIYTP	Liver	2014	33
Reviewed	O00748	CES2	Cocaine esterase	276	VVAnLSACDQVDSE	VALLPGLIASSADVISTVVANLSACDQVDSEALVGCLRGKS	Liver	2014	33
Reviewed	O00748	CES2	Cocaine esterase	276	VVAnLSACDQVDSEAL	VALLPGLIASSADVISTVVANLSACDQVDSEALVGCLRGKS	Liver	2014	33
Reviewed	O00748	CES2	Cocaine esterase	276	HGAIMESGVALLPGLIASSADVISTVVAnL	VALLPGLIASSADVISTVVANLSACDQVDSEALVGCLRGKS	Liver	2014	33
Reviewed	O00754	MAN2B1	Lysosomal alpha-mannosidase	133	nATQEVVR	TRRFIYVEIAFFSRWWHQQTNATQEVVRDLVRQGRLEFANG	OVCAR-3 cell line (Ovarian cancer)	2015	1
Reviewed	O00754	MAN2B1	Lysosomal alpha-mannosidase	133	WWHQQTnAT	TRRFIYVEIAFFSRWWHQQTNATQEVVRDLVRQGRLEFANG	Liver	2014	33
Reviewed	O00754	MAN2B1	Lysosomal alpha-mannosidase	133	WWHQQTnATQE	TRRFIYVEIAFFSRWWHQQTNATQEVVRDLVRQGRLEFANG	Liver	2014	33
Reviewed	O00754	MAN2B1	Lysosomal alpha-mannosidase	133	HQQTnATQEVVR	TRRFIYVEIAFFSRWWHQQTNATQEVVRDLVRQGRLEFANG	Liver	2014	33
Reviewed	O00754	MAN2B1	Lysosomal alpha-mannosidase	133	WHQQTnATQEVVR	TRRFIYVEIAFFSRWWHQQTNATQEVVRDLVRQGRLEFANG	Liver	2014	33
Reviewed	O00754	MAN2B1	Lysosomal alpha-mannosidase	133	WWHQQTnATQEVV	TRRFIYVEIAFFSRWWHQQTNATQEVVRDLVRQGRLEFANG	Breast Cancer cell lines	2013	37
Reviewed	O00754	MAN2B1	Lysosomal alpha-mannosidase	133	HQQTnATQEVVRDL	TRRFIYVEIAFFSRWWHQQTNATQEVVRDLVRQGRLEFANG	Liver	2014	33
Reviewed	O00754	MAN2B1	Lysosomal alpha-mannosidase	133	WWHQQTnATQEVVR	TRRFIYVEIAFFSRWWHQQTNATQEVVRDLVRQGRLEFANG	Urine;TPC-1 Cell Line (Thyroid Cance);XTC-1 Cell Line (Thyroid Cance);DRO-1 Cell Line (Thyroid Cance);Breast cell lines; HCC cell lines (Liver);DLBCL cell lines (Diffuse large B-cell lymphoma);K562A cell line (Leukemia);Liver;Ovarian tumor;OVCAR-3 cell line (Ovarian cancer);LNCap/PC3 cell lines (Prostate cancer);Breast cancer xenografts;Urine;Urine;Urine;Prostate tumor	2007;2009;2009;2009;2012;2013;2014;2014;2014;2015;2015;2015;2015;2015;2015;2007;2007	62;62;62;52;40;16;25;33;1;2;Unpublished;Unpublished
Reviewed	O00754	MAN2B1	Lysosomal alpha-mannosidase	133	WHQQTnATQEVVRDL	TRRFIYVEIAFFSRWWHQQTNATQEVVRDLVRQGRLEFANG	Liver	2014	33
Reviewed	O00754	MAN2B1	Lysosomal alpha-mannosidase	310	RTnHTVMTMGSDF	KELVDYFLNVATAQGRYYRTNHTVMTMGSDFQYENANMWFK	Liver	2014	33
Reviewed	O00754	MAN2B1	Lysosomal alpha-mannosidase	310	YRTnHTVMTMGSDF	KELVDYFLNVATAQGRYYRTNHTVMTMGSDFQYENANMWFK	Liver	2014	33
Reviewed	O00754	MAN2B1	Lysosomal alpha-mannosidase	310	TnHTVMTMGSDFQYE	KELVDYFLNVATAQGRYYRTNHTVMTMGSDFQYENANMWFK	Liver	2014	33
Reviewed	O00754	MAN2B1	Lysosomal alpha-mannosidase	310	TnHTVMTMGSDFQYENANMWFK	KELVDYFLNVATAQGRYYRTNHTVMTMGSDFQYENANMWFK	Jurkat T cell line;DLBCL cell lines (Diffuse large B-cell lymphoma);Liver;Ovarian tumor;LNCap/PC3 cell lines (Prostate cancer)	2014;2014;2014;2015;2015	13;16;33;Unpublished;2
Reviewed	O00754	MAN2B1	Lysosomal alpha-mannosidase	367	AnITWSVK	SSVHVLYSTPACYLWELNKANLTWSVKHDDFFPYADGPHQF	DLBCL cell lines (Diffuse large B-cell lymphoma)	2014	16
Reviewed	O00754	MAN2B1	Lysosomal alpha-mannosidase	367	AnLTWSVK	SSVHVLYSTPACYLWELNKANLTWSVKHDDFFPYADGPHQF	Urine;TPC-1 Cell Line (Thyroid Cance);XTC-1 Cell Line (Thyroid Cance);HCCLM3 cell line (Liver);HEK293T cell line (embryonic kidney);Pancreatic isletsJurkat T cell line;Liver;Colorectal tumor;Liver;Ovarian tumor;OVCAR-3 cell line (Ovarian cancer);Platelet;LNCap/PC3 cell lines (Prostate cancer);Breast cancer xenografts;Urine;Urine;Hela cell line (cervical cancer);Urine;Prostate tumor;Ovarian tumor	2007;2009;2009;2009;2011;2012;2014;2014;2014;2014;2015;2015;2015;2015;2015;2015;2015;2015;2007;2007;2007	62;62;63;57;48;13;19;22;33;1;2;12;Unpublished;Unpublished;Unpublished
Reviewed	O00754	MAN2B1	Lysosomal alpha-mannosidase	367	ELNKAnLTW	SSVHVLYSTPACYLWELNKANLTWSVKHDDFFPYADGPHQF	Liver	2014	33
Reviewed	O00754	MAN2B1	Lysosomal alpha-mannosidase	367	LWELNKAnL	SSVHVLYSTPACYLWELNKANLTWSVKHDDFFPYADGPHQF	Liver	2014	33
Reviewed	O00754	MAN2B1	Lysosomal alpha-mannosidase	367	LNKAnLTWSVK	SSVHVLYSTPACYLWELNKANLTWSVKHDDFFPYADGPHQF	Liver	2014	33
Reviewed	O00754	MAN2B1	Lysosomal alpha-mannosidase	367	LWELNKAnLTW	SSVHVLYSTPACYLWELNKANLTWSVKHDDFFPYADGPHQF	Liver	2014	33
Reviewed	O00754	MAN2B1	Lysosomal alpha-mannosidase	367	WEINKAnITWSVK	SSVHVLYSTPACYLWELNKANLTWSVKHDDFFPYADGPHQF	Breast Cancer cell lines	2013	37
Reviewed	O00754	MAN2B1	Lysosomal alpha-mannosidase	367	NKAnLTWSVKHDDF	SSVHVLYSTPACYLWELNKANLTWSVKHDDFFPYADGPHQF	Liver	2009	64
Reviewed	O00754	MAN2B1	Lysosomal alpha-mannosidase	497	nISICPLSQTAAR	SNALARLRGFKDHFTFCQQLNISICPLSQTAARFQVIVYNP	OVCAR-3 cell line (Ovarian cancer)	2015	1
Reviewed	O00754	MAN2B1	Lysosomal alpha-mannosidase	497	CQQLnISICPLSQTAAR	SNALARLRGFKDHFTFCQQLNISICPLSQTAARFQVIVYNP	Liver	2014	33
Reviewed	O00754	MAN2B1	Lysosomal alpha-mannosidase	645	FWYnASIGDNE	EIMNMNQQLLLPVRQTFFWYNASIGDNESDQASGAYIFRPN	Liver	2014	33
Reviewed	O00754	MAN2B1	Lysosomal alpha-mannosidase	645	WYnASIGDNESDQASGAY	EIMNMNQQLLLPVRQTFFWYNASIGDNESDQASGAYIFRPN	Liver	2014	33
Reviewed	O00754	MAN2B1	Lysosomal alpha-mannosidase	645	FWYnASIGDNESDQASGAY	EIMNMNQQLLLPVRQTFFWYNASIGDNESDQASGAYIFRPN	Liver	2014	33
Reviewed	O00754	MAN2B1	Lysosomal alpha-mannosidase	645	QTFFWYnASIGDNESDQASGAYIFRPNQQKPIPVSR	EIMNMNQQLLLPVRQTFFWYNASIGDNESDQASGAYIFRPN	DLBCL cell lines (Diffuse large B-cell lymphoma)	2014	16
Reviewed	O00754	MAN2B1	Lysosomal alpha-mannosidase	645	QTFFWYnASIGDNESDQASGAYIFRPNQQKPLPVSR	EIMNMNQQLLLPVRQTFFWYNASIGDNESDQASGAYIFRPN	Ovarian tumor;LNCap/PC3 cell lines (Prostate cancer)	2015;2015	Unpublished;2
Reviewed	O00754	MAN2B1	Lysosomal alpha-mannosidase	651	FWYNASIGDnE	QQLLLPVRQTFFWYNASIGDNESDQASGAYIFRPNQQKPLP	Liver	2014	33
Reviewed	O00754	MAN2B1	Lysosomal alpha-mannosidase	651	WYNASIGDnESDQASGAY	QQLLLPVRQTFFWYNASIGDNESDQASGAYIFRPNQQKPLP	Liver	2014	33
Reviewed	O00754	MAN2B1	Lysosomal alpha-mannosidase	651	FWYNASIGDnESDQASGAY	QQLLLPVRQTFFWYNASIGDNESDQASGAYIFRPNQQKPLP	Liver	2014	33
Reviewed	O00754	MAN2B1	Lysosomal alpha-mannosidase	651	QTFFWYNASIGDnESDQASGAYIFRPNQQKPIPVSR	QQLLLPVRQTFFWYNASIGDNESDQASGAYIFRPNQQKPLP	DLBCL cell lines (Diffuse large B-cell lymphoma)	2014	16
Reviewed	O00754	MAN2B1	Lysosomal alpha-mannosidase	651	QTFFWYNASIGDnESDQASGAYIFRPNQQKPLPVSR	QQLLLPVRQTFFWYNASIGDNESDQASGAYIFRPNQQKPLP	Ovarian tumor;LNCap/PC3 cell lines (Prostate cancer)	2015;2015	Unpublished;2
Reviewed	O00754	MAN2B1	Lysosomal alpha-mannosidase	692	VHQnF	VSRWAQIHLVKTPLVQEVHQNFSAWCSQVVRLYPGQRHLEL	Liver	2014	33
Reviewed	O00754	MAN2B1	Lysosomal alpha-mannosidase	692	VHQnFSAW	VSRWAQIHLVKTPLVQEVHQNFSAWCSQVVRLYPGQRHLEL	Liver	2014	33
Reviewed	O00754	MAN2B1	Lysosomal alpha-mannosidase	692	VQEVHQnF	VSRWAQIHLVKTPLVQEVHQNFSAWCSQVVRLYPGQRHLEL	Liver	2014	33
Reviewed	O00754	MAN2B1	Lysosomal alpha-mannosidase	692	nFSAWCSQVVR	VSRWAQIHLVKTPLVQEVHQNFSAWCSQVVRLYPGQRHLEL	OVCAR-3 cell line (Ovarian cancer)	2015	1
Reviewed	O00754	MAN2B1	Lysosomal alpha-mannosidase	692	TPLVQEVHQnF	VSRWAQIHLVKTPLVQEVHQNFSAWCSQVVRLYPGQRHLEL	Liver	2014	33
Reviewed	O00754	MAN2B1	Lysosomal alpha-mannosidase	692	VQEVHQnFSAW	VSRWAQIHLVKTPLVQEVHQNFSAWCSQVVRLYPGQRHLEL	Liver	2014	33
Reviewed	O00754	MAN2B1	Lysosomal alpha-mannosidase	692	VKTPLVQEVHQnF	VSRWAQIHLVKTPLVQEVHQNFSAWCSQVVRLYPGQRHLEL	Liver	2014	33
Reviewed	O00754	MAN2B1	Lysosomal alpha-mannosidase	692	VQEVHQnFSAWCS	VSRWAQIHLVKTPLVQEVHQNFSAWCSQVVRLYPGQRHLEL	Breast Cancer cell lines	2013	37
Reviewed	O00754	MAN2B1	Lysosomal alpha-mannosidase	692	TPLVQEVHQnFSAW	VSRWAQIHLVKTPLVQEVHQNFSAWCSQVVRLYPGQRHLEL	Liver	2014	33
Reviewed	O00754	MAN2B1	Lysosomal alpha-mannosidase	692	VHQnFSAWCSQVVR	VSRWAQIHLVKTPLVQEVHQNFSAWCSQVVRLYPGQRHLEL	Liver	2014	33
Reviewed	O00754	MAN2B1	Lysosomal alpha-mannosidase	692	TPIVQEVHQnFSAWCSQVVR	VSRWAQIHLVKTPLVQEVHQNFSAWCSQVVRLYPGQRHLEL	Spermatozoa;DLBCL cell lines (Diffuse large B-cell lymphoma)	2013;2014	43;16
Reviewed	O00754	MAN2B1	Lysosomal alpha-mannosidase	692	TPLVQEVHQnFSAWCSQVVR	VSRWAQIHLVKTPLVQEVHQNFSAWCSQVVRLYPGQRHLEL	TPC-1 Cell Line (Thyroid Cance);XTC-1 Cell Line (Thyroid Cance);ARO Cell Line (Thyroid Cance);DRO-1 Cell Line (Thyroid Cance);Colorectal cancer cell line, HCT-116 (colorectal cancer);Breast cell lines; HCC cell lines (Liver);Non-small Cell Lung Carcinoma;Liver;Ovarian tumor;OVCAR-3 cell line (Ovarian cancer);LNCap/PC3 cell lines (Prostate cancer);Breast cancer xenografts;Prostate tumor;Breast tum…	2009;2009;2009;2009;2011;2012;2013;2014;2014;2015;2015;2015;2015;2007;2007;2007;2007	62;62;62;62;58;52;40;18;33;1;2;Unpublished;Unpublished;Unpublished;Unpublished
Reviewed	O00754	MAN2B1	Lysosomal alpha-mannosidase	766	KLnQTEPVAGN	DSNGREILERRRDYRPTWKLNQTEPVAGNYYPVNTRIYITD	Liver	2014	33
Reviewed	O00754	MAN2B1	Lysosomal alpha-mannosidase	766	LnQTEPVAGNY	DSNGREILERRRDYRPTWKLNQTEPVAGNYYPVNTRIYITD	Liver	2014	33
Reviewed	O00754	MAN2B1	Lysosomal alpha-mannosidase	766	KLnQTEPVAGNY	DSNGREILERRRDYRPTWKLNQTEPVAGNYYPVNTRIYITD	Liver	2014	33
Reviewed	O00754	MAN2B1	Lysosomal alpha-mannosidase	766	RPTWKInQTEPVA	DSNGREILERRRDYRPTWKLNQTEPVAGNYYPVNTRIYITD	Breast Cancer cell lines	2013	37
Reviewed	O00754	MAN2B1	Lysosomal alpha-mannosidase	766	LnQTEPVAGNYYPV	DSNGREILERRRDYRPTWKLNQTEPVAGNYYPVNTRIYITD	Liver	2014	33
Reviewed	O00754	MAN2B1	Lysosomal alpha-mannosidase	766	InQTEPVAGNYYPVNTR	DSNGREILERRRDYRPTWKLNQTEPVAGNYYPVNTRIYITD	DLBCL cell lines (Diffuse large B-cell lymphoma);Liver tumor (HCC);Liver	2014;2014;2014	16;32;32
Reviewed	O00754	MAN2B1	Lysosomal alpha-mannosidase	766	LnQTEPVAGNYYPVNTR	DSNGREILERRRDYRPTWKLNQTEPVAGNYYPVNTRIYITD	Urine;IGROV-1/CP cell line (Ovarian cancer)IGROV-1/CP;TPC-1 Cell Line (Thyroid Cance);XTC-1 Cell Line (Thyroid Cance);ARO Cell Line (Thyroid Cance);Liver;ovarian tumor;Saliva;HEK293T cell line (embryonic kidney);Pancreatic islets;22Rv1 cell xenograft (prostate cancer);Breast cell lines;OVCAR-3 cell line (Ovarian cancer);SKOV-3 cell line (Ovarian cancer);Ovarian tumor;HuH-7 cell line (Liver); HCC …	2007;2007;2009;2009;2009;2009;2011;2011;2011;2012;2012;2012;2013;2013;2013;2013;2013;2014;2014;2014;2014;2014;2014;2014;2014;2015;2015;2015;2015;2015;2015;2015;2015;2015;2015;2007;2007;2007;2007;2007;2007;2007	75;62;62;62;64;54;56;57;48;50;52;34;34;34;38;40;13;14;15;17;18;22;25;33;1;2;12;Unpublished;Unpublished;Unpublished;Unpublished;Unpublished;Unpublished;Unpublished
Reviewed	O00754	MAN2B1	Lysosomal alpha-mannosidase	766	KLnQTEPVAGNYYPVNTR	DSNGREILERRRDYRPTWKLNQTEPVAGNYYPVNTRIYITD	Liver	2014	33
Reviewed	O00754	MAN2B1	Lysosomal alpha-mannosidase	766	KLnQTEPVAGNYYPVNTRIY	DSNGREILERRRDYRPTWKLNQTEPVAGNYYPVNTRIYITD	Liver	2014	33
Reviewed	O00754	MAN2B1	Lysosomal alpha-mannosidase	766	DYRPTWKLnQTEPVAGNYYPVNTR	DSNGREILERRRDYRPTWKLNQTEPVAGNYYPVNTRIYITD	XTC-1 Cell Line (Thyroid Cance);Breast cell lines;Liver;LNCap/PC3 cell lines (Prostate cancer)	2009;2012;2014;2015	62;52;33;2
Reviewed	O00754	MAN2B1	Lysosomal alpha-mannosidase	832	nGSGAWVR	MVHRRLLKDDGRGVSEPLMENGSGAWVRGRHLVLLDTAQAA	Liver;OVCAR-3 cell line (Ovarian cancer)	2014;2015	33;1
Reviewed	O00754	MAN2B1	Lysosomal alpha-mannosidase	832	GVSEPIMEnGSGAWVR	MVHRRLLKDDGRGVSEPLMENGSGAWVRGRHLVLLDTAQAA	DLBCL cell lines (Diffuse large B-cell lymphoma)	2014	16
Reviewed	O00754	MAN2B1	Lysosomal alpha-mannosidase	832	GVSEPLMEnGSGAWVR	MVHRRLLKDDGRGVSEPLMENGSGAWVRGRHLVLLDTAQAA	IGROV-1/CP cell line (Ovarian cancer)IGROV-1/CP;HEK293T cell line (embryonic kidney)Jurkat T cell line;Liver;LNCap/PC3 cell lines (Prostate cancer);Breast cancer xenografts;Prostate tumor	2007;2011;2014;2014;2015;2015;2007	75;57;13;33;2;Unpublished
Reviewed	O00754	MAN2B1	Lysosomal alpha-mannosidase	832	KDDGRGVSEPLMEnGSGAW	MVHRRLLKDDGRGVSEPLMENGSGAWVRGRHLVLLDTAQAA	Liver	2014	33
Reviewed	O00754	MAN2B1	Lysosomal alpha-mannosidase	930	nLSAPVTLNLR	PEMVLLRLEHQFAVGEDSGRNLSAPVTLNLRDLFSTFTITR	Prostate;Colorectal tumor;Liver;Ovarian tumor;OVCAR-3 cell line (Ovarian cancer);OVCAR-3 cell line (Ovarian cancer);LNCap/PC3 cell lines (Prostate cancer);Breast cancer xenografts;Prostate tumor;Urine;Urine;Urine;Hela cell line (cervical cancer);Prostate tumor	2014;2014;2014;2015;2015;2015;2015;2015;2015;2015;2015;2015;2015;2007	14;22;33;1;1;2;12;Unpublished
Reviewed	O00754	MAN2B1	Lysosomal alpha-mannosidase	930	AVGEDSGRnLSAPVTL	PEMVLLRLEHQFAVGEDSGRNLSAPVTLNLRDLFSTFTITR	Liver	2014	33
Reviewed	O00754	MAN2B1	Lysosomal alpha-mannosidase	930	AVGEDSGRnLSAPVTLNLRDLF	PEMVLLRLEHQFAVGEDSGRNLSAPVTLNLRDLFSTFTITR	Liver	2014	33
Reviewed	O00754	MAN2B1	Lysosomal alpha-mannosidase	930	RLEHQFAVGEDSGRnLSAPVTL	PEMVLLRLEHQFAVGEDSGRNLSAPVTLNLRDLFSTFTITR	Liver	2014	33
Reviewed	O00754	MAN2B1	Lysosomal alpha-mannosidase	930	IEHQFAVGEDSGRnISAPVTINIR	PEMVLLRLEHQFAVGEDSGRNLSAPVTLNLRDLFSTFTITR	DLBCL cell lines (Diffuse large B-cell lymphoma)	2014	16
Reviewed	O00754	MAN2B1	Lysosomal alpha-mannosidase	930	LEHQFAVGEDSGRnLSAPVTLNLR	PEMVLLRLEHQFAVGEDSGRNLSAPVTLNLRDLFSTFTITR	LnCap cell line (Prostate cancer);IGROV-1/CP cell line (Ovarian cancer)IGROV-1/CP;Breast cell lines;SKOV-3 cell line (Ovarian cancer);Prostate;OVCAR-3 cell line (Ovarian cancer);Platelet;LNCap/PC3 cell lines (Prostate cancer);Prostate tumor;Urine;Urine	2003;2007;2012;2013;2014;2015;2015;2015;2015;2015;2015;	83;75;52;34;14;1;Unpublished;2;Unpublished;Unpublished;Unpublished;Unpublished
Reviewed	O00754	MAN2B1	Lysosomal alpha-mannosidase	989	nITLEPMEIR	KWTTNTGPTPHQTPYQLDPANITLEPMEIRTFLASVQWKEV	OVCAR-3 cell line (Ovarian cancer)	2015	1
Reviewed	O00754	MAN2B1	Lysosomal alpha-mannosidase	989	DPAnITLEPMEIR	KWTTNTGPTPHQTPYQLDPANITLEPMEIRTFLASVQWKEV	ovarian tumor;Pancreatic islets;Prostate;Liver;Prostate tumor;Ovarian tumor	2011;2012;2014;2014;2007;2007	54;48;14;33;Unpublished;Unpublished
Reviewed	O00754	MAN2B1	Lysosomal alpha-mannosidase	989	DPAnITLEPMEIRTF	KWTTNTGPTPHQTPYQLDPANITLEPMEIRTFLASVQWKEV	Liver	2014	33
Reviewed	O00755	WNT7A	Protein Wnt-7a	83	WnCSALGER	GEGSQMGLDECQFQFRNGRWNCSALGERTVFGKELKVGSRE	Ovarian tumor	2015	Unpublished
Reviewed	O00755	WNT7A	Protein Wnt-7a	127	AGVAHAITAACTQGnLSDCGCDK	TYAIIAAGVAHAITAACTQGNLSDCGCDKEKQGQYHRDEGW	Prostate tumor	2007	Unpublished
Reviewed	O00763	ACACB	Acetyl-CoA carboxylase 2	118	NPLSSSDAAPSPELQAnGTGTQGLEATDTNGLSSSAR	KPPRNPLSSSDAAPSPELQANGTGTQGLEATDTNGLSSSAR	Liver	2014	33
Reviewed	O00763	ACACB	Acetyl-CoA carboxylase 2	118	NPLSSSDAAPSPELQAnGTGTQGLEATDTNGLSSSARPQGQQAGSPSK	KPPRNPLSSSDAAPSPELQANGTGTQGLEATDTNGLSSSAR	Liver	2014	33
Reviewed	O00763	ACACB	Acetyl-CoA carboxylase 2	2402	EnITYLK	VQWLEQHWQAGDGPRSTIRENITYLKHDSVLKTIRGLVEEN	Prostate tumor;Breast tumor	2007;2007	Unpublished;Unpublished
Reviewed	O00764	PDXK	Pyridoxal kinase	45	nHTGYAHWK	TFPLQVLGFEIDAVNSVQFSNHTGYAHWKGQVLNSDELQEL	OVCAR-3 cell line (Ovarian cancer)	2015	1
Reviewed	O00767	SCD	Acyl-CoA desaturase	259	YAVVLnATWLVN	GETFQNSVFVATFLRYAVVLNATWLVNSAAHLFGYRPYDKN	Urine	2007	Unpublished
Reviewed	O14494	PPAP2A	Lipid phosphate phosphohydrolase 1	142	InCSDGYIEYYICR	SIGRLRPHFLDVCDPDWSKINCSDGYIEYYICRGNAERVKE	Pancreatic islets;Breast cell lines;Spermatozoa;Prostate;Liver;Breast cancer xenografts;Prostate tumor;Urine;Urine	2012;2012;2013;2014;2014;2015;2015;2015;2015;	48;52;43;14;33;Unpublished;Unpublished;Unpublished;Unpublished;Unpublished
Reviewed	O14495	PPAP2B	Lipid phosphate phosphohydrolase 3	170	nCSEGYIQNYR	SIGRLRPHFLSVCNPDFSQINCSEGYIQNYRCRGDDSKVQE	OVCAR-3 cell line (Ovarian cancer)	2015	1
Reviewed	O14495	PPAP2B	Lipid phosphate phosphohydrolase 3	170	LRPHFLSVCNPDFSQInCSE	SIGRLRPHFLSVCNPDFSQINCSEGYIQNYRCRGDDSKVQE	Liver	2014	33
Reviewed	O14495	PPAP2B	Lipid phosphate phosphohydrolase 3	170	FLSVCNPDFSQInCSEGYIQNYR	SIGRLRPHFLSVCNPDFSQINCSEGYIQNYRCRGDDSKVQE	Ovarian tumor	2015	Unpublished
Reviewed	O14495	PPAP2B	Lipid phosphate phosphohydrolase 3	170	IRPHFISVCNPDFSQInCSEGYIQNYR	SIGRLRPHFLSVCNPDFSQINCSEGYIQNYRCRGDDSKVQE	DLBCL cell lines (Diffuse large B-cell lymphoma)	2014	16
Reviewed	O14495	PPAP2B	Lipid phosphate phosphohydrolase 3	170	LRPHFLSVCNPDFSQInCSEGYIQNYR	SIGRLRPHFLSVCNPDFSQINCSEGYIQNYRCRGDDSKVQE	Liver;Ovarian tumor;Hela cell line (cervical cancer)	2014;2015;2015	33;Unpublished;12
Reviewed	O14497	ARID1A	AT-rich interactive domain-containing protein 1A	742	nQSSIAQDR	NQMPPRPPSGQSDSIMHPSMNQSSIAQDRGYMQRNPQMPQY	OVCAR-3 cell line (Ovarian cancer)	2015	1
Reviewed	O14497	ARID1A	AT-rich interactive domain-containing protein 1A	742	PPSGQSDSIMHPSMnQSSIAQDR	NQMPPRPPSGQSDSIMHPSMNQSSIAQDRGYMQRNPQMPQY	Urine	2007	Unpublished
Reviewed	O14498	ISLR	Immunoglobulin superfamily containing leucine-rich repeat protein	51	DLESVPPGFPAnVTTLSLSANR	FQIADCAYRDLESVPPGFPANVTTLSLSANRLPGLPEGAFR	Urine;Ovarian tumor;Platelet;Breast cancer xenografts;Urine;Serum;Urine;Urine;Prostate tumor;Cerebrospinal fluid	2007;2015;2015;2015;2015;2015;2015;2007;2007;2007	Unpublished;Unpublished;Unpublished
Reviewed	O14498	ISLR	Immunoglobulin superfamily containing leucine-rich repeat protein	51	DLESVPPGFPAnVTTLSLSANRLPGLPEGAFR	FQIADCAYRDLESVPPGFPANVTTLSLSANRLPGLPEGAFR	Platelet	2015	Unpublished
Reviewed	O14498	ISLR	Immunoglobulin superfamily containing leucine-rich repeat protein	120	SLDLSHNLISDFAWSDLHnLSALQLLK	LKSLDLSHNLISDFAWSDLHNLSALQLLKMDSNELTFIPRD	Liver;Ovarian tumor;Serum;Serum;Serum;Prostate tumor;Breast tumor;Cerebrospinal fluid	2014;2015;2015;2015;2007;2007;2007;2007	33;10;Unpublished;Unpublished;Unpublished;Unpublished
Reviewed	O14498	ISLR	Immunoglobulin superfamily containing leucine-rich repeat protein	309	AnGSLLIPDFGK	GRALPGTPVASSQPRFQAFANGSLLIPDFGKLEEGTYSCLA	Ovarian tumor	2015	Unpublished
Reviewed	O14498	ISLR	Immunoglobulin superfamily containing leucine-rich repeat protein	309	FQAFAnGSLLIPD	GRALPGTPVASSQPRFQAFANGSLLIPDFGKLEEGTYSCLA	Liver	2014	33
Reviewed	O14498	ISLR	Immunoglobulin superfamily containing leucine-rich repeat protein	309	FQAFAnGSLLIPDFGK	GRALPGTPVASSQPRFQAFANGSLLIPDFGKLEEGTYSCLA	Urine;Urine;Liver;Ovarian tumor;Platelet;Breast cancer xenografts;Urine;Urine;Urine;Serum;Urine;Serum;Prostate tumor;Ovarian tumor;Cerebrospinal fluid	2007;2013;2014;2015;2015;2015;2015;2015;2015;2015;2007;2007;2007;2007;2007	45;33;10;Unpublished;Unpublished;Unpublished;Unpublished;Unpublished
Reviewed	O14511	NRG2	Pro-neuregulin-2, membrane-bound isoform	147	VQGLVPAGGSSSnSTR	APVVVEGKVQGLVPAGGSSSNSTREPPASGRVALVKVLDKW	Prostate;Serum;Prostate tumor;Cerebrospinal fluid	2014;2007;2007;2007	14;Unpublished;Unpublished;Unpublished
Reviewed	O14514	BAI1	Brain-specific angiogenesis inhibitor 1	1304	YPGGPLPDFPnHSLTLK	SKLHLHGSPRYPGGPLPDFPNHSLTLKRDKAPKSSFVGDGD	Prostate	2014	14
Reviewed	O14523	C2CD2L	C2 domain-containing protein 2-like	668	RPRQKEAGLSQSHDDLSnATATPSVRK	FRRRPRQKEAGLSQSHDDLSNATATPSVRKKAGSFSRRLIK	Serum;Prostate tumor	2007;2007	Unpublished;Unpublished
Reviewed	O14524	NEMP1	Nuclear envelope integral membrane protein 1	125	InDTYVNVGIYSTK	KELEQFSIWNFFSSFLKEKLNDTYVNVGLYSTKTCLKVEII	DLBCL cell lines (Diffuse large B-cell lymphoma)	2014	16
Reviewed	O14524	NEMP1	Nuclear envelope integral membrane protein 1	125	LnDTYVNVGLYSTK	KELEQFSIWNFFSSFLKEKLNDTYVNVGLYSTKTCLKVEII	Jurkat T cell line;Ovarian tumor;OVCAR-3 cell line (Ovarian cancer);Breast cancer xenografts;HEK293T cell line (embryonic kidney), HEK293T cell line (embryonic kidney)	2014;2015;2015;2015;2015	13;Unpublished;1;Unpublished;9
Reviewed	O14524	NEMP1	Nuclear envelope integral membrane protein 1	125	EKLnDTYVNVGLYSTK	KELEQFSIWNFFSSFLKEKLNDTYVNVGLYSTKTCLKVEII	Ovarian tumor;OVCAR-3 cell line (Ovarian cancer);Breast cancer xenografts	2015;2015;2015	Unpublished;1;Unpublished
Reviewed	O14525	ASTN1	Astrotactin-1	984	LVTNnQTQR	AEPVLLEVTKAAPIYELVTNNQTQRLLQEATMSSLWCSGTG	Pancreatic islets	2012	48
Reviewed	O14545	TRAFD1	TRAF-type zinc finger domain-containing protein 1	457	SCLPPSRPINnMTATYNQLSR	TKQETANGPTSCLPPSRPINNMTATYNQLSRSTSGPRPGCQ	Urine	2007	Unpublished
Reviewed	O14556	GAPDHS	Glyceraldehyde-3-phosphate dehydrogenase, testis-specific	221	nASCTTNCLAPLAK	MFVMGVNENDYNPGSMNIVSNASCTTNCLAPLAKVIHERFG	OVCAR-3 cell line (Ovarian cancer)	2015	1
Reviewed	O14556	GAPDHS	Glyceraldehyde-3-phosphate dehydrogenase, testis-specific	221	IVSnASCTTNCLAPLAK	MFVMGVNENDYNPGSMNIVSNASCTTNCLAPLAKVIHERFG	Urine;Prostate;Urine;Serum;Prostate tumor	2007;2014;2007;2007;2007	14;Unpublished;Unpublished;Unpublished
Reviewed	O14576	DYNC1I1	Cytoplasmic dynein 1 intermediate chain 1	272	DGDVQAGAnLSFNR	FFDYSGRELEEKDGDVQAGANLSFNRQFYDEHWSKHRVVTC	Urine;Urine;Prostate tumor	2007;2007;2007	Unpublished;Unpublished
Reviewed	O14579	COPE	Coatomer subunit epsilon	116	SVDVTnTTFLLMAASIYLHDQNPDAALR	RRDSIVAELDREMSRSVDVTNTTFLLMAASIYLHDQNPDAA	Serum	2015	Unpublished
Reviewed	O14594	NCAN	Neurocan core protein	122	AnATLLLGPLR	RVAKSWQGRVSLPSYPRRRANATLLLGPLRASDSGLYRCQV	Breast cancer xenografts;Prostate tumor;Cerebrospinal fluid	2015;2007;2007	Unpublished;Unpublished
Reviewed	O14594	NCAN	Neurocan core protein	122	RAnATLLLGPLR	RVAKSWQGRVSLPSYPRRRANATLLLGPLRASDSGLYRCQV	Breast cancer xenografts	2015	Unpublished
Reviewed	O14594	NCAN	Neurocan core protein	1223	GTVLCGPPPAVEnASLIGAR	NLPYVCKKGTVLCGPPPAVENASLIGARKAKYNVHATVRYQ	Breast cancer xenografts	2015	Unpublished
Reviewed	O14626	GPR171	Probable G-protein coupled receptor 171	3	TnSSFFCPVYK	------------------MTNSSFFCPVYKDLEPFTYFFYL	DLBCL cell lines (Diffuse large B-cell lymphoma)	2014	16
Reviewed	O14638	ENPP3	Ectonucleotide pyrophosphatase/phosphodiesterase family member 3	279	AATYFWPGSEVAInGSFPSIYMPYNGSVPFEERISTLLK	AMYQGLKAATYFWPGSEVAINGSFPSIYMPYNGSVPFEERI	HepG2 cell line (Liver)	2013	38
Reviewed	O14638	ENPP3	Ectonucleotide pyrophosphatase/phosphodiesterase family member 3	290	AATYFWPGSEVAINGSFPSIYMPYnGSVPFEERISTLLK	FWPGSEVAINGSFPSIYMPYNGSVPFEERISTLLKWLDLPK	HepG2 cell line (Liver)	2013	38
Reviewed	O14638	ENPP3	Ectonucleotide pyrophosphatase/phosphodiesterase family member 3	426	SFNSEEIVRnL	IRAHNIPHDFFSFNSEEIVRNLSCRKPDQHFKPYLTPDLPK	Liver	2014	33
Reviewed	O14638	ENPP3	Ectonucleotide pyrophosphatase/phosphodiesterase family member 3	533	IQPAPNnGTHGSINHIIK	ENIEVYNLMCDLLRIQPAPNNGTHGSLNHLLKVPFYEPSHA	Spermatozoa;DLBCL cell lines (Diffuse large B-cell lymphoma)	2013;2014	43;16
Reviewed	O14638	ENPP3	Ectonucleotide pyrophosphatase/phosphodiesterase family member 3	533	IQPAPNnGTHGSLNHLLK	ENIEVYNLMCDLLRIQPAPNNGTHGSLNHLLKVPFYEPSHA	Liver;Urine;Urine	2014;2015;2015;	33;Unpublished;Unpublished;Unpublished
Reviewed	O14638	ENPP3	Ectonucleotide pyrophosphatase/phosphodiesterase family member 3	687	LADKnITHGF	ADVRVPPSESQKCSFYLADKNITHGFLYPPASNRTSDSQYD	Liver	2014	33
Reviewed	O14638	ENPP3	Ectonucleotide pyrophosphatase/phosphodiesterase family member 3	687	YLADKnITHGF	ADVRVPPSESQKCSFYLADKNITHGFLYPPASNRTSDSQYD	Liver	2014	33
Reviewed	O14638	ENPP3	Ectonucleotide pyrophosphatase/phosphodiesterase family member 3	687	CSFYIADKnITHGFIYPPASNR	ADVRVPPSESQKCSFYLADKNITHGFLYPPASNRTSDSQYD	DLBCL cell lines (Diffuse large B-cell lymphoma)	2014	16
Reviewed	O14638	ENPP3	Ectonucleotide pyrophosphatase/phosphodiesterase family member 3	699	CSFYIADKNITHGFIYPPASnR	CSFYLADKNITHGFLYPPASNRTSDSQYDALITSNLVPMYE	DLBCL cell lines (Diffuse large B-cell lymphoma)	2014	16
Reviewed	O14647	CHD2	Chromodomain-helicase-DNA-binding protein 2	1083	KAQTnDSDSDTESK	ELEEIYMLPRIRSSTKKAQTNDSDSDTESKRQAQRSSASES	ovarian tumor;Prostate tumor;Ovarian tumor	2011;2007;2007	54;Unpublished;Unpublished
Reviewed	O14649	KCNK3	Potassium channel subfamily K member 3	53	YnLSQGGYEELER	PELIERQRLELRQQELRARYNLSQGGYEELERVVLRLKPHK	Pancreatic islets	2012	48
Reviewed	O14656	TOR1A	Torsin-1A	143	HFPHASnITLY	GLNSDYVHLFVATLHFPHASNITLYKDQLQLWIRGNVSACA	Liver	2014	33
Reviewed	O14656	TOR1A	Torsin-1A	143	HFPHASnITLYK	GLNSDYVHLFVATLHFPHASNITLYKDQLQLWIRGNVSACA	Urine	2007	Unpublished
Reviewed	O14656	TOR1A	Torsin-1A	143	IIAENIYEGGLNSDYVHLFVATLHFPHASnITLYK	GLNSDYVHLFVATLHFPHASNITLYKDQLQLWIRGNVSACA	LNCap/PC3 cell lines (Prostate cancer)	2015	2
Reviewed	O14656	TOR1A	Torsin-1A	158	GnVSACAR	FPHASNITLYKDQLQLWIRGNVSACARSIFIFDEMDKMHAG	HCC cell lines (Liver);DLBCL cell lines (Diffuse large B-cell lymphoma);Ovarian tumor	2013;2014;2015	40;16;Unpublished
Reviewed	O14656	TOR1A	Torsin-1A	158	IRGnVSAC	FPHASNITLYKDQLQLWIRGNVSACARSIFIFDEMDKMHAG	Liver	2014	33
Reviewed	O14657	TOR1B	Torsin-1B	64	PInASAIK	LSYNDIYCRFAECCREERPLNASALKLDLEEKLFGQHLATE	DLBCL cell lines (Diffuse large B-cell lymphoma)	2014	16
Reviewed	O14657	TOR1B	Torsin-1B	64	PLnASALK	LSYNDIYCRFAECCREERPLNASALKLDLEEKLFGQHLATE	Liver;Ovarian tumor	2014;2015	33;Unpublished
Reviewed	O14657	TOR1B	Torsin-1B	64	ERPLnASALK	LSYNDIYCRFAECCREERPLNASALKLDLEEKLFGQHLATE	Liver	2014	33
Reviewed	O14657	TOR1B	Torsin-1B	64	EERPInASAIK	LSYNDIYCRFAECCREERPLNASALKLDLEEKLFGQHLATE	Liver tumor (HCC);Liver	2014;2014	32;32
Reviewed	O14657	TOR1B	Torsin-1B	64	EERPLnASALK	LSYNDIYCRFAECCREERPLNASALKLDLEEKLFGQHLATE	HCCLM3 cell line (Liver);Pancreatic islets;OVCAR-3 cell line (Ovarian cancer);SKOV-3 cell line (Ovarian cancer); HCC cell lines (Liver); Jurkat T cell line;Colorectal tumor;Liver;Ovarian tumor;OVCAR-3 cell line (Ovarian cancer);LNCap/PC3 cell lines (Prostate cancer);Breast cancer xenografts;Urine;Urine;Hela cell line (cervical cancer)	2009;2012;2013;2013;2013;2014;2014;2014;2015;2015;2015;2015;2015;2015;2015;	63;48;34;34;40;13;22;33;Unpublished;1;2;Unpublished;Unpublished;Unpublished;12;Unpublished
Reviewed	O14657	TOR1B	Torsin-1B	64	REERPInASAIKI	LSYNDIYCRFAECCREERPLNASALKLDLEEKLFGQHLATE	Breast Cancer cell lines	2013	37
Reviewed	O14657	TOR1B	Torsin-1B	64	EERPLnASALKLDLEEK	LSYNDIYCRFAECCREERPLNASALKLDLEEKLFGQHLATE	Hela cell line (cervical cancer)	2015	12
Reviewed	O14657	TOR1B	Torsin-1B	165	IRGnVSAC	FPHEQKIKLYQDQLQKWIRGNVSACANSVFIFDEMDKLHPG	Liver	2014	33
Reviewed	O14672	ADAM10	Disintegrin and metalloproteinase domain-containing protein 10	267	nISFMVK	SSHVKAIDTIYQTTDFSGIRNISFMVKRIRINTTADEKDPT	Liver;Ovarian tumor;LNCap/PC3 cell lines (Prostate cancer);Breast cancer xenografts	2014;2015;2015;2015	33;Unpublished;2;Unpublished
Reviewed	O14672	ADAM10	Disintegrin and metalloproteinase domain-containing protein 10	267	SGIRnISF	SSHVKAIDTIYQTTDFSGIRNISFMVKRIRINTTADEKDPT	Liver	2014	33
Reviewed	O14672	ADAM10	Disintegrin and metalloproteinase domain-containing protein 10	267	AIDTIYQTTDFSGIRnISFMVK	SSHVKAIDTIYQTTDFSGIRNISFMVKRIRINTTADEKDPT	Breast cell lines;OVCAR-3 cell line (Ovarian cancer);Platelet;LNCap/PC3 cell lines (Prostate cancer)	2012;2015;2015;2015	52;1;Unpublished;2
Reviewed	O14672	ADAM10	Disintegrin and metalloproteinase domain-containing protein 10	278	InTTADEK	QTTDFSGIRNISFMVKRIRINTTADEKDPTNPFRFPNIGVE	HCC cell lines (Liver);Prostate;Colorectal tumor;Ovarian tumor;Breast cancer xenografts;Prostate tumor;Prostate tumor;Breast tumor;Breast cancer cell lines;Ovarian tumor;Lymphocytes	2013;2014;2014;2015;2015;2015;2007;2007;2007;2007;2007	40;14;22;Unpublished;Unpublished;Unpublished;Unpublished;Unpublished
Reviewed	O14672	ADAM10	Disintegrin and metalloproteinase domain-containing protein 10	278	InTTADEKD	QTTDFSGIRNISFMVKRIRINTTADEKDPTNPFRFPNIGVE	Ovarian tumor	2015	Unpublished
Reviewed	O14672	ADAM10	Disintegrin and metalloproteinase domain-containing protein 10	278	IRInTTADEKD	QTTDFSGIRNISFMVKRIRINTTADEKDPTNPFRFPNIGVE	Prostate;Prostate tumor	2014;2015	14;Unpublished
Reviewed	O14672	ADAM10	Disintegrin and metalloproteinase domain-containing protein 10	278	VKRIRInTTADEK	QTTDFSGIRNISFMVKRIRINTTADEKDPTNPFRFPNIGVE	Breast Cancer cell lines	2013	37
Reviewed	O14672	ADAM10	Disintegrin and metalloproteinase domain-containing protein 10	278	InTTADEKDPTNPF	QTTDFSGIRNISFMVKRIRINTTADEKDPTNPFRFPNIGVE	Pancreatic islets;Liver	2012;2014	48;33
Reviewed	O14672	ADAM10	Disintegrin and metalloproteinase domain-containing protein 10	278	nTTADEKDPTNPFR	QTTDFSGIRNISFMVKRIRINTTADEKDPTNPFRFPNIGVE	Pancreatic islets;Prostate;OVCAR-3 cell line (Ovarian cancer)	2012;2014;2015	48;14;1
Reviewed	O14672	ADAM10	Disintegrin and metalloproteinase domain-containing protein 10	278	InTTADEKDPTNPFR	QTTDFSGIRNISFMVKRIRINTTADEKDPTNPFRFPNIGVE	Urine;IGROV-1/CP cell line (Ovarian cancer)IGROV-1/CP;TPC-1 Cell Line (Thyroid Cance);XTC-1 Cell Line (Thyroid Cance);ARO Cell Line (Thyroid Cance);Liver;Bladder stromal cell line;Prostate stromal cell line;Colorectal cancer cell line, HCT-116 (colorectal cancer);Pancreatic islets;Breast cell lines;OVCAR-3 cell line (Ovarian cancer);SKOV-3 cell line (Ovarian cancer);Ovarian tumor; Jurkat T cell l…	2007;2007;2009;2009;2009;2009;2009;2009;2011;2012;2012;2013;2013;2013;2014;2014;2014;2014;2014;2014;2014;2015;2015;2015;2015;2015;2015;2015;2015;2015;	Unpublished;75;62;62;62;64;65;65;58;48;52;34;34;34;13;14;15;18;22;25;33;Unpublished;1;Unpublished;2;Unpublished;Unpublished;Unpublished;Unpublished;12;Unpublished
Reviewed	O14672	ADAM10	Disintegrin and metalloproteinase domain-containing protein 10	278	IRInTTADEKDPTNP	QTTDFSGIRNISFMVKRIRINTTADEKDPTNPFRFPNIGVE	Liver	2009	64
Reviewed	O14672	ADAM10	Disintegrin and metalloproteinase domain-containing protein 10	278	IRInTTADEKDPTNPF	QTTDFSGIRNISFMVKRIRINTTADEKDPTNPFRFPNIGVE	Liver	2014	33
Reviewed	O14672	ADAM10	Disintegrin and metalloproteinase domain-containing protein 10	278	IRInTTADEKDPTNPFR	QTTDFSGIRNISFMVKRIRINTTADEKDPTNPFRFPNIGVE	Colorectal cancer cell line, HCT-116 (colorectal cancer);Breast cell lines;OVCAR-3 cell line (Ovarian cancer);SKOV-3 cell line (Ovarian cancer); Jurkat T cell line;Prostate;DLBCL cell lines (Diffuse large B-cell lymphoma);Non-small Cell Lung Carcinoma;OVCAR-3 cell line (Ovarian cancer);Platelet;LNCap/PC3 cell lines (Prostate cancer);Prostate tumor;Urine;Urine	2011;2012;2013;2013;2014;2014;2014;2014;2015;2015;2015;2015;2015;2015;	58;52;34;34;13;14;16;18;1;Unpublished;2;Unpublished;Unpublished;Unpublished;Unpublished
Reviewed	O14672	ADAM10	Disintegrin and metalloproteinase domain-containing protein 10	278	InTTADEKDPTNPFRFPNIGVEK	QTTDFSGIRNISFMVKRIRINTTADEKDPTNPFRFPNIGVE	Colorectal cancer cell line, HCT-116 (colorectal cancer);Breast cell lines;OVCAR-3 cell line (Ovarian cancer);SKOV-3 cell line (Ovarian cancer);Ovarian tumor; Jurkat T cell line;HEK293 cell line (embryonic kidney);Non-small Cell Lung Carcinoma;Liver;OVCAR-3 cell line (Ovarian cancer);Platelet;LNCap/PC3 cell lines (Prostate cancer)	2011;2012;2013;2013;2013;2014;2014;2014;2014;2015;2015;2015	58;52;34;34;34;13;15;18;33;1;Unpublished;2
Reviewed	O14672	ADAM10	Disintegrin and metalloproteinase domain-containing protein 10	439	nISQVLEK	ARATSGDKLNNNKFSLCSIRNISQVLEKKRNNCFVESGQPI	Platelet Plasma membranes;Colorectal cancer cell line, HCT-116 (colorectal cancer); HCC cell lines (Liver);Prostate;HEK293 cell line (embryonic kidney);Hela cell line (cervical cancer);Liver;Ovarian tumor;OVCAR-3 cell line (Ovarian cancer);Platelet;LNCap/PC3 cell lines (Prostate cancer);Breast cancer xenografts;Prostate tumor;Urine;Urine;Hela cell line (cervical cancer);Prostate tumor;Breast tumo…	2007;2011;2013;2014;2014;2014;2014;2015;2015;2015;2015;2015;2015;2015;2015;2015;2007;2007;2007;2007	74;58;40;14;15;17;33;1;2;12;Unpublished;Unpublished;Unpublished;Unpublished
Reviewed	O14672	ADAM10	Disintegrin and metalloproteinase domain-containing protein 10	439	nISQVLEKK	ARATSGDKLNNNKFSLCSIRNISQVLEKKRNNCFVESGQPI	Liver;Platelet;LNCap/PC3 cell lines (Prostate cancer)	2014;2015;2015	33;Unpublished;2
Reviewed	O14672	ADAM10	Disintegrin and metalloproteinase domain-containing protein 10	439	SIRnISQVL	ARATSGDKLNNNKFSLCSIRNISQVLEKKRNNCFVESGQPI	Liver	2014	33
Reviewed	O14672	ADAM10	Disintegrin and metalloproteinase domain-containing protein 10	439	SICSIRnISQVIE	ARATSGDKLNNNKFSLCSIRNISQVLEKKRNNCFVESGQPI	Breast Cancer cell lines	2013	37
Reviewed	O14672	ADAM10	Disintegrin and metalloproteinase domain-containing protein 10	439	FSLCSIRnISQVLEK	ARATSGDKLNNNKFSLCSIRNISQVLEKKRNNCFVESGQPI	Colorectal cancer cell line, HCT-116 (colorectal cancer)	2011	58
Reviewed	O14672	ADAM10	Disintegrin and metalloproteinase domain-containing protein 10	551	nFTDCNR	AREGICNGFTALCPASDPKPNFTDCNRHTQVCINGQCAGSI	OVCAR-3 cell line (Ovarian cancer)	2015	1
Reviewed	O14672	ADAM10	Disintegrin and metalloproteinase domain-containing protein 10	551	PKPnFTDCNR	AREGICNGFTALCPASDPKPNFTDCNRHTQVCINGQCAGSI	Pancreatic islets;Liver	2012;2014	48;33
Reviewed	O14672	ADAM10	Disintegrin and metalloproteinase domain-containing protein 10	551	DPKPnFTDCNR	AREGICNGFTALCPASDPKPNFTDCNRHTQVCINGQCAGSI	Pancreatic islets	2012	48
Reviewed	O14672	ADAM10	Disintegrin and metalloproteinase domain-containing protein 10	551	ASDPKPnFTDCNR	AREGICNGFTALCPASDPKPNFTDCNRHTQVCINGQCAGSI	Breast Cancer cell lines	2013	37
Reviewed	O14672	ADAM10	Disintegrin and metalloproteinase domain-containing protein 10	551	TALCPASDPKPnFTDCNR	AREGICNGFTALCPASDPKPNFTDCNRHTQVCINGQCAGSI	Pancreatic islets;Liver	2012;2014	48;33
Reviewed	O14672	ADAM10	Disintegrin and metalloproteinase domain-containing protein 10	551	TALCPASDPKPnFTDCNRHTQ	AREGICNGFTALCPASDPKPNFTDCNRHTQVCINGQCAGSI	Liver	2014	33
Reviewed	O14672	ADAM10	Disintegrin and metalloproteinase domain-containing protein 10	551	EGICNGFTAICPASDPKPnFTDCNR	AREGICNGFTALCPASDPKPNFTDCNRHTQVCINGQCAGSI	DLBCL cell lines (Diffuse large B-cell lymphoma)	2014	16
Reviewed	O14672	ADAM10	Disintegrin and metalloproteinase domain-containing protein 10	551	EGICNGFTALCPASDPKPnFTDCNR	AREGICNGFTALCPASDPKPNFTDCNRHTQVCINGQCAGSI	TPC-1 Cell Line (Thyroid Cance);ARO Cell Line (Thyroid Cance);Pancreatic islets;Breast cell lines;OVCAR-3 cell line (Ovarian cancer);SKOV-3 cell line (Ovarian cancer);Ovarian tumorJurkat T cell line;Prostate;HEK293 cell line (embryonic kidney);Colorectal tumor;K562A cell line (Leukemia);Liver;Ovarian tumor;OVCAR-3 cell line (Ovarian cancer);Platelet;Breast cancer xenografts;Prostate tumor;HEK293T…	2009;2009;2012;2012;2013;2013;2013;2014;2014;2014;2014;2014;2014;2015;2015;2015;2015;2015;2015;2015;2007;2007;2007	62;62;48;52;34;34;34;13;14;15;22;25;33;1;9;12;Unpublished;Unpublished;Unpublished
Reviewed	O14686	KMT2D	Histone-lysine N-methyltransferase 2D	284	KPGnDSKMLVCETCDK	KRAGWQCPECKVCQACRKPGNDSKMLVCETCDKGYHTFCLK	Urine	2007	Unpublished
Reviewed	O14715	RGPD8	RANBP2-like and GRIP domain-containing protein 8	942	EKPLEnDTGLQAQDIR	FKFGISEPGNQEKKREKPLENDTGLQAQDIRGRKKGRGVIF	Prostate tumor;Breast tumor	2007;2007	Unpublished;Unpublished
Reviewed	O14717	TRDMT1	tRNA (cytosine(38)-C(5))-methyltransferase	213	NVEPnISFDGSIQCSGKDAILFKLETAEEIHR	HPQKYAMDVENKIQEKNVEPNISFDGSIQCSGKDAILFKLE	Serum;Prostate tumor	2007;2007	Unpublished;Unpublished
Reviewed	O14727	APAF1	Apoptotic protease-activating factor 1	420	VPTKVLCILWDMETEEVEDILQEFVnK	LCILWDMETEEVEDILQEFVNKSLLFCDRNGKSFRYYLHDL	Serum	2015	Unpublished
Reviewed	O14727	APAF1	Apoptotic protease-activating factor 1	602	nITNLSR	LQAKQEVDNGMLYLEWINKKNITNLSRLVVRPHTDAVYHAC	Prostate	2014	14
Reviewed	O14727	APAF1	Apoptotic protease-activating factor 1	602	KnITNLSR	LQAKQEVDNGMLYLEWINKKNITNLSRLVVRPHTDAVYHAC	Urine;Urine;Prostate tumor	2007;2007;2007	Unpublished;Unpublished
Reviewed	O14727	APAF1	Apoptotic protease-activating factor 1	605	NITnLSR	KQEVDNGMLYLEWINKKNITNLSRLVVRPHTDAVYHACFSE	Prostate	2014	14
Reviewed	O14727	APAF1	Apoptotic protease-activating factor 1	605	KNITnLSR	KQEVDNGMLYLEWINKKNITNLSRLVVRPHTDAVYHACFSE	Urine;Urine;Prostate tumor	2007;2007;2007	Unpublished;Unpublished
Reviewed	O14746	TERT	Telomerase reverse transcriptase	204	RLGCERAWnHSVREAGVPLGLPAPGAR	ARPPPHASGPRRRLGCERAWNHSVREAGVPLGLPAPGARRR	Urine	2007	Unpublished
Reviewed	O14771	ZNF213	Zinc finger protein 213	237	nTTLGFGLK	GTLDPAQRDLFWDIKRENSRNTTLGFGLKGQSEKSLLQEMV	Breast cancer xenografts	2015	Unpublished
Reviewed	O14773	TPP1	Tripeptidyl-peptidase 1	210	nLTSQDVGSGTSNNSQ	VTGTVGLHLGVTPSVIRKRYNLTSQDVGSGTSNNSQACAQF	Liver	2014	33
Reviewed	O14773	TPP1	Tripeptidyl-peptidase 1	210	YnITSQDVGSGTSNNS	VTGTVGLHLGVTPSVIRKRYNLTSQDVGSGTSNNSQACAQF	Liver	2014	32
Reviewed	O14773	TPP1	Tripeptidyl-peptidase 1	210	nLTSQDVGSGTSNNSQA	VTGTVGLHLGVTPSVIRKRYNLTSQDVGSGTSNNSQACAQF	Liver	2014	33
Reviewed	O14773	TPP1	Tripeptidyl-peptidase 1	210	YnLTSQDVGSGTSNNSQ	VTGTVGLHLGVTPSVIRKRYNLTSQDVGSGTSNNSQACAQF	Liver	2014	33
Reviewed	O14773	TPP1	Tripeptidyl-peptidase 1	210	nLTSQDVGSGTSNNSQAC	VTGTVGLHLGVTPSVIRKRYNLTSQDVGSGTSNNSQACAQF	Liver	2014	33
Reviewed	O14773	TPP1	Tripeptidyl-peptidase 1	210	RYnLTSQDVGSGTSNNSQ	VTGTVGLHLGVTPSVIRKRYNLTSQDVGSGTSNNSQACAQF	Liver	2014	33
Reviewed	O14773	TPP1	Tripeptidyl-peptidase 1	210	YnLTSQDVGSGTSNNSQA	VTGTVGLHLGVTPSVIRKRYNLTSQDVGSGTSNNSQACAQF	Pancreatic islets;Prostate;Liver;Prostate tumor	2012;2014;2014;2015	48;14;33;Unpublished
Reviewed	O14773	TPP1	Tripeptidyl-peptidase 1	210	RYnLTSQDVGSGTSNNSQA	VTGTVGLHLGVTPSVIRKRYNLTSQDVGSGTSNNSQACAQF	HEK293T cell line (embryonic kidney);Liver	2011;2014	57;33
Reviewed	O14773	TPP1	Tripeptidyl-peptidase 1	210	YnLTSQDVGSGTSNNSQAC	VTGTVGLHLGVTPSVIRKRYNLTSQDVGSGTSNNSQACAQF	Pancreatic islets	2012	48
Reviewed	O14773	TPP1	Tripeptidyl-peptidase 1	210	KRYnLTSQDVGSGTSNNSQA	VTGTVGLHLGVTPSVIRKRYNLTSQDVGSGTSNNSQACAQF	Urine;Sample information lost;Liver	2007;2007;2014	Unpublished;Unpublished;33
Reviewed	O14773	TPP1	Tripeptidyl-peptidase 1	210	nLTSQDVGSGTSNNSQACAQ	VTGTVGLHLGVTPSVIRKRYNLTSQDVGSGTSNNSQACAQF	Liver	2014	33
Reviewed	O14773	TPP1	Tripeptidyl-peptidase 1	210	YnLTSQDVGSGTSNNSQACA	VTGTVGLHLGVTPSVIRKRYNLTSQDVGSGTSNNSQACAQF	Prostate;Prostate tumor	2014;2015	14;Unpublished
Reviewed	O14773	TPP1	Tripeptidyl-peptidase 1	210	nLTSQDVGSGTSNNSQACAQF	VTGTVGLHLGVTPSVIRKRYNLTSQDVGSGTSNNSQACAQF	Liver	2014	33
Reviewed	O14773	TPP1	Tripeptidyl-peptidase 1	210	YnLTSQDVGSGTSNNSQACAQ	VTGTVGLHLGVTPSVIRKRYNLTSQDVGSGTSNNSQACAQF	Liver	2014	33
Reviewed	O14773	TPP1	Tripeptidyl-peptidase 1	210	YnLTSQDVGSGTSNNSQACAQF	VTGTVGLHLGVTPSVIRKRYNLTSQDVGSGTSNNSQACAQF	Liver	2014	33
Reviewed	O14773	TPP1	Tripeptidyl-peptidase 1	210	RYnLTSQDVGSGTSNNSQACAQF	VTGTVGLHLGVTPSVIRKRYNLTSQDVGSGTSNNSQACAQF	Liver	2014	33
Reviewed	O14773	TPP1	Tripeptidyl-peptidase 1	210	YnLTSQDVGSGTSNNSQACAQFLE	VTGTVGLHLGVTPSVIRKRYNLTSQDVGSGTSNNSQACAQF	Liver	2014	33
Reviewed	O14773	TPP1	Tripeptidyl-peptidase 1	210	RYnLTSQDVGSGTSNNSQACAQFLE	VTGTVGLHLGVTPSVIRKRYNLTSQDVGSGTSNNSQACAQF	Liver	2014	33
Reviewed	O14773	TPP1	Tripeptidyl-peptidase 1	210	KRYnLTSQDVGSGTSNNSQACAQFLE	VTGTVGLHLGVTPSVIRKRYNLTSQDVGSGTSNNSQACAQF	Liver	2014	33
Reviewed	O14773	TPP1	Tripeptidyl-peptidase 1	210	YnLTSQDVGSGTSNNSQACAQFLEQY	VTGTVGLHLGVTPSVIRKRYNLTSQDVGSGTSNNSQACAQF	Liver	2014	33
Reviewed	O14773	TPP1	Tripeptidyl-peptidase 1	210	YnLTSQDVGSGTSNNSQACAQFLEQYFHDSDLAQF	VTGTVGLHLGVTPSVIRKRYNLTSQDVGSGTSNNSQACAQF	Liver	2014	33
Reviewed	O14773	TPP1	Tripeptidyl-peptidase 1	210	YnITSQDVGSGTSNNSQACAQFIEQYFHDSDIAQFMR	VTGTVGLHLGVTPSVIRKRYNLTSQDVGSGTSNNSQACAQF	DLBCL cell lines (Diffuse large B-cell lymphoma);Liver tumor (HCC)	2014;2014	16;32
Reviewed	O14773	TPP1	Tripeptidyl-peptidase 1	210	YnLTSQDVGSGTSNNSQACAQFLEQYFHDSDLAQFMR	VTGTVGLHLGVTPSVIRKRYNLTSQDVGSGTSNNSQACAQF	TPC-1 Cell Line (Thyroid Cance);XTC-1 Cell Line (Thyroid Cance);DRO-1 Cell Line (Thyroid Cance);Liver;HeLa cell line (Cervical cancer);Colorectal cancer cell line, HCT-116 (colorectal cancer);Breast cell lines;Ovarian tumor;Liver;Ovarian tumor;OVCAR-3 cell line (Ovarian cancer);Platelet;LNCap/PC3 cell lines (Prostate cancer);Serum	2009;2009;2009;2009;2009;2011;2012;2013;2014;2015;2015;2015;2015;2015	62;62;62;64;67;58;52;34;33;Unpublished;1;Unpublished;2;Unpublished
Reviewed	O14773	TPP1	Tripeptidyl-peptidase 1	210	RYnLTSQDVGSGTSNNSQACAQFLEQYFHDSDLAQFMR	VTGTVGLHLGVTPSVIRKRYNLTSQDVGSGTSNNSQACAQF	Breast cell lines;Ovarian tumor	2012;2015	52;Unpublished
Reviewed	O14773	TPP1	Tripeptidyl-peptidase 1	210	KRYnITSQDVGSGTSNNSQACAQFIEQYFHDSDIAQFMR	VTGTVGLHLGVTPSVIRKRYNLTSQDVGSGTSNNSQACAQF	DLBCL cell lines (Diffuse large B-cell lymphoma)	2014	16
Reviewed	O14773	TPP1	Tripeptidyl-peptidase 1	210	KRYnLTSQDVGSGTSNNSQACAQFLEQYFHDSDLAQFMR	VTGTVGLHLGVTPSVIRKRYNLTSQDVGSGTSNNSQACAQF	Breast cell lines	2012	52
Reviewed	O14773	TPP1	Tripeptidyl-peptidase 1	222	NLTSQDVGSGTSnNSQ	PSVIRKRYNLTSQDVGSGTSNNSQACAQFLEQYFHDSDLAQ	Liver	2014	33
Reviewed	O14773	TPP1	Tripeptidyl-peptidase 1	222	YNITSQDVGSGTSnNS	PSVIRKRYNLTSQDVGSGTSNNSQACAQFLEQYFHDSDLAQ	Liver	2014	32
Reviewed	O14773	TPP1	Tripeptidyl-peptidase 1	222	LTSQDVGSGTSnNSQAC	PSVIRKRYNLTSQDVGSGTSNNSQACAQFLEQYFHDSDLAQ	Liver	2009	64
Reviewed	O14773	TPP1	Tripeptidyl-peptidase 1	222	NLTSQDVGSGTSnNSQA	PSVIRKRYNLTSQDVGSGTSNNSQACAQFLEQYFHDSDLAQ	Liver	2014	33
Reviewed	O14773	TPP1	Tripeptidyl-peptidase 1	222	YNLTSQDVGSGTSnNSQ	PSVIRKRYNLTSQDVGSGTSNNSQACAQFLEQYFHDSDLAQ	Liver	2014	33
Reviewed	O14773	TPP1	Tripeptidyl-peptidase 1	222	NLTSQDVGSGTSnNSQAC	PSVIRKRYNLTSQDVGSGTSNNSQACAQFLEQYFHDSDLAQ	Liver	2014	33
Reviewed	O14773	TPP1	Tripeptidyl-peptidase 1	222	RYNLTSQDVGSGTSnNSQ	PSVIRKRYNLTSQDVGSGTSNNSQACAQFLEQYFHDSDLAQ	Liver	2014	33
Reviewed	O14773	TPP1	Tripeptidyl-peptidase 1	222	YNLTSQDVGSGTSnNSQA	PSVIRKRYNLTSQDVGSGTSNNSQACAQFLEQYFHDSDLAQ	Pancreatic islets;Prostate;Liver;Prostate tumor	2012;2014;2014;2015	48;14;33;Unpublished
Reviewed	O14773	TPP1	Tripeptidyl-peptidase 1	222	RYNLTSQDVGSGTSnNSQA	PSVIRKRYNLTSQDVGSGTSNNSQACAQFLEQYFHDSDLAQ	HEK293T cell line (embryonic kidney);Liver	2011;2014	57;33
Reviewed	O14773	TPP1	Tripeptidyl-peptidase 1	222	TSQDVGSGTSnNSQACAQF	PSVIRKRYNLTSQDVGSGTSNNSQACAQFLEQYFHDSDLAQ	Liver	2014	33
Reviewed	O14773	TPP1	Tripeptidyl-peptidase 1	222	YNLTSQDVGSGTSnNSQAC	PSVIRKRYNLTSQDVGSGTSNNSQACAQFLEQYFHDSDLAQ	Pancreatic islets	2012	48
Reviewed	O14773	TPP1	Tripeptidyl-peptidase 1	222	KRYNLTSQDVGSGTSnNSQA	PSVIRKRYNLTSQDVGSGTSNNSQACAQFLEQYFHDSDLAQ	Urine;Sample information lost;Liver	2007;2007;2014	Unpublished;Unpublished;33
Reviewed	O14773	TPP1	Tripeptidyl-peptidase 1	222	NLTSQDVGSGTSnNSQACAQ	PSVIRKRYNLTSQDVGSGTSNNSQACAQFLEQYFHDSDLAQ	Liver	2014	33
Reviewed	O14773	TPP1	Tripeptidyl-peptidase 1	222	YNLTSQDVGSGTSnNSQACA	PSVIRKRYNLTSQDVGSGTSNNSQACAQFLEQYFHDSDLAQ	Prostate;Prostate tumor	2014;2015	14;Unpublished
Reviewed	O14773	TPP1	Tripeptidyl-peptidase 1	222	NLTSQDVGSGTSnNSQACAQF	PSVIRKRYNLTSQDVGSGTSNNSQACAQFLEQYFHDSDLAQ	Liver	2014	33
Reviewed	O14773	TPP1	Tripeptidyl-peptidase 1	222	YNLTSQDVGSGTSnNSQACAQ	PSVIRKRYNLTSQDVGSGTSNNSQACAQFLEQYFHDSDLAQ	Liver	2014	33
Reviewed	O14773	TPP1	Tripeptidyl-peptidase 1	222	YNLTSQDVGSGTSnNSQACAQF	PSVIRKRYNLTSQDVGSGTSNNSQACAQFLEQYFHDSDLAQ	Liver	2014	33
Reviewed	O14773	TPP1	Tripeptidyl-peptidase 1	222	RYNLTSQDVGSGTSnNSQACAQF	PSVIRKRYNLTSQDVGSGTSNNSQACAQFLEQYFHDSDLAQ	Liver	2014	33
Reviewed	O14773	TPP1	Tripeptidyl-peptidase 1	222	YNLTSQDVGSGTSnNSQACAQFLE	PSVIRKRYNLTSQDVGSGTSNNSQACAQFLEQYFHDSDLAQ	Liver	2014	33
Reviewed	O14773	TPP1	Tripeptidyl-peptidase 1	222	RYNLTSQDVGSGTSnNSQACAQFLE	PSVIRKRYNLTSQDVGSGTSNNSQACAQFLEQYFHDSDLAQ	Liver	2014	33
Reviewed	O14773	TPP1	Tripeptidyl-peptidase 1	222	KRYNLTSQDVGSGTSnNSQACAQFLE	PSVIRKRYNLTSQDVGSGTSNNSQACAQFLEQYFHDSDLAQ	Liver	2014	33
Reviewed	O14773	TPP1	Tripeptidyl-peptidase 1	222	YNLTSQDVGSGTSnNSQACAQFLEQY	PSVIRKRYNLTSQDVGSGTSNNSQACAQFLEQYFHDSDLAQ	Liver	2014	33
Reviewed	O14773	TPP1	Tripeptidyl-peptidase 1	222	YNLTSQDVGSGTSnNSQACAQFLEQYFHDSDLAQF	PSVIRKRYNLTSQDVGSGTSNNSQACAQFLEQYFHDSDLAQ	Liver	2014	33
Reviewed	O14773	TPP1	Tripeptidyl-peptidase 1	222	YNITSQDVGSGTSnNSQACAQFIEQYFHDSDIAQFMR	PSVIRKRYNLTSQDVGSGTSNNSQACAQFLEQYFHDSDLAQ	DLBCL cell lines (Diffuse large B-cell lymphoma);Liver tumor (HCC)	2014;2014	16;32
Reviewed	O14773	TPP1	Tripeptidyl-peptidase 1	222	YNLTSQDVGSGTSnNSQACAQFLEQYFHDSDLAQFMR	PSVIRKRYNLTSQDVGSGTSNNSQACAQFLEQYFHDSDLAQ	TPC-1 Cell Line (Thyroid Cance);XTC-1 Cell Line (Thyroid Cance);DRO-1 Cell Line (Thyroid Cance);Liver;HeLa cell line (Cervical cancer);Colorectal cancer cell line, HCT-116 (colorectal cancer);Breast cell lines;Ovarian tumor;Liver;Ovarian tumor;OVCAR-3 cell line (Ovarian cancer);Platelet;LNCap/PC3 cell lines (Prostate cancer);Serum	2009;2009;2009;2009;2009;2011;2012;2013;2014;2015;2015;2015;2015;2015	62;62;62;64;67;58;52;34;33;Unpublished;1;Unpublished;2;Unpublished
Reviewed	O14773	TPP1	Tripeptidyl-peptidase 1	222	RYNLTSQDVGSGTSnNSQACAQFLEQYFHDSDLAQFMR	PSVIRKRYNLTSQDVGSGTSNNSQACAQFLEQYFHDSDLAQ	Breast cell lines;Ovarian tumor	2012;2015	52;Unpublished
Reviewed	O14773	TPP1	Tripeptidyl-peptidase 1	222	KRYNITSQDVGSGTSnNSQACAQFIEQYFHDSDIAQFMR	PSVIRKRYNLTSQDVGSGTSNNSQACAQFLEQYFHDSDLAQ	DLBCL cell lines (Diffuse large B-cell lymphoma)	2014	16
Reviewed	O14773	TPP1	Tripeptidyl-peptidase 1	222	KRYNLTSQDVGSGTSnNSQACAQFLEQYFHDSDLAQFMR	PSVIRKRYNLTSQDVGSGTSNNSQACAQFLEQYFHDSDLAQ	Breast cell lines	2012	52
Reviewed	O14773	TPP1	Tripeptidyl-peptidase 1	286	SAGAnISTW	RGRAGIEASLDVQYLMSAGANISTWVYSSPGRHEGQEPFLQ	Liver	2014	33
Reviewed	O14773	TPP1	Tripeptidyl-peptidase 1	286	MSAGAnISTW	RGRAGIEASLDVQYLMSAGANISTWVYSSPGRHEGQEPFLQ	Liver	2014	33
Reviewed	O14773	TPP1	Tripeptidyl-peptidase 1	286	LMSAGAnISTW	RGRAGIEASLDVQYLMSAGANISTWVYSSPGRHEGQEPFLQ	Liver	2014	33
Reviewed	O14773	TPP1	Tripeptidyl-peptidase 1	286	SAGAnISTWVY	RGRAGIEASLDVQYLMSAGANISTWVYSSPGRHEGQEPFLQ	Liver	2014	33
Reviewed	O14773	TPP1	Tripeptidyl-peptidase 1	286	MSAGAnISTWVY	RGRAGIEASLDVQYLMSAGANISTWVYSSPGRHEGQEPFLQ	Liver	2014	33
Reviewed	O14773	TPP1	Tripeptidyl-peptidase 1	286	nISTWVYSSPGR	RGRAGIEASLDVQYLMSAGANISTWVYSSPGRHEGQEPFLQ	OVCAR-3 cell line (Ovarian cancer)	2015	1
Reviewed	O14773	TPP1	Tripeptidyl-peptidase 1	286	YLMSAGAnISTW	RGRAGIEASLDVQYLMSAGANISTWVYSSPGRHEGQEPFLQ	Liver	2014	33
Reviewed	O14773	TPP1	Tripeptidyl-peptidase 1	286	LMSAGAnISTWVY	RGRAGIEASLDVQYLMSAGANISTWVYSSPGRHEGQEPFLQ	Liver	2014	33
Reviewed	O14773	TPP1	Tripeptidyl-peptidase 1	286	VQYLMSAGAnISTW	RGRAGIEASLDVQYLMSAGANISTWVYSSPGRHEGQEPFLQ	Liver	2014	33
Reviewed	O14773	TPP1	Tripeptidyl-peptidase 1	286	SAGAnISTWVYSSPGR	RGRAGIEASLDVQYLMSAGANISTWVYSSPGRHEGQEPFLQ	Ovarian tumor	2015	Unpublished
Reviewed	O14773	TPP1	Tripeptidyl-peptidase 1	286	VQYLMSAGAnISTWVY	RGRAGIEASLDVQYLMSAGANISTWVYSSPGRHEGQEPFLQ	Liver	2014	33
Reviewed	O14773	TPP1	Tripeptidyl-peptidase 1	286	MSAGAnISTWVYSSPGR	RGRAGIEASLDVQYLMSAGANISTWVYSSPGRHEGQEPFLQ	Urine;Urine;Prostate tumor	2007;2007;2007	Unpublished;Unpublished
Reviewed	O14773	TPP1	Tripeptidyl-peptidase 1	286	AGIEASLDVQYLMSAGAnISTWVYSSPGR	RGRAGIEASLDVQYLMSAGANISTWVYSSPGRHEGQEPFLQ	LNCap/PC3 cell lines (Prostate cancer)	2015	2
Reviewed	O14773	TPP1	Tripeptidyl-peptidase 1	313	LMLLSnES	SSPGRHEGQEPFLQWLMLLSNESALPHVHTVSYGDDEDSLS	Liver	2014	33
Reviewed	O14773	TPP1	Tripeptidyl-peptidase 1	313	SnESALPH	SSPGRHEGQEPFLQWLMLLSNESALPHVHTVSYGDDEDSLS	Liver	2014	33
Reviewed	O14773	TPP1	Tripeptidyl-peptidase 1	313	WLMLLSnE	SSPGRHEGQEPFLQWLMLLSNESALPHVHTVSYGDDEDSLS	Liver	2014	33
Reviewed	O14773	TPP1	Tripeptidyl-peptidase 1	313	LSnESALPH	SSPGRHEGQEPFLQWLMLLSNESALPHVHTVSYGDDEDSLS	Liver;Liver	2009;2014	64;33
Reviewed	O14773	TPP1	Tripeptidyl-peptidase 1	313	QWLMLLSnE	SSPGRHEGQEPFLQWLMLLSNESALPHVHTVSYGDDEDSLS	Liver	2014	33
Reviewed	O14773	TPP1	Tripeptidyl-peptidase 1	313	LLSnESALPH	SSPGRHEGQEPFLQWLMLLSNESALPHVHTVSYGDDEDSLS	Liver;Liver	2009;2014	64;33
Reviewed	O14773	TPP1	Tripeptidyl-peptidase 1	313	LMLLSnESAL	SSPGRHEGQEPFLQWLMLLSNESALPHVHTVSYGDDEDSLS	Liver	2014	33
Reviewed	O14773	TPP1	Tripeptidyl-peptidase 1	313	SnESALPHVH	SSPGRHEGQEPFLQWLMLLSNESALPHVHTVSYGDDEDSLS	Liver	2014	33
Reviewed	O14773	TPP1	Tripeptidyl-peptidase 1	313	LMLLSnESALP	SSPGRHEGQEPFLQWLMLLSNESALPHVHTVSYGDDEDSLS	Liver	2014	33
Reviewed	O14773	TPP1	Tripeptidyl-peptidase 1	313	LSnESALPHVH	SSPGRHEGQEPFLQWLMLLSNESALPHVHTVSYGDDEDSLS	Liver	2014	33
Reviewed	O14773	TPP1	Tripeptidyl-peptidase 1	313	MLLSnESALPH	SSPGRHEGQEPFLQWLMLLSNESALPHVHTVSYGDDEDSLS	Liver	2014	33
Reviewed	O14773	TPP1	Tripeptidyl-peptidase 1	313	LLSnESALPHVH	SSPGRHEGQEPFLQWLMLLSNESALPHVHTVSYGDDEDSLS	Liver	2014	33
Reviewed	O14773	TPP1	Tripeptidyl-peptidase 1	313	LMLLSnESALPH	SSPGRHEGQEPFLQWLMLLSNESALPHVHTVSYGDDEDSLS	Liver	2014	33
Reviewed	O14773	TPP1	Tripeptidyl-peptidase 1	313	LMLLSnESALPHV	SSPGRHEGQEPFLQWLMLLSNESALPHVHTVSYGDDEDSLS	Liver	2014	33
Reviewed	O14773	TPP1	Tripeptidyl-peptidase 1	313	MLLSnESALPHVH	SSPGRHEGQEPFLQWLMLLSNESALPHVHTVSYGDDEDSLS	Liver	2014	33
Reviewed	O14773	TPP1	Tripeptidyl-peptidase 1	313	LMLLSnESALPHVH	SSPGRHEGQEPFLQWLMLLSNESALPHVHTVSYGDDEDSLS	Liver	2014	33
Reviewed	O14773	TPP1	Tripeptidyl-peptidase 1	313	QWLMLLSnESALPH	SSPGRHEGQEPFLQWLMLLSNESALPHVHTVSYGDDEDSLS	Liver	2014	33
Reviewed	O14773	TPP1	Tripeptidyl-peptidase 1	313	GQEPFLQWLMLLSnE	SSPGRHEGQEPFLQWLMLLSNESALPHVHTVSYGDDEDSLS	Liver	2014	33
Reviewed	O14773	TPP1	Tripeptidyl-peptidase 1	313	LQWLMLLSnESALPH	SSPGRHEGQEPFLQWLMLLSNESALPHVHTVSYGDDEDSLS	Liver	2014	33
Reviewed	O14773	TPP1	Tripeptidyl-peptidase 1	313	LLSnESALPHVHTVSY	SSPGRHEGQEPFLQWLMLLSNESALPHVHTVSYGDDEDSLS	Liver	2014	33
Reviewed	O14773	TPP1	Tripeptidyl-peptidase 1	313	HEGQEPFLQWLMLLSnE	SSPGRHEGQEPFLQWLMLLSNESALPHVHTVSYGDDEDSLS	Liver	2014	33
Reviewed	O14773	TPP1	Tripeptidyl-peptidase 1	313	LQWLMLLSnESALPHVH	SSPGRHEGQEPFLQWLMLLSNESALPHVHTVSYGDDEDSLS	Liver	2014	33
Reviewed	O14773	TPP1	Tripeptidyl-peptidase 1	313	HEGQEPFLQWLMLLSnESALPH	SSPGRHEGQEPFLQWLMLLSNESALPHVHTVSYGDDEDSLS	Liver	2014	33
Reviewed	O14773	TPP1	Tripeptidyl-peptidase 1	313	HEGQEPFLQWLMLLSnESALPHVH	SSPGRHEGQEPFLQWLMLLSNESALPHVHTVSYGDDEDSLS	Ovarian tumor	2015	Unpublished
Reviewed	O14773	TPP1	Tripeptidyl-peptidase 1	313	SnESALPHVHTVSYGDDEDSLSSAY	SSPGRHEGQEPFLQWLMLLSNESALPHVHTVSYGDDEDSLS	Liver	2014	33
Reviewed	O14773	TPP1	Tripeptidyl-peptidase 1	313	LLSnESALPHVHTVSYGDDEDSLSSAY	SSPGRHEGQEPFLQWLMLLSNESALPHVHTVSYGDDEDSLS	Liver	2014	33
Reviewed	O14773	TPP1	Tripeptidyl-peptidase 1	313	SSPGRHEGQEPFLQWLMLLSnESALPH	SSPGRHEGQEPFLQWLMLLSNESALPHVHTVSYGDDEDSLS	Liver	2014	33
Reviewed	O14773	TPP1	Tripeptidyl-peptidase 1	313	MLLSnESALPHVHTVSYGDDEDSLSSAY	SSPGRHEGQEPFLQWLMLLSNESALPHVHTVSYGDDEDSLS	Liver	2014	33
Reviewed	O14773	TPP1	Tripeptidyl-peptidase 1	313	SnESALPHVHTVSYGDDEDSLSSAYIQR	SSPGRHEGQEPFLQWLMLLSNESALPHVHTVSYGDDEDSLS	Liver;Ovarian tumor	2014;2015	33;Unpublished
Reviewed	O14773	TPP1	Tripeptidyl-peptidase 1	313	LMLLSnESALPHVHTVSYGDDEDSLSSAY	SSPGRHEGQEPFLQWLMLLSNESALPHVHTVSYGDDEDSLS	Liver	2014	33
Reviewed	O14773	TPP1	Tripeptidyl-peptidase 1	313	LSnESALPHVHTVSYGDDEDSLSSAYIQR	SSPGRHEGQEPFLQWLMLLSNESALPHVHTVSYGDDEDSLS	Urine;Liver;Ovarian tumor;Urine;Prostate tumor	2007;2014;2015;2007;2007	33;Unpublished;Unpublished
Reviewed	O14773	TPP1	Tripeptidyl-peptidase 1	313	LLSnESALPHVHTVSYGDDEDSLSSAYIQR	SSPGRHEGQEPFLQWLMLLSNESALPHVHTVSYGDDEDSLS	HEK293T cell line (embryonic kidney);Pancreatic islets;Liver;Liver;Ovarian tumor	2011;2012;2014;2014;2015	57;48;19;33;Unpublished
Reviewed	O14773	TPP1	Tripeptidyl-peptidase 1	313	MLLSnESALPHVHTVSYGDDEDSLSSAYIQR	SSPGRHEGQEPFLQWLMLLSNESALPHVHTVSYGDDEDSLS	Pancreatic islets;Liver;Ovarian tumor	2012;2014;2015	48;33;Unpublished
Reviewed	O14773	TPP1	Tripeptidyl-peptidase 1	313	LMLLSnESALPHVHTVSYGDDEDSLSSAYIQR	SSPGRHEGQEPFLQWLMLLSNESALPHVHTVSYGDDEDSLS	Liver;Liver;Ovarian tumor	2014;2014;2015	19;33;Unpublished
Reviewed	O14773	TPP1	Tripeptidyl-peptidase 1	313	LQWLMLLSnESALPHVHTVSYGDDEDSLSSAYIQR	SSPGRHEGQEPFLQWLMLLSNESALPHVHTVSYGDDEDSLS	Ovarian tumor	2015	Unpublished
Reviewed	O14773	TPP1	Tripeptidyl-peptidase 1	313	HEGQEPFIQWIMIISnESAIPHVHTVSYGDDEDSISSAYIQR	SSPGRHEGQEPFLQWLMLLSNESALPHVHTVSYGDDEDSLS	Liver tumor (HCC)	2014	32
Reviewed	O14773	TPP1	Tripeptidyl-peptidase 1	313	HEGQEPFLQWLMLLSnESALPHVHTVSYGDDEDSLSSAYIQR	SSPGRHEGQEPFLQWLMLLSNESALPHVHTVSYGDDEDSLS	Colorectal cancer cell line, HCT-116 (colorectal cancer);Breast cell lines;Liver;Ovarian tumor;OVCAR-3 cell line (Ovarian cancer);LNCap/PC3 cell lines (Prostate cancer)	2011;2012;2014;2015;2015;2015	58;52;33;Unpublished;1;2
Reviewed	O14773	TPP1	Tripeptidyl-peptidase 1	443	FnASGR	EEAVTKFLSSSPHLPPSSYFNASGRAYPDVAALSDGYWVVS	Liver	2014	33
Reviewed	O14773	TPP1	Tripeptidyl-peptidase 1	443	YFnASGR	EEAVTKFLSSSPHLPPSSYFNASGRAYPDVAALSDGYWVVS	Liver	2014	33
Reviewed	O14773	TPP1	Tripeptidyl-peptidase 1	443	SYFnASGR	EEAVTKFLSSSPHLPPSSYFNASGRAYPDVAALSDGYWVVS	Liver;Ovarian tumor	2014;2015	33;Unpublished
Reviewed	O14773	TPP1	Tripeptidyl-peptidase 1	443	SSYFnASGR	EEAVTKFLSSSPHLPPSSYFNASGRAYPDVAALSDGYWVVS	Liver	2014	33
Reviewed	O14773	TPP1	Tripeptidyl-peptidase 1	443	FnASGRAYPD	EEAVTKFLSSSPHLPPSSYFNASGRAYPDVAALSDGYWVVS	Liver	2009	64
Reviewed	O14773	TPP1	Tripeptidyl-peptidase 1	443	PSSYFnASGR	EEAVTKFLSSSPHLPPSSYFNASGRAYPDVAALSDGYWVVS	Pancreatic islets	2012	48
Reviewed	O14773	TPP1	Tripeptidyl-peptidase 1	443	nASGRAYPDVA	EEAVTKFLSSSPHLPPSSYFNASGRAYPDVAALSDGYWVVS	Liver	2014	33
Reviewed	O14773	TPP1	Tripeptidyl-peptidase 1	443	PPSSYFnASGR	EEAVTKFLSSSPHLPPSSYFNASGRAYPDVAALSDGYWVVS	Pancreatic islets	2012	48
Reviewed	O14773	TPP1	Tripeptidyl-peptidase 1	443	FnASGRAYPDVA	EEAVTKFLSSSPHLPPSSYFNASGRAYPDVAALSDGYWVVS	Liver	2014	33
Reviewed	O14773	TPP1	Tripeptidyl-peptidase 1	443	LPPSSYFnASGR	EEAVTKFLSSSPHLPPSSYFNASGRAYPDVAALSDGYWVVS	Pancreatic islets;Liver;Ovarian tumor	2012;2014;2015	48;33;Unpublished
Reviewed	O14773	TPP1	Tripeptidyl-peptidase 1	443	nASGRAYPDVAAL	EEAVTKFLSSSPHLPPSSYFNASGRAYPDVAALSDGYWVVS	Liver	2014	33
Reviewed	O14773	TPP1	Tripeptidyl-peptidase 1	443	PPSSYFnASGRAY	EEAVTKFLSSSPHLPPSSYFNASGRAYPDVAALSDGYWVVS	Breast Cancer cell lines	2013	37
Reviewed	O14773	TPP1	Tripeptidyl-peptidase 1	443	FnASGRAYPDVAAL	EEAVTKFLSSSPHLPPSSYFNASGRAYPDVAALSDGYWVVS	Liver	2014	33
Reviewed	O14773	TPP1	Tripeptidyl-peptidase 1	443	nASGRAYPDVAALS	EEAVTKFLSSSPHLPPSSYFNASGRAYPDVAALSDGYWVVS	Liver	2014	33
Reviewed	O14773	TPP1	Tripeptidyl-peptidase 1	443	PHLPPSSYFnASGR	EEAVTKFLSSSPHLPPSSYFNASGRAYPDVAALSDGYWVVS	Pancreatic islets	2012	48
Reviewed	O14773	TPP1	Tripeptidyl-peptidase 1	443	nASGRAYPDVAALSD	EEAVTKFLSSSPHLPPSSYFNASGRAYPDVAALSDGYWVVS	Liver	2014	33
Reviewed	O14773	TPP1	Tripeptidyl-peptidase 1	443	SPHLPPSSYFnASGR	EEAVTKFLSSSPHLPPSSYFNASGRAYPDVAALSDGYWVVS	Liver	2014	33
Reviewed	O14773	TPP1	Tripeptidyl-peptidase 1	443	FLSSSPHLPPSSYFnA	EEAVTKFLSSSPHLPPSSYFNASGRAYPDVAALSDGYWVVS	Prostate;Liver	2014;2014	14;33
Reviewed	O14773	TPP1	Tripeptidyl-peptidase 1	443	FnASGRAYPDVAALSD	EEAVTKFLSSSPHLPPSSYFNASGRAYPDVAALSDGYWVVS	Liver	2014	33
Reviewed	O14773	TPP1	Tripeptidyl-peptidase 1	443	SSPHLPPSSYFnASGR	EEAVTKFLSSSPHLPPSSYFNASGRAYPDVAALSDGYWVVS	Pancreatic islets;Liver;Ovarian tumor	2012;2014;2015	48;33;Unpublished
Reviewed	O14773	TPP1	Tripeptidyl-peptidase 1	443	FLSSSPHLPPSSYFnAS	EEAVTKFLSSSPHLPPSSYFNASGRAYPDVAALSDGYWVVS	Liver	2014	33
Reviewed	O14773	TPP1	Tripeptidyl-peptidase 1	443	nASGRAYPDVAALSDGY	EEAVTKFLSSSPHLPPSSYFNASGRAYPDVAALSDGYWVVS	Liver	2014	33
Reviewed	O14773	TPP1	Tripeptidyl-peptidase 1	443	SSSPHLPPSSYFnASGR	EEAVTKFLSSSPHLPPSSYFNASGRAYPDVAALSDGYWVVS	Pancreatic islets;Prostate;Liver;Ovarian tumor	2012;2014;2014;2015	48;14;33;Unpublished
Reviewed	O14773	TPP1	Tripeptidyl-peptidase 1	443	FLSSSPHLPPSSYFnASG	EEAVTKFLSSSPHLPPSSYFNASGRAYPDVAALSDGYWVVS	Pancreatic islets	2012	48
Reviewed	O14773	TPP1	Tripeptidyl-peptidase 1	443	FnASGRAYPDVAALSDGY	EEAVTKFLSSSPHLPPSSYFNASGRAYPDVAALSDGYWVVS	Liver	2014	33
Reviewed	O14773	TPP1	Tripeptidyl-peptidase 1	443	LSSSPHLPPSSYFnASGR	EEAVTKFLSSSPHLPPSSYFNASGRAYPDVAALSDGYWVVS	Pancreatic islets;Liver	2012;2014	48;33
Reviewed	O14773	TPP1	Tripeptidyl-peptidase 1	443	nASGRAYPDVAALSDGYW	EEAVTKFLSSSPHLPPSSYFNASGRAYPDVAALSDGYWVVS	Liver	2014	33
Reviewed	O14773	TPP1	Tripeptidyl-peptidase 1	443	FISSSPHIPPSSYFnASGR	EEAVTKFLSSSPHLPPSSYFNASGRAYPDVAALSDGYWVVS	Spermatozoa;DLBCL cell lines (Diffuse large B-cell lymphoma);Liver tumor (HCC);Liver	2013;2014;2014;2014	43;16;32;32
Reviewed	O14773	TPP1	Tripeptidyl-peptidase 1	443	FLSSSPHLPPSSYFnASGR	EEAVTKFLSSSPHLPPSSYFNASGRAYPDVAALSDGYWVVS	LnCap cell line (Prostate cancer);Urine;IGROV-1/CP cell line (Ovarian cancer)IGROV-1/CP;TPC-1 Cell Line (Thyroid Cance);FTC-133 Cell Line (Thyroid Cance);XTC-1 Cell Line (Thyroid Cance);ARO Cell Line (Thyroid Cance);DRO-1 Cell Line (Thyroid Cance);HCCLM3 cell line (Liver);Liver;HeLa cell line (Cervical cancer);Colorectal tumors;Saliva;Colorectal cancer cell line, HCT-116 (colorectal cancer);Breas…	2003;2007;2007;2009;2009;2009;2009;2009;2009;2009;2009;2009;2011;2011;2012;2012;2012;2012;2012;2013;2013;2013;2013;2013;2013;2013;2014;2014;2014;2014;2014;2014;2014;2015;2015;2015;2015;2015;2015;2015;2015;2015;2015;2015;2015;2007;2007;2007;2007;2007;2007;2007;2007	83;75;62;62;62;62;62;63;64;67;68;56;58;3;48;50;50;52;34;34;34;38;38;40;45;13;14;15;18;19;22;33;1;2;12;Unpublished;Unpublished;Unpublished;Unpublished;Unpublished;Unpublished;Unpublished;Unpublished
Reviewed	O14773	TPP1	Tripeptidyl-peptidase 1	443	FnASGRAYPDVAALSDGYW	EEAVTKFLSSSPHLPPSSYFNASGRAYPDVAALSDGYWVVS	Liver	2014	33
Reviewed	O14773	TPP1	Tripeptidyl-peptidase 1	443	nASGRAYPDVAALSDGYWVVSN	EEAVTKFLSSSPHLPPSSYFNASGRAYPDVAALSDGYWVVS	Liver	2014	33
Reviewed	O14773	TPP1	Tripeptidyl-peptidase 1	443	AVTKFLSSSPHLPPSSYFnASGR	EEAVTKFLSSSPHLPPSSYFNASGRAYPDVAALSDGYWVVS	Liver	2014	33
Reviewed	O14773	TPP1	Tripeptidyl-peptidase 1	443	LSSSPHLPPSSYFnASGRAYPDVAAL	EEAVTKFLSSSPHLPPSSYFNASGRAYPDVAALSDGYWVVS	Liver	2014	33
Reviewed	O14773	TPP1	Tripeptidyl-peptidase 1	443	nASGRAYPDVAALSDGYWVVSNRVPIPW	EEAVTKFLSSSPHLPPSSYFNASGRAYPDVAALSDGYWVVS	Liver	2014	33
Reviewed	O14773	TPP1	Tripeptidyl-peptidase 1	443	FnASGRAYPDVAALSDGYWVVSNRVPIPW	EEAVTKFLSSSPHLPPSSYFNASGRAYPDVAALSDGYWVVS	Liver	2014	33
Reviewed	O14773	TPP1	Tripeptidyl-peptidase 1	443	LSSSPHLPPSSYFnASGRAYPDVAALSDGYW	EEAVTKFLSSSPHLPPSSYFNASGRAYPDVAALSDGYWVVS	Liver	2014	33
Reviewed	O14773	TPP1	Tripeptidyl-peptidase 1	443	LSSSPHLPPSSYFnASGRAYPDVAALSDGYWVVSNRVPIPW	EEAVTKFLSSSPHLPPSSYFNASGRAYPDVAALSDGYWVVS	Liver	2014	33
Reviewed	O14786	NRP1	Neuropilin-1	150	CSQnYTTPSGVIK	HGAGFSIRYEIFKRGPECSQNYTTPSGVIKSPGFPEKYPNS	Liver	2014	33
Reviewed	O14786	NRP1	Neuropilin-1	150	GPECSQnYTTPSG	HGAGFSIRYEIFKRGPECSQNYTTPSGVIKSPGFPEKYPNS	Breast Cancer cell lines	2013	37
Reviewed	O14786	NRP1	Neuropilin-1	150	GPECSQnYTTPSGVIK	HGAGFSIRYEIFKRGPECSQNYTTPSGVIKSPGFPEKYPNS	Urine;prostate cancer cell lines;HCCLM3 cell line (Liver);Prostate stromal cell line;Serum;ovarian tumor;Breast tumor;Pancreatic islets;Serum (HCC); HCC cell lines (Liver);umbilical vein Endothelial CellsJurkat T cell line;Non-small Cell Lung Carcinoma;Colorectal tumor;Liver;LNCap/PC3 cell lines (Prostate cancer);Breast cancer xenografts;Urine;Serum;Urine;Serum;Urine;Serum;Prostate tumor;Breast t…	2007;2007;2009;2009;2010;2011;2012;2012;2013;2013;2013;2014;2014;2014;2014;2015;2015;2015;2015;2015;2015;2007;2007;2007;2007;2007;2007	72;63;65;40;54;3;48;38;40;44;13;18;22;33;2;10;Unpublished;Unpublished;Unpublished;Unpublished;Unpublished;Unpublished
Reviewed	O14786	NRP1	Neuropilin-1	150	RGPECSQnYTTPSGVIK	HGAGFSIRYEIFKRGPECSQNYTTPSGVIKSPGFPEKYPNS	Plasma;prostate cancer cell lines;TPC-1 Cell Line (Thyroid Cance);Liver;Prostate stromal cell line;Pancreatic islets;Serum;Plasma; Jurkat T cell line;Prostate;HEK293 cell line (embryonic kidney);Liver tumor (HCC);Liver;Liver;Ovarian tumor;LNCap/PC3 cell lines (Prostate cancer);Breast cancer xenografts;Prostate tumor;Urine;Serum;Urine;Plasma;HEK293T cell line (embryonic kidney), HEK293T cell line …	2005;2007;2009;2009;2009;2012;2013;2014;2014;2014;2014;2014;2014;2014;2015;2015;2015;2015;2015;2015;2015;2015;2015;2015;	81;72;62;64;65;48;42;13;13;14;15;32;32;33;Unpublished;2;Unpublished;Unpublished;Unpublished;Unpublished;Unpublished;8;9;12;Unpublished
Reviewed	O14786	NRP1	Neuropilin-1	261	KEGFSAnYSVIQS	GILSMVFYTDSAIAKEGFSANYSVLQSSVSEDFKCMEALGM	Breast Cancer cell lines	2013	37
Reviewed	O14786	NRP1	Neuropilin-1	261	TDSAIAKEGFSAnY	GILSMVFYTDSAIAKEGFSANYSVLQSSVSEDFKCMEALGM	Liver	2014	33
Reviewed	O14786	NRP1	Neuropilin-1	261	YTDSAIAKEGFSAnY	GILSMVFYTDSAIAKEGFSANYSVLQSSVSEDFKCMEALGM	Liver	2014	33
Reviewed	O14786	NRP1	Neuropilin-1	261	GFSAnYSVLQSSVSEDFK	GILSMVFYTDSAIAKEGFSANYSVLQSSVSEDFKCMEALGM	Liver	2014	33
Reviewed	O14786	NRP1	Neuropilin-1	261	EGFSAnYSVIQSSVSEDFK	GILSMVFYTDSAIAKEGFSANYSVLQSSVSEDFKCMEALGM	Liver tumor (HCC);Liver	2014;2014	32;32
Reviewed	O14786	NRP1	Neuropilin-1	261	EGFSAnYSVLQSSVSEDFK	GILSMVFYTDSAIAKEGFSANYSVLQSSVSEDFKCMEALGM	prostate cancer cell lines;TPC-1 Cell Line (Thyroid Cance);HCCLM3 cell line (Liver);Liver;Pancreatic islets;SKOV-3 cell line (Ovarian cancer);Ovarian tumor; HCC cell lines (Liver);Serum;Plasma;Prostate;Colorectal tumor;Liver;Ovarian tumor;OVCAR-3 cell line (Ovarian cancer);LNCap/PC3 cell lines (Prostate cancer);Prostate tumor;Urine;Serum;Urine;Urine;Serum;Serum;Prostate tumor;Breast tumor;Breast …	2007;2009;2009;2009;2012;2013;2013;2013;2013;2014;2014;2014;2014;2015;2015;2015;2015;2015;2015;2015;2015;2015;2007;2007;2007;2007	72;62;63;64;48;34;34;40;42;13;14;22;33;1;2;10;Unpublished;Unpublished;Unpublished;Unpublished
Reviewed	O14786	NRP1	Neuropilin-1	300	STnWSAER	GMESGEIHSDQITASSQYSTNWSAERSRLNYPENGWTPGED	Liver	2014	33
Reviewed	O14786	NRP1	Neuropilin-1	522	IGYSNnGSDWK	GGKHRENKVFMRKFKIGYSNNGSDWKMIMDDSKRKAKSFEG	prostate cancer cell lines;Colorectal cancer cell line, HCT-116 (colorectal cancer);Pancreatic islets;HuH-7 cell line (Liver);Serum (HCC); HCC cell lines (Liver);plasma; Jurkat T cell line;HEK293 cell line (embryonic kidney);DLBCL cell lines (Diffuse large B-cell lymphoma);Non-small Cell Lung Carcinoma;Colorectal tumor;Liver;LNCap/PC3 cell lines (Prostate cancer);Urine;Serum;Urine;Plasma;Serum;He…	2007;2011;2012;2013;2013;2013;2013;2014;2014;2014;2014;2014;2014;2015;2015;2015;2015;2015;2015;2015;	72;58;48;38;38;40;45;13;15;16;18;22;33;2;Unpublished;Unpublished;Unpublished;8;10;12;Unpublished
Reviewed	O14786	NRP1	Neuropilin-1	522	KIGYSNnGSDW	GGKHRENKVFMRKFKIGYSNNGSDWKMIMDDSKRKAKSFEG	Liver	2014	33
Reviewed	O14786	NRP1	Neuropilin-1	522	IGYSNnGSDWKM	GGKHRENKVFMRKFKIGYSNNGSDWKMIMDDSKRKAKSFEG	Liver	2009	64
Reviewed	O14786	NRP1	Neuropilin-1	522	KIGYSNnGSDWKM	GGKHRENKVFMRKFKIGYSNNGSDWKMIMDDSKRKAKSFEG	Breast Cancer cell lines	2013	37
Reviewed	O14791	APOL1	Apolipoprotein L1	261	EFLGEnISNFLSLAGNTYQLTR	HDLVIKSLDKLKEVREFLGENISNFLSLAGNTYQLTRGIGK	Plasma;Serum;Serum;Prostate tumor	2005;2015;2007;2007	81;Unpublished;Unpublished
Reviewed	O14792	HS3ST1	Heparan sulfate glucosamine 3-O-sulfotransferase 1	242	LSPQInASNFYFNK	RDPFPEIQKVERFLKLSPQINASNFYFNKTKGFYCLRDSGR	Non-small Cell Lung Carcinoma	2014	18
Reviewed	O14792	HS3ST1	Heparan sulfate glucosamine 3-O-sulfotransferase 1	242	FLKLSPQInASNFYFNK	RDPFPEIQKVERFLKLSPQINASNFYFNKTKGFYCLRDSGR	Colorectal cancer cell line, HCT-116 (colorectal cancer)	2011	58
Reviewed	O14792	HS3ST1	Heparan sulfate glucosamine 3-O-sulfotransferase 1	249	LSPQINASNFYFnK	QKVERFLKLSPQINASNFYFNKTKGFYCLRDSGRDRCLHES	Non-small Cell Lung Carcinoma	2014	18
Reviewed	O14792	HS3ST1	Heparan sulfate glucosamine 3-O-sulfotransferase 1	249	FLKLSPQINASNFYFnK	QKVERFLKLSPQINASNFYFNKTKGFYCLRDSGRDRCLHES	Colorectal cancer cell line, HCT-116 (colorectal cancer)	2011	58
Reviewed	O14798	TNFRSF10C	Tumor necrosis factor receptor superfamily member 10C	77	SEHTGACNPCTEGVDYTnASNNEPSCFPCTVCK	SHRSEHTGACNPCTEGVDYTNASNNEPSCFPCTVCKSDQKH	Urine;Urine;Urine;Urine	2013;2015;2015;2015;	45;Unpublished;Unpublished;Unpublished;Unpublished
Reviewed	O14802	POLR3A	DNA-directed RNA polymerase III subunit RPC1	355	FRGnLSGKRVDFSGR	KKWTRGFVQRLKGKQGRFRGNLSGKRVDFSGRTVISPDPNL	Serum;Prostate tumor	2007;2007	Unpublished;Unpublished
Reviewed	O14802	POLR3A	DNA-directed RNA polymerase III subunit RPC1	791	LDKSNSPLTMALCGSKGSFInISQMIACVGQQAISGSR	LDKSNSPLTMALCGSKGSFINISQMIACVGQQAISGSRVPD	Prostate tumor;Breast tumor	2007;2007	Unpublished;Unpublished
Reviewed	O14817	TSPAN4	Tetraspanin-4	152	CCGVSnYTDWFE	VGLTNAWSIIQTDFRCCGVSNYTDWFEVYNATRVPDSCCLE	Liver	2014	33
Reviewed	O14817	TSPAN4	Tetraspanin-4	152	CCGVSnYTDWFEVYNATR	VGLTNAWSIIQTDFRCCGVSNYTDWFEVYNATRVPDSCCLE	HeLa cell line (Cervical cancer);Breast cell lines;Liver	2009;2012;2014	67;52;33
Reviewed	O14817	TSPAN4	Tetraspanin-4	161	VYnATRVPD	IQTDFRCCGVSNYTDWFEVYNATRVPDSCCLEFSESCGLHA	Liver	2014	33
Reviewed	O14817	TSPAN4	Tetraspanin-4	161	nATRVPDSCCL	IQTDFRCCGVSNYTDWFEVYNATRVPDSCCLEFSESCGLHA	Liver	2014	33
Reviewed	O14817	TSPAN4	Tetraspanin-4	161	VYnATRVPDSCCLE	IQTDFRCCGVSNYTDWFEVYNATRVPDSCCLEFSESCGLHA	Liver	2014	33
Reviewed	O14817	TSPAN4	Tetraspanin-4	161	EVYnATRVPDSCCLE	IQTDFRCCGVSNYTDWFEVYNATRVPDSCCLEFSESCGLHA	Liver	2009	64
Reviewed	O14817	TSPAN4	Tetraspanin-4	161	CCGVSNYTDWFEVYnATR	IQTDFRCCGVSNYTDWFEVYNATRVPDSCCLEFSESCGLHA	HeLa cell line (Cervical cancer);Breast cell lines;Liver	2009;2012;2014	67;52;33
Reviewed	O14836	TNFRSF13B	Tumor necrosis factor receptor superfamily member 13B	128	SGEVEnNSDNSGRYQGIEHR	LRSPVNLPPELRRQRSGEVENNSDNSGRYQGLEHRGSEASP	DLBCL cell lines (Diffuse large B-cell lymphoma)	2014	16
Reviewed	O14894	TM4SF5	Transmembrane 4 L6 family member 5	138	LLnRTL	CLMNGEWGYHFEDTAGAYLLNRTLWDRCEAPPRVVPWNVTL	Liver	2014	33
Reviewed	O14894	TM4SF5	Transmembrane 4 L6 family member 5	138	DTAGAYLLnR	CLMNGEWGYHFEDTAGAYLLNRTLWDRCEAPPRVVPWNVTL	Liver	2014	33
Reviewed	O14904	WNT9A	Protein Wnt-9a	103	WnCTLEGR	VEAVSMSALECQFQFRFERWNCTLEGRYRASLLKRGFKETA	Liver	2014	33
Reviewed	O14917	PCDH17	Protocadherin-17	22	NLnYSVPEEQGAGTVIGNIGR	YLSICCCFLLWAPALTLKNLNYSVPEEQGAGTVIGNIGRDA	Urine;Urine	2015;2015;	Unpublished;Unpublished;Unpublished
Reviewed	O14917	PCDH17	Protocadherin-17	439	ETQDEYnVTIVAR	DNFYTVVTDRPLDRETQDEYNVTIVARDGGSPPLNSTKSFA	Urine;Pancreatic islets;Urine;Urine;Urine;Prostate tumor;Cerebrospinal fluid	2007;2012;2015;2015;2007;2007;2007	48;Unpublished;Unpublished;Unpublished
Reviewed	O14917	PCDH17	Protocadherin-17	566	PAHIESnATVRVT	KAFEFKVLAKDSGAPAHLESNATVRVTVLDVNDNAPVIVLP	Breast Cancer cell lines	2013	37
Reviewed	O14917	PCDH17	Protocadherin-17	566	DSGAPAHLESnATVR	KAFEFKVLAKDSGAPAHLESNATVRVTVLDVNDNAPVIVLP	Urine;Pancreatic islets;Colorectal tumor;Urine;Urine;Urine;Prostate tumor	2007;2012;2014;2015;2015;2007;2007	48;22;Unpublished;Unpublished
Reviewed	O14950	MYL12B	Myosin regulatory light chain 12B	82	MNEAPGPInFTMFLTMFGEK	GKNPTDAYLDAMMNEAPGPINFTMFLTMFGEKLNGTDPEDV	Serum;Prostate tumor	2007;2007	Unpublished;Unpublished
Reviewed	O14950	MYL12B	Myosin regulatory light chain 12B	95	LnGTDPEDVIR	NEAPGPINFTMFLTMFGEKLNGTDPEDVIRNAFACFDEEAT	Urine;Hela cell line (cervical cancer);Colorectal tumor;Platelet;Breast cancer xenografts;Prostate tumor;Urine;Urine;Urine;Prostate tumor	2007;2014;2014;2015;2015;2015;2015;2015;2007;2007	17;22;Unpublished;Unpublished
Reviewed	O14950	MYL12B	Myosin regulatory light chain 12B	95	KLnGTDPEDVIR	NEAPGPINFTMFLTMFGEKLNGTDPEDVIRNAFACFDEEAT	Urine;Urine	2015;2015;	Unpublished;Unpublished;Unpublished
Reviewed	O14964	HGS	Hepatocyte growth factor-regulated tyrosine kinase substrate	313	AEPMPSASSAPPASSLYSSPVnSSAPLAEDIDPELAR	EPMPSASSAPPASSLYSSPVNSSAPLAEDIDPELARYLNRN	Liver	2014	33
Reviewed	O14965	AURKA	Aurora kinase A	52	VLCPSnSSQR	PCQNPLPVNSGQAQRVLCPSNSSQRVPLQAQKLVSSHKPVQ	ovarian tumor;Prostate tumor;Ovarian tumor	2011;2007;2007	54;Unpublished;Unpublished
Reviewed	O14976	GAK	Cyclin-G-associated kinase	221	nTTPMYRTPEIIDLYSNFPIGEK	YPDYSWSAQRRALVEEEITRNTTPMYRTPEIIDLYSNFPIG	Colorectal tumors	2009	68
Reviewed	O14976	GAK	Cyclin-G-associated kinase	1152	ACTQPRPNYASnFSVIGAR	PPQAKPPPKACTQPRPNYASNFSVIGAREERGVRAPSFAQK	Prostate tumor;Ovarian tumor	2007;2007	Unpublished;Unpublished
Reviewed	O14981	BTAF1	TATA-binding protein-associated factor 172	1228	LMPLEAGIPDPPnMSAELIQLKAKER	QCFATLIRLMPLEAGIPDPPNMSAELIQLKAKERHFLEQLL	Serum	2007	Unpublished
Reviewed	O14981	BTAF1	TATA-binding protein-associated factor 172	1604	nSSLHDIQHAPK	LVLTPQHPEFKTTAEKLAVQNSSLHDIQHAPKLSALKQLLL	OVCAR-3 cell line (Ovarian cancer)	2015	1
Reviewed	O14981	BTAF1	TATA-binding protein-associated factor 172	1630	nGSTSESGTESVVAQHR	IQHAPKLSALKQLLLDCGLGNGSTSESGTESVVAQHRILIF	OVCAR-3 cell line (Ovarian cancer)	2015	1
Reviewed	O14983	ATP2A1	Sarcoplasmic/endoplasmic reticulum calcium ATPase 1	739	TASEMVLADDnFSTIVAAVEEGR	AMGSGTAVAKTASEMVLADDNFSTIVAAVEEGRAIYNNMKQ	Prostate;Prostate tumor	2014;2015	14;Unpublished
Reviewed	O14983	ATP2A1	Sarcoplasmic/endoplasmic reticulum calcium ATPase 1	919	NALNSLSEnQSLLR	MALSVLVTIEMCNALNSLSENQSLLRMPPWVNIWLLGSICL	Urine	2007	Unpublished
Reviewed	O15014	ZNF609	Zinc finger protein 609	451	NKPLSDMELnSSSEDSK	KASPSSANKRKNKPLSDMELNSSSEDSKGSKRVRTNSMGSA	Serum;Prostate tumor	2007;2007	Unpublished;Unpublished
Reviewed	O15014	ZNF609	Zinc finger protein 609	451	RKNKPLSDMELnSSSEDSKGSKR	KASPSSANKRKNKPLSDMELNSSSEDSKGSKRVRTNSMGSA	Urine	2007	Unpublished
Reviewed	O15014	ZNF609	Zinc finger protein 609	775	nGSSDPHQSR	EGKSPFRESSGDGMKMEGLLNGSSDPHQSRLASIKAEADKI	OVCAR-3 cell line (Ovarian cancer)	2015	1
Reviewed	O15018	PDZD2	PDZ domain-containing protein 2	839	EAnSSPGLGTPLK	SEQEMDEVIARSTYQESKEANSSPGLGTPLKSPSLAKKDSL	Urine;Urine;Prostate tumor	2007;2007;2007	Unpublished;Unpublished
Reviewed	O15018	PDZD2	PDZ domain-containing protein 2	1058	nLTDSAEAPK	SVDLEESIPEGMVDAASYAANLTDSAEAPKGSPGSWWKKEL	OVCAR-3 cell line (Ovarian cancer)	2015	1
Reviewed	O15018	PDZD2	PDZ domain-containing protein 2	1144	RSEAEAKPSGSQTVnLTGR	VSPHCKRSEAEAKPSGSQTVNLTGRANDPCDLDSRVQATSV	Colorectal tumors	2009	68
Reviewed	O15018	PDZD2	PDZ domain-containing protein 2	1522	LSnYSR	SVLDSINPDKHFTVNKNFLSNYSRNFSSFHEDSTSLSGLGD	Pancreatic islets	2012	48
Reviewed	O15018	PDZD2	PDZ domain-containing protein 2	2403	SLSSCSEnQSEAGTLLPQMAK	GHPGDAAARLLRRSLSSCSENQSEAGTLLPQMAKSPSIMTL	Colorectal tumors	2009	68
Reviewed	O15027	SEC16A	Protein transport protein Sec16A	1370	QnGTVVGTDIAELLLR	LIDKESASLLWNFIVLLCRQNGTVVGTDIAELLLRDHRTVW	Colorectal tumors	2009	68
Reviewed	O15031	PLXNB2	Plexin-B2	127	SnISLRL	KRLVECGSLFKGICALRALSNISLRLFYEDGSGEKSFVASN	Liver	2014	33
Reviewed	O15031	PLXNB2	Plexin-B2	127	AISnISIR	KRLVECGSLFKGICALRALSNISLRLFYEDGSGEKSFVASN	DLBCL cell lines (Diffuse large B-cell lymphoma)	2014	16
Reviewed	O15031	PLXNB2	Plexin-B2	127	ALSnISLR	KRLVECGSLFKGICALRALSNISLRLFYEDGSGEKSFVASN	Urine;prostate cancer cell lines;Platelet Plasma membranes;TPC-1 Cell Line (Thyroid Cance);XTC-1 Cell Line (Thyroid Cance);HCCLM3 cell line (Liver);Liver;ovarian tumor;SW1990 cell line (Pancreatic cancer);Pancreatic islets;22Rv1 cell line (prostate cancer);SKOV-3 cell line (Ovarian cancer); HCC cell lines (Liver);PlasmaJurkat T cell line;Prostate;HEK293 cell line (embryonic kidney);Hela cell line…	2007;2007;2007;2009;2009;2009;2009;2011;2012;2012;2012;2013;2013;2014;2014;2014;2014;2014;2014;2014;2015;2015;2015;2015;2015;2015;2015;2015;2015;2015;2007;2007;2007;2007;2007;2007;2007	72;74;62;62;63;64;54;47;48;50;34;40;13;13;14;15;17;22;33;1;2;12;Unpublished;Unpublished;Unpublished;Unpublished;Unpublished;Unpublished;Unpublished
Reviewed	O15031	PLXNB2	Plexin-B2	127	RALSnISLR	KRLVECGSLFKGICALRALSNISLRLFYEDGSGEKSFVASN	Liver	2014	33
Reviewed	O15031	PLXNB2	Plexin-B2	127	RALSnISLRLF	KRLVECGSLFKGICALRALSNISLRLFYEDGSGEKSFVASN	Liver	2014	33
Reviewed	O15031	PLXNB2	Plexin-B2	127	AIRAISnISIRIF	KRLVECGSLFKGICALRALSNISLRLFYEDGSGEKSFVASN	Breast Cancer cell lines	2013	37
Reviewed	O15031	PLXNB2	Plexin-B2	242	NQQDKHPARnRTLL	FEDGPYVFFVFNQQDKHPARNRTLLARMCREDPNYYSYLEM	Liver	2014	33
Reviewed	O15031	PLXNB2	Plexin-B2	391	GGLnLTAVTVAAE	YPLGSRDGLRGTAVLQRGGLNLTAVTVAAENNHTVAFLGTS	Liver	2014	33
Reviewed	O15031	PLXNB2	Plexin-B2	391	nLTAVTVAAENNHTVAF	YPLGSRDGLRGTAVLQRGGLNLTAVTVAAENNHTVAFLGTS	Liver	2014	33
Reviewed	O15031	PLXNB2	Plexin-B2	391	GGLnLTAVTVAAENNHTVAF	YPLGSRDGLRGTAVLQRGGLNLTAVTVAAENNHTVAFLGTS	Liver	2014	33
Reviewed	O15031	PLXNB2	Plexin-B2	391	GGLnLTAVTVAAENNHTVAFL	YPLGSRDGLRGTAVLQRGGLNLTAVTVAAENNHTVAFLGTS	Liver	2014	33
Reviewed	O15031	PLXNB2	Plexin-B2	391	QRGGLnLTAVTVAAENNHTVAF	YPLGSRDGLRGTAVLQRGGLNLTAVTVAAENNHTVAFLGTS	Liver	2014	33
Reviewed	O15031	PLXNB2	Plexin-B2	391	GGInITAVTVAAENNHTVAFIGTSDGR	YPLGSRDGLRGTAVLQRGGLNLTAVTVAAENNHTVAFLGTS	DLBCL cell lines (Diffuse large B-cell lymphoma);Liver tumor (HCC);Liver	2014;2014;2014	16;32;32
Reviewed	O15031	PLXNB2	Plexin-B2	391	GGLnLTAVTVAAENNHTVAFLGTSDGR	YPLGSRDGLRGTAVLQRGGLNLTAVTVAAENNHTVAFLGTS	XTC-1 Cell Line (Thyroid Cance);ARO Cell Line (Thyroid Cance);Colorectal cancer cell line, HCT-116 (colorectal cancer);Pancreatic islets;Breast cell lines;Liver;Ovarian tumor;OVCAR-3 cell line (Ovarian cancer);Platelet;LNCap/PC3 cell lines (Prostate cancer);Breast cancer xenografts;Urine;Serum;Urine;Hela cell line (cervical cancer);Serum;Prostate tumor;Breast tumor;Breast cancer cell lines;Cerebr…	2009;2009;2011;2012;2012;2014;2015;2015;2015;2015;2015;2015;2015;2015;2015;2007;2007;2007;2007;2007	62;62;58;48;52;33;1;2;12;Unpublished;Unpublished;Unpublished;Unpublished;Unpublished
Reviewed	O15031	PLXNB2	Plexin-B2	402	AAENnHTVAF	TAVLQRGGLNLTAVTVAAENNHTVAFLGTSDGRILKVYLTP	Liver	2014	33
Reviewed	O15031	PLXNB2	Plexin-B2	402	VAAENnHTVAF	TAVLQRGGLNLTAVTVAAENNHTVAFLGTSDGRILKVYLTP	Liver	2014	33
Reviewed	O15031	PLXNB2	Plexin-B2	402	nHTVAFLGTSDGR	TAVLQRGGLNLTAVTVAAENNHTVAFLGTSDGRILKVYLTP	OVCAR-3 cell line (Ovarian cancer)	2015	1
Reviewed	O15031	PLXNB2	Plexin-B2	402	NnHTVAFLGTSDGR	TAVLQRGGLNLTAVTVAAENNHTVAFLGTSDGRILKVYLTP	Liver	2014	33
Reviewed	O15031	PLXNB2	Plexin-B2	402	TAVTVAAENnHTVAF	TAVLQRGGLNLTAVTVAAENNHTVAFLGTSDGRILKVYLTP	Liver	2014	33
Reviewed	O15031	PLXNB2	Plexin-B2	402	NLTAVTVAAENnHTVAF	TAVLQRGGLNLTAVTVAAENNHTVAFLGTSDGRILKVYLTP	Liver	2014	33
Reviewed	O15031	PLXNB2	Plexin-B2	402	GGLNLTAVTVAAENnHTVAF	TAVLQRGGLNLTAVTVAAENNHTVAFLGTSDGRILKVYLTP	Liver	2014	33
Reviewed	O15031	PLXNB2	Plexin-B2	402	GGLNLTAVTVAAENnHTVAFL	TAVLQRGGLNLTAVTVAAENNHTVAFLGTSDGRILKVYLTP	Liver	2014	33
Reviewed	O15031	PLXNB2	Plexin-B2	402	QRGGLNLTAVTVAAENnHTVAF	TAVLQRGGLNLTAVTVAAENNHTVAFLGTSDGRILKVYLTP	Liver	2014	33
Reviewed	O15031	PLXNB2	Plexin-B2	402	GGINITAVTVAAENnHTVAFIGTSDGR	TAVLQRGGLNLTAVTVAAENNHTVAFLGTSDGRILKVYLTP	DLBCL cell lines (Diffuse large B-cell lymphoma);Liver tumor (HCC);Liver	2014;2014;2014	16;32;32
Reviewed	O15031	PLXNB2	Plexin-B2	402	GGLNLTAVTVAAENnHTVAFLGTSDGR	TAVLQRGGLNLTAVTVAAENNHTVAFLGTSDGRILKVYLTP	XTC-1 Cell Line (Thyroid Cance);ARO Cell Line (Thyroid Cance);Colorectal cancer cell line, HCT-116 (colorectal cancer);Pancreatic islets;Breast cell lines;Liver;Ovarian tumor;OVCAR-3 cell line (Ovarian cancer);Platelet;LNCap/PC3 cell lines (Prostate cancer);Breast cancer xenografts;Urine;Serum;Urine;Hela cell line (cervical cancer);Serum;Prostate tumor;Breast tumor;Breast cancer cell lines;Cerebr…	2009;2009;2011;2012;2012;2014;2015;2015;2015;2015;2015;2015;2015;2015;2015;2007;2007;2007;2007;2007	62;62;58;48;52;33;1;2;12;Unpublished;Unpublished;Unpublished;Unpublished;Unpublished
Reviewed	O15031	PLXNB2	Plexin-B2	528	SCVAVTSAQPQnM	SHWLWSRSKSCVAVTSAQPQNMSRRAQGEVQLTVSPLPALS	Liver	2014	33
Reviewed	O15031	PLXNB2	Plexin-B2	528	TSAQPQnMSRRAQ	SHWLWSRSKSCVAVTSAQPQNMSRRAQGEVQLTVSPLPALS	Breast Cancer cell lines	2013	37
Reviewed	O15031	PLXNB2	Plexin-B2	528	SCVAVTSAQPQnMSR	SHWLWSRSKSCVAVTSAQPQNMSRRAQGEVQLTVSPLPALS	prostate cancer cell lines;Platelet Plasma membranes;TPC-1 Cell Line (Thyroid Cance);XTC-1 Cell Line (Thyroid Cance);ARO Cell Line (Thyroid Cance);Prostate stromal cell line;Colorectal cancer cell line, HCT-116 (colorectal cancer);Breast cell lines;OVCAR-3 cell line (Ovarian cancer);SKOV-3 cell line (Ovarian cancer);Ovarian tumor;UrineJurkat T cell line;Prostate;HEK293 cell line (embryonic kidney…	2007;2007;2009;2009;2009;2009;2011;2012;2013;2013;2013;2013;2014;2014;2014;2014;2014;2014;2014;2014;2014;2015;2015;2015;2015;2015;2015;2015;2015;2015;2015;2015;2007;2007;2007;2007;2007	72;74;62;62;62;65;58;52;34;34;34;45;13;14;15;17;22;25;32;32;33;1;2;3;9;12;Unpublished;Unpublished;Unpublished;Unpublished;Unpublished
Reviewed	O15031	PLXNB2	Plexin-B2	528	SCVAVTSAQPQnMSRR	SHWLWSRSKSCVAVTSAQPQNMSRRAQGEVQLTVSPLPALS	Colorectal cancer cell line, HCT-116 (colorectal cancer);Hela cell line (cervical cancer)	2011;2015	58;12
Reviewed	O15031	PLXNB2	Plexin-B2	528	SKSCVAVTSAQPQnMSR	SHWLWSRSKSCVAVTSAQPQNMSRRAQGEVQLTVSPLPALS	Colorectal cancer cell line, HCT-116 (colorectal cancer);OVCAR-3 cell line (Ovarian cancer);DLBCL cell lines (Diffuse large B-cell lymphoma);Liver;Hela cell line (cervical cancer)	2011;2013;2014;2014;2015	58;34;16;33;12
Reviewed	O15031	PLXNB2	Plexin-B2	528	SKSCVAVTSAQPQnMSRR	SHWLWSRSKSCVAVTSAQPQNMSRRAQGEVQLTVSPLPALS	Colorectal cancer cell line, HCT-116 (colorectal cancer)	2011	58
Reviewed	O15031	PLXNB2	Plexin-B2	733	LSHDAnETLPL	VTMQESGTFAFRTPKLSHDANETLPLHLYVKSYGKNIDSKL	Liver	2014	33
Reviewed	O15031	PLXNB2	Plexin-B2	733	nETLPLHLYVK	VTMQESGTFAFRTPKLSHDANETLPLHLYVKSYGKNIDSKL	OVCAR-3 cell line (Ovarian cancer)	2015	1
Reviewed	O15031	PLXNB2	Plexin-B2	733	LSHDAnETLPLH	VTMQESGTFAFRTPKLSHDANETLPLHLYVKSYGKNIDSKL	Liver	2014	33
Reviewed	O15031	PLXNB2	Plexin-B2	733	KISHDAnETIPIH	VTMQESGTFAFRTPKLSHDANETLPLHLYVKSYGKNIDSKL	Breast Cancer cell lines	2013	37
Reviewed	O15031	PLXNB2	Plexin-B2	733	SHDAnETLPLHLY	VTMQESGTFAFRTPKLSHDANETLPLHLYVKSYGKNIDSKL	Liver	2014	33
Reviewed	O15031	PLXNB2	Plexin-B2	733	LSHDAnETLPLHLY	VTMQESGTFAFRTPKLSHDANETLPLHLYVKSYGKNIDSKL	Liver	2014	33
Reviewed	O15031	PLXNB2	Plexin-B2	733	RTPKLSHDAnETLPL	VTMQESGTFAFRTPKLSHDANETLPLHLYVKSYGKNIDSKL	Liver	2014	33
Reviewed	O15031	PLXNB2	Plexin-B2	733	ISHDAnETIPIHIYVK	VTMQESGTFAFRTPKLSHDANETLPLHLYVKSYGKNIDSKL	DLBCL cell lines (Diffuse large B-cell lymphoma)	2014	16
Reviewed	O15031	PLXNB2	Plexin-B2	733	LSHDAnETLPLHLYVK	VTMQESGTFAFRTPKLSHDANETLPLHLYVKSYGKNIDSKL	Urine;prostate cancer cell lines;IGROV-1/CP cell line (Ovarian cancer)IGROV-1/CP;Liver;Saliva;Colorectal cancer cell line, HCT-116 (colorectal cancer);Pancreatic islets;Breast cell lines;OVCAR-3 cell line (Ovarian cancer);SKOV-3 cell line (Ovarian cancer);Ovarian tumorJurkat T cell line;HEK293 cell line (embryonic kidney);Non-small Cell Lung Carcinoma;Colorectal tumor;Liver;Ovarian tumor;OVCAR-3 …	2007;2007;2007;2009;2011;2011;2012;2012;2013;2013;2013;2014;2014;2014;2014;2014;2015;2015;2015;2015;2015;2015;2015;2007;2007;2007;2007;2007;2007	72;75;64;56;58;48;52;34;34;34;13;15;18;22;33;1;2;12;Unpublished;Unpublished;Unpublished;Unpublished;Unpublished;Unpublished
Reviewed	O15031	PLXNB2	Plexin-B2	733	AFRTPKLSHDAnETLPL	VTMQESGTFAFRTPKLSHDANETLPLHLYVKSYGKNIDSKL	Liver	2014	33
Reviewed	O15031	PLXNB2	Plexin-B2	733	TPKLSHDAnETLPLHLYVK	VTMQESGTFAFRTPKLSHDANETLPLHLYVKSYGKNIDSKL	Colorectal cancer cell line, HCT-116 (colorectal cancer)	2011	58
Reviewed	O15031	PLXNB2	Plexin-B2	759	nCSFGRSDCSL	HLYVKSYGKNIDSKLHVTLYNCSFGRSDCSLCRAANPDYRC	Liver	2014	33
Reviewed	O15031	PLXNB2	Plexin-B2	759	IHVTIYnCSFGR	HLYVKSYGKNIDSKLHVTLYNCSFGRSDCSLCRAANPDYRC	DLBCL cell lines (Diffuse large B-cell lymphoma);Liver tumor (HCC);Liver	2014;2014;2014	16;32;32
Reviewed	O15031	PLXNB2	Plexin-B2	759	LHVTLYnCSFGR	HLYVKSYGKNIDSKLHVTLYNCSFGRSDCSLCRAANPDYRC	LnCap cell line (Prostate cancer);Urine;ARO Cell Line (Thyroid Cance);Colorectal cancer cell line, HCT-116 (colorectal cancer);22Rv1 cell line (prostate cancer);Breast cell lines;Liver;Ovarian tumor;LNCap/PC3 cell lines (Prostate cancer);Breast cancer xenografts;Hela cell line (cervical cancer);Urine;Prostate tumor;Breast tumor;Breast cancer cell lines;Cerebrospinal fluid	2003;2007;2009;2011;2012;2012;2014;2015;2015;2015;2015;2007;2007;2007;2007;2007	83;62;58;50;52;33;2;12;Unpublished;Unpublished;Unpublished;Unpublished;Unpublished
Reviewed	O15031	PLXNB2	Plexin-B2	759	nCSFGRSDCSLC	HLYVKSYGKNIDSKLHVTLYNCSFGRSDCSLCRAANPDYRC	Liver	2014	33
Reviewed	O15031	PLXNB2	Plexin-B2	759	IHVTIYnCSFGRS	HLYVKSYGKNIDSKLHVTLYNCSFGRSDCSLCRAANPDYRC	Breast Cancer cell lines	2013	37
Reviewed	O15031	PLXNB2	Plexin-B2	759	NIDSKLHVTLYnCSFGR	HLYVKSYGKNIDSKLHVTLYNCSFGRSDCSLCRAANPDYRC	Colorectal cancer cell line, HCT-116 (colorectal cancer)	2011	58
Reviewed	O15031	PLXNB2	Plexin-B2	795	nTTSECPPPVITR	PDYRCAWCGGQSRCVYEALCNTTSECPPPVITRIQPETGPL	OVCAR-3 cell line (Ovarian cancer)	2015	1
Reviewed	O15031	PLXNB2	Plexin-B2	795	ALCnTTSECPPPVITR	PDYRCAWCGGQSRCVYEALCNTTSECPPPVITRIQPETGPL	Liver	2014	33
Reviewed	O15031	PLXNB2	Plexin-B2	795	EALCnTTSECPPPVITR	PDYRCAWCGGQSRCVYEALCNTTSECPPPVITRIQPETGPL	Liver	2014	33
Reviewed	O15031	PLXNB2	Plexin-B2	795	CVYEAICnTTSECPPPVITR	PDYRCAWCGGQSRCVYEALCNTTSECPPPVITRIQPETGPL	DLBCL cell lines (Diffuse large B-cell lymphoma)	2014	16
Reviewed	O15031	PLXNB2	Plexin-B2	795	CVYEALCnTTSECPPPVITR	PDYRCAWCGGQSRCVYEALCNTTSECPPPVITRIQPETGPL	Colorectal cancer cell line, HCT-116 (colorectal cancer);22Rv1 cell line (prostate cancer);Breast cell lines;HEK293 cell line (embryonic kidney);Hela cell line (cervical cancer);Liver;Breast cancer xenografts;Hela cell line (cervical cancer)	2011;2012;2012;2014;2014;2014;2015;2015	58;50;52;15;17;33;Unpublished;12
Reviewed	O15031	PLXNB2	Plexin-B2	844	nCSFQPER	LGSNLGVQAGDIQRISVAGRNCSFQPERYSVSTRIVCVIEA	Platelet Plasma membranes;22Rv1 cell line (prostate cancer);SKOV-3 cell line (Ovarian cancer);Prostate;HEK293 cell line (embryonic kidney);DLBCL cell lines (Diffuse large B-cell lymphoma);Colorectal tumor;Liver;Ovarian tumor;Breast cancer xenografts;Prostate tumor;Hela cell line (cervical cancer)	2007;2012;2013;2014;2014;2014;2014;2014;2015;2015;2015;2015	74;50;34;14;15;16;22;33;Unpublished;Unpublished;Unpublished;12
Reviewed	O15031	PLXNB2	Plexin-B2	844	nCSFQPERY	LGSNLGVQAGDIQRISVAGRNCSFQPERYSVSTRIVCVIEA	Liver	2014	33
Reviewed	O15031	PLXNB2	Plexin-B2	844	GRnCSFQPERY	LGSNLGVQAGDIQRISVAGRNCSFQPERYSVSTRIVCVIEA	Liver	2014	33
Reviewed	O15031	PLXNB2	Plexin-B2	844	ISVAGRnCSFQPE	LGSNLGVQAGDIQRISVAGRNCSFQPERYSVSTRIVCVIEA	Breast Cancer cell lines	2013	37
Reviewed	O15031	PLXNB2	Plexin-B2	844	ISVAGRnCSFQPER	LGSNLGVQAGDIQRISVAGRNCSFQPERYSVSTRIVCVIEA	Colorectal cancer cell line, HCT-116 (colorectal cancer);HEK293 cell line (embryonic kidney);Prostate tumor;Breast tumor;Breast cancer cell lines	2011;2014;2007;2007;2007	58;15;Unpublished;Unpublished;Unpublished
Reviewed	O15031	PLXNB2	Plexin-B2	1002	SInVTGQGF	NPVLRAFEPLRSFASGGRSINVTGQGFSLIQRFAMVVIAEP	Liver	2014	33
Reviewed	O15031	PLXNB2	Plexin-B2	1002	SGGRSInVTGQGF	NPVLRAFEPLRSFASGGRSINVTGQGFSLIQRFAMVVIAEP	Breast Cancer cell lines	2013	37
Reviewed	O15031	PLXNB2	Plexin-B2	1002	ASGGRSInVTGQGF	NPVLRAFEPLRSFASGGRSINVTGQGFSLIQRFAMVVIAEP	Liver	2014	33
Reviewed	O15031	PLXNB2	Plexin-B2	1002	SInVTGQGFSIIQR	NPVLRAFEPLRSFASGGRSINVTGQGFSLIQRFAMVVIAEP	DLBCL cell lines (Diffuse large B-cell lymphoma);Liver tumor (HCC);Liver	2014;2014;2014	16;32;32
Reviewed	O15031	PLXNB2	Plexin-B2	1002	SInVTGQGFSLIQR	NPVLRAFEPLRSFASGGRSINVTGQGFSLIQRFAMVVIAEP	LnCap cell line (Prostate cancer);XTC-1 Cell Line (Thyroid Cance);ARO Cell Line (Thyroid Cance);Colorectal cancer cell line, HCT-116 (colorectal cancer);22Rv1 cell line (prostate cancer);Breast cell lines;OVCAR-3 cell line (Ovarian cancer);SKOV-3 cell line (Ovarian cancer);Ovarian tumor; HCC cell lines (Liver)Jurkat T cell line;Prostate;HEK293 cell line (embryonic kidney);Ovarian tumor;OVCAR-3 ce…	2003;2009;2009;2011;2012;2012;2013;2013;2013;2013;2014;2014;2014;2015;2015;2015;2015;2015;2015;2015;2015;2015;2007;2007;2007;2007;2007;2007;2007	83;62;62;58;50;52;34;34;34;40;13;14;15;1;2;Unpublished;Unpublished;Unpublished;Unpublished;Unpublished;Unpublished;Unpublished
Reviewed	O15031	PLXNB2	Plexin-B2	1049	DYVFHnDTK	PREAESLQPMTVVGTDYVFHNDTKVVFLSPAVPEEPEAYNL	Liver	2014	33
Reviewed	O15031	PLXNB2	Plexin-B2	1049	VFHnDTKVVF	PREAESLQPMTVVGTDYVFHNDTKVVFLSPAVPEEPEAYNL	Liver	2014	33
Reviewed	O15031	PLXNB2	Plexin-B2	1049	TVVGTDYVFHnD	PREAESLQPMTVVGTDYVFHNDTKVVFLSPAVPEEPEAYNL	Liver	2014	33
Reviewed	O15031	PLXNB2	Plexin-B2	1049	TDYVFHnDTKVVF	PREAESLQPMTVVGTDYVFHNDTKVVFLSPAVPEEPEAYNL	Breast Cancer cell lines	2013	37
Reviewed	O15031	PLXNB2	Plexin-B2	1049	TVVGTDYVFHnDTK	PREAESLQPMTVVGTDYVFHNDTKVVFLSPAVPEEPEAYNL	Liver;Ovarian tumor	2014;2015	33;Unpublished
Reviewed	O15031	PLXNB2	Plexin-B2	1049	SLQPMTVVGTDYVFHnD	PREAESLQPMTVVGTDYVFHNDTKVVFLSPAVPEEPEAYNL	Liver	2014	33
Reviewed	O15031	PLXNB2	Plexin-B2	1049	SLQPMTVVGTDYVFHnDTK	PREAESLQPMTVVGTDYVFHNDTKVVFLSPAVPEEPEAYNL	Liver	2014	33
Reviewed	O15031	PLXNB2	Plexin-B2	1049	EAESIQPMTVVGTDYVFHnDTK	PREAESLQPMTVVGTDYVFHNDTKVVFLSPAVPEEPEAYNL	DLBCL cell lines (Diffuse large B-cell lymphoma);Liver tumor (HCC);Liver	2014;2014;2014	16;32;32
Reviewed	O15031	PLXNB2	Plexin-B2	1049	EAESLQPMTVVGTDYVFHnDTK	PREAESLQPMTVVGTDYVFHNDTKVVFLSPAVPEEPEAYNL	IGROV-1/CP cell line (Ovarian cancer)IGROV-1/CP;ARO Cell Line (Thyroid Cance);Colorectal cancer cell line, HCT-116 (colorectal cancer);Pancreatic islets;Breast cell lines;OVCAR-3 cell line (Ovarian cancer);SKOV-3 cell line (Ovarian cancer);Ovarian tumorJurkat T cell line;Prostate;HEK293 cell line (embryonic kidney);Colorectal tumor;Liver;Ovarian tumor;OVCAR-3 cell line (Ovarian cancer);Platelet;L…	2007;2009;2011;2012;2012;2013;2013;2013;2014;2014;2014;2014;2014;2015;2015;2015;2015;2015;2015;2015;2015;2015;2015;2007;2007;2007;2007;2007;2007;2007	75;62;58;48;52;34;34;34;13;14;15;22;33;1;2;9;12;Unpublished;Unpublished;Unpublished;Unpublished;Unpublished;Unpublished;Unpublished
Reviewed	O15031	PLXNB2	Plexin-B2	1068	AYnLTVLIE	HNDTKVVFLSPAVPEEPEAYNLTVLIEMDGHRALLRTEAGA	Liver	2014	33
Reviewed	O15031	PLXNB2	Plexin-B2	1068	EPEAYnLTVLIE	HNDTKVVFLSPAVPEEPEAYNLTVLIEMDGHRALLRTEAGA	Liver	2014	33
Reviewed	O15031	PLXNB2	Plexin-B2	1068	nLTVLIEMDGHR	HNDTKVVFLSPAVPEEPEAYNLTVLIEMDGHRALLRTEAGA	Liver;OVCAR-3 cell line (Ovarian cancer)	2014;2015	33;1
Reviewed	O15031	PLXNB2	Plexin-B2	1068	AYnLTVLIEMDGHR	HNDTKVVFLSPAVPEEPEAYNLTVLIEMDGHRALLRTEAGA	Liver	2014	33
Reviewed	O15031	PLXNB2	Plexin-B2	1068	nLTVLIEMDGHRALL	HNDTKVVFLSPAVPEEPEAYNLTVLIEMDGHRALLRTEAGA	Liver	2014	33
Reviewed	O15031	PLXNB2	Plexin-B2	1068	SPAVPEEPEAYnLTVLIEMDGHR	HNDTKVVFLSPAVPEEPEAYNLTVLIEMDGHRALLRTEAGA	IGROV-1/CP cell line (Ovarian cancer)IGROV-1/CP	2007	75
Reviewed	O15031	PLXNB2	Plexin-B2	1068	LSPAVPEEPEAYnLTVLIEMDGHR	HNDTKVVFLSPAVPEEPEAYNLTVLIEMDGHRALLRTEAGA	Liver	2014	33
Reviewed	O15031	PLXNB2	Plexin-B2	1068	LSPAVPEEPEAYnLTVLIEMDGHRALL	HNDTKVVFLSPAVPEEPEAYNLTVLIEMDGHRALLRTEAGA	Liver	2014	33
Reviewed	O15031	PLXNB2	Plexin-B2	1068	VVFISPAVPEEPEAYnITVIIEMDGHR	HNDTKVVFLSPAVPEEPEAYNLTVLIEMDGHRALLRTEAGA	Liver tumor (HCC);Liver	2014;2014	32;32
Reviewed	O15031	PLXNB2	Plexin-B2	1068	VVFLSPAVPEEPEAYnLTVLIEMDGHR	HNDTKVVFLSPAVPEEPEAYNLTVLIEMDGHRALLRTEAGA	Urine;OVCAR-3 cell line (Ovarian cancer);SKOV-3 cell line (Ovarian cancer);Ovarian tumor;Liver;Ovarian tumor;OVCAR-3 cell line (Ovarian cancer);Platelet;LNCap/PC3 cell lines (Prostate cancer);Breast cancer xenografts;Urine;Prostate tumor;Breast tumor;Breast cancer cell lines	2007;2013;2013;2013;2014;2015;2015;2015;2015;2015;2007;2007;2007;2007	34;34;34;33;1;2;Unpublished;Unpublished;Unpublished;Unpublished
Reviewed	O15031	PLXNB2	Plexin-B2	1099	nFTGGVK	RALLRTEAGAFEYVPDPTFENFTGGVKKQVNKLIHARGTNL	Liver	2014	33
Reviewed	O15031	PLXNB2	Plexin-B2	1099	EYVPDPTFEnF	RALLRTEAGAFEYVPDPTFENFTGGVKKQVNKLIHARGTNL	Liver	2014	33
Reviewed	O15031	PLXNB2	Plexin-B2	1099	PTFEnFTGGVK	RALLRTEAGAFEYVPDPTFENFTGGVKKQVNKLIHARGTNL	IGROV-1/CP cell line (Ovarian cancer)IGROV-1/CP;Prostate;Liver	2007;2014;2014	75;14;33
Reviewed	O15031	PLXNB2	Plexin-B2	1099	YVPDPTFEnFTGGVK	RALLRTEAGAFEYVPDPTFENFTGGVKKQVNKLIHARGTNL	Liver	2014	33
Reviewed	O15031	PLXNB2	Plexin-B2	1099	EYVPDPTFEnFTGGVK	RALLRTEAGAFEYVPDPTFENFTGGVKKQVNKLIHARGTNL	Liver	2014	33
Reviewed	O15031	PLXNB2	Plexin-B2	1099	AGAFEYVPDPTFEnFTGGVK	RALLRTEAGAFEYVPDPTFENFTGGVKKQVNKLIHARGTNL	Liver	2014	33
Reviewed	O15031	PLXNB2	Plexin-B2	1099	EYVPDPTFEnFTGGVKKQVN	RALLRTEAGAFEYVPDPTFENFTGGVKKQVNKLIHARGTNL	Liver	2014	33
Reviewed	O15031	PLXNB2	Plexin-B2	1099	TEAGAFEYVPDPTFEnFTGGVK	RALLRTEAGAFEYVPDPTFENFTGGVKKQVNKLIHARGTNL	XTC-1 Cell Line (Thyroid Cance);ARO Cell Line (Thyroid Cance);Colorectal cancer cell line, HCT-116 (colorectal cancer);22Rv1 cell line (prostate cancer);22Rv1 cell xenograft (prostate cancer);Breast cell lines;OVCAR-3 cell line (Ovarian cancer);SKOV-3 cell line (Ovarian cancer);Ovarian tumor;Prostate;HEK293 cell line (embryonic kidney);Hela cell line (cervical cancer);Colorectal tumor;K562A cell …	2009;2009;2011;2012;2012;2012;2013;2013;2013;2014;2014;2014;2014;2014;2014;2015;2015;2015;2015;2015;2015;2015;2015;2015;2007;2007;2007;2007;2007;2007;2007	62;62;58;50;50;52;34;34;34;14;15;17;22;25;33;1;2;12;Unpublished;Unpublished;Unpublished;Unpublished;Unpublished;Unpublished;Unpublished
Reviewed	O15031	PLXNB2	Plexin-B2	1099	TEAGAFEYVPDPTFEnFTGGVKK	RALLRTEAGAFEYVPDPTFENFTGGVKKQVNKLIHARGTNL	LnCap cell line (Prostate cancer);Colorectal cancer cell line, HCT-116 (colorectal cancer);22Rv1 cell line (prostate cancer);OVCAR-3 cell line (Ovarian cancer);SKOV-3 cell line (Ovarian cancer);Prostate;HEK293 cell line (embryonic kidney);DLBCL cell lines (Diffuse large B-cell lymphoma);Liver;OVCAR-3 cell line (Ovarian cancer);Platelet;LNCap/PC3 cell lines (Prostate cancer);Prostate tumor;Hela ce…	2003;2011;2012;2013;2013;2014;2014;2014;2014;2015;2015;2015;2015;2015	83;58;50;34;34;14;15;16;33;1;Unpublished;2;Unpublished;12
Reviewed	O15031	PLXNB2	Plexin-B2	1099	ALLRTEAGAFEYVPDPTFEnFTGGVK	RALLRTEAGAFEYVPDPTFENFTGGVKKQVNKLIHARGTNL	Colorectal cancer cell line, HCT-116 (colorectal cancer)	2011	58
Reviewed	O15031	PLXNB2	Plexin-B2	1099	ALLRTEAGAFEYVPDPTFEnFTGGVKK	RALLRTEAGAFEYVPDPTFENFTGGVKKQVNKLIHARGTNL	Colorectal cancer cell line, HCT-116 (colorectal cancer);Non-small Cell Lung Carcinoma;Platelet	2011;2014;2015	58;18;Unpublished
Reviewed	O15033	AREL1	Apoptosis-resistant E3 ubiquitin protein ligase 1	287	NIVERnVSTSGVSIYFEAYLYN	NNGEFDIIVLSEDEKNIVERNVSTSGVSIYFEAYLYNATNC	Urine	2007	Unpublished
Reviewed	O15033	AREL1	Apoptosis-resistant E3 ubiquitin protein ligase 1	287	nVSTSGVSIYFEAYLYNATNCSSTPWHLPPMHMTSSQR	NNGEFDIIVLSEDEKNIVERNVSTSGVSIYFEAYLYNATNC	Serum	2015	Unpublished
Reviewed	O15033	AREL1	Apoptosis-resistant E3 ubiquitin protein ligase 1	303	NVSTSGVSIYFEAYLYnATNCSSTPWHLPPMHMTSSQR	IVERNVSTSGVSIYFEAYLYNATNCSSTPWHLPPMHMTSSQ	Serum	2015	Unpublished
Reviewed	O15033	AREL1	Apoptosis-resistant E3 ubiquitin protein ligase 1	306	NVSTSGVSIYFEAYLYNATnCSSTPWHLPPMHMTSSQR	RNVSTSGVSIYFEAYLYNATNCSSTPWHLPPMHMTSSQRRP	Serum	2015	Unpublished
Reviewed	O15034	RIMBP2	RIMS-binding protein 2	235	GLVPSNFVDFVQDnESR	ELLDGQRGLVPSNFVDFVQDNESRLASTLGNEQDQNFINHS	Serum	2015	Unpublished
Reviewed	O15042	U2SURP	U2 snRNP-associated SURP motif-containing protein	465	nQTPAHVYYR	FEAMIMNREINNPMFRFLFENQTPAHVYYRWKLYSILQGDS	OVCAR-3 cell line (Ovarian cancer)	2015	1
Reviewed	O15054	KDM6B	Lysine-specific demethylase 6B	1592	FNILFVTSEnGSR	AYYCNECDVEVFNILFVTSENGSRNTYLVHCEGCARRRSAG	Serum;Breast tumor	2007;2007	Unpublished;Unpublished
Reviewed	O15056	SYNJ2	Synaptojanin-2	598	VnASTTNKK	ADIFAVGFEEMVELSAGNIVNASTTNKKMWGEQLQKAISRS	Urine	2007	Unpublished
Reviewed	O15063	KIAA0355	Uncharacterized protein KIAA0355	357	GVSFnESAADNLKLKTHTMLQLMK	CELPTVPVQIGSHFLKGVSFNESAADNLKLKTHTMLQLMKE	Urine	2007	Unpublished
Reviewed	O15066	KIF3B	Kinesin-like protein KIF3B	89	nGTIFAYGQTGTGK	QFELYDETFRPLVDSVLQGFNGTIFAYGQTGTGKTYTMEGI	OVCAR-3 cell line (Ovarian cancer)	2015	1
Reviewed	O15067	PFAS	Phosphoribosylformylglycinamidine synthase	1275	GLAPLHWADDDGNPTEQYPLNPnGSPGGVAGICSCDGR	APLHWADDDGNPTEQYPLNPNGSPGGVAGICSCDGRHLAVM	Hela cell line (cervical cancer);Liver	2014;2014	17;33
Reviewed	O15068	MCF2L	Guanine nucleotide exchange factor DBS	809	NCEGAEDLQEALSSILGILKAVnDSMHLIAITGYDGNLGDLGK	EGAEDLQEALSSILGILKAVNDSMHLIAITGYDGNLGDLGK	Serum	2015	Unpublished
Reviewed	O15072	ADAMTS3	A disintegrin and metalloproteinase with thrombospondin motifs 3	83	DVSSNPEQLFFnITAFGK	ASHKKRSARDVSSNPEQLFFNITAFGKDFHLRLKPNTQLVA	OVCAR-3 cell line (Ovarian cancer)	2015	1
Reviewed	O15075	DCLK1	Serine/threonine-protein kinase DCLK1	676	KHFNTGPKPnSTAAGVSVIAT	EHQLSVAGKIKKHFNTGPKPNSTAAGVSVIATTALDKERQV	Urine	2007	Unpublished
Reviewed	O15075	DCLK1	Serine/threonine-protein kinase DCLK1	676	IKKHFNTGPKPnSTAAGVSVIATTALDK	EHQLSVAGKIKKHFNTGPKPNSTAAGVSVIATTALDKERQV	Serum;Prostate tumor	2007;2007	Unpublished;Unpublished
Reviewed	O15078	CEP290	Centrosomal protein of 290 kDa	728	EAInYSQQLAK	LTGRNEELRQELRESRKEAINYSQQLAKANLKIDHLEKETS	Prostate tumor;Ovarian tumor	2007;2007	Unpublished;Unpublished
Reviewed	O15084	ANKRD28	Serine/threonine-protein phosphatase 6 regulatory ankyrin repeat subunit A	134	CAEALVPLLSNVnVSDRAGR	AAANKAVKCAEALVPLLSNVNVSDRAGRTALHHAAFSGHGE	Urine;Urine	2007;2007	Unpublished
Reviewed	O15091	KIAA0391	Mitochondrial ribonuclease P protein 3	296	DDnYSNKLLDILSYLR	VPMLETLKAFFDFGKDIKDDNYSNKLLDILSYLRNNQLYPG	Colorectal tumors	2009	68
Reviewed	O15117	FYB	FYN-binding protein	44	NLFNNQGnASPPAGPSNVPK	TGPNSSSGIQARKNLFNNQGNASPPAGPSNVPKFGSPKPPV	Breast cancer xenografts	2015	Unpublished
Reviewed	O15118	NPC1	Niemann-Pick C1 protein	70	nVSLCCDVR	PLPKDGYDLVQELCPGFFFGNVSLCCDVRQLQTLKDNLQLP	OVCAR-3 cell line (Ovarian cancer)	2015	1
Reviewed	O15118	NPC1	Niemann-Pick C1 protein	70	FGnVSLCCDVR	PLPKDGYDLVQELCPGFFFGNVSLCCDVRQLQTLKDNLQLP	Pancreatic islets	2012	48
Reviewed	O15118	NPC1	Niemann-Pick C1 protein	122	nVTATEDYVDPVT	YNLLNLFCELTCSPRQSQFLNVTATEDYVDPVTNQTKTNVK	OVCAR-3 cell line (Ovarian cancer)	2015	1
Reviewed	O15118	NPC1	Niemann-Pick C1 protein	122	QSQFInVTATEDYVDPVTNQTK	YNLLNLFCELTCSPRQSQFLNVTATEDYVDPVTNQTKTNVK	DLBCL cell lines (Diffuse large B-cell lymphoma);Liver tumor (HCC)	2014;2014	16;32
Reviewed	O15118	NPC1	Niemann-Pick C1 protein	122	QSQFLnVTATEDYVDPVTNQTK	YNLLNLFCELTCSPRQSQFLNVTATEDYVDPVTNQTKTNVK	prostate cancer cell lines;ovarian tumor;Breast cell lines; HCC cell lines (Liver);K562S cell line (Leukemia);K562A cell line (Leukemia);Liver;Ovarian tumor;OVCAR-3 cell line (Ovarian cancer);LNCap/PC3 cell lines (Prostate cancer);Breast cancer xenografts;Urine;Urine;Hela cell line (cervical cancer);Prostate tumor;Breast tumor;Breast cancer cell lines;Ovarian tumor;Ovarian cancer cell lines	2007;2011;2012;2013;2014;2014;2014;2015;2015;2015;2015;2015;2015;2015;2007;2007;2007;2007;2007	72;54;52;40;25;25;33;1;2;12;Unpublished;Unpublished;Unpublished;Unpublished;Unpublished
Reviewed	O15118	NPC1	Niemann-Pick C1 protein	122	QSQFLnVTATEDYVDPVTNQTKTNVK	YNLLNLFCELTCSPRQSQFLNVTATEDYVDPVTNQTKTNVK	LNCap/PC3 cell lines (Prostate cancer)	2015	2
Reviewed	O15118	NPC1	Niemann-Pick C1 protein	135	DYVDPVTnQTK	PRQSQFLNVTATEDYVDPVTNQTKTNVKELQYYVGQSFANA	Liver	2014	33
Reviewed	O15118	NPC1	Niemann-Pick C1 protein	135	VDPVTnQTKTN	PRQSQFLNVTATEDYVDPVTNQTKTNVKELQYYVGQSFANA	Liver	2009	64
Reviewed	O15118	NPC1	Niemann-Pick C1 protein	135	QSQFINVTATEDYVDPVTnQTK	PRQSQFLNVTATEDYVDPVTNQTKTNVKELQYYVGQSFANA	DLBCL cell lines (Diffuse large B-cell lymphoma);Liver tumor (HCC)	2014;2014	16;32
Reviewed	O15118	NPC1	Niemann-Pick C1 protein	135	QSQFLNVTATEDYVDPVTnQTK	PRQSQFLNVTATEDYVDPVTNQTKTNVKELQYYVGQSFANA	prostate cancer cell lines;ovarian tumor;Breast cell lines; HCC cell lines (Liver);K562S cell line (Leukemia);K562A cell line (Leukemia);Liver;Ovarian tumor;OVCAR-3 cell line (Ovarian cancer);LNCap/PC3 cell lines (Prostate cancer);Breast cancer xenografts;Urine;Urine;Hela cell line (cervical cancer);Prostate tumor;Breast tumor;Breast cancer cell lines;Ovarian tumor;Ovarian cancer cell lines	2007;2011;2012;2013;2014;2014;2014;2015;2015;2015;2015;2015;2015;2015;2007;2007;2007;2007;2007	72;54;52;40;25;25;33;1;2;12;Unpublished;Unpublished;Unpublished;Unpublished;Unpublished
Reviewed	O15118	NPC1	Niemann-Pick C1 protein	135	QSQFLNVTATEDYVDPVTnQTKTNVK	PRQSQFLNVTATEDYVDPVTNQTKTNVKELQYYVGQSFANA	LNCap/PC3 cell lines (Prostate cancer)	2015	2
Reviewed	O15118	NPC1	Niemann-Pick C1 protein	185	DADACnATNWIE	APSSNDKALGLLCGKDADACNATNWIEYMFNKDNGQAPFTI	Liver	2014	33
Reviewed	O15118	NPC1	Niemann-Pick C1 protein	185	ACnATNWIEYMFNK	APSSNDKALGLLCGKDADACNATNWIEYMFNKDNGQAPFTI	Pancreatic islets	2012	48
Reviewed	O15118	NPC1	Niemann-Pick C1 protein	185	DADACnATNWIEYMFNK	APSSNDKALGLLCGKDADACNATNWIEYMFNKDNGQAPFTI	IGROV-1/CP cell line (Ovarian cancer)IGROV-1/CP;XTC-1 Cell Line (Thyroid Cance);Colorectal cancer cell line, HCT-116 (colorectal cancer);Pancreatic islets;Breast cell lines;DLBCL cell lines (Diffuse large B-cell lymphoma);K562S cell line (Leukemia);K562A cell line (Leukemia);Liver tumor (HCC);Liver;Ovarian tumor;OVCAR-3 cell line (Ovarian cancer);LNCap/PC3 cell lines (Prostate cancer);Breast canc…	2007;2009;2011;2012;2012;2014;2014;2014;2014;2014;2015;2015;2015;2015;2007;2007;2007;2007	75;62;58;48;52;16;25;25;32;33;1;2;Unpublished;Unpublished;Unpublished;Unpublished
Reviewed	O15118	NPC1	Niemann-Pick C1 protein	222	GMEPMNnATK	PFTITPVFSDFPVHGMEPMNNATKGCDESVDEVTAPCSCQD	Pancreatic islets;Prostate;Ovarian tumor	2012;2014;2015	48;14;Unpublished
Reviewed	O15118	NPC1	Niemann-Pick C1 protein	222	SDFPVHGMEPMNnATK	PFTITPVFSDFPVHGMEPMNNATKGCDESVDEVTAPCSCQD	IGROV-1/CP cell line (Ovarian cancer)IGROV-1/CP	2007	75
Reviewed	O15118	NPC1	Niemann-Pick C1 protein	222	DNGQAPFTITPVFSDFPVHGMEPMNnATK	PFTITPVFSDFPVHGMEPMNNATKGCDESVDEVTAPCSCQD	IGROV-1/CP cell line (Ovarian cancer)IGROV-1/CP;Breast cell lines;LNCap/PC3 cell lines (Prostate cancer)	2007;2012;2015	75;52;2
Reviewed	O15118	NPC1	Niemann-Pick C1 protein	524	YCVRAPASLnDTSL	FVYADYHTHFLYCVRAPASLNDTSLLHDPCLGTFGGPVFPW	Liver	2009	64
Reviewed	O15118	NPC1	Niemann-Pick C1 protein	524	APASLnDTSLLHDPCL	FVYADYHTHFLYCVRAPASLNDTSLLHDPCLGTFGGPVFPW	IGROV-1/CP cell line (Ovarian cancer)IGROV-1/CP	2007	75
Reviewed	O15118	NPC1	Niemann-Pick C1 protein	557	nATALVITFPVNNYY	FGGPVFPWLVLGGYDDQNYNNATALVITFPVNNYYNDTEKL	OVCAR-3 cell line (Ovarian cancer)	2015	1
Reviewed	O15118	NPC1	Niemann-Pick C1 protein	572	VITFPVNNYYnDTEKL	DQNYNNATALVITFPVNNYYNDTEKLQRAQAWEKEFINFVK	Liver	2014	33
Reviewed	O15118	NPC1	Niemann-Pick C1 protein	598	KNPnLTISF	QRAQAWEKEFINFVKNYKNPNLTISFTAERSIEDELNRESD	Liver	2014	33
Reviewed	O15118	NPC1	Niemann-Pick C1 protein	598	NPnLTISFTAER	QRAQAWEKEFINFVKNYKNPNLTISFTAERSIEDELNRESD	Breast cell lines;Ovarian tumor;OVCAR-3 cell line (Ovarian cancer);Breast cancer xenografts	2012;2015;2015;2015	52;Unpublished;1;Unpublished
Reviewed	O15118	NPC1	Niemann-Pick C1 protein	598	NYKNPnITISFTAER	QRAQAWEKEFINFVKNYKNPNLTISFTAERSIEDELNRESD	DLBCL cell lines (Diffuse large B-cell lymphoma)	2014	16
Reviewed	O15118	NPC1	Niemann-Pick C1 protein	598	NYKNPnLTISFTAER	QRAQAWEKEFINFVKNYKNPNLTISFTAERSIEDELNRESD	prostate cancer cell lines;Pancreatic islets;Ovarian tumor;OVCAR-3 cell line (Ovarian cancer);LNCap/PC3 cell lines (Prostate cancer);Breast cancer xenografts;Hela cell line (cervical cancer)	2007;2012;2015;2015;2015;2015;2015	72;48;Unpublished;1;2;Unpublished;12
Reviewed	O15118	NPC1	Niemann-Pick C1 protein	916	GQNMVCGGMGCNnDSLVQQIFNAAQLDNYTR	GHDYTSSKGQNMVCGGMGCNNDSLVQQIFNAAQLDNYTRIG	Breast cell lines;K562S cell line (Leukemia);K562A cell line (Leukemia);Hela cell line (cervical cancer)	2012;2014;2014;2015	52;25;25;12
Reviewed	O15118	NPC1	Niemann-Pick C1 protein	931	IFNAAQLDnYTR	GMGCNNDSLVQQIFNAAQLDNYTRIGFAPSSWIDDYFDWVK	IGROV-1/CP cell line (Ovarian cancer)IGROV-1/CP	2007	75
Reviewed	O15118	NPC1	Niemann-Pick C1 protein	931	NAAQLDnYTRIGF	GMGCNNDSLVQQIFNAAQLDNYTRIGFAPSSWIDDYFDWVK	Liver	2014	33
Reviewed	O15118	NPC1	Niemann-Pick C1 protein	931	GQNMVCGGMGCNNDSLVQQIFNAAQLDnYTR	GMGCNNDSLVQQIFNAAQLDNYTRIGFAPSSWIDDYFDWVK	Breast cell lines;K562S cell line (Leukemia);K562A cell line (Leukemia);Hela cell line (cervical cancer)	2012;2014;2014;2015	52;25;25;12
Reviewed	O15118	NPC1	Niemann-Pick C1 protein	961	VDnITDQFCNASVVDPACVR	SWIDDYFDWVKPQSSCCRVDNITDQFCNASVVDPACVRCRP	prostate cancer cell lines;TPC-1 Cell Line (Thyroid Cance);XTC-1 Cell Line (Thyroid Cance);Pancreatic islets;Breast cell lines;SKOV-3 cell line (Ovarian cancer)Jurkat T cell line;HEK293 cell line (embryonic kidney);DLBCL cell lines (Diffuse large B-cell lymphoma);Hela cell line (cervical cancer);Colorectal tumor;Ovarian tumor;OVCAR-3 cell line (Ovarian cancer);Breast cancer xenograftsPBMC Macroph…	2007;2009;2009;2012;2012;2013;2014;2014;2014;2014;2014;2015;2015;2015;2015;2015;2007;2007;2007	72;62;62;48;52;34;13;15;16;17;22;1;12;Unpublished;Unpublished;Unpublished
Reviewed	O15118	NPC1	Niemann-Pick C1 protein	961	PQSSCCRVDnITDQFCNASVVDPACVR	SWIDDYFDWVKPQSSCCRVDNITDQFCNASVVDPACVRCRP	HuH-7 cell line (Liver)	2013	38
Reviewed	O15118	NPC1	Niemann-Pick C1 protein	968	nASVVDPACVR	DWVKPQSSCCRVDNITDQFCNASVVDPACVRCRPLTPEGKQ	OVCAR-3 cell line (Ovarian cancer)	2015	1
Reviewed	O15118	NPC1	Niemann-Pick C1 protein	968	VDNITDQFCnASVVDPACVR	DWVKPQSSCCRVDNITDQFCNASVVDPACVRCRPLTPEGKQ	prostate cancer cell lines;TPC-1 Cell Line (Thyroid Cance);XTC-1 Cell Line (Thyroid Cance);Pancreatic islets;Breast cell lines;SKOV-3 cell line (Ovarian cancer)Jurkat T cell line;HEK293 cell line (embryonic kidney);DLBCL cell lines (Diffuse large B-cell lymphoma);Hela cell line (cervical cancer);Colorectal tumor;Ovarian tumor;OVCAR-3 cell line (Ovarian cancer);Breast cancer xenograftsPBMC Macroph…	2007;2009;2009;2012;2012;2013;2014;2014;2014;2014;2014;2015;2015;2015;2015;2015;2007;2007;2007	72;62;62;48;52;34;13;15;16;17;22;1;12;Unpublished;Unpublished;Unpublished
Reviewed	O15118	NPC1	Niemann-Pick C1 protein	968	PQSSCCRVDNITDQFCnASVVDPACVR	DWVKPQSSCCRVDNITDQFCNASVVDPACVRCRPLTPEGKQ	HuH-7 cell line (Liver)	2013	38
Reviewed	O15118	NPC1	Niemann-Pick C1 protein	1064	LIASnVTE	VLQTSADFIDALKKARLIASNVTETMGINGSAYRVFPYSVF	Liver	2014	33
Reviewed	O15118	NPC1	Niemann-Pick C1 protein	1064	nVTETMGINGSAYR	VLQTSADFIDALKKARLIASNVTETMGINGSAYRVFPYSVF	OVCAR-3 cell line (Ovarian cancer)	2015	1
Reviewed	O15118	NPC1	Niemann-Pick C1 protein	1064	IIASnVTETMGINGSAYR	VLQTSADFIDALKKARLIASNVTETMGINGSAYRVFPYSVF	DLBCL cell lines (Diffuse large B-cell lymphoma)	2014	16
Reviewed	O15118	NPC1	Niemann-Pick C1 protein	1064	LIASnVTETMGINGSAYR	VLQTSADFIDALKKARLIASNVTETMGINGSAYRVFPYSVF	Urine;Pancreatic islets;Breast cell lines;Colorectal tumor;Liver;Ovarian tumor;OVCAR-3 cell line (Ovarian cancer);LNCap/PC3 cell lines (Prostate cancer);Breast cancer xenografts;Hela cell line (cervical cancer);Urine;Prostate tumor;Ovarian tumor	2007;2012;2012;2014;2014;2015;2015;2015;2015;2015;2007;2007;2007	48;52;22;33;1;2;12;Unpublished;Unpublished;Unpublished
Reviewed	O15118	NPC1	Niemann-Pick C1 protein	1072	TMGInGSAYR	IDALKKARLIASNVTETMGINGSAYRVFPYSVFYVFYEQYL	Liver	2014	33
Reviewed	O15118	NPC1	Niemann-Pick C1 protein	1072	NVTETMGInGSAYR	IDALKKARLIASNVTETMGINGSAYRVFPYSVFYVFYEQYL	OVCAR-3 cell line (Ovarian cancer)	2015	1
Reviewed	O15118	NPC1	Niemann-Pick C1 protein	1072	IIASNVTETMGInGSAYR	IDALKKARLIASNVTETMGINGSAYRVFPYSVFYVFYEQYL	DLBCL cell lines (Diffuse large B-cell lymphoma)	2014	16
Reviewed	O15118	NPC1	Niemann-Pick C1 protein	1072	LIASNVTETMGInGSAYR	IDALKKARLIASNVTETMGINGSAYRVFPYSVFYVFYEQYL	Urine;Pancreatic islets;Breast cell lines;Colorectal tumor;Liver;Ovarian tumor;OVCAR-3 cell line (Ovarian cancer);LNCap/PC3 cell lines (Prostate cancer);Breast cancer xenografts;Hela cell line (cervical cancer);Urine;Prostate tumor;Ovarian tumor	2007;2012;2012;2014;2014;2015;2015;2015;2015;2015;2007;2007;2007	48;52;22;33;1;2;12;Unpublished;Unpublished;Unpublished
Reviewed	O15123	ANGPT2	Angiopoietin-2	89	DAPLEYDDSVQRLQVLENIMEnNTQWLMK	APLEYDDSVQRLQVLENIMENNTQWLMKLENYIQDNMKKEM	Serum	2015	Unpublished
Reviewed	O15123	ANGPT2	Angiopoietin-2	151	VLnQTTR	LLNQTAEQTRKLTDVEAQVLNQTTRLELQLLEHSLSTNKLE	Prostate	2014	14
Reviewed	O15123	ANGPT2	Angiopoietin-2	151	LTDVEAQVLnQTTR	LLNQTAEQTRKLTDVEAQVLNQTTRLELQLLEHSLSTNKLE	ovarian tumor;Pancreatic islets;umbilical vein Endothelial Cells;Colorectal tumor;Breast cancer xenografts;Urine;Urine;Prostate tumor;Ovarian tumor	2011;2012;2013;2014;2015;2015;2015;2007;2007	54;48;44;22;Unpublished;Unpublished
Reviewed	O15123	ANGPT2	Angiopoietin-2	151	KLTDVEAQVLnQTTR	LLNQTAEQTRKLTDVEAQVLNQTTRLELQLLEHSLSTNKLE	Pancreatic islets;Ovarian tumor;Urine;Urine	2012;2015;2015;2015;	48;Unpublished;Unpublished;Unpublished;Unpublished
Reviewed	O15123	ANGPT2	Angiopoietin-2	240	IVTATVnNSVLQK	VSKQNSIIEELEKKIVTATVNNSVLQKQQHDLMETVNNLLT	Pancreatic islets;umbilical vein Endothelial Cells;Prostate;Colorectal tumor;Ovarian tumor	2012;2013;2014;2014;2015	48;44;14;22;Unpublished
Reviewed	O15127	SCAMP2	Secretory carrier-associated membrane protein 2	256	DnHSLAI	LVGIPGLGDSGWIAALSTLDNHSLAISVIMMVVAGFFTLCA	Liver	2014	33
Reviewed	O15131	KPNA5	Importin subunit alpha-6	404	nATSGGTPEQIR	IEILQKAEFRTRKEAAWAITNATSGGTPEQIRYLVALGCIK	OVCAR-3 cell line (Ovarian cancer)	2015	1
Reviewed	O15144	ARPC2	Actin-related protein 2/3 complex subunit 2	92	VYGSFLVNPESGYnVSLLYDLENLPASK	ADELLKRVYGSFLVNPESGYNVSLLYDLENLPASKDSIVHQ	Prostate tumor;Cerebrospinal fluid	2007;2007	Unpublished;Unpublished
Reviewed	O15162	PLSCR1	Phospholipid scramblase 1	9	DKQNSQMnAS	------------MDKQNSQMNASHPETNLPVGYPPQYPPTA	Sample information lost	2007	Unpublished
Reviewed	O15165	LDLRAD4	Low-density lipoprotein receptor class A domain-containing protein 4	101	VSTRSFINRPnQSR	VIVCLLNHYKVSTRSFINRPNQSRRREDGLPQEGCLWPSDS	Serum	2013	42
Reviewed	O15204	ADAMDEC1	ADAM DEC1	61	EIKNnQTEK	LHEIVCPKKLHILHKREIKNNQTEKHGKEERYEPEVQYQMI	Platelet;Serum	2015;2015	Unpublished;10
Reviewed	O15204	ADAMDEC1	ADAM DEC1	184	EHAVFTSNQEEQDPAnHTCGVK	STDEKEHAVFTSNQEEQDPANHTCGVKSTDGKQGPIRISRS	Urine;Plasma;Plasma;Colorectal tumor;Serum;Urine;Serum;Prostate tumor	2007;2009;2014;2014;2015;2007;2007;2007	66;13;22;10;Unpublished;Unpublished;Unpublished
Reviewed	O15204	ADAMDEC1	ADAM DEC1	184	STDEKEHAVFTSNQEEQDPAnHTCGVK	STDEKEHAVFTSNQEEQDPANHTCGVKSTDGKQGPIRISRS	Plasma;Serum	2014;2015	13;Unpublished
Reviewed	O15204	ADAMDEC1	ADAM DEC1	237	NEnLTLIR	QKYIDLYLVLDNAFYKNYNENLTLIRSFVFDVMNLLNVIYN	Urine	2007	Unpublished
Reviewed	O15204	ADAMDEC1	ADAM DEC1	237	NYNEnLTLIR	QKYIDLYLVLDNAFYKNYNENLTLIRSFVFDVMNLLNVIYN	Plasma;Colorectal tumor;Urine;Urine;Serum;Prostate tumor;Breast tumor;Ovarian tumor	2005;2014;2015;2015;2007;2007;2007;2007	81;22;Unpublished;Unpublished;Unpublished;Unpublished
Reviewed	O15213	WDR46	WD repeat-containing protein 46	338	LDVMSQNPYNAVIHLGHSnGTVSLWSPAMK	GRLDVMSQNPYNAVIHLGHSNGTVSLWSPAMKEPLAKILCH	HEK293T cell line (embryonic kidney), HEK293T cell line (embryonic kidney)	2015	9
Reviewed	O15218	GPR182	G-protein coupled receptor 182	37	LLDLFnHT	AVPTSDLGEIHNWTELLDLFNHTLSECHVELSQSTKRVVLF	Liver	2014	33
Reviewed	O15218	GPR182	G-protein coupled receptor 182	37	LLDLFnHTLSE	AVPTSDLGEIHNWTELLDLFNHTLSECHVELSQSTKRVVLF	Liver	2014	33
Reviewed	O15218	GPR182	G-protein coupled receptor 182	37	LLDLFnHTLSECHVE	AVPTSDLGEIHNWTELLDLFNHTLSECHVELSQSTKRVVLF	Liver	2014	33
Reviewed	O15226	NKRF	NF-kappa-B-repressing factor	331	DASGQPIFnASAK	LKPPEDLVVLGKDASGQPIFNASAKHWTNFVITENANDAIG	Prostate	2014	14
Reviewed	O15226	NKRF	NF-kappa-B-repressing factor	354	NDAIGILnNSASFNK	AKHWTNFVITENANDAIGILNNSASFNKMSIEYKYEMMPNR	Urine	2007	Unpublished
Reviewed	O15226	NKRF	NF-kappa-B-repressing factor	354	HWTNFVITENANDAIGILnNSASFNK	AKHWTNFVITENANDAIGILNNSASFNKMSIEYKYEMMPNR	Serum;Prostate tumor	2007;2007	Unpublished;Unpublished
Reviewed	O15226	NKRF	NF-kappa-B-repressing factor	456	nDTAQFNR	KKDIKDLVVYENSSNPVCTLNDTAQFNRMTVEYVYERMTGL	OVCAR-3 cell line (Ovarian cancer)	2015	1
Reviewed	O15230	LAMA5	Laminin subunit alpha-5	95	VAGGDPnQTIRGQ	RPTEDLYCKLVGGPVAGGDPNQTIRGQYCDICTAANSNKAH	Breast Cancer cell lines	2013	37
Reviewed	O15230	LAMA5	Laminin subunit alpha-5	95	IVGGPVAGGDPnQTIR	RPTEDLYCKLVGGPVAGGDPNQTIRGQYCDICTAANSNKAH	Spermatozoa;DLBCL cell lines (Diffuse large B-cell lymphoma)	2013;2014	43;16
Reviewed	O15230	LAMA5	Laminin subunit alpha-5	95	LVGGPVAGGDPnQTIR	RPTEDLYCKLVGGPVAGGDPNQTIRGQYCDICTAANSNKAH	HCCLM3 cell line (Liver);Liver;Pancreatic islets;22Rv1 cell line (prostate cancer);Breast cell lines;OVCAR-3 cell line (Ovarian cancer);SKOV-3 cell line (Ovarian cancer);Ovarian tumor; HCC cell lines (Liver);Urine;Prostate;HEK293 cell line (embryonic kidney);Hela cell line (cervical cancer);Non-small Cell Lung Carcinoma;Colorectal tumor;Liver;Ovarian tumor;OVCAR-3 cell line (Ovarian cancer);Breas…	2009;2009;2012;2012;2012;2013;2013;2013;2013;2013;2014;2014;2014;2014;2014;2014;2015;2015;2015;2015;2015;2015;2015;	63;64;48;50;52;34;34;34;40;45;14;15;17;18;22;33;Unpublished;1;Unpublished;Unpublished;Unpublished;Unpublished;12;Unpublished
Reviewed	O15230	LAMA5	Laminin subunit alpha-5	95	VGGPVAGGDPnQTIRGQY	RPTEDLYCKLVGGPVAGGDPNQTIRGQYCDICTAANSNKAH	Liver	2014	33
Reviewed	O15230	LAMA5	Laminin subunit alpha-5	143	YNEVnVTLD	GTERWWQSPPLSRGLEYNEVNVTLDLGQVFHVAYVLIKFAN	Liver	2014	33
Reviewed	O15230	LAMA5	Laminin subunit alpha-5	143	EYNEVnVTLDLGQVF	GTERWWQSPPLSRGLEYNEVNVTLDLGQVFHVAYVLIKFAN	Liver	2014	33
Reviewed	O15230	LAMA5	Laminin subunit alpha-5	243	nFSYSPLLR	VPLENGEIVVSLVNGRPGAMNFSYSPLLREFTKATNVRLRF	OVCAR-3 cell line (Ovarian cancer)	2015	1
Reviewed	O15230	LAMA5	Laminin subunit alpha-5	243	GRPGAMnFSYSPI	VPLENGEIVVSLVNGRPGAMNFSYSPLLREFTKATNVRLRF	Breast Cancer cell lines	2013	37
Reviewed	O15230	LAMA5	Laminin subunit alpha-5	243	PGAMnFSYSPLLR	VPLENGEIVVSLVNGRPGAMNFSYSPLLREFTKATNVRLRF	Urine;HCCLM3 cell line (Liver);Pancreatic islets;Liver;Ovarian tumor	2007;2009;2012;2014;2015	Unpublished;63;48;33;Unpublished
Reviewed	O15230	LAMA5	Laminin subunit alpha-5	243	IVVSLVNGRPGAMnF	VPLENGEIVVSLVNGRPGAMNFSYSPLLREFTKATNVRLRF	Liver	2014	33
Reviewed	O15230	LAMA5	Laminin subunit alpha-5	243	SLVNGRPGAMnFSYSPLLR	VPLENGEIVVSLVNGRPGAMNFSYSPLLREFTKATNVRLRF	Prostate tumor	2007	Unpublished
Reviewed	O15230	LAMA5	Laminin subunit alpha-5	243	IVPLENGEIVVSLVNGRPGAMnFSYSPLLR	VPLENGEIVVSLVNGRPGAMNFSYSPLLREFTKATNVRLRF	Ovarian tumor;OVCAR-3 cell line (Ovarian cancer);LNCap/PC3 cell lines (Prostate cancer)	2015;2015;2015	Unpublished;1;2
Reviewed	O15230	LAMA5	Laminin subunit alpha-5	452	CNCESDFTDGTCEDLTGRCYCRPnFSGER	ESDFTDGTCEDLTGRCYCRPNFSGERCDVCAEGFTGFPSCY	Serum	2015	10
Reviewed	O15230	LAMA5	Laminin subunit alpha-5	479	CYPTPSSSnDTR	DVCAEGFTGFPSCYPTPSSSNDTREQVLPAGQIVNCDCSAA	Liver	2014	33
Reviewed	O15230	LAMA5	Laminin subunit alpha-5	479	PTPSSSnDTREQV	DVCAEGFTGFPSCYPTPSSSNDTREQVLPAGQIVNCDCSAA	Breast Cancer cell lines	2013	37
Reviewed	O15230	LAMA5	Laminin subunit alpha-5	479	TGFPSCYPTPSSSnDTR	DVCAEGFTGFPSCYPTPSSSNDTREQVLPAGQIVNCDCSAA	Liver	2014	33
Reviewed	O15230	LAMA5	Laminin subunit alpha-5	479	GFTGFPSCYPTPSSSnDTR	DVCAEGFTGFPSCYPTPSSSNDTREQVLPAGQIVNCDCSAA	Liver	2014	33
Reviewed	O15230	LAMA5	Laminin subunit alpha-5	479	CDVCAEGFTGFPSCYPTPSSSnDTR	DVCAEGFTGFPSCYPTPSSSNDTREQVLPAGQIVNCDCSAA	HCC cell lines (Liver);Breast cancer xenografts;Hela cell line (cervical cancer)	2013;2015;2015	40;Unpublished;12
Reviewed	O15230	LAMA5	Laminin subunit alpha-5	900	FGFNPLEFEnF	EAATPEGHAVRFGFNPLEFENFSWRGYAQMAPVQPRIVARL	Liver	2014	33
Reviewed	O15230	LAMA5	Laminin subunit alpha-5	900	FGFNPLEFEnFSWR	EAATPEGHAVRFGFNPLEFENFSWRGYAQMAPVQPRIVARL	Liver;Ovarian tumor;OVCAR-3 cell line (Ovarian cancer)	2014;2015;2015	33;Unpublished;1
Reviewed	O15230	LAMA5	Laminin subunit alpha-5	921	LnLTSPDLF	FSWRGYAQMAPVQPRIVARLNLTSPDLFWLVFRYVNRGAMS	Liver	2014	33
Reviewed	O15230	LAMA5	Laminin subunit alpha-5	921	RLnLTSPDLF	FSWRGYAQMAPVQPRIVARLNLTSPDLFWLVFRYVNRGAMS	Liver	2014	33
Reviewed	O15230	LAMA5	Laminin subunit alpha-5	921	ARLnLTSPDLF	FSWRGYAQMAPVQPRIVARLNLTSPDLFWLVFRYVNRGAMS	Liver	2014	33
Reviewed	O15230	LAMA5	Laminin subunit alpha-5	921	RIVARInITSPDI	FSWRGYAQMAPVQPRIVARLNLTSPDLFWLVFRYVNRGAMS	Breast Cancer cell lines	2013	37
Reviewed	O15230	LAMA5	Laminin subunit alpha-5	921	LnLTSPDLFWLVFR	FSWRGYAQMAPVQPRIVARLNLTSPDLFWLVFRYVNRGAMS	HCCLM3 cell line (Liver);Colorectal cancer cell line, HCT-116 (colorectal cancer);HepG2 cell line (Liver);Liver;Ovarian tumor;OVCAR-3 cell line (Ovarian cancer);LNCap/PC3 cell lines (Prostate cancer);Hela cell line (cervical cancer);Prostate tumor;Bladder tumor	2009;2011;2013;2014;2015;2015;2015;2015;2007;2007	63;58;38;33;1;2;12;Unpublished;Unpublished
Reviewed	O15230	LAMA5	Laminin subunit alpha-5	959	nCTAQSQPVAFPPSTEPAFITVPQR	AMSVSGRVSVREEGRSATCANCTAQSQPVAFPPSTEPAFIT	OVCAR-3 cell line (Ovarian cancer)	2015	1
Reviewed	O15230	LAMA5	Laminin subunit alpha-5	1330	QGHAnASFCPH	HPTFPVEVLINAGRVWQGHANASFCPHGYGCRTLVVCEGQA	Liver	2014	33
Reviewed	O15230	LAMA5	Laminin subunit alpha-5	1330	nASFCPHGYGCR	HPTFPVEVLINAGRVWQGHANASFCPHGYGCRTLVVCEGQA	OVCAR-3 cell line (Ovarian cancer)	2015	1
Reviewed	O15230	LAMA5	Laminin subunit alpha-5	1330	QGHAnASFCPHGY	HPTFPVEVLINAGRVWQGHANASFCPHGYGCRTLVVCEGQA	Liver	2014	33
Reviewed	O15230	LAMA5	Laminin subunit alpha-5	1330	VWQGHAnASFCPH	HPTFPVEVLINAGRVWQGHANASFCPHGYGCRTLVVCEGQA	Breast Cancer cell lines;Ovarian tumor	2013;2015	37;Unpublished
Reviewed	O15230	LAMA5	Laminin subunit alpha-5	1330	VWQGHAnASFCPHGY	HPTFPVEVLINAGRVWQGHANASFCPHGYGCRTLVVCEGQA	Liver;Ovarian tumor	2014;2015	33;Unpublished
Reviewed	O15230	LAMA5	Laminin subunit alpha-5	1330	VWQGHAnASFCPHGYGCR	HPTFPVEVLINAGRVWQGHANASFCPHGYGCRTLVVCEGQA	HCC cell lines (Liver);Liver;Ovarian tumor;Breast cancer xenografts	2013;2014;2015;2015	40;33;Unpublished;Unpublished
Reviewed	O15230	LAMA5	Laminin subunit alpha-5	1529	nCSGPGIQELTDPTCDTDSGQCK	CLLCQPQTFGCHPLVGCEECNCSGPGIQELTDPTCDTDSGQ	OVCAR-3 cell line (Ovarian cancer)	2015	1
Reviewed	O15230	LAMA5	Laminin subunit alpha-5	1529	GCHPLVGCEECnCSGPGIQELTDPTCDTDSGQCK	CLLCQPQTFGCHPLVGCEECNCSGPGIQELTDPTCDTDSGQ	Liver	2014	33
Reviewed	O15230	LAMA5	Laminin subunit alpha-5	1529	TIPPDCLLCQPQTFGCHPLVGCEECnCSGPGIQELTDPTCDTDSGQCK	CLLCQPQTFGCHPLVGCEECNCSGPGIQELTDPTCDTDSGQ	Non-small Cell Lung Carcinoma	2014	18
Reviewed	O15230	LAMA5	Laminin subunit alpha-5	1555	QCKCRPnVTGRRC	IQELTDPTCDTDSGQCKCRPNVTGRRCDTCSPGFHGYPRCR	Breast Cancer cell lines	2013	37
Reviewed	O15230	LAMA5	Laminin subunit alpha-5	2019	ALLPGnCTR	TGPRCEICAPGFYGNALLPGNCTRCDCTPCGTEACDPHSGH	Liver;Ovarian tumor	2014;2015	33;Unpublished
Reviewed	O15230	LAMA5	Laminin subunit alpha-5	2019	GNALLPGnCTR	TGPRCEICAPGFYGNALLPGNCTRCDCTPCGTEACDPHSGH	Liver	2014	33
Reviewed	O15230	LAMA5	Laminin subunit alpha-5	2019	NAIIPGnCTRCDC	TGPRCEICAPGFYGNALLPGNCTRCDCTPCGTEACDPHSGH	Breast Cancer cell lines	2013	37
Reviewed	O15230	LAMA5	Laminin subunit alpha-5	2019	APGFYGNALLPGnCTR	TGPRCEICAPGFYGNALLPGNCTRCDCTPCGTEACDPHSGH	Pancreatic islets	2012	48
Reviewed	O15230	LAMA5	Laminin subunit alpha-5	2019	ICAPGFYGNALLPGnCTR	TGPRCEICAPGFYGNALLPGNCTRCDCTPCGTEACDPHSGH	Liver	2014	33
Reviewed	O15230	LAMA5	Laminin subunit alpha-5	2019	CEICAPGFYGNALLPGnCTR	TGPRCEICAPGFYGNALLPGNCTRCDCTPCGTEACDPHSGH	HCC cell lines (Liver);Non-small Cell Lung Carcinoma;Liver;Prostate tumor	2013;2014;2014;2007	40;18;33;Unpublished
Reviewed	O15230	LAMA5	Laminin subunit alpha-5	2196	GInASSMAWAR	DDLERAGALLPAIHEQLRGINASSMAWARLHRLNASIADLQ	ovarian tumor;Colorectal cancer cell line, HCT-116 (colorectal cancer);Pancreatic islets;HepG2 cell line (Liver); HCC cell lines (Liver);Colorectal tumor;Liver tumor (HCC);Liver;Liver;Ovarian tumor;OVCAR-3 cell line (Ovarian cancer);LNCap/PC3 cell lines (Prostate cancer);Breast cancer xenografts;Urine;Urine;Urine;Hela cell line (cervical cancer);Prostate tumor;Ovarian tumor	2011;2011;2012;2013;2013;2014;2014;2014;2014;2015;2015;2015;2015;2015;2015;2015;2015;2007;2007	54;58;48;38;40;22;32;32;33;1;2;12;Unpublished;Unpublished
Reviewed	O15230	LAMA5	Laminin subunit alpha-5	2196	EQIRGInASSMAW	DDLERAGALLPAIHEQLRGINASSMAWARLHRLNASIADLQ	Breast Cancer cell lines	2013	37
Reviewed	O15230	LAMA5	Laminin subunit alpha-5	2209	nASIADLQSQLR	HEQLRGINASSMAWARLHRLNASIADLQSQLRSPLGPRHET	OVCAR-3 cell line (Ovarian cancer)	2015	1
Reviewed	O15230	LAMA5	Laminin subunit alpha-5	2209	ARIHRInASIADI	HEQLRGINASSMAWARLHRLNASIADLQSQLRSPLGPRHET	Breast Cancer cell lines	2013	37
Reviewed	O15230	LAMA5	Laminin subunit alpha-5	2209	InASIADIQSQIR	HEQLRGINASSMAWARLHRLNASIADLQSQLRSPLGPRHET	Spermatozoa;DLBCL cell lines (Diffuse large B-cell lymphoma);Liver tumor (HCC)	2013;2014;2014	43;16;32
Reviewed	O15230	LAMA5	Laminin subunit alpha-5	2209	LnASIADLQSQLR	HEQLRGINASSMAWARLHRLNASIADLQSQLRSPLGPRHET	IGROV-1/CP cell line (Ovarian cancer)IGROV-1/CP;HCCLM3 cell line (Liver);Liver;Colorectal cancer cell line, HCT-116 (colorectal cancer);Pancreatic islets;22Rv1 cell line (prostate cancer);Breast cell lines;OVCAR-3 cell line (Ovarian cancer);SKOV-3 cell line (Ovarian cancer);Ovarian tumor;HepG2 cell line (Liver); HCC cell lines (Liver);Prostate;Hela cell line (cervical cancer);Non-small Cell Lung …	2007;2009;2009;2011;2012;2012;2012;2013;2013;2013;2013;2013;2014;2014;2014;2014;2014;2015;2015;2015;2015;2015;2015;2015;2015;2015;2007;2007;2007;2007;2007;20072007	75;63;64;58;48;50;52;34;34;34;38;40;14;17;18;22;33;1;2;12;Unpublished;Unpublished;Unpublished;Unpublished;Unpublished;UnpublishedUnpublished
Reviewed	O15230	LAMA5	Laminin subunit alpha-5	2209	RLnASIADLQSQL	HEQLRGINASSMAWARLHRLNASIADLQSQLRSPLGPRHET	Liver	2014	33
Reviewed	O15230	LAMA5	Laminin subunit alpha-5	2209	HRLnASIADLQSQL	HEQLRGINASSMAWARLHRLNASIADLQSQLRSPLGPRHET	Liver	2014	33
Reviewed	O15230	LAMA5	Laminin subunit alpha-5	2209	LHRLnASIADLQSQLR	HEQLRGINASSMAWARLHRLNASIADLQSQLRSPLGPRHET	OVCAR-3 cell line (Ovarian cancer);Non-small Cell Lung Carcinoma;Liver;OVCAR-3 cell line (Ovarian cancer);Hela cell line (cervical cancer)	2013;2014;2014;2015;2015	34;18;33;1;12
Reviewed	O15230	LAMA5	Laminin subunit alpha-5	2303	nASAPSGEQLLR	RAVDRTLSELMSQTGHLGLANASAPSGEQLLRTLAEVERLL	OVCAR-3 cell line (Ovarian cancer)	2015	1
Reviewed	O15230	LAMA5	Laminin subunit alpha-5	2303	GHIGIAnASAPSG	RAVDRTLSELMSQTGHLGLANASAPSGEQLLRTLAEVERLL	Breast Cancer cell lines	2013	37
Reviewed	O15230	LAMA5	Laminin subunit alpha-5	2303	GLAnASAPSGEQLLR	RAVDRTLSELMSQTGHLGLANASAPSGEQLLRTLAEVERLL	Ovarian tumor	2015	Unpublished
Reviewed	O15230	LAMA5	Laminin subunit alpha-5	2303	LMSQTGHLGLAnASAPSGE	RAVDRTLSELMSQTGHLGLANASAPSGEQLLRTLAEVERLL	Liver	2014	33
Reviewed	O15230	LAMA5	Laminin subunit alpha-5	2303	MSQTGHLGLAnASAPSGEQL	RAVDRTLSELMSQTGHLGLANASAPSGEQLLRTLAEVERLL	Liver	2009	64
Reviewed	O15230	LAMA5	Laminin subunit alpha-5	2303	LMSQTGHLGLAnASAPSGEQLLR	RAVDRTLSELMSQTGHLGLANASAPSGEQLLRTLAEVERLL	Liver	2014	33
Reviewed	O15230	LAMA5	Laminin subunit alpha-5	2303	TISEIMSQTGHIGIAnASAPSGEQIIR	RAVDRTLSELMSQTGHLGLANASAPSGEQLLRTLAEVERLL	Liver tumor (HCC);Liver	2014;2014	32;32
Reviewed	O15230	LAMA5	Laminin subunit alpha-5	2303	TLSELMSQTGHLGLAnASAPSGEQLLR	RAVDRTLSELMSQTGHLGLANASAPSGEQLLRTLAEVERLL	HCCLM3 cell line (Liver);Breast cell lines;OVCAR-3 cell line (Ovarian cancer);SKOV-3 cell line (Ovarian cancer);Ovarian tumor; HCC cell lines (Liver);Liver;Ovarian tumor;OVCAR-3 cell line (Ovarian cancer);Platelet;LNCap/PC3 cell lines (Prostate cancer);Breast cancer xenografts;Urine;Urine;Hela cell line (cervical cancer);Prostate tumor;Ovarian tumor	2009;2012;2013;2013;2013;2013;2014;2015;2015;2015;2015;2015;2015;2015;2015;2007;2007	63;52;34;34;34;40;33;1;2;12;Unpublished;Unpublished
Reviewed	O15230	LAMA5	Laminin subunit alpha-5	2423	DnATLQATLH	SRNQERLEEALQRKQELSRDNATLQATLHAARDTLASVFRL	Liver;Ovarian tumor	2014;2015	33;Unpublished
Reviewed	O15230	LAMA5	Laminin subunit alpha-5	2423	nATLQATLHAAR	SRNQERLEEALQRKQELSRDNATLQATLHAARDTLASVFRL	OVCAR-3 cell line (Ovarian cancer)	2015	1
Reviewed	O15230	LAMA5	Laminin subunit alpha-5	2423	DnATIQATIHAAR	SRNQERLEEALQRKQELSRDNATLQATLHAARDTLASVFRL	DLBCL cell lines (Diffuse large B-cell lymphoma)	2014	16
Reviewed	O15230	LAMA5	Laminin subunit alpha-5	2423	DnATLQATLHAAR	SRNQERLEEALQRKQELSRDNATLQATLHAARDTLASVFRL	Urine;HCCLM3 cell line (Liver);Liver;Prostate tumor;Pancreatic islets;22Rv1 cell line (prostate cancer);OVCAR-3 cell line (Ovarian cancer);SKOV-3 cell line (Ovarian cancer);Ovarian tumor; HCC cell lines (Liver);Prostate;Non-small Cell Lung Carcinoma;Colorectal tumor;Liver;Ovarian tumor;OVCAR-3 cell line (Ovarian cancer);LNCap/PC3 cell lines (Prostate cancer);Breast cancer xenografts;Prostate tumo…	2007;2009;2009;2011;2012;2012;2013;2013;2013;2013;2014;2014;2014;2014;2015;2015;2015;2015;2015;2015;2015;2015;2007;2007;2007	63;64;55;48;50;34;34;34;40;14;18;22;33;1;2;12;Unpublished;Unpublished;Unpublished
Reviewed	O15230	LAMA5	Laminin subunit alpha-5	2423	QEISRDnATIQAT	SRNQERLEEALQRKQELSRDNATLQATLHAARDTLASVFRL	Breast Cancer cell lines	2013	37
Reviewed	O15230	LAMA5	Laminin subunit alpha-5	2423	LSRDnATLQATLHAAR	SRNQERLEEALQRKQELSRDNATLQATLHAARDTLASVFRL	Liver	2014	33
Reviewed	O15230	LAMA5	Laminin subunit alpha-5	2423	QELSRDnATLQATLHAAR	SRNQERLEEALQRKQELSRDNATLQATLHAARDTLASVFRL	Ovarian tumor;OVCAR-3 cell line (Ovarian cancer)	2015;2015	Unpublished;1
Reviewed	O15230	LAMA5	Laminin subunit alpha-5	2423	KQELSRDnATLQATLHAAR	SRNQERLEEALQRKQELSRDNATLQATLHAARDTLASVFRL	Colorectal cancer cell line, HCT-116 (colorectal cancer);OVCAR-3 cell line (Ovarian cancer);SKOV-3 cell line (Ovarian cancer);Ovarian tumor;Non-small Cell Lung Carcinoma;Liver;OVCAR-3 cell line (Ovarian cancer);LNCap/PC3 cell lines (Prostate cancer)	2011;2013;2013;2013;2014;2014;2015;2015	58;34;34;34;18;33;1;2
Reviewed	O15230	LAMA5	Laminin subunit alpha-5	2501	nLSSIILDVNQDR	KLRLVEAAEAHAQQLGQLALNLSSIILDVNQDRLTQRAIEA	OVCAR-3 cell line (Ovarian cancer)	2015	1
Reviewed	O15230	LAMA5	Laminin subunit alpha-5	2501	AHAQQLGQLALnLSSIILDVNQDR	KLRLVEAAEAHAQQLGQLALNLSSIILDVNQDRLTQRAIEA	Liver	2014	33
Reviewed	O15230	LAMA5	Laminin subunit alpha-5	2501	LVEAAEAHAQQLGQLALnLSSIILDVNQDR	KLRLVEAAEAHAQQLGQLALNLSSIILDVNQDRLTQRAIEA	HCCLM3 cell line (Liver);Liver;Breast cell lines;Liver;OVCAR-3 cell line (Ovarian cancer);LNCap/PC3 cell lines (Prostate cancer);Prostate tumor;Bladder tumor;Prostate cancer metastasis to liver	2009;2009;2012;2014;2015;2015;2007;20072007	63;64;52;33;1;2;Unpublished;UnpublishedUnpublished
Reviewed	O15230	LAMA5	Laminin subunit alpha-5	2501	LVEAAEAHAQQLGQLALnLSSIILDVNQDRLTQR	KLRLVEAAEAHAQQLGQLALNLSSIILDVNQDRLTQRAIEA	HuH-7 cell line (Liver)	2013	38
Reviewed	O15230	LAMA5	Laminin subunit alpha-5	2568	AQQLLAnSTALE	HTWATVVRQGLVDRAQQLLANSTALEEAMLQEQQRLGLVWA	Liver	2014	33
Reviewed	O15230	LAMA5	Laminin subunit alpha-5	2568	LAnSTALEEAML	HTWATVVRQGLVDRAQQLLANSTALEEAMLQEQQRLGLVWA	Liver	2014	33
Reviewed	O15230	LAMA5	Laminin subunit alpha-5	2568	AQQIIAnSTAIEE	HTWATVVRQGLVDRAQQLLANSTALEEAMLQEQQRLGLVWA	Breast Cancer cell lines	2013	37
Reviewed	O15230	LAMA5	Laminin subunit alpha-5	2568	AQQLLAnSTALEE	HTWATVVRQGLVDRAQQLLANSTALEEAMLQEQQRLGLVWA	Liver	2014	33
Reviewed	O15230	LAMA5	Laminin subunit alpha-5	2568	LAnSTALEEAMLQ	HTWATVVRQGLVDRAQQLLANSTALEEAMLQEQQRLGLVWA	Liver	2014	33
Reviewed	O15230	LAMA5	Laminin subunit alpha-5	2568	nSTALEEAMLQEQQR	HTWATVVRQGLVDRAQQLLANSTALEEAMLQEQQRLGLVWA	OVCAR-3 cell line (Ovarian cancer)	2015	1
Reviewed	O15230	LAMA5	Laminin subunit alpha-5	2568	LAnSTALEEAMLQEQQRL	HTWATVVRQGLVDRAQQLLANSTALEEAMLQEQQRLGLVWA	Liver	2014	33
Reviewed	O15230	LAMA5	Laminin subunit alpha-5	2568	AQQIIAnSTAIEEAMIQEQQR	HTWATVVRQGLVDRAQQLLANSTALEEAMLQEQQRLGLVWA	Liver tumor (HCC);Liver	2014;2014	32;32
Reviewed	O15230	LAMA5	Laminin subunit alpha-5	2568	AQQLLAnSTALEEAMLQEQQR	HTWATVVRQGLVDRAQQLLANSTALEEAMLQEQQRLGLVWA	Urine;HCCLM3 cell line (Liver);Liver;ovarian tumor;Colorectal cancer cell line, HCT-116 (colorectal cancer);Pancreatic islets;22Rv1 cell line (prostate cancer);Breast cell lines;OVCAR-3 cell line (Ovarian cancer);SKOV-3 cell line (Ovarian cancer);Ovarian tumor;HepG2 cell line (Liver); HCC cell lines (Liver);Prostate;Hela cell line (cervical cancer);Non-small Cell Lung Carcinoma;Colorectal tumor;L…	2007;2009;2009;2011;2011;2012;2012;2012;2013;2013;2013;2013;2013;2014;2014;2014;2014;2014;2015;2015;2015;2015;2015;2015;2015;2015;2007;2007;2007;2007;20072007	63;64;54;58;48;50;52;34;34;34;38;40;14;17;18;22;33;1;2;12;Unpublished;Unpublished;Unpublished;Unpublished;UnpublishedUnpublished
Reviewed	O15230	LAMA5	Laminin subunit alpha-5	2568	QGLVDRAQQLLAnSTALEEAMLQEQQR	HTWATVVRQGLVDRAQQLLANSTALEEAMLQEQQRLGLVWA	Non-small Cell Lung Carcinoma	2014	18
Reviewed	O15230	LAMA5	Laminin subunit alpha-5	2707	nASLALSASIGR	EKTLPQLLAKLSILENRGVHNASLALSASIGRVRELIAQAR	OVCAR-3 cell line (Ovarian cancer)	2015	1
Reviewed	O15230	LAMA5	Laminin subunit alpha-5	2707	GVHnASLALSASIGR	EKTLPQLLAKLSILENRGVHNASLALSASIGRVRELIAQAR	Urine;Liver;Prostate;Non-small Cell Lung Carcinoma;Liver;Ovarian tumor;OVCAR-3 cell line (Ovarian cancer);Platelet;LNCap/PC3 cell lines (Prostate cancer);Breast cancer xenografts;Urine;Urine;Urine;Urine;Prostate tumor	2007;2009;2014;2014;2014;2015;2015;2015;2015;2015;2015;2015;2015;2007;2007	64;14;18;33;1;2;Unpublished;Unpublished
Reviewed	O15230	LAMA5	Laminin subunit alpha-5	3107	VDIKRInTTGVSA	VRGCVKGIKALGKYVDLKRLNTTGVSAGCTADLLVGRAMTF	Breast Cancer cell lines	2013	37
Reviewed	O15230	LAMA5	Laminin subunit alpha-5	3107	RLnTTGVSAGCTADLL	VRGCVKGIKALGKYVDLKRLNTTGVSAGCTADLLVGRAMTF	Liver	2014	33
Reviewed	O15230	LAMA5	Laminin subunit alpha-5	3107	KRLnTTGVSAGCTADLL	VRGCVKGIKALGKYVDLKRLNTTGVSAGCTADLLVGRAMTF	Liver	2014	33
Reviewed	O15230	LAMA5	Laminin subunit alpha-5	3107	LnTTGVSAGCTADLLVGR	VRGCVKGIKALGKYVDLKRLNTTGVSAGCTADLLVGRAMTF	HCCLM3 cell line (Liver);Prostate tumor;Pancreatic islets;Breast cell lines; HCC cell lines (Liver);Prostate;Non-small Cell Lung Carcinoma;Colorectal tumor;Liver;Ovarian tumor;OVCAR-3 cell line (Ovarian cancer);Breast cancer xenografts;Prostate tumor;Urine;Urine;Hela cell line (cervical cancer);Prostate tumor;Bladder tumor;Prostate cancer metastasis to liver	2009;2011;2012;2012;2013;2014;2014;2014;2014;2015;2015;2015;2015;2015;2015;2015;2007;20072007	63;55;48;52;40;14;18;22;33;1;12;Unpublished;UnpublishedUnpublished
Reviewed	O15230	LAMA5	Laminin subunit alpha-5	3107	RInTTGVSAGCTADIIVGR	VRGCVKGIKALGKYVDLKRLNTTGVSAGCTADLLVGRAMTF	Liver tumor (HCC)	2014	32
Reviewed	O15230	LAMA5	Laminin subunit alpha-5	3107	RLnTTGVSAGCTADLLVGR	VRGCVKGIKALGKYVDLKRLNTTGVSAGCTADLLVGRAMTF	TPC-1 Cell Line (Thyroid Cance);Liver;OVCAR-3 cell line (Ovarian cancer);Liver;Ovarian tumor;OVCAR-3 cell line (Ovarian cancer);Breast cancer xenografts;Urine;Urine;Hela cell line (cervical cancer)	2009;2009;2013;2014;2015;2015;2015;2015;2015;2015;	62;64;34;33;Unpublished;1;Unpublished;Unpublished;Unpublished;12;Unpublished
Reviewed	O15230	LAMA5	Laminin subunit alpha-5	3107	VDLKRLnTTGVSAGCTADLL	VRGCVKGIKALGKYVDLKRLNTTGVSAGCTADLLVGRAMTF	Liver	2014	33
Reviewed	O15230	LAMA5	Laminin subunit alpha-5	3209	YSnATGVWLYVDDQLQQMKPHR	EVKTQAGFADGAPHYVAFYSNATGVWLYVDDQLQQMKPHRG	Ovarian tumor	2015	Unpublished
Reviewed	O15230	LAMA5	Laminin subunit alpha-5	3209	TQAGFADGAPHYVAFYSnATGVWLYVDDQLQQMK	EVKTQAGFADGAPHYVAFYSNATGVWLYVDDQLQQMKPHRG	Ovarian tumor	2015	Unpublished
Reviewed	O15230	LAMA5	Laminin subunit alpha-5	3209	TQAGFADGAPHYVAFYSnATGVWLYVDDQLQQMKPHR	EVKTQAGFADGAPHYVAFYSNATGVWLYVDDQLQQMKPHRG	Ovarian tumor;LNCap/PC3 cell lines (Prostate cancer)	2015;2015	Unpublished;2
Reviewed	O15230	LAMA5	Laminin subunit alpha-5	3257	nFSGCISNVF	QPEGPPRLLLGGLPESGTIYNFSGCISNVFVQRLLGPQRVF	Liver	2014	33
Reviewed	O15230	LAMA5	Laminin subunit alpha-5	3257	nFSGCISNVFVQR	QPEGPPRLLLGGLPESGTIYNFSGCISNVFVQRLLGPQRVF	OVCAR-3 cell line (Ovarian cancer)	2015	1
Reviewed	O15230	LAMA5	Laminin subunit alpha-5	3257	SGTIYnFSGCISNVFVQR	QPEGPPRLLLGGLPESGTIYNFSGCISNVFVQRLLGPQRVF	Liver	2014	33
Reviewed	O15230	LAMA5	Laminin subunit alpha-5	3257	LLLGGLPESGTIYnFSGCISNVFVQR	QPEGPPRLLLGGLPESGTIYNFSGCISNVFVQRLLGPQRVF	OVCAR-3 cell line (Ovarian cancer);Ovarian tumor;OVCAR-3 cell line (Ovarian cancer);LNCap/PC3 cell lines (Prostate cancer);Prostate tumor;Bladder tumor	2013;2015;2015;2015;2007;2007	34;1;2;Unpublished;Unpublished
Reviewed	O15230	LAMA5	Laminin subunit alpha-5	3287	QNIGSVnVSTGCA	VQRLLGPQRVFDLQQNLGSVNVSTGCAPALQAQTPGLGPRG	Breast Cancer cell lines	2013	37
Reviewed	O15230	LAMA5	Laminin subunit alpha-5	3287	GSVnVSTGCAPALQ	VQRLLGPQRVFDLQQNLGSVNVSTGCAPALQAQTPGLGPRG	Liver	2014	33
Reviewed	O15230	LAMA5	Laminin subunit alpha-5	3287	nVSTGCAPALQAQTPGLGPR	VQRLLGPQRVFDLQQNLGSVNVSTGCAPALQAQTPGLGPRG	OVCAR-3 cell line (Ovarian cancer)	2015	1
Reviewed	O15230	LAMA5	Laminin subunit alpha-5	3287	DLQQNLGSVnVSTGCAPALQAQTPGLGPR	VQRLLGPQRVFDLQQNLGSVNVSTGCAPALQAQTPGLGPRG	Liver	2014	33
Reviewed	O15230	LAMA5	Laminin subunit alpha-5	3287	DLQQNLGSVnVSTGCAPALQAQTPGLGPRG	VQRLLGPQRVFDLQQNLGSVNVSTGCAPALQAQTPGLGPRG	Liver	2014	33
Reviewed	O15230	LAMA5	Laminin subunit alpha-5	3287	VFDLQQNLGSVnVSTGCAPALQAQTPGLGPR	VQRLLGPQRVFDLQQNLGSVNVSTGCAPALQAQTPGLGPRG	Pancreatic islets; HCC cell lines (Liver);Non-small Cell Lung Carcinoma;Liver;Ovarian tumor;OVCAR-3 cell line (Ovarian cancer);Breast cancer xenografts;Hela cell line (cervical cancer)	2012;2013;2014;2014;2015;2015;2015;2015	48;40;18;33;Unpublished;1;Unpublished;12
Reviewed	O15230	LAMA5	Laminin subunit alpha-5	3626	VDAQSnHTVGPL	HRLAVMKSGNVLRLEVDAQSNHTVGPLLAAAAGAPAPLYLG	Liver	2014	33
Reviewed	O15230	LAMA5	Laminin subunit alpha-5	3626	RLEVDAQSnHTVGPL	HRLAVMKSGNVLRLEVDAQSNHTVGPLLAAAAGAPAPLYLG	Liver	2014	33
Reviewed	O15244	SLC22A2	Solute carrier family 22 member 2	97	RYEVDWnQS	GPGPAGEASPRQCRRYEVDWNQSTFDCVDPLASLDTNRSRL	Liver	2014	33
Reviewed	O15245	SLC22A1	Solute carrier family 22 member 1	71	LnYTVPGLGPAGE	QSPGVAELSQRCGWSPAEELNYTVPGLGPAGEAFLGQCRRY	Liver	2014	33
Reviewed	O15245	SLC22A1	Solute carrier family 22 member 1	71	LnYTVPGLGPAGEAF	QSPGVAELSQRCGWSPAEELNYTVPGLGPAGEAFLGQCRRY	Liver	2014	33
Reviewed	O15245	SLC22A1	Solute carrier family 22 member 1	71	SPAEELnYTVPGLGPAGEAF	QSPGVAELSQRCGWSPAEELNYTVPGLGPAGEAFLGQCRRY	Liver	2014	33
Reviewed	O15245	SLC22A1	Solute carrier family 22 member 1	71	CGWSPAEEInYTVPGIGPAGEAFIGQCR	QSPGVAELSQRCGWSPAEELNYTVPGLGPAGEAFLGQCRRY	Liver tumor (HCC);Liver	2014;2014	32;32
Reviewed	O15245	SLC22A1	Solute carrier family 22 member 1	71	CGWSPAEELnYTVPGLGPAGEAFLGQCR	QSPGVAELSQRCGWSPAEELNYTVPGLGPAGEAFLGQCRRY	Liver	2014	33
Reviewed	O15245	SLC22A1	Solute carrier family 22 member 1	96	EVDWnQSAL	GLGPAGEAFLGQCRRYEVDWNQSALSCVDPLASLATNRSHL	Liver	2014	33
Reviewed	O15245	SLC22A1	Solute carrier family 22 member 1	96	RYEVDWnQS	GLGPAGEAFLGQCRRYEVDWNQSALSCVDPLASLATNRSHL	Liver	2014	33
Reviewed	O15245	SLC22A1	Solute carrier family 22 member 1	96	YEVDWnQSAL	GLGPAGEAFLGQCRRYEVDWNQSALSCVDPLASLATNRSHL	Liver	2014	33
Reviewed	O15245	SLC22A1	Solute carrier family 22 member 1	96	RYEVDWnQSAL	GLGPAGEAFLGQCRRYEVDWNQSALSCVDPLASLATNRSHL	Liver	2014	33
Reviewed	O15245	SLC22A1	Solute carrier family 22 member 1	96	YEVDWnQSALS	GLGPAGEAFLGQCRRYEVDWNQSALSCVDPLASLATNRSHL	Liver	2014	33
Reviewed	O15245	SLC22A1	Solute carrier family 22 member 1	96	RYEVDWnQSALS	GLGPAGEAFLGQCRRYEVDWNQSALSCVDPLASLATNRSHL	Liver	2014	33
Reviewed	O15245	SLC22A1	Solute carrier family 22 member 1	96	RYEVDWnQSALSC	GLGPAGEAFLGQCRRYEVDWNQSALSCVDPLASLATNRSHL	Liver	2014	33
Reviewed	O15245	SLC22A1	Solute carrier family 22 member 1	96	VDWnQSALSCVDPLASLATNR	GLGPAGEAFLGQCRRYEVDWNQSALSCVDPLASLATNRSHL	Liver	2014	33
Reviewed	O15245	SLC22A1	Solute carrier family 22 member 1	96	YEVDWnQSAISCVDPIASIATNR	GLGPAGEAFLGQCRRYEVDWNQSALSCVDPLASLATNRSHL	Liver tumor (HCC);Liver	2014;2014	32;32
Reviewed	O15245	SLC22A1	Solute carrier family 22 member 1	96	YEVDWnQSALSCVDPLASLATNR	GLGPAGEAFLGQCRRYEVDWNQSALSCVDPLASLATNRSHL	Liver	2014	33
Reviewed	O15245	SLC22A1	Solute carrier family 22 member 1	96	RYEVDWnQSALSCVDPLASLATNR	GLGPAGEAFLGQCRRYEVDWNQSALSCVDPLASLATNRSHL	Liver	2014	33
Reviewed	O15245	SLC22A1	Solute carrier family 22 member 1	112	PLASLATnR	EVDWNQSALSCVDPLASLATNRSHLPLGPCQDGWVYDTPGS	Liver	2014	33
Reviewed	O15245	SLC22A1	Solute carrier family 22 member 1	112	VDPLASLATnR	EVDWNQSALSCVDPLASLATNRSHLPLGPCQDGWVYDTPGS	Liver	2014	33
Reviewed	O15245	SLC22A1	Solute carrier family 22 member 1	112	CVDPLASLATnR	EVDWNQSALSCVDPLASLATNRSHLPLGPCQDGWVYDTPGS	Liver	2014	33
Reviewed	O15245	SLC22A1	Solute carrier family 22 member 1	112	SCVDPLASLATnR	EVDWNQSALSCVDPLASLATNRSHLPLGPCQDGWVYDTPGS	Liver	2014	33
Reviewed	O15245	SLC22A1	Solute carrier family 22 member 1	112	ATnRSHLPLGPCQDGW	EVDWNQSALSCVDPLASLATNRSHLPLGPCQDGWVYDTPGS	Liver	2014	33
Reviewed	O15245	SLC22A1	Solute carrier family 22 member 1	112	VDWNQSALSCVDPLASLATnR	EVDWNQSALSCVDPLASLATNRSHLPLGPCQDGWVYDTPGS	Liver	2014	33
Reviewed	O15245	SLC22A1	Solute carrier family 22 member 1	112	YEVDWNQSAISCVDPIASIATnR	EVDWNQSALSCVDPLASLATNRSHLPLGPCQDGWVYDTPGS	Liver tumor (HCC);Liver	2014;2014	32;32
Reviewed	O15245	SLC22A1	Solute carrier family 22 member 1	112	YEVDWNQSALSCVDPLASLATnR	EVDWNQSALSCVDPLASLATNRSHLPLGPCQDGWVYDTPGS	Liver	2014	33
Reviewed	O15245	SLC22A1	Solute carrier family 22 member 1	112	RYEVDWNQSALSCVDPLASLATnR	EVDWNQSALSCVDPLASLATNRSHLPLGPCQDGWVYDTPGS	Liver	2014	33
Reviewed	O15247	CLIC2	Chloride intracellular channel protein 2	48	GVKFnVTTV	GNCPFCQRLFMILWLKGVKFNVTTVDMTRKPEELKDLAPGT	Urine;Urine;Prostate tumor	2007;2007;2007	Unpublished;Unpublished
Reviewed	O15265	ATXN7	Ataxin-7	847	CSPSSSSInNSSSKPTK	TPLDKLIGKKRKCSPSSSSINNSSSKPTKVAKVPAVNNVHM	Ovarian tumor	2015	Unpublished
Reviewed	O15265	ATXN7	Ataxin-7	848	CSPSSSSINnSSSKPTK	PLDKLIGKKRKCSPSSSSINNSSSKPTKVAKVPAVNNVHMK	Ovarian tumor	2015	Unpublished
Reviewed	O15266	SHOX	Short stature homeobox protein	123	SRTnF	DVKSEDEDGQTKLKQRRSRTNFTLEQLNELERLFDETHYPD	Liver	2014	33
Reviewed	O15296	ALOX15B	Arachidonate 15-lipoxygenase B	450	QLnYSLLCLPEDIR	STGIGIEGFSELIQRNMKQLNYSLLCLPEDIRTRGVEDIPG	Lung tumor	2012	49
Reviewed	O15297	PPM1D	Protein phosphatase 1D	502	SLPIGLVPTnSTNTVMDQK	LTLRIHDSLNNSLPIGLVPTNSTNTVMDQKNLKMSTPGQMK	Urine	2007	Unpublished
Reviewed	O15321	TM9SF1	Transmembrane 9 superfamily member 1	178	IIFAnVSVR	GLWTHLDFHLEFHGDRIIFANVSVRDVKPHSLDGLRPDEFL	Urine;prostate cancer cell lines;Pancreatic islets;22Rv1 cell xenograft (prostate cancer);Prostate;DLBCL cell lines (Diffuse large B-cell lymphoma);Liver;Ovarian tumor;OVCAR-3 cell line (Ovarian cancer);Platelet;LNCap/PC3 cell lines (Prostate cancer);Breast cancer xenografts;Urine;Prostate tumor	2007;2007;2012;2012;2014;2014;2014;2015;2015;2015;2015;2015;2007;2007	72;48;50;14;16;33;1;2;Unpublished;Unpublished
Reviewed	O15321	TM9SF1	Transmembrane 9 superfamily member 1	178	DRIIFAnVSVRDV	GLWTHLDFHLEFHGDRIIFANVSVRDVKPHSLDGLRPDEFL	Breast Cancer cell lines	2013	37
Reviewed	O15342	ATP6V0E1	V-type proton ATPase subunit e 1	70	nETIWYIK	LFWLIAILAQLNPLFGPQLKNETIWYLKYHWP---------	Spermatozoa;DLBCL cell lines (Diffuse large B-cell lymphoma)	2013;2014	43;16
Reviewed	O15342	ATP6V0E1	V-type proton ATPase subunit e 1	70	nETIWYLK	LFWLIAILAQLNPLFGPQLKNETIWYLKYHWP---------	Liver;Breast cancer xenografts	2014;2015	33;Unpublished
Reviewed	O15342	ATP6V0E1	V-type proton ATPase subunit e 1	70	GPQLKnETIW	LFWLIAILAQLNPLFGPQLKNETIWYLKYHWP---------	Liver	2014	33
Reviewed	O15342	ATP6V0E1	V-type proton ATPase subunit e 1	70	FGPQLKnETIW	LFWLIAILAQLNPLFGPQLKNETIWYLKYHWP---------	Liver	2014	33
Reviewed	O15344	MID1	E3 ubiquitin-protein ligase Midline-1	254	RNTELETLLAKLIQTCQHVEVnASR	NTELETLLAKLIQTCQHVEVNASRQEAKLTEECDLLIEIIQ	Serum;Prostate tumor	2007;2007	Unpublished;Unpublished
Reviewed	O15347	HMGB3	High mobility group protein B3	135	nDSEKQPYITK	NPGISIGDVAKKLGEMWNNLNDSEKQPYITKAAKLKEKYEK	OVCAR-3 cell line (Ovarian cancer)	2015	1
Reviewed	O15354	GPR37	Prosaposin receptor GPR37	36	nETCLGESCAPTVIQR	LLLLLKVSASSALGVAPASRNETCLGESCAPTVIQRRGRDA	Cerebrospinal fluid	2015	5
Reviewed	O15354	GPR37	Prosaposin receptor GPR37	36	LGVAPASRnETCLGESCAPTVIQR	LLLLLKVSASSALGVAPASRNETCLGESCAPTVIQRRGRDA	Prostate tumor;Cerebrospinal fluid	2007;2007	Unpublished;Unpublished
Reviewed	O15354	GPR37	Prosaposin receptor GPR37	222	ALAQnGSLGEGIHEPGGPR	NGLAGHEGWTIALPGRALAQNGSLGEGIHEPGGPRRGNSTN	Urine;Urine;Urine	2015;2015;2015;	Unpublished;Unpublished;Unpublished;Unpublished
Reviewed	O15357	INPPL1	Phosphatidylinositol 3,4,5-trisphosphate 5-phosphatase 2	551	nGTSFGFVNCHLTSGNEK	KTGIANTLGNKGAVGVSFMFNGTSFGFVNCHLTSGNEKTAR	OVCAR-3 cell line (Ovarian cancer)	2015	1
Reviewed	O15357	INPPL1	Phosphatidylinositol 3,4,5-trisphosphate 5-phosphatase 2	551	TGIANTLGNKGAVGVSFMFnGTSFGFVNCHLTSGNEKTAR	KTGIANTLGNKGAVGVSFMFNGTSFGFVNCHLTSGNEKTAR	LNCap/PC3 cell lines (Prostate cancer)	2015	2
Reviewed	O15371	EIF3D	Eukaryotic translation initiation factor 3 subunit D	322	nFSQQCLR	EGNSFNSPRNLAMEATYINHNFSQQCLRMGKERYNFPNPNP	OVCAR-3 cell line (Ovarian cancer)	2015	1
Reviewed	O15371	EIF3D	Eukaryotic translation initiation factor 3 subunit D	427	GAVIATELKnNSYKLAR	VDWRQKLDSQRGAVIATELKNNSYKLARWTCCALLAGSEYL	Colorectal tumors	2009	68
Reviewed	O15374	SLC16A4	Monocarboxylate transporter 5	204	SEnNSGIK	IALNLVPSSMLLRPIHIKSENNSGIKDKGSSLSAHGPEAHA	Prostate	2014	14
Reviewed	O15381	NVL	Nuclear valosin-containing protein-like	120	PDPQSANHMnSSLLSLYR	YSDDDSSMEDYPDPQSANHMNSSLLSLYRKGNPDSVSNTPE	Urine	2007	Unpublished
Reviewed	O15381	NVL	Nuclear valosin-containing protein-like	637	AVAnESGLNFISVK	GVLLAGPPGCGKTLLAKAVANESGLNFISVKGPELLNMYVG	Prostate tumor;Ovarian tumor	2007;2007	Unpublished;Unpublished
Reviewed	O15389	SIGLEC5	Sialic acid-binding Ig-like lectin 5	100	nCSISIGDAR	RRVKPETQGRFRLLGDVQKKNCSLSIGDARMEDTGSYFFRV	DLBCL cell lines (Diffuse large B-cell lymphoma)	2014	16
Reviewed	O15389	SIGLEC5	Sialic acid-binding Ig-like lectin 5	100	nCSLSIGDAR	RRVKPETQGRFRLLGDVQKKNCSLSIGDARMEDTGSYFFRV	Liver	2014	33
Reviewed	O15389	SIGLEC5	Sialic acid-binding Ig-like lectin 5	210	DHGTnLTCQMK	PETTRSSELTLTPRPEDHGTNLTCQMKRQGAQVTTERTVQL	Liver	2014	33
Reviewed	O15389	SIGLEC5	Sialic acid-binding Ig-like lectin 5	210	SSELTLTPRPEDHGTnLTCQMK	PETTRSSELTLTPRPEDHGTNLTCQMKRQGAQVTTERTVQL	Liver	2014	33
Reviewed	O15389	SIGLEC5	Sialic acid-binding Ig-like lectin 5	210	SSEITITPRPEDHGTnITCQMKR	PETTRSSELTLTPRPEDHGTNLTCQMKRQGAQVTTERTVQL	DLBCL cell lines (Diffuse large B-cell lymphoma)	2014	16
Reviewed	O15389	SIGLEC5	Sialic acid-binding Ig-like lectin 5	231	TVQInVSYAPQTITIFR	LTCQMKRQGAQVTTERTVQLNVSYAPQTITIFRNGIALEIL	DLBCL cell lines (Diffuse large B-cell lymphoma)	2014	16
Reviewed	O15389	SIGLEC5	Sialic acid-binding Ig-like lectin 5	253	NGIALEILQnTSYLPVLEGQALR	SYAPQTITIFRNGIALEILQNTSYLPVLEGQALRLLCDAPS	Liver	2014	33
Reviewed	O15389	SIGLEC5	Sialic acid-binding Ig-like lectin 5	375	IEEKPIEGnSSQGSFK	FRARPAPSLCWRLEEKPLEGNSSQGSFKVNSSSAGPWANSS	DLBCL cell lines (Diffuse large B-cell lymphoma)	2014	16
Reviewed	O15389	SIGLEC5	Sialic acid-binding Ig-like lectin 5	375	LEEKPLEGnSSQGSFK	FRARPAPSLCWRLEEKPLEGNSSQGSFKVNSSSAGPWANSS	Colorectal tumor;Liver	2014;2014	22;33
Reviewed	O15389	SIGLEC5	Sialic acid-binding Ig-like lectin 5	375	RLEEKPLEGnSSQGSF	FRARPAPSLCWRLEEKPLEGNSSQGSFKVNSSSAGPWANSS	Liver	2014	33
Reviewed	O15393	TMPRSS2	Transmembrane protease serine 2	213	LnTSAGNVD	NFYSSQGIVDDSGSTSFMKLNTSAGNVDIYKKLYHSDACSS	Prostate;Prostate tumor	2014;2015	14;Unpublished
Reviewed	O15393	TMPRSS2	Transmembrane protease serine 2	213	LnTSAGNVDIYK	NFYSSQGIVDDSGSTSFMKLNTSAGNVDIYKKLYHSDACSS	Urine;Pancreatic islets;Urine;Urine;Prostate;Colorectal tumor;Liver;LNCap/PC3 cell lines (Prostate cancer);Breast cancer xenografts;Prostate tumor;Urine;Urine;Urine;Urine;Prostate tumor	2007;2012;2012;2013;2014;2014;2014;2015;2015;2015;2015;2015;2015;2007;2007	48;51;45;14;22;33;2;Unpublished;Unpublished
Reviewed	O15393	TMPRSS2	Transmembrane protease serine 2	213	LnTSAGNVDIYKK	NFYSSQGIVDDSGSTSFMKLNTSAGNVDIYKKLYHSDACSS	Pancreatic islets;Prostate;Liver;LNCap/PC3 cell lines (Prostate cancer);Prostate tumor;Urine;Urine;Urine	2012;2014;2014;2015;2015;2015;2015;2015;	48;14;33;2;Unpublished;Unpublished;Unpublished;Unpublished;Unpublished
Reviewed	O15393	TMPRSS2	Transmembrane protease serine 2	213	TSFMKInTSAGNV	NFYSSQGIVDDSGSTSFMKLNTSAGNVDIYKKLYHSDACSS	Breast Cancer cell lines	2013	37
Reviewed	O15393	TMPRSS2	Transmembrane protease serine 2	249	CIACGVNLnSSR	DACSSKAVVSLRCIACGVNLNSSRQSRIVGGESALPGAWPW	Urine;Urine;Breast cancer xenografts;Prostate tumor;Urine;Urine;Urine;Urine;Prostate tumor	2007;2013;2015;2015;2015;2015;2015;2007;2007	45;Unpublished;Unpublished
Reviewed	O15393	TMPRSS2	Transmembrane protease serine 2	249	ACGVNInSSRQSR	DACSSKAVVSLRCIACGVNLNSSRQSRIVGGESALPGAWPW	Breast Cancer cell lines	2013	37
Reviewed	O15394	NCAM2	Neural cell adhesion molecule 2	177	ANNNLQILNInK	TISDNRFAMLANNNLQILNINKSDEGIYRCEGRVEARGEID	Urine;Urine;Prostate tumor	2007;2007;2007	Unpublished;Unpublished
Reviewed	O15394	NCAM2	Neural cell adhesion molecule 2	177	IQIINInKSDEGI	TISDNRFAMLANNNLQILNINKSDEGIYRCEGRVEARGEID	Breast Cancer cell lines	2013	37
Reviewed	O15394	NCAM2	Neural cell adhesion molecule 2	177	FAMLANNNLQILNInK	TISDNRFAMLANNNLQILNINKSDEGIYRCEGRVEARGEID	Breast cell lines;Urine;Liver;LNCap/PC3 cell lines (Prostate cancer);Urine;Urine;Urine;Prostate tumor;Cerebrospinal fluid	2012;2013;2014;2015;2015;2015;2015;2007;2007	52;45;33;2;Unpublished;Unpublished
Reviewed	O15394	NCAM2	Neural cell adhesion molecule 2	177	FAMIANNNIQIINInKSDEGIYR	TISDNRFAMLANNNLQILNINKSDEGIYRCEGRVEARGEID	DLBCL cell lines (Diffuse large B-cell lymphoma)	2014	16
Reviewed	O15394	NCAM2	Neural cell adhesion molecule 2	177	FAMLANNNLQILNInKSDEGIYR	TISDNRFAMLANNNLQILNINKSDEGIYRCEGRVEARGEID	Breast cell lines	2012	52
Reviewed	O15394	NCAM2	Neural cell adhesion molecule 2	177	VSSSPAPAVSWLYHNEEVTTISDNRFAMLANNNLQILNInK	TISDNRFAMLANNNLQILNINKSDEGIYRCEGRVEARGEID	Breast cell lines	2012	52
Reviewed	O15394	NCAM2	Neural cell adhesion molecule 2	219	SFnATAER	RDIIVIVNVPPAISMPQKSFNATAERGEEMTFSCRASGSPE	22Rv1 cell line (prostate cancer);Breast cell lines;Prostate;Colorectal tumor;Liver;LNCap/PC3 cell lines (Prostate cancer);Serum	2012;2012;2014;2014;2014;2015;2015	50;52;14;22;33;2;10
Reviewed	O15394	NCAM2	Neural cell adhesion molecule 2	219	MPQKSFnATAERG	RDIIVIVNVPPAISMPQKSFNATAERGEEMTFSCRASGSPE	Breast Cancer cell lines	2013	37
Reviewed	O15394	NCAM2	Neural cell adhesion molecule 2	219	SFnATAERGEEMTFSCR	RDIIVIVNVPPAISMPQKSFNATAERGEEMTFSCRASGSPE	Breast cell lines;DLBCL cell lines (Diffuse large B-cell lymphoma)	2012;2014	52;16
Reviewed	O15394	NCAM2	Neural cell adhesion molecule 2	309	nETTYENGQVTLVCDAEGEPIPEITWK	EDEKQAFLQVFVQPHIIQLKNETTYENGQVTLVCDAEGEPI	LNCap/PC3 cell lines (Prostate cancer)	2015	2
Reviewed	O15394	NCAM2	Neural cell adhesion molecule 2	406	FISnQTIYYSWE	IGGHQKSMYLDIEYAPKFISNQTIYYSWEGNPINISCDVKS	Liver	2014	33
Reviewed	O15394	NCAM2	Neural cell adhesion molecule 2	406	FISnQTIYYSWEGNPINISCDVK	IGGHQKSMYLDIEYAPKFISNQTIYYSWEGNPINISCDVKS	22Rv1 cell line (prostate cancer);Breast cell lines;LNCap/PC3 cell lines (Prostate cancer)	2012;2012;2015	50;52;2
Reviewed	O15394	NCAM2	Neural cell adhesion molecule 2	419	GNPInISCDVK	YAPKFISNQTIYYSWEGNPINISCDVKSNPPASIHWRRDKL	Liver	2014	33
Reviewed	O15394	NCAM2	Neural cell adhesion molecule 2	419	SWEGNPInISCDVK	YAPKFISNQTIYYSWEGNPINISCDVKSNPPASIHWRRDKL	Liver	2014	33
Reviewed	O15394	NCAM2	Neural cell adhesion molecule 2	419	FISNQTIYYSWEGNPInISCDVK	YAPKFISNQTIYYSWEGNPINISCDVKSNPPASIHWRRDKL	22Rv1 cell line (prostate cancer);Breast cell lines;LNCap/PC3 cell lines (Prostate cancer)	2012;2012;2015	50;52;2
Reviewed	O15394	NCAM2	Neural cell adhesion molecule 2	445	nTTNLK	KSNPPASIHWRRDKLVLPAKNTTNLKTYSTGRKMILEIAPT	LNCap/PC3 cell lines (Prostate cancer);Serum	2015;2015	2;10
Reviewed	O15394	NCAM2	Neural cell adhesion molecule 2	445	LVLPAKnTTNLK	KSNPPASIHWRRDKLVLPAKNTTNLKTYSTGRKMILEIAPT	LnCap cell line (Prostate cancer);LNCap/PC3 cell lines (Prostate cancer);Prostate tumor;Prostate cancer cell lines;Cerebrospinal fluid	2003;2015;2007;2007;2007	83;2;Unpublished;Unpublished;Unpublished
Reviewed	O15394	NCAM2	Neural cell adhesion molecule 2	445	IVIPAKnTTNIKT	KSNPPASIHWRRDKLVLPAKNTTNLKTYSTGRKMILEIAPT	Breast Cancer cell lines	2013	37
Reviewed	O15394	NCAM2	Neural cell adhesion molecule 2	445	DKIVIPAKnTTNIK	KSNPPASIHWRRDKLVLPAKNTTNLKTYSTGRKMILEIAPT	DLBCL cell lines (Diffuse large B-cell lymphoma)	2014	16
Reviewed	O15394	NCAM2	Neural cell adhesion molecule 2	445	DKLVLPAKnTTNLK	KSNPPASIHWRRDKLVLPAKNTTNLKTYSTGRKMILEIAPT	Breast cell lines;Liver;OVCAR-3 cell line (Ovarian cancer);LNCap/PC3 cell lines (Prostate cancer)	2012;2014;2015;2015	52;33;1;2
Reviewed	O15394	NCAM2	Neural cell adhesion molecule 2	474	YnCTATNHIGTR	TGRKMILEIAPTSDNDFGRYNCTATNHIGTRFQEYILALAD	22Rv1 cell line (prostate cancer);Breast cell lines;Serum;plasma;Prostate;DLBCL cell lines (Diffuse large B-cell lymphoma);Liver;LNCap/PC3 cell lines (Prostate cancer);Urine;Serum;Urine;Prostate tumor	2012;2012;2013;2013;2014;2014;2014;2015;2015;2015;2015;2007	50;52;42;45;14;16;33;2;Unpublished
Reviewed	O15394	NCAM2	Neural cell adhesion molecule 2	474	NDFGRYnCTATNH	TGRKMILEIAPTSDNDFGRYNCTATNHIGTRFQEYILALAD	Breast Cancer cell lines	2013	37
Reviewed	O15394	NCAM2	Neural cell adhesion molecule 2	474	MIIEIAPTSDNDFGRYnCTATNHIGTR	TGRKMILEIAPTSDNDFGRYNCTATNHIGTRFQEYILALAD	DLBCL cell lines (Diffuse large B-cell lymphoma)	2014	16
Reviewed	O15394	NCAM2	Neural cell adhesion molecule 2	474	MILEIAPTSDNDFGRYnCTATNHIGTR	TGRKMILEIAPTSDNDFGRYNCTATNHIGTRFQEYILALAD	Breast cell lines	2012	52
Reviewed	O15394	NCAM2	Neural cell adhesion molecule 2	562	SHGVQTMVVINNIEPnTTYEIR	WKIVRSHGVQTMVVLNNLEPNTTYEIRVAAVNGKGQGDYSK	DLBCL cell lines (Diffuse large B-cell lymphoma)	2014	16
Reviewed	O15394	NCAM2	Neural cell adhesion molecule 2	562	SHGVQTMVVLNNLEPnTTYEIR	WKIVRSHGVQTMVVLNNLEPNTTYEIRVAAVNGKGQGDYSK	LnCap cell line (Prostate cancer);Breast cell lines;LNCap/PC3 cell lines (Prostate cancer);Serum;Prostate tumor;Cerebrospinal fluid	2003;2012;2015;2015;2007;2007	83;52;2;10;Unpublished;Unpublished
Reviewed	O15399	GRIN2D	Glutamate receptor ionotropic, NMDA 2D	92	SPGIDVRPVAIVInGSDPR	AVAAAVRSPGLDVRPVALVLNGSDPRSLVLQLCDLLSGLRV	DLBCL cell lines (Diffuse large B-cell lymphoma)	2014	16
Reviewed	O15399	GRIN2D	Glutamate receptor ionotropic, NMDA 2D	715	FGTVPnGSTEK	DRKFQRPQEQYPPLKFGTVPNGSTEKNIRSNYPDMHSYMVR	Prostate	2014	14
Reviewed	O15405	TOX3	TOX high mobility group box family member 3	178	SGVMPPAQLTTInQSQLSAQLGLNLG	VHMTDAARSGVMPPAQLTTINQSQLSAQLGLNLGGASMPHT	Urine;Urine;Prostate tumor	2007;2007;2007	Unpublished;Unpublished
Reviewed	O15439	ABCC4	Multidrug resistance-associated protein 4	746	QSMLnVTVNGGGNVTEK	VAYVLQDWWLSYWANKQSMLNVTVNGGGNVTEKLDLNWYLG	22Rv1 cell line (prostate cancer);Prostate tumor;Ovarian tumor	2012;2007;2007	50;Unpublished;Unpublished
Reviewed	O15439	ABCC4	Multidrug resistance-associated protein 4	754	QSMLNVTVNGGGnVTEK	WLSYWANKQSMLNVTVNGGGNVTEKLDLNWYLGIYSGLTVA	22Rv1 cell line (prostate cancer);Prostate tumor;Ovarian tumor	2012;2007;2007	50;Unpublished;Unpublished
Reviewed	O15440	ABCC5	Multidrug resistance-associated protein 5	890	QGSGnTTVTR	VGSTAFSTWWLSYWIKQGSGNTTVTRGNETSVSDSMKDNPH	DLBCL cell lines (Diffuse large B-cell lymphoma)	2014	16
Reviewed	O15440	ABCC5	Multidrug resistance-associated protein 5	897	GnETSVSDSMK	TWWLSYWIKQGSGNTTVTRGNETSVSDSMKDNPHMQYYASI	DLBCL cell lines (Diffuse large B-cell lymphoma)	2014	16
Reviewed	O15444	CCL25	C-C motif chemokine 25	139	RnVSLLISANSGL	SGNSKLSSSKFSNPISSSKRNVSLLISANSGL---------	Urine;Urine;Urine	2015;2015;2015;	Unpublished;Unpublished;Unpublished;Unpublished
Reviewed	O15455	TLR3	Toll-like receptor 3	52	PTnITVLNLTHNQL	HEVADCSHLKLTQVPDDLPTNITVLNLTHNQLRRLPAANFT	Liver	2009	64
Reviewed	O15455	TLR3	Toll-like receptor 3	52	LTQVPDDLPTnITVL	HEVADCSHLKLTQVPDDLPTNITVLNLTHNQLRRLPAANFT	Liver	2014	33
Reviewed	O15455	TLR3	Toll-like receptor 3	52	KLTQVPDDLPTnITVL	HEVADCSHLKLTQVPDDLPTNITVLNLTHNQLRRLPAANFT	Liver	2014	33
Reviewed	O15455	TLR3	Toll-like receptor 3	52	ITQVPDDIPTnITVINITHNQIR	HEVADCSHLKLTQVPDDLPTNITVLNLTHNQLRRLPAANFT	Liver tumor (HCC);Liver	2014;2014	32;32
Reviewed	O15455	TLR3	Toll-like receptor 3	52	LTQVPDDLPTnITVLNLTHNQLR	HEVADCSHLKLTQVPDDLPTNITVLNLTHNQLRRLPAANFT	Urine;Colorectal tumors;Pancreatic islets;Prostate;Liver;Ovarian tumor;OVCAR-3 cell line (Ovarian cancer);Prostate tumor;Hela cell line (cervical cancer);Urine;Prostate tumor	2007;2009;2012;2014;2014;2015;2015;2015;2015;2007;2007	68;48;14;33;1;12;Unpublished;Unpublished
Reviewed	O15455	TLR3	Toll-like receptor 3	57	nLTHNQLR	CSHLKLTQVPDDLPTNITVLNLTHNQLRRLPAANFTRYSQL	OVCAR-3 cell line (Ovarian cancer)	2015	1
Reviewed	O15455	TLR3	Toll-like receptor 3	57	PTNITVLnLTHNQL	CSHLKLTQVPDDLPTNITVLNLTHNQLRRLPAANFTRYSQL	Liver	2009	64
Reviewed	O15455	TLR3	Toll-like receptor 3	57	ITQVPDDIPTNITVInITHNQIR	CSHLKLTQVPDDLPTNITVLNLTHNQLRRLPAANFTRYSQL	Liver tumor (HCC);Liver	2014;2014	32;32
Reviewed	O15455	TLR3	Toll-like receptor 3	57	LTQVPDDLPTNITVLnLTHNQLR	CSHLKLTQVPDDLPTNITVLNLTHNQLRRLPAANFTRYSQL	Urine;Colorectal tumors;Pancreatic islets;Prostate;Liver;Ovarian tumor;OVCAR-3 cell line (Ovarian cancer);Prostate tumor;Hela cell line (cervical cancer);Urine;Prostate tumor	2007;2009;2012;2014;2014;2015;2015;2015;2015;2007;2007	68;48;14;33;1;12;Unpublished;Unpublished
Reviewed	O15455	TLR3	Toll-like receptor 3	70	RLPAAnF	PTNITVLNLTHNQLRRLPAANFTRYSQLTSLDVGFNTISKL	Liver	2014	33
Reviewed	O15455	TLR3	Toll-like receptor 3	70	LPAAnFTR	PTNITVLNLTHNQLRRLPAANFTRYSQLTSLDVGFNTISKL	Colorectal tumor;Liver;Ovarian tumor	2014;2014;2015	22;33;Unpublished
Reviewed	O15455	TLR3	Toll-like receptor 3	70	RIPAAnFTR	PTNITVLNLTHNQLRRLPAANFTRYSQLTSLDVGFNTISKL	Liver tumor (HCC);Liver	2014;2014	32;32
Reviewed	O15455	TLR3	Toll-like receptor 3	70	RLPAAnFTR	PTNITVLNLTHNQLRRLPAANFTRYSQLTSLDVGFNTISKL	Urine;IGROV-1/CP cell line (Ovarian cancer)IGROV-1/CP;Pancreatic islets;Ovarian tumorJurkat T cell line;Prostate;Liver;Ovarian tumor;OVCAR-3 cell line (Ovarian cancer);LNCap/PC3 cell lines (Prostate cancer);Breast cancer xenografts;Prostate tumor;Urine;Prostate tumor	2007;2007;2012;2013;2014;2014;2014;2015;2015;2015;2015;2015;2007;2007	75;48;34;13;14;33;1;2;Unpublished;Unpublished
Reviewed	O15455	TLR3	Toll-like receptor 3	124	TFAFCTnLTE	LNLQHNELSQLSDKTFAFCTNLTELHLMSNSIQKIKNNPFV	Liver	2014	33
Reviewed	O15455	TLR3	Toll-like receptor 3	124	TFAFCTnLTELHLMSNSIQK	LNLQHNELSQLSDKTFAFCTNLTELHLMSNSIQKIKNNPFV	Liver	2014	33
Reviewed	O15455	TLR3	Toll-like receptor 3	196	LDIFAnSSLK	LLLSNNKIQALKSEELDIFANSSLKKLELSSNQIKEFSPGC	Liver	2014	33
Reviewed	O15455	TLR3	Toll-like receptor 3	196	SEELDIFAnSSLK	LLLSNNKIQALKSEELDIFANSSLKKLELSSNQIKEFSPGC	Breast cell lines;Liver;Ovarian tumor;OVCAR-3 cell line (Ovarian cancer);LNCap/PC3 cell lines (Prostate cancer);Breast cancer xenografts;Urine;Urine;Urine	2012;2014;2015;2015;2015;2015;2015;2015;2015;	52;33;Unpublished;1;2;Unpublished;Unpublished;Unpublished;Unpublished;Unpublished
Reviewed	O15455	TLR3	Toll-like receptor 3	196	SEELDIFAnSSLKKLELSSNQIK	LLLSNNKIQALKSEELDIFANSSLKKLELSSNQIKEFSPGC	Colorectal tumors	2009	68
Reviewed	O15455	TLR3	Toll-like receptor 3	247	LAnTSIR	FLNNVQLGPSLTEKLCLELANTSIRNLSLSNSQLSTTSNTT	Liver	2014	33
Reviewed	O15455	TLR3	Toll-like receptor 3	247	ICIEIAnTSIR	FLNNVQLGPSLTEKLCLELANTSIRNLSLSNSQLSTTSNTT	DLBCL cell lines (Diffuse large B-cell lymphoma)	2014	16
Reviewed	O15455	TLR3	Toll-like receptor 3	247	LCLELAnTSIR	FLNNVQLGPSLTEKLCLELANTSIRNLSLSNSQLSTTSNTT	Pancreatic islets;Colorectal tumor;Liver;OVCAR-3 cell line (Ovarian cancer);Breast cancer xenografts	2012;2014;2014;2015;2015	48;22;33;1;Unpublished
Reviewed	O15455	TLR3	Toll-like receptor 3	252	nLSLSNSQLSTTSNTTFLGLK	QLGPSLTEKLCLELANTSIRNLSLSNSQLSTTSNTTFLGLK	Breast cell lines;Ovarian tumor	2012;2015	52;Unpublished
Reviewed	O15455	TLR3	Toll-like receptor 3	265	nTTFLGLK	LANTSIRNLSLSNSQLSTTSNTTFLGLKWTNLTMLDLSYNN	OVCAR-3 cell line (Ovarian cancer)	2015	1
Reviewed	O15455	TLR3	Toll-like receptor 3	265	NLSLSNSQLSTTSnTTFLGLK	LANTSIRNLSLSNSQLSTTSNTTFLGLKWTNLTMLDLSYNN	Breast cell lines;Ovarian tumor	2012;2015	52;Unpublished
Reviewed	O15455	TLR3	Toll-like receptor 3	275	KWTnLTML	LSNSQLSTTSNTTFLGLKWTNLTMLDLSYNNLNVVGNDSFA	Liver	2014	33
Reviewed	O15455	TLR3	Toll-like receptor 3	275	GLKWTnLTML	LSNSQLSTTSNTTFLGLKWTNLTMLDLSYNNLNVVGNDSFA	Liver	2014	33
Reviewed	O15455	TLR3	Toll-like receptor 3	398	TLTnETFVSLAHSPLHILNLTK	LINLKYLSLSNSFTSLRTLTNETFVSLAHSPLHILNLTKNK	Liver;Ovarian tumor	2014;2015	33;Unpublished
Reviewed	O15455	TLR3	Toll-like receptor 3	413	HILnLTK	LRTLTNETFVSLAHSPLHILNLTKNKISKIESDAFSWLGHL	Liver	2014	33
Reviewed	O15455	TLR3	Toll-like receptor 3	413	TFVSLAHSPLHILnLTK	LRTLTNETFVSLAHSPLHILNLTKNKISKIESDAFSWLGHL	Liver	2014	33
Reviewed	O15455	TLR3	Toll-like receptor 3	413	TLTNETFVSLAHSPLHILnLTK	LRTLTNETFVSLAHSPLHILNLTKNKISKIESDAFSWLGHL	Liver;Ovarian tumor	2014;2015	33;Unpublished
Reviewed	O15455	TLR3	Toll-like receptor 3	636	nLTELDMR	NLQKNLITSVEKKVFGPAFRNLTELDMRFNPFDCTCESIAW	Liver;Ovarian tumor	2014;2015	33;Unpublished
Reviewed	O15455	TLR3	Toll-like receptor 3	636	GPAFRnLTEL	NLQKNLITSVEKKVFGPAFRNLTELDMRFNPFDCTCESIAW	Liver	2014	33
Reviewed	O15455	TLR3	Toll-like receptor 3	662	FVNWInETHTNIPELSSHY	MRFNPFDCTCESIAWFVNWINETHTNIPELSSHYLCNTPPH	Liver	2014	33
Reviewed	O15457	MSH4	MutS protein homolog 4	246	YFnETK	TLITENFKNVNFTTIQRKYFNETKGLEYIEQLCIAEFSTVL	Prostate	2014	14
Reviewed	O15457	MSH4	MutS protein homolog 4	332	NnHTLFGVLNYTK	IDSSSAQNLELLINNQDYRNNHTLFGVLNYTKTPGGSRRLR	Prostate	2014	14
Reviewed	O15457	MSH4	MutS protein homolog 4	340	LnYTK	LELLINNQDYRNNHTLFGVLNYTKTPGGSRRLRSNILEPLV	HCC cell lines (Liver)	2013	40
Reviewed	O15457	MSH4	MutS protein homolog 4	340	NNHTLFGVLnYTK	LELLINNQDYRNNHTLFGVLNYTKTPGGSRRLRSNILEPLV	Prostate	2014	14
Reviewed	O15457	MSH4	MutS protein homolog 4	665	ISAEKPIAnNTYVTEGSNFLIITGPNMSGK	AIKQGWHPILEKISAEKPIANNTYVTEGSNFLIITGPNMSG	Serum	2015	Unpublished
Reviewed	O15457	MSH4	MutS protein homolog 4	682	ISAEKPIANNTYVTEGSNFLIITGPnMSGK	PIANNTYVTEGSNFLIITGPNMSGKSTYLKQIALCQIMAQI	Serum	2015	Unpublished
Reviewed	O15460	P4HA2	Prolyl 4-hydroxylase subunit alpha-2	115	IAnLSVQR	TDWPALEDLVLQDSAAGFIANLSVQRQFFPTDEDEIGAAKA	Ovarian tumor	2015	Unpublished
Reviewed	O15460	P4HA2	Prolyl 4-hydroxylase subunit alpha-2	115	VLQDSAAGFIAnLSVQR	TDWPALEDLVLQDSAAGFIANLSVQRQFFPTDEDEIGAAKA	Prostate tumor;Breast tumor;Breast cancer cell lines	2007;2007;2007	Unpublished;Unpublished;Unpublished
Reviewed	O15460	P4HA2	Prolyl 4-hydroxylase subunit alpha-2	115	DLVLQDSAAGFIAnLSVQR	TDWPALEDLVLQDSAAGFIANLSVQRQFFPTDEDEIGAAKA	Liver	2014	33
Reviewed	O15460	P4HA2	Prolyl 4-hydroxylase subunit alpha-2	115	IAnLSVQRQFFPTDEDEIGAAKAL	TDWPALEDLVLQDSAAGFIANLSVQRQFFPTDEDEIGAAKA	Liver	2014	33
Reviewed	O15460	P4HA2	Prolyl 4-hydroxylase subunit alpha-2	115	LNTDWPALEDLVLQDSAAGFIAnLSVQR	TDWPALEDLVLQDSAAGFIANLSVQRQFFPTDEDEIGAAKA	LNCap/PC3 cell lines (Prostate cancer)	2015	2
Reviewed	O15460	P4HA2	Prolyl 4-hydroxylase subunit alpha-2	115	RLNTDWPALEDLVLQDSAAGFIAnLSVQR	TDWPALEDLVLQDSAAGFIANLSVQRQFFPTDEDEIGAAKA	LNCap/PC3 cell lines (Prostate cancer);Hela cell line (cervical cancer)	2015;2015	2;12
Reviewed	O15460	P4HA2	Prolyl 4-hydroxylase subunit alpha-2	264	TLTnQTEAELATPEGIYER	GGNLRYFEQLLEEEREKTLTNQTEAELATPEGIYERPVDYL	Ovarian tumor	2015	Unpublished
Reviewed	O15460	P4HA2	Prolyl 4-hydroxylase subunit alpha-2	264	TITnQTEAEIATPEGIYERPVDYIPER	GGNLRYFEQLLEEEREKTLTNQTEAELATPEGIYERPVDYL	Liver tumor (HCC)	2014	32
Reviewed	O15460	P4HA2	Prolyl 4-hydroxylase subunit alpha-2	264	TLTnQTEAELATPEGIYERPVDYLPER	GGNLRYFEQLLEEEREKTLTNQTEAELATPEGIYERPVDYL	Breast cell lines;OVCAR-3 cell line (Ovarian cancer);SKOV-3 cell line (Ovarian cancer);Ovarian tumor;K562A cell line (Leukemia);Liver;Ovarian tumor;OVCAR-3 cell line (Ovarian cancer);LNCap/PC3 cell lines (Prostate cancer);Breast cancer xenografts;Hela cell line (cervical cancer)	2012;2013;2013;2013;2014;2014;2015;2015;2015;2015;2015	52;34;34;34;25;33;Unpublished;1;2;Unpublished;12
Reviewed	O15460	P4HA2	Prolyl 4-hydroxylase subunit alpha-2	264	TITnQTEAEIATPEGIYERPVDYIPERDVYESICR	GGNLRYFEQLLEEEREKTLTNQTEAELATPEGIYERPVDYL	DLBCL cell lines (Diffuse large B-cell lymphoma)	2014	16
Reviewed	O15460	P4HA2	Prolyl 4-hydroxylase subunit alpha-2	264	TLTnQTEAELATPEGIYERPVDYLPERDVYESLCR	GGNLRYFEQLLEEEREKTLTNQTEAELATPEGIYERPVDYL	SKOV-3 cell line (Ovarian cancer);OVCAR-3 cell line (Ovarian cancer);Hela cell line (cervical cancer)	2013;2015;2015	34;1;12
Reviewed	O15466	ST8SIA5	Alpha-2,8-sialyltransferase 8E	284	LVnVSR	VLDDFESPQAVYYFHPQYLVNVSRYWLSLGVRAKRISTGLI	Breast cancer xenografts	2015	Unpublished
Reviewed	O15514	POLR2D	DNA-directed RNA polymerase II subunit RPB4	48	QQnESAEDEQELSEVF	TAETLLNSEVHMLLEHRKQQNESAEDEQELSEVFMKTLNYT	Urine	2007	Unpublished
Reviewed	O15514	POLR2D	DNA-directed RNA polymerase II subunit RPB4	48	QQnESAEDEQELSEVFMK	TAETLLNSEVHMLLEHRKQQNESAEDEQELSEVFMKTLNYT	Prostate tumor;Ovarian tumor	2007;2007	Unpublished;Unpublished
Reviewed	O15520	FGF10	Fibroblast growth factor 10	51	LGQDMVSPEATnSSSSSFSSPSSAGR	SSVPVTCQALGQDMVSPEATNSSSSSFSSPSSAGRHVRSYN	Urine;Urine;Prostate tumor	2007;2007;2007	Unpublished;Unpublished
Reviewed	O15523	DDX3Y	ATP-dependent RNA helicase DDX3Y	412	VGSTSEnITQK	RDFLDEYIFLAVGRVGSTSENITQKVVWVEDLDKRSFLLDI	Urine;Urine	2015;2015;	Unpublished;Unpublished;Unpublished
Reviewed	O15525	MAFG	Transcription factor MafG	20	nGTSLTDEELVTMSVR	-MTTPNKGNKALKVKREPGENGTSLTDEELVTMSVRELNQH	Urine	2007	Unpublished
Reviewed	O15533	TAPBP	Tapasin	253	TGnGTFWLPR	EGAVAFAAWDDDEPWGPWTGNGTFWLPRVQPFQEGTYLATI	Liver	2014	33
Reviewed	O15533	TAPBP	Tapasin	253	TGnGTFWLPRVQPF	EGAVAFAAWDDDEPWGPWTGNGTFWLPRVQPFQEGTYLATI	Liver	2014	33
Reviewed	O15533	TAPBP	Tapasin	253	AWDDDEPWGPWTGnGT	EGAVAFAAWDDDEPWGPWTGNGTFWLPRVQPFQEGTYLATI	Liver	2009	64
Reviewed	O15533	TAPBP	Tapasin	253	AAWDDDEPWGPWTGnGTFWLPR	EGAVAFAAWDDDEPWGPWTGNGTFWLPRVQPFQEGTYLATI	Prostate tumor;Breast tumor;Breast cancer cell lines	2007;2007;2007	Unpublished;Unpublished;Unpublished
Reviewed	O15540	FABP7	Fatty acid-binding protein, brain	35	QVGnVTKPTVIISQEG	QNFDEYMKALGVGFATRQVGNVTKPTVIISQEGDKVVIRTL	Urine;Urine;Prostate tumor	2007;2007;2007	Unpublished;Unpublished
Reviewed	O15550	KDM6A	Lysine-specific demethylase 6A	1346	VFDLLFVTnE	EPAHYCSICEVEVFDLLFVTNESNSRKTYIVHCQDCARKTS	Liver	2014	33
Reviewed	O15553	MEFV	Pyrin	206	nASSAGR	RSPGPCRALEGGQAEVRLRRNASSAGRLQGLAGGAPGQKEC	Urine;Urine;Prostate tumor	2007;2007;2007	Unpublished;Unpublished
Reviewed	O15554	KCNN4	Intermediate conductance calcium-activated potassium channel protein 4	384	LREQVNSMVDISKMHMILYDLQQnLSSSHR	QVNSMVDISKMHMILYDLQQNLSSSHRALEKQIDTLAGKLD	Serum;Prostate tumor	2007;2007	Unpublished;Unpublished
Reviewed	O43147	SGSM2	Small G protein signaling modulator 2	151	VVQYLAEnCSK	WVRTALIEKVLDKVVQYLAENCSKYYEKEALLADPVFGPIL	Prostate tumor;Breast tumor	2007;2007	Unpublished;Unpublished
Reviewed	O43149	ZZEF1	Zinc finger ZZ-type and EF-hand domain-containing protein 1	324	nASDLQEVR	AVAATDQSYMPQQVTVAVGRNASDLQEVRDVHIPSNVTGYV	Prostate	2014	14
Reviewed	O43155	FLRT2	Leucine-rich repeat transmembrane protein FLRT2	202	IAVISDMAFQnLTSLER	LQELRVDENRIAVISDMAFQNLTSLERLIVDGNLLTNKGIA	Urine;Liver;Pancreatic islets; HCC cell lines (Liver);Liver;Urine;Urine;Urine;Prostate tumor	2007;2009;2012;2013;2014;2015;2015;2007;2007	64;48;40;33;Unpublished;Unpublished
Reviewed	O43156	TTI1	TELO2-interacting protein 1 homolog	457	WNSDDLnASPKTSATQPWNR	ELDVADIKIVEERRWNSDDLNASPKTSATQPWNRIQRRYFR	Urine	2007	Unpublished
Reviewed	O43157	PLXNB1	Plexin-B1	31	nGTYLQHLAR	ALWAGWVLTLQPLPPTAFTPNGTYLQHLARDPTSGTLYLGA	OVCAR-3 cell line (Ovarian cancer)	2015	1
Reviewed	O43157	PLXNB1	Plexin-B1	31	LQPLPPTAFTPnGTYLQHLAR	ALWAGWVLTLQPLPPTAFTPNGTYLQHLARDPTSGTLYLGA	Liver;Ovarian tumor	2014;2015	33;Unpublished
Reviewed	O43157	PLXNB1	Plexin-B1	543	VAAMSPAnISR	WLWSFQPELGCLQVAAMSPANISREETREVFLSVPDLPPLW	Liver	2014	33
Reviewed	O43157	PLXNB1	Plexin-B1	543	LGCLQVAAMSPAnISR	WLWSFQPELGCLQVAAMSPANISREETREVFLSVPDLPPLW	Liver	2014	33
Reviewed	O43157	PLXNB1	Plexin-B1	543	SFQPELGCLQVAAMSPAnISR	WLWSFQPELGCLQVAAMSPANISREETREVFLSVPDLPPLW	Liver	2014	33
Reviewed	O43157	PLXNB1	Plexin-B1	1183	LTLnGSK	KVHSIFPARGPRAGGTRLTLNGSKLLTGRLEDIRVVVGDQP	Colorectal tumor;Liver;OVCAR-3 cell line (Ovarian cancer);LNCap/PC3 cell lines (Prostate cancer);Breast cancer xenografts;Hela cell line (cervical cancer)	2014;2014;2015;2015;2015;2015	22;33;1;2;Unpublished;12
Reviewed	O43157	PLXNB1	Plexin-B1	1183	TLnGSKLL	KVHSIFPARGPRAGGTRLTLNGSKLLTGRLEDIRVVVGDQP	Liver	2014	33
Reviewed	O43157	PLXNB1	Plexin-B1	1253	nITSAGPTK	WFGATERRLQRGQFKYTLDPNITSAGPTKSFLSGGREICVR	OVCAR-3 cell line (Ovarian cancer)	2015	1
Reviewed	O43157	PLXNB1	Plexin-B1	1253	KYTIDPnITSAGP	WFGATERRLQRGQFKYTLDPNITSAGPTKSFLSGGREICVR	Breast Cancer cell lines	2013	37
Reviewed	O43157	PLXNB1	Plexin-B1	1253	TLDPnITSAGPTK	WFGATERRLQRGQFKYTLDPNITSAGPTKSFLSGGREICVR	Liver	2014	33
Reviewed	O43157	PLXNB1	Plexin-B1	1253	YTIDPnITSAGPTK	WFGATERRLQRGQFKYTLDPNITSAGPTKSFLSGGREICVR	DLBCL cell lines (Diffuse large B-cell lymphoma)	2014	16
Reviewed	O43157	PLXNB1	Plexin-B1	1253	YTLDPnITSAGPTK	WFGATERRLQRGQFKYTLDPNITSAGPTKSFLSGGREICVR	Plasma;Pancreatic islets;OVCAR-3 cell line (Ovarian cancer)Jurkat T cell line;Prostate;HEK293 cell line (embryonic kidney);Colorectal tumor;Liver;Ovarian tumor;OVCAR-3 cell line (Ovarian cancer);Breast cancer xenografts;Urine;Urine;Hela cell line (cervical cancer);Serum;Prostate tumor;Lymphocytes	2005;2012;2013;2014;2014;2014;2014;2014;2015;2015;2015;2015;2015;2015;2007;2007;2007	81;48;34;13;14;15;22;33;1;12;Unpublished;Unpublished;Unpublished
Reviewed	O43157	PLXNB1	Plexin-B1	1253	TLDPnITSAGPTKSF	WFGATERRLQRGQFKYTLDPNITSAGPTKSFLSGGREICVR	Liver	2014	33
Reviewed	O43157	PLXNB1	Plexin-B1	1253	TLDPnITSAGPTKSFL	WFGATERRLQRGQFKYTLDPNITSAGPTKSFLSGGREICVR	Liver	2014	33
Reviewed	O43157	PLXNB1	Plexin-B1	1253	KYTLDPnITSAGPTKSFL	WFGATERRLQRGQFKYTLDPNITSAGPTKSFLSGGREICVR	Liver	2009	64
Reviewed	O43157	PLXNB1	Plexin-B1	1330	nSSQLITCR	TACSLGPSCSSQQFEEPCHVNSSQLITCRTPALPGLPEDPW	OVCAR-3 cell line (Ovarian cancer)	2015	1
Reviewed	O43157	PLXNB1	Plexin-B1	1330	FEEPCHVnSSQL	TACSLGPSCSSQQFEEPCHVNSSQLITCRTPALPGLPEDPW	Liver	2009	64
Reviewed	O43157	PLXNB1	Plexin-B1	1330	TACSLGPSCSSQQFEEPCHVnSSQLITCR	TACSLGPSCSSQQFEEPCHVNSSQLITCRTPALPGLPEDPW	Liver	2014	33
Reviewed	O43157	PLXNB1	Plexin-B1	1330	VVPETACSLGPSCSSQQFEEPCHVnSSQLITCR	TACSLGPSCSSQQFEEPCHVNSSQLITCRTPALPGLPEDPW	Hela cell line (cervical cancer)	2015	12
Reviewed	O43166	SIPA1L1	Signal-induced proliferation-associated 1-like protein 1	127	VSQGSSVSLNSnDSAMLK	DSLSSKSSPVSQGSSVSLNSNDSAMLKSIQNTLKNKTRPSE	Urine	2007	Unpublished
Reviewed	O43166	SIPA1L1	Signal-induced proliferation-associated 1-like protein 1	358	RnTTTGASAAAVASLVSGPLSHSASFSSPMGSTEDLNSK	SILFDLNEAIMNRHNVIKRRNTTTGASAAAVASLVSGPLSH	Serum;Prostate tumor	2007;2007	Unpublished;Unpublished
Reviewed	O43166	SIPA1L1	Signal-induced proliferation-associated 1-like protein 1	1411	EnSTFSINDAASHTSTM	SLSLDIHSKSQAGSTPLTRENSTFSINDAASHTSTMSSRHS	Serum;Prostate tumor	2007;2007	Unpublished;Unpublished
Reviewed	O43173	ST8SIA3	Sia-alpha-2,3-Gal-beta-1,4-GlcNAc-R:alpha 2,8-sialyltransferase	113	QEILQHVDVIKnFSLTK	NRTAFLHQRQEILQHVDVIKNFSLTKNSVRIGQLMHYDYSS	Non-small Cell Lung Carcinoma	2014	18
Reviewed	O43181	NDUFS4	NADH dehydrogenase [ubiquinone] iron-sulfur protein 4, mitochondrial	163	SYGAnFSWNK	WSYDIEERKVPKPKSKSYGANFSWNKRTRVSTK--------	Urine;Urine;Prostate tumor	2007;2007;2007	Unpublished;Unpublished
Reviewed	O43182	ARHGAP6	Rho GTPase-activating protein 6	671	HSSTDSNKASSGDISPYDnNSPVLSER	GRHSSTDSNKASSGDISPYDNNSPVLSERSLLAMQEDAAPG	Serum;Prostate tumor	2007;2007	Unpublished;Unpublished
Reviewed	O43184	ADAM12	Disintegrin and metalloproteinase domain-containing protein 12	149	IVFEnESYVLEPMK	SDSAVSLSTCSGLRGLIVFENESYVLEPMKSATNRYKLFPA	Urine	2007	Unpublished
Reviewed	O43187	IRAK2	Interleukin-1 receptor-associated kinase-like 2	346	SSNVLLDQnLTPK	LHGLEIIHSNVKSSNVLLDQNLTPKLAHPMAHLCPVNKRSK	Prostate	2014	14
Reviewed	O43194	GPR39	G-protein coupled receptor 39	206	nMSICTNLSSR	HRGLTCNRSSTRHHEQPETSNMSICTNLSSRWTVFQSSIFG	OVCAR-3 cell line (Ovarian cancer)	2015	1
Reviewed	O43194	GPR39	G-protein coupled receptor 39	206	HHEQPETSnMSICTNLSSR	HRGLTCNRSSTRHHEQPETSNMSICTNLSSRWTVFQSSIFG	Liver	2014	33
Reviewed	O43194	GPR39	G-protein coupled receptor 39	212	NMSICTnLSSR	NRSSTRHHEQPETSNMSICTNLSSRWTVFQSSIFGAFVVYL	OVCAR-3 cell line (Ovarian cancer)	2015	1
Reviewed	O43194	GPR39	G-protein coupled receptor 39	212	HHEQPETSNMSICTnLSSR	NRSSTRHHEQPETSNMSICTNLSSRWTVFQSSIFGAFVVYL	Liver	2014	33
Reviewed	O43240	KLK10	Kallikrein-10	39	ALLPQnDTR	KLLPLLMAQLWAAEAALLPQNDTRLDPEAYGSPCARGSQPW	Urine;Ovarian tumor;Urine;Prostate tumor	2007;2015;2007;2007	Unpublished;Unpublished
Reviewed	O43242	PSMD3	26S proteasome non-ATPase regulatory subunit 3	125	AVQGFFTSNnATR	SRRLNHYVLYKAVQGFFTSNNATRDFLLPFLEEPMDTEADL	Urine;Urine	2015;2015;	Unpublished;Unpublished;Unpublished
Reviewed	O43251	RBFOX2	RNA binding protein fox-1 homolog 2	194	IEVNnATAR	DRAREKLHGTVVEGRKIEVNNATARVMTNKKMVTPYANGWK	Urine;Urine	2015;2015;	Unpublished;Unpublished;Unpublished
Reviewed	O43255	SIAH2	E3 ubiquitin-protein ligase SIAH2	316	GLnVTL	CLVFDTAIAHLFADNGNLGINVTISTCCP------------	Liver	2014	33
Reviewed	O43278	SPINT1	Kunitz-type protease inhibitor 1	66	nASVSNGATFLESPTVR	AGADCLNSFTAGVPGFVLDTNASVSNGATFLESPTVRRGWD	OVCAR-3 cell line (Ovarian cancer)	2015	1
Reviewed	O43278	SPINT1	Kunitz-type protease inhibitor 1	66	DTnASVSNGATFLESPTVR	AGADCLNSFTAGVPGFVLDTNASVSNGATFLESPTVRRGWD	Prostate tumor;Breast tumor;Breast cancer cell lines	2007;2007;2007	Unpublished;Unpublished;Unpublished
Reviewed	O43278	SPINT1	Kunitz-type protease inhibitor 1	235	nVTVTVLSTK	EGTYLFQLTVTSSDHPEDTANVTVTVLSTKQTEDYCLASNK	OVCAR-3 cell line (Ovarian cancer)	2015	1
Reviewed	O43278	SPINT1	Kunitz-type protease inhibitor 1	235	SSDHPEDTAnVTVTVLSTK	EGTYLFQLTVTSSDHPEDTANVTVTVLSTKQTEDYCLASNK	Prostate tumor;Breast tumor;Breast cancer cell lines	2007;2007;2007	Unpublished;Unpublished;Unpublished
Reviewed	O43278	SPINT1	Kunitz-type protease inhibitor 1	235	TVTSSDHPEDTAnVTVTVLSTK	EGTYLFQLTVTSSDHPEDTANVTVTVLSTKQTEDYCLASNK	Ovarian tumor	2015	Unpublished
Reviewed	O43278	SPINT1	Kunitz-type protease inhibitor 1	235	EGTYLFQLTVTSSDHPEDTAnVTVTVLSTK	EGTYLFQLTVTSSDHPEDTANVTVTVLSTKQTEDYCLASNK	LNCap/PC3 cell lines (Prostate cancer)	2015	2
Reviewed	O43280	TREH	Trehalase	369	LGnDSQATK	LNAFLCQAEELMSNFYSRLGNDSQATKYRILRSQRLAALNT	Liver	2014	33
Reviewed	O43286	B4GALT5	Beta-1,4-galactosyltransferase 5	111	nHTCPER	HSETFLQTTTFLPEDFTYFANHTCPERLPSMKGPIDINMSE	OVCAR-3 cell line (Ovarian cancer)	2015	1
Reviewed	O43286	B4GALT5	Beta-1,4-galactosyltransferase 5	128	GPIDInMSEIGMDYIHELFSKDPTIK	YFANHTCPERLPSMKGPIDINMSEIGMDYIHELFSKDPTIK	OVCAR-3 cell line (Ovarian cancer)	2015	1
Reviewed	O43286	B4GALT5	Beta-1,4-galactosyltransferase 5	364	nITYDALYK	LRKSKERQGLDGLNNLNYFANITYDALYKNITVNLTPELAQ	OVCAR-3 cell line (Ovarian cancer)	2015	1
Reviewed	O43286	B4GALT5	Beta-1,4-galactosyltransferase 5	364	QGLDGLNNLNYFAnITYDALYK	LRKSKERQGLDGLNNLNYFANITYDALYKNITVNLTPELAQ	HCCLM3 cell line (Liver);Ovarian tumor	2009;2015	63;Unpublished
Reviewed	O43286	B4GALT5	Beta-1,4-galactosyltransferase 5	364	ERQGLDGLNNLNYFAnITYDALYK	LRKSKERQGLDGLNNLNYFANITYDALYKNITVNLTPELAQ	HepG2 cell line (Liver);HuH-7 cell line (Liver)	2013;2013	38;38
Reviewed	O43286	B4GALT5	Beta-1,4-galactosyltransferase 5	373	nITVNLTPELAQVNEY	LDGLNNLNYFANITYDALYKNITVNLTPELAQVNEY-----	Breast cancer xenografts	2015	Unpublished
Reviewed	O43286	B4GALT5	Beta-1,4-galactosyltransferase 5	377	NITVnLTPELAQVNEY	NNLNYFANITYDALYKNITVNLTPELAQVNEY---------	Breast cancer xenografts	2015	Unpublished
Reviewed	O43290	SART1	U4/U6.U5 tri-snRNP-associated protein 1	554	nATSEFCR	SRQRGWEEDEDPERKGAIVFNATSEFCRTLGEIPTYGLAGN	OVCAR-3 cell line (Ovarian cancer)	2015	1
Reviewed	O43291	SPINT2	Kunitz-type protease inhibitor 2	57	WWYnVTDGSCQ	FCLVSKVVGRCRASMPRWWYNVTDGSCQLFVYGGCDGNSNN	Prostate tumor;Ovarian tumor	2007;2007	Unpublished;Unpublished
Reviewed	O43291	SPINT2	Kunitz-type protease inhibitor 2	57	nVTDGSCQLFVYGGCDGNSNNYLTK	FCLVSKVVGRCRASMPRWWYNVTDGSCQLFVYGGCDGNSNN	OVCAR-3 cell line (Ovarian cancer)	2015	1
Reviewed	O43291	SPINT2	Kunitz-type protease inhibitor 2	94	nATGDLATSR	NSNNYLTKEECLKKCATVTENATGDLATSRNAADSSVPSAP	OVCAR-3 cell line (Ovarian cancer)	2015	1
Reviewed	O43291	SPINT2	Kunitz-type protease inhibitor 2	94	KCATVTEnATGD	NSNNYLTKEECLKKCATVTENATGDLATSRNAADSSVPSAP	Prostate;Prostate tumor	2014;2015	14;Unpublished
Reviewed	O43291	SPINT2	Kunitz-type protease inhibitor 2	94	CATVTEnATGDIA	NSNNYLTKEECLKKCATVTENATGDLATSRNAADSSVPSAP	Breast Cancer cell lines	2013	37
Reviewed	O43291	SPINT2	Kunitz-type protease inhibitor 2	94	CATVTEnATGDIATSR	NSNNYLTKEECLKKCATVTENATGDLATSRNAADSSVPSAP	Spermatozoa	2013	43
Reviewed	O43291	SPINT2	Kunitz-type protease inhibitor 2	94	CATVTEnATGDLATSR	NSNNYLTKEECLKKCATVTENATGDLATSRNAADSSVPSAP	Urine;ovarian tumor;Breast cell lines;Ovarian tumor;UrineJurkat T cell line;Non-small Cell Lung Carcinoma;OVCAR-3 cell line (Ovarian cancer);Breast cancer xenografts;Urine;Urine;Urine;Prostate tumor;Breast tumor;Breast cancer cell lines;Ovarian tumor;Ovarian cancer cell lines	2007;2011;2012;2013;2013;2014;2014;2015;2015;2015;2015;2007;2007;2007;2007;2007;2007	54;52;34;45;13;18;1;Unpublished;Unpublished;Unpublished;Unpublished;Unpublished;Unpublished
Reviewed	O43291	SPINT2	Kunitz-type protease inhibitor 2	94	KCATVTEnATGDIATSR	NSNNYLTKEECLKKCATVTENATGDLATSRNAADSSVPSAP	DLBCL cell lines (Diffuse large B-cell lymphoma)	2014	16
Reviewed	O43291	SPINT2	Kunitz-type protease inhibitor 2	94	KCATVTEnATGDLATSR	NSNNYLTKEECLKKCATVTENATGDLATSRNAADSSVPSAP	Breast cell lines;OVCAR-3 cell line (Ovarian cancer);Urine;OVCAR-3 cell line (Ovarian cancer);Urine;Urine	2012;2013;2013;2015;2015;2015;	52;34;45;1;Unpublished;Unpublished;Unpublished
Reviewed	O43292	GPAA1	Glycosylphosphatidylinositol anchor attachment 1 protein	203	AYHDVnVTGMQ	LVTEHDLLGTEAWLEAYHDVNVTGMQSSPLQGRAGAIQAAV	Liver	2014	33
Reviewed	O43292	GPAA1	Glycosylphosphatidylinositol anchor attachment 1 protein	203	HDVnVTGMQSSPL	LVTEHDLLGTEAWLEAYHDVNVTGMQSSPLQGRAGAIQAAV	Liver	2014	33
Reviewed	O43292	GPAA1	Glycosylphosphatidylinositol anchor attachment 1 protein	203	nVTGMQSSPLQGR	LVTEHDLLGTEAWLEAYHDVNVTGMQSSPLQGRAGAIQAAV	OVCAR-3 cell line (Ovarian cancer)	2015	1
Reviewed	O43292	GPAA1	Glycosylphosphatidylinositol anchor attachment 1 protein	203	AYHDVnVTGMQSSPLQGR	LVTEHDLLGTEAWLEAYHDVNVTGMQSSPLQGRAGAIQAAV	Liver	2014	33
Reviewed	O43292	GPAA1	Glycosylphosphatidylinositol anchor attachment 1 protein	203	DIVFLVTEHDLLGTEAWLEAYHDVnVTGMQSSPLQGR	LVTEHDLLGTEAWLEAYHDVNVTGMQSSPLQGRAGAIQAAV	LNCap/PC3 cell lines (Prostate cancer)	2015	2
Reviewed	O43293	DAPK3	Death-associated protein kinase 3	316	SHSSLPPnNSYADFER	RLKTTRLKEYTIKSHSSLPPNNSYADFERFSKVLEEAAAAE	Prostate	2014	14
Reviewed	O43295	SRGAP3	SLIT-ROBO Rho GTPase-activating protein 3	193	QFnKSGDLSMNLLRHEDRPQ	ESISAESKLKEAEKQEEKQFNKSGDLSMNLLRHEDRPQRRS	Urine	2007	Unpublished
Reviewed	O43300	LRRTM2	Leucine-rich repeat transmembrane neuronal protein 2	477	LHMSnMSDQGPYNEYEPTHEGPFIIINGYGQCK	QCSMVQNHRQLRSQTRLHMSNMSDQGPYNEYEPTHEGPFII	Serum	2015	Unpublished
Reviewed	O43303	CCP110	Centriolar coiled-coil protein of 110 kDa	257	IVnESHLDK	EYIEREQSRRSLRGSINRIVNESHLDKEHDAVEVADCVKEK	Colorectal tumor;Breast cancer xenografts	2014;2015	22;Unpublished
Reviewed	O43306	ADCY6	Adenylate cyclase type 6	987	NDELYYQSCECVAVMFASIAnFSEFYVELEANNEGVECLR	NDELYYQSCECVAVMFASIANFSEFYVELEANNEGVECLRL	Serum	2015	Unpublished
Reviewed	O43306	ADCY6	Adenylate cyclase type 6	1044	ASGLnASTYDQVGR	FRQLEKIKTIGSTYMAASGLNASTYDQVGRSHITALADYAM	Urine	2007	Unpublished
Reviewed	O43315	AQP9	Aquaporin-9	142	IVGEnATAH	GIYYDGLMSFAGGKLLIVGENATAHIFATYPAPYLSLANAF	Liver	2014	33
Reviewed	O43315	AQP9	Aquaporin-9	142	IVGEnATAHI	GIYYDGLMSFAGGKLLIVGENATAHIFATYPAPYLSLANAF	Liver	2014	33
Reviewed	O43315	AQP9	Aquaporin-9	142	LIVGEnATAH	GIYYDGLMSFAGGKLLIVGENATAHIFATYPAPYLSLANAF	Liver	2014	33
Reviewed	O43315	AQP9	Aquaporin-9	142	IVGEnATAHIF	GIYYDGLMSFAGGKLLIVGENATAHIFATYPAPYLSLANAF	Liver	2014	33
Reviewed	O43315	AQP9	Aquaporin-9	142	LIVGEnATAHI	GIYYDGLMSFAGGKLLIVGENATAHIFATYPAPYLSLANAF	Liver	2014	33
Reviewed	O43315	AQP9	Aquaporin-9	142	LIVGEnATAHIF	GIYYDGLMSFAGGKLLIVGENATAHIFATYPAPYLSLANAF	Liver	2014	33
Reviewed	O43315	AQP9	Aquaporin-9	142	LLIVGEnATAHIF	GIYYDGLMSFAGGKLLIVGENATAHIFATYPAPYLSLANAF	Liver	2014	33
Reviewed	O43315	AQP9	Aquaporin-9	142	AGGKLLIVGEnATAH	GIYYDGLMSFAGGKLLIVGENATAHIFATYPAPYLSLANAF	Liver	2014	33
Reviewed	O43315	AQP9	Aquaporin-9	142	AGGKLLIVGEnATAHI	GIYYDGLMSFAGGKLLIVGENATAHIFATYPAPYLSLANAF	Liver	2014	33
Reviewed	O43315	AQP9	Aquaporin-9	142	AGGKLLIVGEnATAHIF	GIYYDGLMSFAGGKLLIVGENATAHIFATYPAPYLSLANAF	Liver	2014	33
Reviewed	O43315	AQP9	Aquaporin-9	142	IVGEnATAHIFATYPAPY	GIYYDGLMSFAGGKLLIVGENATAHIFATYPAPYLSLANAF	Liver	2014	33
Reviewed	O43318	MAP3K7	Mitogen-activated protein kinase kinase kinase 7	245	nGTRPPLIK	RRKPFDEIGGPAFRIMWAVHNGTRPPLIKNLPKPIESLMTR	OVCAR-3 cell line (Ovarian cancer)	2015	1
Reviewed	O43318	MAP3K7	Mitogen-activated protein kinase kinase kinase 7	326	MDIASTnTSNK	DEGQSNSATSTGSFMDIASTNTSNKSDTNMEQVPATNDTIK	Prostate	2014	14
Reviewed	O43318	MAP3K7	Mitogen-activated protein kinase kinase kinase 7	329	MDIASTNTSnK	QSNSATSTGSFMDIASTNTSNKSDTNMEQVPATNDTIKRLE	Prostate	2014	14
Reviewed	O43318	MAP3K7	Mitogen-activated protein kinase kinase kinase 7	342	SDTNMEQVPATnDTIKR	IASTNTSNKSDTNMEQVPATNDTIKRLESKLLKNQAKQQSE	Urine;Urine;Prostate tumor	2007;2007;2007	Unpublished;Unpublished
Reviewed	O43325	LYRM1	LYR motif-containing protein 1	53	NKnLTDTDLIK	TIKEKQYILNEARTLFRKNKNLTDTDLIKQCIDECTARIEI	Urine;Urine	2015;2015;	Unpublished;Unpublished;Unpublished
Reviewed	O43353	RIPK2	Receptor-interacting serine/threonine-protein kinase 2	457	REDIVNQMTEACLnQSLDALLSRDLIMK	QQWIQSKREDIVNQMTEACLNQSLDALLSRDLIMKEDYELV	Urine;Urine;Prostate tumor	2007;2007;2007	Unpublished;Unpublished
Reviewed	O43361	ZNF749	Zinc finger protein 749	151	nFTCTQGGK	TRSDEWRPSFVNHSAHVGERNFTCTQGGKDFTASSDLLQQQ	Prostate	2014	14
Reviewed	O43374	RASA4	Ras GTPase-activating protein 4	151	DRnGTSDPFVR	RACRLRCSVLEARDLAPKDRNGTSDPFVRVRYKGRTRETSI	Urine;Urine	2015;2015;	Unpublished;Unpublished;Unpublished
Reviewed	O43390	HNRNPR	Heterogeneous nuclear ribonucleoprotein R	93	ESDLSHVQnK	EEGALSVLQQFKESDLSHVQNKSAFLCGVMKTYRQREKQGS	Ovarian tumor	2015	Unpublished
Reviewed	O43399	TPD52L2	Tumor protein D54	184	nGSDNLPSSAGSGDKPLSDPAPF	FKSFEDRVGTIKSKVVGDRENGSDNLPSSAGSGDKPLSDPA	OVCAR-3 cell line (Ovarian cancer)	2015	1
Reviewed	O43399	TPD52L2	Tumor protein D54	184	VVGDREnGSDNLPSSAGSGDKPLSDPAPF	FKSFEDRVGTIKSKVVGDRENGSDNLPSSAGSGDKPLSDPA	Hela cell line (cervical cancer)	2014	17
Reviewed	O43405	COCH	Cochlin	100	SIPGREnYSSVDA	RGVISNSGGPVRVYSLPGRENYSSVDANGIQSQMLSRWSAS	Breast Cancer cell lines	2013	37
Reviewed	O43405	COCH	Cochlin	100	EnYSSVDANGIQSQMLSR	RGVISNSGGPVRVYSLPGRENYSSVDANGIQSQMLSRWSAS	Urine; HCC cell lines (Liver);Urine;Urine;Urine;Urine;Urine;Prostate tumor	2007;2013;2013;2015;2015;2015;2007;2007	40;45;Unpublished;Unpublished
Reviewed	O43405	COCH	Cochlin	100	VYSIPGREnYSSVDANGIQSQMISR	RGVISNSGGPVRVYSLPGRENYSSVDANGIQSQMLSRWSAS	DLBCL cell lines (Diffuse large B-cell lymphoma)	2014	16
Reviewed	O43405	COCH	Cochlin	100	VYSLPGREnYSSVDANGIQSQMLSR	RGVISNSGGPVRVYSLPGRENYSSVDANGIQSQMLSRWSAS	Pancreatic islets;HuH-7 cell line (Liver);Urine;Non-small Cell Lung Carcinoma;Urine;Urine;Urine	2012;2013;2013;2014;2015;2015;2015;	48;38;45;18;Unpublished;Unpublished;Unpublished;Unpublished
Reviewed	O43405	COCH	Cochlin	100	GVISNSGGPVRVYSLPGREnYSSVDANGIQSQMLSR	RGVISNSGGPVRVYSLPGRENYSSVDANGIQSQMLSRWSAS	HuH-7 cell line (Liver)	2013	38
Reviewed	O43405	COCH	Cochlin	221	IEFYIKnFTSAK	GPHVGLVQASEHPKIEFYLKNFTSAKDVLFAIKEVGFRGGN	DLBCL cell lines (Diffuse large B-cell lymphoma)	2014	16
Reviewed	O43405	COCH	Cochlin	221	nFTSAKDVLFAIK	GPHVGLVQASEHPKIEFYLKNFTSAKDVLFAIKEVGFRGGN	Non-small Cell Lung Carcinoma	2014	18
Reviewed	O43426	SYNJ1	Synaptojanin-1	961	LLnRTL	TFLEGSSALNVLSLNGKELLNRTITIALKSPDWIKNLEEEM	Liver	2014	33
Reviewed	O43451	MGAM	Maltase-glucoamylase, intestinal	135	nHSYHVEGNLVNTNAGFTAR	RGCCWNPQGAVSVPWCYYSKNHSYHVEGNLVNTNAGFTARL	Urine;Urine	2015;2015;	Unpublished;Unpublished;Unpublished
Reviewed	O43451	MGAM	Maltase-glucoamylase, intestinal	295	IFNRDTTPNGnGTNLYGAQT	RHDMNWKTWPIFNRDTTPNGNGTNLYGAQTFFLCLEDASGL	Human	2015	6
Reviewed	O43451	MGAM	Maltase-glucoamylase, intestinal	457	LVIIVDPAISnNSSSSKPYGPYDR	VNELHNNGQKLVIIVDPAISNNSSSSKPYGPYDRGSDMKIW	Urine;Urine;Urine;Urine;Urine;Prostate tumor	2007;2015;2015;2015;2007;2007	Unpublished;Unpublished
Reviewed	O43451	MGAM	Maltase-glucoamylase, intestinal	458	LVIIVDPAISNnSSSSKPYGPYDR	NELHNNGQKLVIIVDPAISNNSSSSKPYGPYDRGSDMKIWV	Urine;Urine;Urine;Urine;Urine;Prostate tumor	2007;2015;2015;2015;2007;2007	Unpublished;Unpublished
Reviewed	O43451	MGAM	Maltase-glucoamylase, intestinal	707	DQDPASFGADSLLLnSSR	NGQGYKDQDPASFGADSLLLNSSRHYLNIRYTLLPYLYTLF	Urine;Urine;Urine	2015;2015;2015;	Unpublished;Unpublished;Unpublished;Unpublished
Reviewed	O43451	MGAM	Maltase-glucoamylase, intestinal	707	NHNGQGYKDQDPASFGADSLLLnSSR	NGQGYKDQDPASFGADSLLLNSSRHYLNIRYTLLPYLYTLF	Urine;Urine;Urine;Urine;Urine;Prostate tumor	2007;2015;2015;2015;2007;2007	Unpublished;Unpublished
Reviewed	O43451	MGAM	Maltase-glucoamylase, intestinal	827	GGYIFPTQQPnTTTLASR	PGDKIGLHLRGGYIFPTQQPNTTTLASRKNPLGLIIALDEN	Urine;Urine;Urine;Urine;Prostate tumor	2007;2015;2015;2007;2007	Unpublished;Unpublished
Reviewed	O43451	MGAM	Maltase-glucoamylase, intestinal	827	GGYIFPTQQPnTTTLASRKN	PGDKIGLHLRGGYIFPTQQPNTTTLASRKNPLGLIIALDEN	Human	2015	6
Reviewed	O43451	MGAM	Maltase-glucoamylase, intestinal	885	LEVnISQSTYK	VANKVYLLCEFSVTQNRLEVNISQSTYKDPNNLAFNEIKIL	Urine;Prostate;Urine;Urine;Urine;Urine;Prostate tumor	2007;2014;2015;2015;2015;2007;2007	14;Unpublished;Unpublished
Reviewed	O43451	MGAM	Maltase-glucoamylase, intestinal	885	LEVnISQSTYKDPNNLAFNEIK	VANKVYLLCEFSVTQNRLEVNISQSTYKDPNNLAFNEIKIL	Urine;Urine;Urine	2015;2015;2015;	Unpublished;Unpublished;Unpublished;Unpublished
Reviewed	O43451	MGAM	Maltase-glucoamylase, intestinal	912	ILGTEEPSnVTVK	KDPNNLAFNEIKILGTEEPSNVTVKHNGVPSQTSPTVTYDS	Urine;Prostate;Urine;Urine;Urine;Prostate tumor	2007;2014;2015;2015;2007;2007	14;Unpublished;Unpublished
Reviewed	O43451	MGAM	Maltase-glucoamylase, intestinal	977	IDCYPDENGASAEnCTAR	KIRDEEKIDCYPDENGASAENCTARGCIWEASNSSGVPFCY	Urine;Urine;Urine;Urine;Urine;Prostate tumor	2007;2013;2015;2015;2007;2007	45;Unpublished;Unpublished
Reviewed	O43451	MGAM	Maltase-glucoamylase, intestinal	977	IRDEEKIDCYPDENGASAEnCTAR	KIRDEEKIDCYPDENGASAENCTARGCIWEASNSSGVPFCY	Urine;Urine	2015;2015;	Unpublished;Unpublished;Unpublished
Reviewed	O43451	MGAM	Maltase-glucoamylase, intestinal	1323	DPAISGnETQPYP	NRMKADGMRVILILDPAISGNETQPYPAFTRGVEDDVFIKY	Breast Cancer cell lines	2013	37
Reviewed	O43451	MGAM	Maltase-glucoamylase, intestinal	1323	VIIIIDPAISGnETQPYPAFTR	NRMKADGMRVILILDPAISGNETQPYPAFTRGVEDDVFIKY	Liver	2014	32
Reviewed	O43451	MGAM	Maltase-glucoamylase, intestinal	1323	VILILDPAISGnETQPYPAFTR	NRMKADGMRVILILDPAISGNETQPYPAFTRGVEDDVFIKY	Urine;Urine;Liver;Breast cancer xenografts;Urine;Urine;Urine;Prostate tumor	2007;2013;2014;2015;2015;2015;2007;2007	45;33;Unpublished;Unpublished
Reviewed	O43451	MGAM	Maltase-glucoamylase, intestinal	1388	AYVAFPDFFRnSTAK	DWDSQVELYRAYVAFPDFFRNSTAKWWKREIEELYNNPQNP	Urine;Urine;Prostate tumor	2007;2007;2007	Unpublished;Unpublished
Reviewed	O43451	MGAM	Maltase-glucoamylase, intestinal	1603	QDPVSWDVAFVnISR	NHNTIGTRRQDPVSWDVAFVNISRTVLQTRYTLLPYLYTLM	Urine;Liver;Urine;Urine;Urine;Urine;Prostate tumor	2007;2014;2015;2015;2015;2007;2007	33;Unpublished;Unpublished
Reviewed	O43451	MGAM	Maltase-glucoamylase, intestinal	1603	RQDPVSWDVAFVnISR	NHNTIGTRRQDPVSWDVAFVNISRTVLQTRYTLLPYLYTLM	Spermatozoa;Urine;Urine;Urine	2013;2015;2015;2015;	43;Unpublished;Unpublished;Unpublished;Unpublished
Reviewed	O43451	MGAM	Maltase-glucoamylase, intestinal	1672	nVTAYFPR	SQFLLGPAFLVSPVLERNARNVTAYFPRARWYDYYTGVDIN	Urine;Urine;Liver;Urine;Urine;Urine;Prostate tumor	2007;2013;2014;2015;2015;2007;2007	45;33;Unpublished;Unpublished
Reviewed	O43451	MGAM	Maltase-glucoamylase, intestinal	1842	nISLHNFTSL	TPSFNNDPTTQVLSIDVTDRNISLHNFTSLTWISTL-----	Urine;Urine;Prostate tumor	2007;2007;2007	Unpublished;Unpublished
Reviewed	O43451	MGAM	Maltase-glucoamylase, intestinal	1847	NISLHnFTSL	NDPTTQVLSIDVTDRNISLHNFTSLTWISTL----------	Urine;Urine;Prostate tumor	2007;2007;2007	Unpublished;Unpublished
Reviewed	O43462	MBTPS2	Membrane-bound transcription factor site-2 protease	337	nHSLTDVCFSYR	QLSFPVRAYKRLDGSTECCNNHSLTDVCFSYRNNFNKRLHT	OVCAR-3 cell line (Ovarian cancer)	2015	1
Reviewed	O43462	MBTPS2	Membrane-bound transcription factor site-2 protease	337	LDGSTECCNnHSLTDVCFSYR	QLSFPVRAYKRLDGSTECCNNHSLTDVCFSYRNNFNKRLHT	Breast cancer xenografts	2015	Unpublished
Reviewed	O43462	MBTPS2	Membrane-bound transcription factor site-2 protease	337	RIDGSTECCNnHSITDVCFSYR	QLSFPVRAYKRLDGSTECCNNHSLTDVCFSYRNNFNKRLHT	DLBCL cell lines (Diffuse large B-cell lymphoma)	2014	16
Reviewed	O43482	OIP5	Protein Mis18-beta	181	AIVnASEMDIQNVPLSEK	HFCLSSDKMVCYLLKTKAIVNASEMDIQNVPLSEKIAELKE	Prostate tumor;Ovarian tumor	2007;2007	Unpublished;Unpublished
Reviewed	O43490	PROM1	Prominin-1	206	TLLnETPEQIK	RIKRSRKLADSNFKDLRTLLNETPEQIKYILAQYNTTKDKA	Colorectal tumor	2014	22
Reviewed	O43490	PROM1	Prominin-1	220	YILAQYnTTK	DLRTLLNETPEQIKYILAQYNTTKDKAFTDLNSINSVLGGG	Urine;Breast tumor;Pancreatic islets;HuH-7 cell line (Liver);lung;Urine;Lung Adenocarcinoma;Colorectal tumor;Liver;Breast cancer xenografts;Urine;Urine;Urine;Prostate tumor;Breast tumor;Ovarian tumor	2007;2012;2012;2013;2013;2013;2014;2014;2014;2015;2015;2015;2007;2007;2007;2007	3;48;38;39;45;36;22;33;Unpublished;Unpublished;Unpublished;Unpublished
Reviewed	O43490	PROM1	Prominin-1	220	YILAQYnTTKDK	DLRTLLNETPEQIKYILAQYNTTKDKAFTDLNSINSVLGGG	Urine;Urine	2015;2015;	Unpublished;Unpublished;Unpublished
Reviewed	O43490	PROM1	Prominin-1	220	YIIAQYnTTKDKA	DLRTLLNETPEQIKYILAQYNTTKDKAFTDLNSINSVLGGG	Breast Cancer cell lines	2013	37
Reviewed	O43490	PROM1	Prominin-1	274	EALENMnSTLK	DEIKSMATAIKETKEALENMNSTLKSLHQQSTQLSSSLTSV	Urine;ARO Cell Line (Thyroid Cance);ovarian tumor;Colorectal cancer cell line, HCT-116 (colorectal cancer);lung;Urine;Prostate;Lung Adenocarcinoma;Colorectal tumor;Ovarian tumor;Breast cancer xenografts;Prostate tumor;Urine;Urine;Urine;Prostate tumor;Ovarian tumor	2007;2009;2011;2011;2013;2013;2014;2014;2014;2015;2015;2015;2015;2015;2007;2007;2007	62;54;58;39;45;14;36;22;Unpublished;Unpublished;Unpublished
Reviewed	O43490	PROM1	Prominin-1	274	EAIENMnSTIKSI	DEIKSMATAIKETKEALENMNSTLKSLHQQSTQLSSSLTSV	Breast Cancer cell lines	2013	37
Reviewed	O43490	PROM1	Prominin-1	274	SMATAIKETKEALENMnSTLK	DEIKSMATAIKETKEALENMNSTLKSLHQQSTQLSSSLTSV	Colorectal cancer cell line, HCT-116 (colorectal cancer)	2011	58
Reviewed	O43490	PROM1	Prominin-1	395	IGSDIDnVTQRIP	TTTVVAGIKRVLNSIGSDIDNVTQRLPIQDILSAFSVYVNN	Breast Cancer cell lines	2013	37
Reviewed	O43490	PROM1	Prominin-1	395	VLNSIGSDIDnVTQR	TTTVVAGIKRVLNSIGSDIDNVTQRLPIQDILSAFSVYVNN	Urine;ARO Cell Line (Thyroid Cance);Colorectal cancer cell line, HCT-116 (colorectal cancer);Pancreatic islets; HCC cell lines (Liver);Urine;Colorectal tumor;Liver;Breast cancer xenografts;Urine;Urine;Urine;Prostate tumor;Ovarian tumor	2007;2009;2011;2012;2013;2013;2014;2014;2015;2015;2015;2007;2007;2007	62;58;48;40;45;22;33;Unpublished;Unpublished;Unpublished
Reviewed	O43490	PROM1	Prominin-1	395	RVLNSIGSDIDnVTQR	TTTVVAGIKRVLNSIGSDIDNVTQRLPIQDILSAFSVYVNN	Urine;Urine	2015;2015;	Unpublished;Unpublished;Unpublished
Reviewed	O43490	PROM1	Prominin-1	395	RVLNSIGSDIDnVTQRLPIQDILSAFSVYVNNTESYIHR	TTTVVAGIKRVLNSIGSDIDNVTQRLPIQDILSAFSVYVNN	HuH-7 cell line (Liver)	2013	38
Reviewed	O43490	PROM1	Prominin-1	414	SVYVnNTESYIHR	DNVTQRLPIQDILSAFSVYVNNTESYIHRNLPTLEEYDSYW	Ovarian tumor	2015	Unpublished
Reviewed	O43490	PROM1	Prominin-1	414	LPIQDILSAFSVYVnNTE	DNVTQRLPIQDILSAFSVYVNNTESYIHRNLPTLEEYDSYW	Liver	2014	33
Reviewed	O43490	PROM1	Prominin-1	414	LPIQDILSAFSVYVnNTESYIHR	DNVTQRLPIQDILSAFSVYVNNTESYIHRNLPTLEEYDSYW	Colorectal cancer cell line, HCT-116 (colorectal cancer);Serum	2011;2015	58;Unpublished
Reviewed	O43490	PROM1	Prominin-1	414	RVLNSIGSDIDNVTQRLPIQDILSAFSVYVnNTESYIHR	DNVTQRLPIQDILSAFSVYVNNTESYIHRNLPTLEEYDSYW	HuH-7 cell line (Liver)	2013	38
Reviewed	O43491	EPB41L2	Band 4.1-like protein 2	36	EVAENQQnQSSDPEEEKGSQPPPAAESQSSLR	SQLGTDATKEKPKEVAENQQNQSSDPEEEKGSQPPPAAESQ	Liver	2014	33
Reviewed	O43493	TGOLN2	Trans-Golgi network integral membrane protein 2	39	nVSTHPSLSQRPGGSTK	PLLATESVKQEEAGVRPSAGNVSTHPSLSQRPGGSTKSHPE	OVCAR-3 cell line (Ovarian cancer)	2015	1
Reviewed	O43493	TGOLN2	Trans-Golgi network integral membrane protein 2	39	QEEAGVRPSAGnVSTHPSLSQR	PLLATESVKQEEAGVRPSAGNVSTHPSLSQRPGGSTKSHPE	Ovarian tumor	2015	Unpublished
Reviewed	O43493	TGOLN2	Trans-Golgi network integral membrane protein 2	39	AGVRPSAGnVSTHPSLSQRPGGSTK	PLLATESVKQEEAGVRPSAGNVSTHPSLSQRPGGSTKSHPE	Liver	2014	33
Reviewed	O43493	TGOLN2	Trans-Golgi network integral membrane protein 2	39	QEEAGVRPSAGnVSTHPSISQRPGGSTK	PLLATESVKQEEAGVRPSAGNVSTHPSLSQRPGGSTKSHPE	DLBCL cell lines (Diffuse large B-cell lymphoma)	2014	16
Reviewed	O43493	TGOLN2	Trans-Golgi network integral membrane protein 2	39	QEEAGVRPSAGnVSTHPSLSQRPGGSTK	PLLATESVKQEEAGVRPSAGNVSTHPSLSQRPGGSTKSHPE	Urine;Urine;Ovarian tumor;OVCAR-3 cell line (Ovarian cancer);Prostate tumor;Urine;Urine;Urine;Urine;Prostate tumor;Breast tumor;Breast cancer cell lines	2007;2013;2015;2015;2015;2015;2015;2015;2007;2007;2007;2007	45;1;Unpublished;Unpublished;Unpublished;Unpublished
Reviewed	O43493	TGOLN2	Trans-Golgi network integral membrane protein 2	152	SGAEAQTPEDSPnRSGAEAK	TPKDSTGKSGAEAQTPEDSPNRSGAEAKTQKDSPSKSGSEA	DLBCL cell lines (Diffuse large B-cell lymphoma)	2014	16
Reviewed	O43505	B4GAT1	Beta-1,4-glucuronyltransferase 1	204	nVSYPNNLLR	EVFDKLARVAQPGINYALGTNVSYPNNLLRNLAREGANYAL	OVCAR-3 cell line (Ovarian cancer)	2015	1
Reviewed	O43505	B4GAT1	Beta-1,4-glucuronyltransferase 1	204	NYAIGTnVSYPNN	EVFDKLARVAQPGINYALGTNVSYPNNLLRNLAREGANYAL	Breast Cancer cell lines	2013	37
Reviewed	O43505	B4GAT1	Beta-1,4-glucuronyltransferase 1	204	VAQPGINYAIGTnVSYPNNIIR	EVFDKLARVAQPGINYALGTNVSYPNNLLRNLAREGANYAL	DLBCL cell lines (Diffuse large B-cell lymphoma)	2014	16
Reviewed	O43505	B4GAT1	Beta-1,4-glucuronyltransferase 1	204	VAQPGINYALGTnVSYPNNLLR	EVFDKLARVAQPGINYALGTNVSYPNNLLRNLAREGANYAL	Urine;HCCLM3 cell line (Liver);Pancreatic islets;Breast cell lines;HepG2 cell line (Liver);HuH-7 cell line (Liver); HCC cell lines (Liver);Urine;Prostate;HEK293 cell line (embryonic kidney);Non-small Cell Lung Carcinoma;Liver;Ovarian tumor;OVCAR-3 cell line (Ovarian cancer);LNCap/PC3 cell lines (Prostate cancer);Breast cancer xenografts;Urine;Urine;Urine;Cerebrospinal fluid;HEK293T cell line (emb…	2007;2009;2012;2012;2013;2013;2013;2013;2014;2014;2014;2014;2015;2015;2015;2015;2015;2015;2015;2015;2015;2015;2007;2007;2007;2007;2007	63;48;52;38;38;40;45;14;15;18;33;1;2;5;9;12;Unpublished;Unpublished;Unpublished;Unpublished;Unpublished
Reviewed	O43505	B4GAT1	Beta-1,4-glucuronyltransferase 1	300	NELVQLYQVGEVRPFYYGLCTPCQAPTnYSR	QVGEVRPFYYGLCTPCQAPTNYSRWVNLPEESLLRPAYVVP	Urine;Breast cell lines;HepG2 cell line (Liver);HuH-7 cell line (Liver);HEK293T cell line (embryonic kidney), HEK293T cell line (embryonic kidney);Urine;Prostate tumor;Breast tumor;Breast cancer cell lines;Ovarian tumor;Cerebrospinal fluid	2007;2012;2013;2013;2015;2007;2007;2007;2007;2007;2007	52;38;38;9;Unpublished;Unpublished;Unpublished;Unpublished;Unpublished;Unpublished
Reviewed	O43508	TNFSF12	Tumor necrosis factor ligand superfamily member 12	139	InSSSPLR	QDGAQAGVDGTVSGWEEARINSSSPLRYNRQIGEFIVTRAG	Breast cancer xenografts;Urine;Urine	2015;2015;2015;	Unpublished;Unpublished;Unpublished;Unpublished
Reviewed	O43516	WIPF1	WAS/WASL-interacting protein family member 1	338	nLSLSSSTPPLPSPGR	PPPLPPSSSGNDETPRLPQRNLSLSSSTPPLPSPGRSGPLP	Urine;Urine;Prostate tumor	2007;2007;2007	Unpublished;Unpublished
Reviewed	O43520	ATP8B1	Phospholipid-transporting ATPase IC	283	nTSFPLDADK	IECEEPNNRLDKFTGTLFWRNTSFPLDADKILLRGCVIRNT	Prostate	2014	14
Reviewed	O43520	ATP8B1	Phospholipid-transporting ATPase IC	368	EAQVGnSSWY	LILLSAGLAIGHAYWEAQVGNSSWYLYDGEDDTPSYRGFLI	Liver	2014	33
Reviewed	O43524	FOXO3	Forkhead box protein O3	431	GSGLGSPTSSFnSTVFGPSSLNSLR	SSSFPYTTKGSGLGSPTSSFNSTVFGPSSLNSLRQSPMQTI	Prostate tumor;Ovarian tumor	2007;2007	Unpublished;Unpublished
Reviewed	O43529	CHST10	Carbohydrate sulfotransferase 10	99	nLSHTPVSK	LVYMERLELIRNVCRDDALKNLSHTPVSKFVLDRIFVCDKH	Ovarian tumor	2015	Unpublished
Reviewed	O43529	CHST10	Carbohydrate sulfotransferase 10	99	DDAIKnISHTPVSK	LVYMERLELIRNVCRDDALKNLSHTPVSKFVLDRIFVCDKH	DLBCL cell lines (Diffuse large B-cell lymphoma)	2014	16
Reviewed	O43529	CHST10	Carbohydrate sulfotransferase 10	99	DDALKnLSHTPVSK	LVYMERLELIRNVCRDDALKNLSHTPVSKFVLDRIFVCDKH	UrineJurkat T cell line;Ovarian tumor;Urine;Prostate tumor	2007;2014;2015;2007;2007	13;Unpublished;Unpublished
Reviewed	O43556	SGCE	Epsilon-sarcoglycan	200	RLNAInI	LGDFLGAVKNVWQPERLNAINITSALDRGGRVPLPINDLKE	Liver	2014	33
Reviewed	O43556	SGCE	Epsilon-sarcoglycan	200	NAInITSALDR	LGDFLGAVKNVWQPERLNAINITSALDRGGRVPLPINDLKE	Prostate	2014	14
Reviewed	O43556	SGCE	Epsilon-sarcoglycan	200	INAInITSAIDR	LGDFLGAVKNVWQPERLNAINITSALDRGGRVPLPINDLKE	DLBCL cell lines (Diffuse large B-cell lymphoma)	2014	16
Reviewed	O43556	SGCE	Epsilon-sarcoglycan	200	LNAInITSALDR	LGDFLGAVKNVWQPERLNAINITSALDRGGRVPLPINDLKE	Urine;HCCLM3 cell line (Liver);Liver;Bladder stromal cell line;Prostate stromal cell line;ovarian tumor;Pancreatic islets; HCC cell lines (Liver);Prostate;Hela cell line (cervical cancer);Non-small Cell Lung Carcinoma;Colorectal tumor;Liver;Ovarian tumor;OVCAR-3 cell line (Ovarian cancer);Breast cancer xenografts;Prostate tumor;Urine;Urine;Hela cell line (cervical cancer);Urine;Prostate tumor;Ova…	2007;2009;2009;2009;2009;2011;2012;2013;2014;2014;2014;2014;2014;2015;2015;2015;2015;2015;2015;2015;2007;2007;2007;2007	63;64;65;65;54;48;40;14;17;18;22;33;1;12;Unpublished;Unpublished;Unpublished;Unpublished
Reviewed	O43556	SGCE	Epsilon-sarcoglycan	200	ERINAInITSAID	LGDFLGAVKNVWQPERLNAINITSALDRGGRVPLPINDLKE	Breast Cancer cell lines	2013	37
Reviewed	O43556	SGCE	Epsilon-sarcoglycan	200	NVWQPERLNAInITSALDR	LGDFLGAVKNVWQPERLNAINITSALDRGGRVPLPINDLKE	Non-small Cell Lung Carcinoma	2014	18
Reviewed	O43561	LAT	Linker for activation of T-cells family member 1	222	EYVnVSQELHPGAAK	NVPESGESAEASLDGSREYVNVSQELHPGAAKTEPAALSSQ	Jurkat T cell line;Platelet;Urine;Urine;Urine	2014;2015;2015;2015;2015;	13;Unpublished;Unpublished;Unpublished;Unpublished;Unpublished
Reviewed	O43566	RGS14	Regulator of G-protein signaling 14	93	EFSAEnVTFWK	QDPLGLAYFTEFLKKEFSAENVTFWKACERFQQIPASDTQQ	Prostate tumor;Ovarian tumor	2007;2007	Unpublished;Unpublished
Reviewed	O43567	RNF13	E3 ubiquitin-protein ligase RNF13	43	nASQTFDDLPAR	LFAFLNLLPVEADILAYNFENASQTFDDLPARFGYRLPAEG	Liver;OVCAR-3 cell line (Ovarian cancer)	2014;2015	33;1
Reviewed	O43567	RNF13	E3 ubiquitin-protein ligase RNF13	43	NFEnASQTFDDLPAR	LFAFLNLLPVEADILAYNFENASQTFDDLPARFGYRLPAEG	Liver;Prostate tumor;Breast tumor;Ovarian tumor	2014;2007;2007;2007	33;Unpublished;Unpublished;Unpublished
Reviewed	O43567	RNF13	E3 ubiquitin-protein ligase RNF13	43	NFEnASQTFDDLPARF	LFAFLNLLPVEADILAYNFENASQTFDDLPARFGYRLPAEG	Liver	2014	33
Reviewed	O43567	RNF13	E3 ubiquitin-protein ligase RNF13	43	DILAYNFEnASQTFDDLPAR	LFAFLNLLPVEADILAYNFENASQTFDDLPARFGYRLPAEG	Ovarian tumor	2015	Unpublished
Reviewed	O43567	RNF13	E3 ubiquitin-protein ligase RNF13	88	DnSSGTFIVIIR	LINSKPENACEPIVPPPVKDNSSGTFIVLIRRLDCNFDIKV	DLBCL cell lines (Diffuse large B-cell lymphoma)	2014	16
Reviewed	O43567	RNF13	E3 ubiquitin-protein ligase RNF13	88	DnSSGTFIVLIR	LINSKPENACEPIVPPPVKDNSSGTFIVLIRRLDCNFDIKV	prostate cancer cell lines;Urine;Liver;Breast cancer xenografts;Urine;Urine;Urine	2007;2013;2014;2015;2015;2015;2015;	72;45;33;Unpublished;Unpublished;Unpublished;Unpublished;Unpublished
Reviewed	O43570	CA12	Carbonic anhydrase 12	80	DASLTPLEFQGYnLSANK	LHSDILQYDASLTPLEFQGYNLSANKQFLLTNNGHSVKLNL	Prostate tumor;Breast tumor;Breast cancer cell lines;Ovarian tumor;Ovarian cancer cell lines	2007;2007;2007;2007;2007	Unpublished;Unpublished;Unpublished;Unpublished;Unpublished
Reviewed	O43570	CA12	Carbonic anhydrase 12	80	KYPSCGGLLQSPIDLHSDILQYDASLTPLEFQGYnLSANK	LHSDILQYDASLTPLEFQGYNLSANKQFLLTNNGHSVKLNL	Breast cell lines	2012	52
Reviewed	O43639	NCK2	Cytoplasmic protein NCK2	289	EWYYGnVTR	ISYTGPSSSGRFAGREWYYGNVTRHQAECALNERGVEGDFL	Urine;Urine	2015;2015;	Unpublished;Unpublished;Unpublished
Reviewed	O43653	PSCA	Prostate stem cell antigen	40	nCTQLGEQCWTAR	ALLCYSCKAQVSNEDCLQVENCTQLGEQCWTARIRAVGLLT	Urine	2007	Unpublished
Reviewed	O43653	PSCA	Prostate stem cell antigen	40	AQVSNEDCLQVEnCTQLGEQCWTAR	ALLCYSCKAQVSNEDCLQVENCTQLGEQCWTARIRAVGLLT	Breast cell lines;Urine;Urine;Prostate tumor	2012;2015;2015;2007	52;Unpublished
Reviewed	O43657	TSPAN6	Tetraspanin-6	134	KQYnSTGDY	FRHEIKNSFKNNYEKALKQYNSTGDYRSHAVDKIQNTLHCC	Liver	2014	33
Reviewed	O43657	TSPAN6	Tetraspanin-6	134	QYnSTGDYR	FRHEIKNSFKNNYEKALKQYNSTGDYRSHAVDKIQNTLHCC	Colorectal cancer cell line, HCT-116 (colorectal cancer);Breast cell lines;OVCAR-3 cell line (Ovarian cancer);HepG2 cell line (Liver);HEK293 cell line (embryonic kidney);Hela cell line (cervical cancer);Non-small Cell Lung Carcinoma;Colorectal tumor;Liver;Ovarian tumor;OVCAR-3 cell line (Ovarian cancer);LNCap/PC3 cell lines (Prostate cancer);Breast cancer xenografts;Prostate tumor;Urine;Urine;Ser…	2011;2012;2013;2013;2014;2014;2014;2014;2014;2015;2015;2015;2015;2015;2015;2015;2007;2007;2007	58;52;34;38;15;17;18;22;33;1;2;Unpublished;Unpublished;Unpublished
Reviewed	O43657	TSPAN6	Tetraspanin-6	134	ALKQYnSTGDYR	FRHEIKNSFKNNYEKALKQYNSTGDYRSHAVDKIQNTLHCC	prostate cancer cell lines;HeLa cell line (Cervical cancer);Colorectal cancer cell line, HCT-116 (colorectal cancer);OVCAR-3 cell line (Ovarian cancer);Prostate;HEK293 cell line (embryonic kidney);Liver;LNCap/PC3 cell lines (Prostate cancer);Prostate tumor;Urine;Urine;Hela cell line (cervical cancer)	2007;2009;2011;2013;2014;2014;2014;2015;2015;2015;2015;2015;	72;67;58;34;14;15;33;2;Unpublished;Unpublished;Unpublished;12;Unpublished
Reviewed	O43657	TSPAN6	Tetraspanin-6	134	EKALKQYnSTGDY	FRHEIKNSFKNNYEKALKQYNSTGDYRSHAVDKIQNTLHCC	Liver	2014	33
Reviewed	O43657	TSPAN6	Tetraspanin-6	134	KAIKQYnSTGDYR	FRHEIKNSFKNNYEKALKQYNSTGDYRSHAVDKIQNTLHCC	Breast Cancer cell lines	2013	37
Reviewed	O43657	TSPAN6	Tetraspanin-6	134	QYnSTGDYRSHAVDK	FRHEIKNSFKNNYEKALKQYNSTGDYRSHAVDKIQNTLHCC	HepG2 cell line (Liver);HuH-7 cell line (Liver)	2013;2013	38;38
Reviewed	O43660	PLRG1	Pleiotropic regulator 1	72	nATDSYVHK	YGPVLHMPTSKENLKEKGPQNATDSYVHKQYPANQGQEVEY	OVCAR-3 cell line (Ovarian cancer)	2015	1
Reviewed	O43663	PRC1	Protein regulator of cytokinesis 1	489	KLnTTTMSNATANSSIRPIFG	RTPSKRRGLAPNTPGKARKLNTTTMSNATANSSIRPIFGGT	Urine	2007	Unpublished
Reviewed	O43663	PRC1	Protein regulator of cytokinesis 1	495	KLNTTTMSnATANSSIRPIFG	RGLAPNTPGKARKLNTTTMSNATANSSIRPIFGGTVYHSPV	Urine	2007	Unpublished
Reviewed	O43663	PRC1	Protein regulator of cytokinesis 1	499	KLNTTTMSNATAnSSIRPIFG	PNTPGKARKLNTTTMSNATANSSIRPIFGGTVYHSPVSRLP	Urine	2007	Unpublished
Reviewed	O43663	PRC1	Protein regulator of cytokinesis 1	552	nGSILSGGYPGSAPLQR	SGKKTPRTGRHGANKENLELNGSILSGGYPGSAPLQRNFSI	OVCAR-3 cell line (Ovarian cancer)	2015	1
Reviewed	O43678	NDUFA2	NADH dehydrogenase [ubiquinone] 1 alpha subcomplex subunit 2	81	QETNVPLNnFSADQVTR	VQPKLWARYAFGQETNVPLNNFSADQVTRALENVLSGKA--	Urine;Urine;Prostate tumor	2007;2007;2007	Unpublished;Unpublished
Reviewed	O43679	LDB2	LIM domain-binding protein 2	262	KnSTSSTSNSSAGNNANSTGSKK	MVAPPAEPTRQPTTKRRKRKNSTSSTSNSSAGNNANSTGSK	Serum;Prostate cancer metastasis to liver	2007;2007	Unpublished;Unpublished
Reviewed	O43679	LDB2	LIM domain-binding protein 2	269	KNSTSSTSnSSAGNNANSTGSKK	PTRQPTTKRRKRKNSTSSTSNSSAGNNANSTGSKKKTTAAN	Serum;Prostate cancer metastasis to liver	2007;2007	Unpublished;Unpublished
Reviewed	O43679	LDB2	LIM domain-binding protein 2	277	KNSTSSTSNSSAGNNAnSTGSKK	RRKRKNSTSSTSNSSAGNNANSTGSKKKTTAANLSLSSQVP	Serum;Prostate cancer metastasis to liver	2007;2007	Unpublished;Unpublished
Reviewed	O43688	PPAP2C	Lipid phosphate phosphohydrolase 2	139	VnCSVYVQLEK	MIGRLRPNFLAVCDPDWSRVNCSVYVQLEKVCRGNPADVTE	IGROV-1/CP cell line (Ovarian cancer)IGROV-1/CP;Colorectal cancer cell line, HCT-116 (colorectal cancer);Pancreatic islets;Breast cell lines;Prostate;Colorectal tumor;Ovarian tumor;OVCAR-3 cell line (Ovarian cancer);LNCap/PC3 cell lines (Prostate cancer);Breast cancer xenografts;Hela cell line (cervical cancer);Prostate tumor;Ovarian tumor	2007;2011;2012;2012;2014;2014;2015;2015;2015;2015;2015;2007;2007	75;58;48;52;14;22;1;2;12;Unpublished;Unpublished
Reviewed	O43688	PPAP2C	Lipid phosphate phosphohydrolase 2	139	LRPNFLAVCDPDWSRVnCSVYVQLEK	MIGRLRPNFLAVCDPDWSRVNCSVYVQLEKVCRGNPADVTE	Colorectal cancer cell line, HCT-116 (colorectal cancer)	2011	58
Reviewed	O43699	SIGLEC6	Sialic acid-binding Ig-like lectin 6	103	RKnCSISIR	EEVQEETRGRFHLLWDPRRKNCSLSIRDARRRDNAAYFFRL	DLBCL cell lines (Diffuse large B-cell lymphoma)	2014	16
Reviewed	O43699	SIGLEC6	Sialic acid-binding Ig-like lectin 6	212	TTQSSVLTITPRPQDHSTnLTCQVTFPGAGVTMER	PRTTQSSVLTITPRPQDHSTNLTCQVTFPGAGVTMERTIQL	Breast cell lines	2012	52
Reviewed	O43699	SIGLEC6	Sialic acid-binding Ig-like lectin 6	233	TIQInVSYAPQK	LTCQVTFPGAGVTMERTIQLNVSYAPQKVAISIFQGNSAAF	DLBCL cell lines (Diffuse large B-cell lymphoma)	2014	16
Reviewed	O43699	SIGLEC6	Sialic acid-binding Ig-like lectin 6	233	TIQLnVSYAPQK	LTCQVTFPGAGVTMERTIQLNVSYAPQKVAISIFQGNSAAF	Breast cell lines	2012	52
Reviewed	O43699	SIGLEC6	Sialic acid-binding Ig-like lectin 6	258	IIQnTSSIPVIEGQAIR	PQKVAISIFQGNSAAFKILQNTSSLPVLEGQALRLLCDADG	DLBCL cell lines (Diffuse large B-cell lymphoma)	2014	16
Reviewed	O43699	SIGLEC6	Sialic acid-binding Ig-like lectin 6	258	ILQnTSSLPVLEGQALR	PQKVAISIFQGNSAAFKILQNTSSLPVLEGQALRLLCDADG	Breast cell lines	2012	52
Reviewed	O43707	ACTN4	Alpha-actinin-4	680	nGTLEDQLSHLK	VVGPWIQTKMEEIGRISIEMNGTLEDQLSHLKQYERSIVDY	OVCAR-3 cell line (Ovarian cancer)	2015	1
Reviewed	O43707	ACTN4	Alpha-actinin-4	680	ISIEMnGTLEDQLSHLK	VVGPWIQTKMEEIGRISIEMNGTLEDQLSHLKQYERSIVDY	Colorectal tumors;OVCAR-3 cell line (Ovarian cancer)	2009;2015	68;1
Reviewed	O43707	ACTN4	Alpha-actinin-4	726	HTnYTMEHIR	LLEQQHQLIQEALIFDNKHTNYTMEHIRVGWEQLLTTIART	Urine;Ovarian tumor;Urine;Urine;Urine;Prostate tumor	2007;2015;2015;2015;2007;2007	Unpublished;Unpublished
Reviewed	O43707	ACTN4	Alpha-actinin-4	821	IMSLVDPnHSGLVTFQAFIDFMSR	VENDRQGEAEFNRIMSLVDPNHSGLVTFQAFIDFMSRETTD	LNCap/PC3 cell lines (Prostate cancer)	2015	2
Reviewed	O43711	TLX3	T-cell leukemia homeobox protein 3	253	SLnDSIQPDPLCLHNSSLFALQNLQP	RQQASRLMLQLQHDAFQKSLNDSIQPDPLCLHNSSLFALQN	Serum;Prostate tumor	2007;2007	Unpublished;Unpublished
Reviewed	O43711	TLX3	T-cell leukemia homeobox protein 3	265	SLNDSIQPDPLCLHnSSLFALQNLQP	HDAFQKSLNDSIQPDPLCLHNSSLFALQNLQPWEEDSSKVP	Serum;Prostate tumor	2007;2007	Unpublished;Unpublished
Reviewed	O43731	KDELR3	ER lumen protein-retaining receptor 3	90	DSEnDTFR	CAYVTVYMIYGKFRKTFDSENDTFRLEFLLVPVIGLSFLEN	Urine;Urine;Prostate tumor	2007;2007;2007	Unpublished;Unpublished
Reviewed	O43736	ITM2A	Integral membrane protein 2A	166	PLnTSIVMPPK	EKGMTAYLDLLLGNCYLMPLNTSIVMPPKNLVELFGKLASG	Pancreatic islets	2012	48
Reviewed	O43739	CYTH3	Cytohesin-3	112	GEGLnKTVIGDYLGER	DLLQSSPEDVAQFLYKGEGLNKTVIGDYLGERDEFNIKVLQ	OVCAR-3 cell line (Ovarian cancer)	2015	1
Reviewed	O43809	NUDT21	Cleavage and polyadenylation specificity factor subunit 5	7	SVVPPnRSQTGWPRGVTQFGNK	--------------MSVVPPNRSQTGWPRGVTQFGNKYIQQ	Colorectal tumors	2009	68
Reviewed	O43809	NUDT21	Cleavage and polyadenylation specificity factor subunit 5	44	nYTFGTK	YIQQTKPLTLERTINLYPLTNYTFGTKEPLYEKDSSVAARF	OVCAR-3 cell line (Ovarian cancer)	2015	1
Reviewed	O43815	STRN	Striatin	207	nGTEAEVK	LGFSSDVTDREDDKNQDSVVNGTEAEVKETAMIAKSELTDS	OVCAR-3 cell line (Ovarian cancer)	2015	1
Reviewed	O43815	STRN	Striatin	207	NQDSVVnGTE	LGFSSDVTDREDDKNQDSVVNGTEAEVKETAMIAKSELTDS	Urine;Urine;Prostate tumor	2007;2007;2007	Unpublished;Unpublished
Reviewed	O43815	STRN	Striatin	299	EFDFLVTSEEGDnESR	RDTKEALKEFDFLVTSEEGDNESRSAGDGTDWEKEDQCLMP	Prostate tumor;Breast tumor	2007;2007	Unpublished;Unpublished
Reviewed	O43815	STRN	Striatin	662	nSSCQINR	FNMETQQRILTLESNVDTTANSSCQINRVISHPTLPISITA	OVCAR-3 cell line (Ovarian cancer)	2015	1
Reviewed	O43815	STRN	Striatin	693	HIKFYDnNTGK	HPTLPISITAHEDRHIKFYDNNTGKLIHSMVAHLEAVTSLA	Serum	2007	Unpublished
Reviewed	O43820	HYAL3	Hyaluronidase-3	69	nMTLF	HLPLNALGIIANRGQHFHGQNMTIFYKNQLGLYPYFGPRGT	Liver	2014	33
Reviewed	O43820	HYAL3	Hyaluronidase-3	348	LnVTR	EEECWHLHDYLVDTLGPYVINVTRAAMACSHQRCHGHGRCA	Liver;Prostate tumor	2014;2007	33;Unpublished
Reviewed	O43825	B3GALT2	Beta-1,3-galactosyltransferase 2	176	nESLAPGIQITR	LIAAEPGQIEARRAIRQTWGNESLAPGIQITRIFLLGLSIK	OVCAR-3 cell line (Ovarian cancer)	2015	1
Reviewed	O43827	ANGPTL7	Angiopoietin-related protein 7	58	IKAQVAnISSIIS	PQLKAANCCEEVKELKAQVANLSSLLSELNKKQERDWVSVV	Breast Cancer cell lines	2013	37
Reviewed	O43827	ANGPTL7	Angiopoietin-related protein 7	253	YRIFIGnYTGNVG	AEYSHFVLGNELNSYRLFLGNYTGNVGNDALQYHNNTAFST	Breast Cancer cell lines	2013	37
Reviewed	O43827	ANGPTL7	Angiopoietin-related protein 7	253	LFLGnYTGNVGNDALQYHNNTAFSTK	AEYSHFVLGNELNSYRLFLGNYTGNVGNDALQYHNNTAFST	Serum;Prostate tumor;Cerebrospinal fluid	2007;2007;2007	Unpublished;Unpublished;Unpublished
Reviewed	O43827	ANGPTL7	Angiopoietin-related protein 7	267	DAIQYHnNTAFST	YRLFLGNYTGNVGNDALQYHNNTAFSTKDKDNDNCLDKCAQ	Breast Cancer cell lines	2013	37
Reviewed	O43827	ANGPTL7	Angiopoietin-related protein 7	267	LFLGNYTGNVGNDALQYHnNTAFSTK	YRLFLGNYTGNVGNDALQYHNNTAFSTKDKDNDNCLDKCAQ	Serum;Prostate tumor;Cerebrospinal fluid	2007;2007;2007	Unpublished;Unpublished;Unpublished
Reviewed	O43852	CALU	Calumenin	131	KnATYGY	RQWKGHDLNEDGLVSWEEYKNATYGYVLDDPDPDDGFNYKQ	Liver	2014	33
Reviewed	O43852	CALU	Calumenin	131	nATYGYVLD	RQWKGHDLNEDGLVSWEEYKNATYGYVLDDPDPDDGFNYKQ	Liver;Liver	2014;2014	19;33
Reviewed	O43852	CALU	Calumenin	131	EEYKnATYGY	RQWKGHDLNEDGLVSWEEYKNATYGYVLDDPDPDDGFNYKQ	Liver	2014	33
Reviewed	O43852	CALU	Calumenin	131	YKnATYGYVLDD	RQWKGHDLNEDGLVSWEEYKNATYGYVLDDPDPDDGFNYKQ	Liver	2014	33
Reviewed	O43852	CALU	Calumenin	131	SWEEYKnATYGYV	RQWKGHDLNEDGLVSWEEYKNATYGYVLDDPDPDDGFNYKQ	Breast Cancer cell lines	2013	37
Reviewed	O43852	CALU	Calumenin	131	DLNEDGLVSWEEYKnATY	RQWKGHDLNEDGLVSWEEYKNATYGYVLDDPDPDDGFNYKQ	Liver	2014	33
Reviewed	O43852	CALU	Calumenin	131	DLNEDGLVSWEEYKnATYGY	RQWKGHDLNEDGLVSWEEYKNATYGYVLDDPDPDDGFNYKQ	Liver	2014	33
Reviewed	O43852	CALU	Calumenin	131	GHDLNEDGLVSWEEYKnATY	RQWKGHDLNEDGLVSWEEYKNATYGYVLDDPDPDDGFNYKQ	Liver	2014	33
Reviewed	O43852	CALU	Calumenin	131	nATYGYVIDDPDPDDGFNYK	RQWKGHDLNEDGLVSWEEYKNATYGYVLDDPDPDDGFNYKQ	DLBCL cell lines (Diffuse large B-cell lymphoma)	2014	16
Reviewed	O43852	CALU	Calumenin	131	nATYGYVLDDPDPDDGFNYK	RQWKGHDLNEDGLVSWEEYKNATYGYVLDDPDPDDGFNYKQ	prostate cancer cell lines;IGROV-1/CP cell line (Ovarian cancer)IGROV-1/CP;FTC-133 Cell Line (Thyroid Cance);XTC-1 Cell Line (Thyroid Cance);HCCLM3 cell line (Liver);Liver;Plasma;ovarian tumor;HEK293T cell line (embryonic kidney);Pancreatic islets;22Rv1 cell xenograft (prostate cancer);Breast cell lines;OVCAR-3 cell line (Ovarian cancer);SKOV-3 cell line (Ovarian cancer);Ovarian tumor;HuH-7 cell …	2007;2007;2009;2009;2009;2009;2009;2011;2011;2012;2012;2012;2013;2013;2013;2013;2013;2014;2014;2014;2014;2014;2015;2015;2015;2015;2015;2015;2007;2007;2007;2007	72;75;62;62;63;64;66;54;57;48;50;52;34;34;34;38;40;13;14;15;22;33;1;2;12;Unpublished;Unpublished;Unpublished;Unpublished
Reviewed	O43852	CALU	Calumenin	131	KGHDLNEDGLVSWEEYKnATY	RQWKGHDLNEDGLVSWEEYKNATYGYVLDDPDPDDGFNYKQ	Liver	2014	33
Reviewed	O43852	CALU	Calumenin	131	GHDLNEDGLVSWEEYKnATYGY	RQWKGHDLNEDGLVSWEEYKNATYGYVLDDPDPDDGFNYKQ	Pancreatic islets	2012	48
Reviewed	O43852	CALU	Calumenin	131	YKnATYGYVLDDPDPDDGFNYK	RQWKGHDLNEDGLVSWEEYKNATYGYVLDDPDPDDGFNYKQ	Liver	2014	33
Reviewed	O43852	CALU	Calumenin	131	EYKnATYGYVLDDPDPDDGFNYK	RQWKGHDLNEDGLVSWEEYKNATYGYVLDDPDPDDGFNYKQ	Liver	2014	33
Reviewed	O43852	CALU	Calumenin	131	KGHDLNEDGLVSWEEYKnATYGY	RQWKGHDLNEDGLVSWEEYKNATYGYVLDDPDPDDGFNYKQ	Liver	2014	33
Reviewed	O43852	CALU	Calumenin	131	GHDLNEDGLVSWEEYKnATYGYVL	RQWKGHDLNEDGLVSWEEYKNATYGYVLDDPDPDDGFNYKQ	IGROV-1/CP cell line (Ovarian cancer)IGROV-1/CP	2007	75
Reviewed	O43852	CALU	Calumenin	131	GHDLNEDGLVSWEEYKnATYGYVLD	RQWKGHDLNEDGLVSWEEYKNATYGYVLDDPDPDDGFNYKQ	IGROV-1/CP cell line (Ovarian cancer)IGROV-1/CP	2007	75
Reviewed	O43852	CALU	Calumenin	131	nATYGYVLDDPDPDDGFNYKQMMVR	RQWKGHDLNEDGLVSWEEYKNATYGYVLDDPDPDDGFNYKQ	Liver	2014	33
Reviewed	O43852	CALU	Calumenin	131	GHDLNEDGLVSWEEYKnATYGYVLDD	RQWKGHDLNEDGLVSWEEYKNATYGYVLDDPDPDDGFNYKQ	IGROV-1/CP cell line (Ovarian cancer)IGROV-1/CP	2007	75
Reviewed	O43852	CALU	Calumenin	131	GHDLNEDGLVSWEEYKnATYGYVLDDPDPDDGFNYK	RQWKGHDLNEDGLVSWEEYKNATYGYVLDDPDPDDGFNYKQ	DRO-1 Cell Line (Thyroid Cance);Pancreatic islets;OVCAR-3 cell line (Ovarian cancer);Ovarian tumor;Liver;Ovarian tumor;OVCAR-3 cell line (Ovarian cancer);Platelet;LNCap/PC3 cell lines (Prostate cancer);Hela cell line (cervical cancer)	2009;2012;2013;2013;2014;2015;2015;2015;2015;2015	62;48;34;34;33;Unpublished;1;Unpublished;2;12
Reviewed	O43854	EDIL3	EGF-like repeat and discoidin I-like domain-containing protein 3	140	NGGICTDLVAnYSCECPGEFMGR	INECEVEPCKNGGICTDLVANYSCECPGEFMGRNCQYKCSG	TPC-1 Cell Line (Thyroid Cance);Pancreatic islets	2009;2012	62;48
Reviewed	O43868	SLC28A2	Sodium/nucleoside cotransporter 2	600	GAEADCVSFPnTSFTNR	CMAGILYVPRGAEADCVSFPNTSFTNRTYETYMCCRGLFQS	Colorectal tumor	2014	22
Reviewed	O43868	SLC28A2	Sodium/nucleoside cotransporter 2	605	GAEADCVSFPNTSFTnR	LYVPRGAEADCVSFPNTSFTNRTYETYMCCRGLFQSTSLNG	Colorectal tumor	2014	22
Reviewed	O43889	CREB3	Cyclic AMP-responsive element-binding protein 3	372	GPIIPIQAnITR	PFPDLFSEPLCRGPILPLQANLTRKGGWLPTGSPSVILQDR	DLBCL cell lines (Diffuse large B-cell lymphoma)	2014	16
Reviewed	O43889	CREB3	Cyclic AMP-responsive element-binding protein 3	372	GPILPLQAnLTR	PFPDLFSEPLCRGPILPLQANLTRKGGWLPTGSPSVILQDR	Jurkat T cell line	2014	13
Reviewed	O43895	XPNPEP2	Xaa-Pro aminopeptidase 2	65	RQQMQTQnLSAY	VTVVNTTMSLTALRQQMQTQNLSAYIIPGTDAHMNEYIGQH	Liver	2014	33
Reviewed	O43895	XPNPEP2	Xaa-Pro aminopeptidase 2	65	QQMQTQnLSAYIIPGTDAHMNE	VTVVNTTMSLTALRQQMQTQNLSAYIIPGTDAHMNEYIGQH	Liver	2014	33
Reviewed	O43895	XPNPEP2	Xaa-Pro aminopeptidase 2	65	QQMQTQnISAYIIPGTDAHMNEYIGQHDER	VTVVNTTMSLTALRQQMQTQNLSAYIIPGTDAHMNEYIGQH	Liver	2014	32
Reviewed	O43895	XPNPEP2	Xaa-Pro aminopeptidase 2	65	QQMQTQnLSAYIIPGTDAHMNEYIGQHDER	VTVVNTTMSLTALRQQMQTQNLSAYIIPGTDAHMNEYIGQH	Urine;Liver;Urine;Urine;Urine;Urine;Prostate tumor	2007;2014;2015;2015;2015;2007;2007	33;Unpublished;Unpublished
Reviewed	O43895	XPNPEP2	Xaa-Pro aminopeptidase 2	291	FSSETLSYLnSSCTGPMCVQIEDYSQVR	SSIRLFANKSRFSSETLSYLNSSCTGPMCVQIEDYSQVRDS	Urine;Urine	2015;2015;	Unpublished;Unpublished;Unpublished
Reviewed	O43897	TLL1	Tolloid-like protein 1	125	IGFGLEQnNTVK	RGALYQLIDRIRRIGFGLEQNNTVKGKVPLQFSGQNEKNRV	HCC cell lines (Liver)	2013	40
Reviewed	O43897	TLL1	Tolloid-like protein 1	125	GFGIEQnNTVKGK	RGALYQLIDRIRRIGFGLEQNNTVKGKVPLQFSGQNEKNRV	Breast Cancer cell lines	2013	37
Reviewed	O43897	TLL1	Tolloid-like protein 1	169	IGGnFTGSQR	ATSRTERIWPGGVIPYVIGGNFTGSQRAMFKQAMRHWEKHT	Pancreatic islets	2012	48
Reviewed	O43897	TLL1	Tolloid-like protein 1	169	VIGGnFTGSQR	ATSRTERIWPGGVIPYVIGGNFTGSQRAMFKQAMRHWEKHT	Pancreatic islets;Ovarian tumor;Prostate tumor;Ovarian tumor	2012;2015;2007;2007	48;Unpublished;Unpublished
Reviewed	O43897	TLL1	Tolloid-like protein 1	390	IVLnFTTMDLYK	PSYTHCIWRVSVTPGEKIVLNFTTMDLYKSSLCWYDYIEVR	HCC cell lines (Liver);LNCap/PC3 cell lines (Prostate cancer)	2013;2015	40;2
Reviewed	O43897	TLL1	Tolloid-like protein 1	390	GEKIVInFTTMDI	PSYTHCIWRVSVTPGEKIVLNFTTMDLYKSSLCWYDYIEVR	Breast Cancer cell lines	2013	37
Reviewed	O43897	TLL1	Tolloid-like protein 1	626	LnGTITTPGWPK	ELGPDRRSCEAACGGLLTKLNGTITTPGWPKEYPPNKNCVW	HCC cell lines (Liver)	2013	40
Reviewed	O43897	TLL1	Tolloid-like protein 1	626	GIITKInGTITTP	ELGPDRRSCEAACGGLLTKLNGTITTPGWPKEYPPNKNCVW	Breast Cancer cell lines	2013	37
Reviewed	O43909	EXTL3	Exostosin-like 3	277	LLnLSR	EKQLYSLPHWRTDGHNHVIINLSRKSDTQNLLYNVSTGRAM	HCC cell lines (Liver)	2013	40
Reviewed	O43909	EXTL3	Exostosin-like 3	290	SDTQNLLYnVSTGR	GHNHVIINLSRKSDTQNLLYNVSTGRAMVAQSTFYTVQYRP	Breast cancer xenografts	2015	Unpublished
Reviewed	O43909	EXTL3	Exostosin-like 3	290	KSDTQNIIYnVSTGR	GHNHVIINLSRKSDTQNLLYNVSTGRAMVAQSTFYTVQYRP	DLBCL cell lines (Diffuse large B-cell lymphoma)	2014	16
Reviewed	O43909	EXTL3	Exostosin-like 3	290	KSDTQNLLYnVSTGR	GHNHVIINLSRKSDTQNLLYNVSTGRAMVAQSTFYTVQYRP	Pancreatic islets; Jurkat T cell line;HEK293 cell line (embryonic kidney);Liver;Ovarian tumor;OVCAR-3 cell line (Ovarian cancer);LNCap/PC3 cell lines (Prostate cancer);Breast cancer xenografts;Hela cell line (cervical cancer)	2012;2014;2014;2014;2015;2015;2015;2015;2015	48;13;15;33;Unpublished;1;2;Unpublished;12
Reviewed	O43909	EXTL3	Exostosin-like 3	592	nFTLTVTDFYR	DLDLGPVETEPPYASPRYLRNFTLTVTDFYRSWNCAPGPFH	Breast cancer xenografts	2015	Unpublished
Reviewed	O43921	EFNA2	Ephrin-A2	42	YAVYWnR	PFARAEDAARANSDRYAVYWNRSNPRFHAGAGDDGGGYTVE	Urine; HCC cell lines (Liver);Urine;DLBCL cell lines (Diffuse large B-cell lymphoma);Urine;Urine;Urine;Prostate tumor	2007;2013;2013;2014;2015;2015;2007;2007	40;45;16;Unpublished;Unpublished
Reviewed	O43921	EFNA2	Ephrin-A2	174	VYVRPTnETL	TPPNAVDRPCLRLKVYVRPTNETLYEAPEPIFTSNNSCSSP	Urine;Urine;Prostate tumor	2007;2007;2007	Unpublished;Unpublished
Reviewed	O43929	ORC4	Origin recognition complex subunit 4	271	HFnISKNLR	ENVQYLSEDRSVQEVLQKHFNISKNLRSLHMLLMLALNRVT	Sample information lost	2007	Unpublished
Reviewed	O43933	PEX1	Peroxisome biogenesis factor 1	1268	RKnQSGTMFRPG	DDWKNFAELYESFQNPKRRKNQSGTMFRPGQKVTLA-----	Sample information lost	2007	Unpublished
Reviewed	O43934	MFSD11	UNC93-like protein MFSD11	213	MEVnESAQNNLTK	PDSENVLGEDESSDDQDMEVNESAQNNLTKAVDAFKKSFKL	Urine;Urine;Prostate tumor	2007;2007;2007	Unpublished;Unpublished
Reviewed	O43934	MFSD11	UNC93-like protein MFSD11	219	MEVNESAQNnLTK	LGEDESSDDQDMEVNESAQNNLTKAVDAFKKSFKLCVTKEM	Urine;Urine;Prostate tumor	2007;2007;2007	Unpublished;Unpublished
Reviewed	O60229	KALRN	Kalirin	914	NGESMLnASLVNASSLSEAEQLQR	HLQAEVKQVLGWIRNGESMLNASLVNASSLSEAEQLQREHE	Serum;Prostate tumor	2007;2007	Unpublished;Unpublished
Reviewed	O60229	KALRN	Kalirin	919	NGESMLNASLVnASSLSEAEQLQR	VKQVLGWIRNGESMLNASLVNASSLSEAEQLQREHEQFQLA	Serum;Prostate tumor	2007;2007	Unpublished;Unpublished
Reviewed	O60241	ADGRB2	Adhesion G protein-coupled receptor B2	192	nSSQFTCGVLCR	LLAPAALAFRFVEVLLINNNNSSQFTCGVLCRWSEECGRAA	OVCAR-3 cell line (Ovarian cancer)	2015	1
Reviewed	O60242	ADGRB3	Adhesion G protein-coupled receptor B3	82	KDLSCSnFSLLAYQFDHFSHEKIK	PDPTKYSIYLKFSKKDLSCSNFSLLAYQFDHFSHEKIKDLL	Serum;Prostate tumor;Ovarian tumor	2007;2007;2007	Unpublished;Unpublished;Unpublished
Reviewed	O60242	ADGRB3	Adhesion G protein-coupled receptor B3	1456	FRDIPnTSSMENPAPNK	ELFQELNQKFQTLDRFRDIPNTSSMENPAPNKNPWDTFKNP	Serum;Prostate tumor	2007;2007	Unpublished;Unpublished
Reviewed	O60243	HS6ST1	Heparan-sulfate 6-O-sulfotransferase 1	264	nLSFIPEGK	NLANNRQVRMLADLSLVGCYNLSFIPEGKRAQLLLESAKKN	OVCAR-3 cell line (Ovarian cancer)	2015	1
Reviewed	O60243	HS6ST1	Heparan-sulfate 6-O-sulfotransferase 1	320	FIRPFMQYnSTR	TQYLFERTFNLKFIRPFMQYNSTRAGGVEVDEDTIRRIEEL	Urine;HuH-7 cell line (Liver)Jurkat T cell line;Urine;Prostate tumor	2007;2013;2014;2007;2007	38;13;Unpublished;Unpublished
Reviewed	O60243	HS6ST1	Heparan-sulfate 6-O-sulfotransferase 1	320	RPFMQYnSTRAGG	TQYLFERTFNLKFIRPFMQYNSTRAGGVEVDEDTIRRIEEL	Breast Cancer cell lines	2013	37
Reviewed	O60244	MED14	Mediator of RNA polymerase II transcription subunit 14	428	LQELKAILRGFNANEnSSIE	RAHQKLQELKAILRGFNANENSSIETALPALVVPILEPCGN	Urine	2007	Unpublished
Reviewed	O60245	PCDH7	Protocadherin-7	79	EYIKIDnITGEIS	TGSGEVTFSLESGSEYLKIDNLTGELSTSERRIDREKLPQC	Breast Cancer cell lines	2013	37
Reviewed	O60245	PCDH7	Protocadherin-7	79	IDnLTGELSTSER	TGSGEVTFSLESGSEYLKIDNLTGELSTSERRIDREKLPQC	Urine;HCCLM3 cell line (Liver);Pancreatic islets; HCC cell lines (Liver);Prostate;Colorectal tumor;Ovarian tumor;Breast cancer xenografts;Prostate tumor;Urine;Urine;Urine;Prostate tumor;Ovarian tumor	2007;2009;2012;2013;2014;2014;2015;2015;2015;2015;2015;2007;2007;2007	63;48;40;14;22;Unpublished;Unpublished;Unpublished
Reviewed	O60245	PCDH7	Protocadherin-7	518	nNSLIVK	TREFNVVIVAVDSGSPSLSSNNSLIVKVGDTNDNPPMFGQS	OVCAR-3 cell line (Ovarian cancer)	2015	1
Reviewed	O60245	PCDH7	Protocadherin-7	518	EFNVVIVAVDSGSPSLSSnNSLIVK	TREFNVVIVAVDSGSPSLSSNNSLIVKVGDTNDNPPMFGQS	Ovarian tumor	2015	Unpublished
Reviewed	O60245	PCDH7	Protocadherin-7	780	nYSIVGGNPFK	RTVVATVLATDSDDGINADLNYSIVGGNPFKLFEIDPTSGV	OVCAR-3 cell line (Ovarian cancer)	2015	1
Reviewed	O60245	PCDH7	Protocadherin-7	822	LVVQVnDSGQPSQSTTTLVHVFVNESVSNATAIDSQIAR	SLVGKLTQKHYGLHRLVVQVNDSGQPSQSTTTLVHVFVNES	Ovarian tumor	2015	Unpublished
Reviewed	O60245	PCDH7	Protocadherin-7	840	LVVQVNDSGQPSQSTTTLVHVFVnESVSNATAIDSQIAR	QVNDSGQPSQSTTTLVHVFVNESVSNATAIDSQIARSLHIP	Ovarian tumor	2015	Unpublished
Reviewed	O60245	PCDH7	Protocadherin-7	845	nATAIDSQIAR	GQPSQSTTTLVHVFVNESVSNATAIDSQIARSLHIPLTQDI	OVCAR-3 cell line (Ovarian cancer)	2015	1
Reviewed	O60245	PCDH7	Protocadherin-7	845	LVVQVNDSGQPSQSTTTLVHVFVNESVSnATAIDSQIAR	GQPSQSTTTLVHVFVNESVSNATAIDSQIARSLHIPLTQDI	Ovarian tumor	2015	Unpublished
Reviewed	O60256	PRPSAP2	Phosphoribosyl pyrophosphate synthase-associated protein 2	28	nSSCMELSK	ELETKMNITKGGLVLFSANSNSSCMELSKKIAERLGVEMGK	OVCAR-3 cell line (Ovarian cancer)	2015	1
Reviewed	O60271	SPAG9	C-Jun-amino-terminal kinase-interacting protein 4	694	LWCAVGVnLSGGKTR	YLRPLDEKDTSMKLWCAVGVNLSGGKTRDGGSVVGASVFYK	Sample information lost	2007	Unpublished
Reviewed	O60279	SUSD5	Sushi domain-containing protein 5	47	nGSQGLQLEAAR	LGLPRLSVRADGKFFVLESQNGSQGLQLEAARLSCKSRGAH	OVCAR-3 cell line (Ovarian cancer)	2015	1
Reviewed	O60279	SUSD5	Sushi domain-containing protein 5	47	VLESQnGSQGLQLEAARL	LGLPRLSVRADGKFFVLESQNGSQGLQLEAARLSCKSRGAH	Liver	2014	33
Reviewed	O60279	SUSD5	Sushi domain-containing protein 5	47	FFVLESQnGSQGLQLEAAR	LGLPRLSVRADGKFFVLESQNGSQGLQLEAARLSCKSRGAH	Urine;Urine;Urine	2015;2015;2015;	Unpublished;Unpublished;Unpublished;Unpublished
Reviewed	O60279	SUSD5	Sushi domain-containing protein 5	354	GPFVGKnDSKAGD	PETKVIYGNTDGPSGPFVGKNDSKAGDPVVSSSDESWLDGY	Breast Cancer cell lines	2013	37
Reviewed	O60279	SUSD5	Sushi domain-containing protein 5	354	VIYGNTDGPSGPFVGKnDSK	PETKVIYGNTDGPSGPFVGKNDSKAGDPVVSSSDESWLDGY	Urine;Urine;Urine;Urine;Urine;Urine;Prostate tumor	2007;2013;2015;2015;2015;2007;2007	45;Unpublished;Unpublished
Reviewed	O60282	KIF5C	Kinesin heavy chain isoform 5C	79	nGTIFAYGQTSSGK	QEQVYNACAKQIVKDVLEGYNGTIFAYGQTSSGKTHTMEGK	OVCAR-3 cell line (Ovarian cancer)	2015	1
Reviewed	O60284	ST18	Suppression of tumorigenicity 18 protein	111	LSTAQEnSSRK	TAEEIMIKPMDESLLSTAQENSSRKEDRYSCYQELMVKSLM	Urine	2007	Unpublished
Reviewed	O60284	ST18	Suppression of tumorigenicity 18 protein	611	nGTLDLSMK	ILSNKPQSLHAKGAEIEVDENGTLDLSMKKNRILDKSAPLT	OVCAR-3 cell line (Ovarian cancer)	2015	1
Reviewed	O60287	URB1	Nucleolar pre-ribosomal-associated protein 1	1969	nETVLSTK	VLRYRATVIQAFRDMNRFTVNETVLSTKDVLVLLHKWSLIE	OVCAR-3 cell line (Ovarian cancer)	2015	1
Reviewed	O60292	SIPA1L3	Signal-induced proliferation-associated 1-like protein 3	367	nTTTGASAASAA	SMLFDLNEAAANRVSVSQRRNTTTGASAASAASAMASLTAS	Urine;Urine;Prostate tumor	2007;2007;2007	Unpublished;Unpublished
Reviewed	O60292	SIPA1L3	Signal-induced proliferation-associated 1-like protein 3	470	TnASISVLEVPK	GSPSSGEGHLAEPALSAYRTNASISVLEVPKEQQRTQSRPR	Prostate tumor	2007	Unpublished
Reviewed	O60293	ZFC3H1	Zinc finger C3H1 domain-containing protein	1270	MSMDQMAVLLVSNInESK	GVNKDRMSMDQMAVLLVSNINESKGHTPPFTTYKDKRKWKP	Serum	2013	42
Reviewed	O60309	LRRC37A3	Leucine-rich repeat-containing protein 37A3	864	QVPVPEPNTHnGTFTIINFQGNYISYIDGNVWK	IDLNPEQRLRQVPVPEPNTHNGTFTILNFQGNYISYIDGNV	Spermatozoa	2013	43
Reviewed	O60309	LRRC37A3	Leucine-rich repeat-containing protein 37A3	900	IIIRENnITEIHK	IDGNVWKAYSWTEKLILRENNLTELHKDSFEGLLSLQYLDL	Spermatozoa	2013	43
Reviewed	O60309	LRRC37A3	Leucine-rich repeat-containing protein 37A3	900	IIIRENnITEIHKDSFEGIISIQYIDISCNK	IDGNVWKAYSWTEKLILRENNLTELHKDSFEGLLSLQYLDL	Spermatozoa	2013	43
Reviewed	O60309	LRRC37A3	Leucine-rich repeat-containing protein 37A3	943	FInLSCNVIT	NKIQSIERHTFEPLPFLKFINLSCNVITELSFGTFQAWHGM	Urine;Urine;Prostate tumor	2007;2007;2007	Unpublished;Unpublished
Reviewed	O60309	LRRC37A3	Leucine-rich repeat-containing protein 37A3	1053	IHCNSACITnTTHCPEEASVGNPEGAFMK	NSIEAVCKTVKLHCNSACLTNTTHCPEEASVGNPEGAFMKV	Spermatozoa	2013	43
Reviewed	O60309	LRRC37A3	Leucine-rich repeat-containing protein 37A3	1553	IEWDTDQWKTENYInESTEAQSEQKEK	EVKASKIEWDTDQWKTENYINESTEAQSEQKEKSLEFTKEL	Spermatozoa	2013	43
Reviewed	O60312	ATP10A	Probable phospholipid-transporting ATPase VA	291	ALLnNSGPR	NTDAVVGIVIYAGHETKALLNNSGPRYKRSKLERQMNCDVL	Breast cancer xenografts	2015	Unpublished
Reviewed	O60312	ATP10A	Probable phospholipid-transporting ATPase VA	413	ALnITEDLGQIQY	NQDMQLYDEETDSQLQCRALNITEDLGQIQYIFSDKTGTLT	Urine	2007	Unpublished
Reviewed	O60313	OPA1	Dynamin-like 120 kDa protein, mitochondrial	650	GTFnTTVDIK	THVIENIYLPAAQTMNSGTFNTTVDIKLKQWTDKQLPNKAV	Urine;Urine;Prostate tumor	2007;2007;2007	Unpublished;Unpublished
Reviewed	O60315	ZEB2	Zinc finger E-box-binding homeobox 2	861	ASSISLDHNSVSSSSENSDEPLnLTFIK	SISLDHNSVSSSSENSDEPLNLTFIKKEFSNSNNLDNKSTN	Urine;Urine;Prostate tumor	2007;2007;2007	Unpublished;Unpublished
Reviewed	O60318	MCM3AP	Germinal-center associated nuclear protein	381	GFVESAESDHMAIPGGnQSVLAPSR	KKETGFVESAESDHMAIPGGNQSVLAPSRIPGVNKEEETES	Prostate tumor;Breast tumor	2007;2007	Unpublished;Unpublished
Reviewed	O60330	PCDHGA12	Protocadherin gamma-A12	419	YnITVTATDR	GNYYSLVTDIVLDREQVPSYNITVTATDRGTPPLSTETHIS	Liver	2014	33
Reviewed	O60330	PCDHGA12	Protocadherin gamma-A12	901	QNVYIPGSnATLTNAAGKR	PQFTLQHVPDYRQNVYIPGSNATLTNAAGKRDGKAPAGGNG	Prostate tumor;Breast tumor	2007;2007	Unpublished;Unpublished
Reviewed	O60333	KIF1B	Kinesin-like protein KIF1B	232	KHDnETNLSTEK	ETSSRSHAVFTIVFTQKKHDNETNLSTEKVSKISLVDLAGS	Serum;Prostate tumor	2007;2007	Unpublished;Unpublished
Reviewed	O60333	KIF1B	Kinesin-like protein KIF1B	235	KHDNETnLSTEK	SRSHAVFTIVFTQKKHDNETNLSTEKVSKISLVDLAGSERA	Serum;Prostate tumor	2007;2007	Unpublished;Unpublished
Reviewed	O60341	KDM1A	Lysine-specific histone demethylase 1A	33	nGSEVAAQPAGLSGPAEVGPGAVGER	AAAAAATGTEAGPGTAGGSENGSEVAAQPAGLSGPAEVGPG	OVCAR-3 cell line (Ovarian cancer)	2015	1
Reviewed	O60341	KDM1A	Lysine-specific histone demethylase 1A	33	AAAAAAAAAAAATGTEAGPGTAGGSEnGSEVAAQPAGLSGPAEVGPGAVGER	AAAAAATGTEAGPGTAGGSENGSEVAAQPAGLSGPAEVGPG	Liver	2014	33
Reviewed	O60344	ECE2	Endothelin-converting enzyme 2	384	DYYLnR	SNVIQVDQSGLFLPSRDYYLNRTANEKVLTAYLDYMEELGM	Breast cancer xenografts	2015	Unpublished
Reviewed	O60344	ECE2	Endothelin-converting enzyme 2	429	AnITVPQDQR	RPTSTREQMQQVLELEIQLANITVPQDQRRDEEKIYHKMSI	Pancreatic islets	2012	48
Reviewed	O60344	ECE2	Endothelin-converting enzyme 2	429	IQLAnITVPQDQR	RPTSTREQMQQVLELEIQLANITVPQDQRRDEEKIYHKMSI	Pancreatic islets	2012	48
Reviewed	O60346	PHLPP1	PH domain leucine-rich repeat-containing protein phosphatase 1	64	nGSGSGAR	AAGGGRSPEPALTPAAPSGGNGSGSGAREEAPGEAPPGPLP	OVCAR-3 cell line (Ovarian cancer)	2015	1
Reviewed	O60353	FZD6	Frizzled-6	38	MAYnMTFFPNLM	GHSLFTCEPITVPRCMKMAYNMTFFPNLMGHYDQSIAAVEM	Serum;Prostate tumor;Ovarian tumor	2007;2007;2007	Unpublished;Unpublished;Unpublished
Reviewed	O60383	GDF9	Growth/differentiation factor 9	236	RSIHMSInFTCMK	VTSLLQPLVASNKRSIHMSINFTCMKDQLEHPSAQNGLFNM	Prostate tumor;Ovarian tumor	2007;2007	Unpublished;Unpublished
Reviewed	O60449	LY75	Lymphocyte antigen 75	135	DGHGTAISnASDVWK	LYGAARYRLALKDGHGTAISNASDVWKKGGSEESLCDQPYH	Urine;Pancreatic islets;Breast cell linesJurkat T cell line;Colorectal tumor;Liver;Ovarian tumor;Platelet;Breast cancer xenografts;Urine;Urine;Urine;Plasma;Urine;Prostate tumor;Lymphocytes	2007;2012;2012;2014;2014;2014;2015;2015;2015;2015;2015;2015;2015;2007;2007;2007	48;52;13;22;33;8;Unpublished;Unpublished;Unpublished
Reviewed	O60449	LY75	Lymphocyte antigen 75	135	DGHGTAISnASDVWKK	LYGAARYRLALKDGHGTAISNASDVWKKGGSEESLCDQPYH	HuH-7 cell line (Liver)	2013	38
Reviewed	O60449	LY75	Lymphocyte antigen 75	135	IAIKDGHGTAISnASDVWK	LYGAARYRLALKDGHGTAISNASDVWKKGGSEESLCDQPYH	DLBCL cell lines (Diffuse large B-cell lymphoma)	2014	16
Reviewed	O60449	LY75	Lymphocyte antigen 75	135	LALKDGHGTAISnASDVWK	LYGAARYRLALKDGHGTAISNASDVWKKGGSEESLCDQPYH	Platelet	2015	Unpublished
Reviewed	O60449	LY75	Lymphocyte antigen 75	345	KPInNTVEITDVWTYSDTR	GLWQSFSCEAQLPYVCRKPLNNTVELTDVWTYSDTRCDAGW	DLBCL cell lines (Diffuse large B-cell lymphoma)	2014	16
Reviewed	O60449	LY75	Lymphocyte antigen 75	345	KPLnNTVELTDVWTYSDTR	GLWQSFSCEAQLPYVCRKPLNNTVELTDVWTYSDTRCDAGW	Ovarian tumor;Platelet;Breast cancer xenografts;Prostate tumor;Lymphocytes	2015;2015;2015;2007;2007	Unpublished;Unpublished
Reviewed	O60449	LY75	Lymphocyte antigen 75	377	LLVnESNSW	SDTRCDAGWLPNNGFCYLLVNESNSWDKAHAKCKAFSSDLI	Liver	2014	33
Reviewed	O60449	LY75	Lymphocyte antigen 75	377	CDAGWIPNNGFCYIIVnESNSWDKAHAK	SDTRCDAGWLPNNGFCYLLVNESNSWDKAHAKCKAFSSDLI	DLBCL cell lines (Diffuse large B-cell lymphoma)	2014	16
Reviewed	O60449	LY75	Lymphocyte antigen 75	529	GTNCnLTITSR	RHGETCYKIYEDEVPFGTNCNLTITSRFEQEYLNDLMKKYD	Liver	2014	33
Reviewed	O60449	LY75	Lymphocyte antigen 75	529	IYEDEVPFGTNCnITITSR	RHGETCYKIYEDEVPFGTNCNLTITSRFEQEYLNDLMKKYD	DLBCL cell lines (Diffuse large B-cell lymphoma)	2014	16
Reviewed	O60449	LY75	Lymphocyte antigen 75	529	IYEDEVPFGTNCnLTITSR	RHGETCYKIYEDEVPFGTNCNLTITSRFEQEYLNDLMKKYD	Pancreatic islets;Breast cell lines;Colorectal tumor;Liver;Ovarian tumor;OVCAR-3 cell line (Ovarian cancer);Breast cancer xenograftsPBMC Macrophage cells;Prostate tumor;Ovarian tumor;Ovarian cancer cell lines	2012;2012;2014;2014;2015;2015;2015;2015;2007;2007;2007	48;52;22;33;1;Unpublished;Unpublished;Unpublished
Reviewed	O60449	LY75	Lymphocyte antigen 75	865	IAnISGDGQK	SFLATITSFVGLKAIKNKIANISGDGQKWWIRISEWPIDDH	Platelet Plasma membranes;Colorectal tumor;Liver;Ovarian tumor;Breast cancer xenograftsPBMC Macrophage cells;Prostate tumor;Prostate tumor;Lymphocytes	2007;2014;2014;2015;2015;2015;2015;2007;2007	74;22;33;Unpublished;Unpublished
Reviewed	O60449	LY75	Lymphocyte antigen 75	865	IAnISGDGQKWWIR	SFLATITSFVGLKAIKNKIANISGDGQKWWIRISEWPIDDH	DLBCL cell lines (Diffuse large B-cell lymphoma)	2014	16
Reviewed	O60449	LY75	Lymphocyte antigen 75	934	YnVSSIEK	IDLGKPTDCSTKLPFICEKYNVSSLEKYSPDSAAKVQCSEQ	DLBCL cell lines (Diffuse large B-cell lymphoma)	2014	16
Reviewed	O60449	LY75	Lymphocyte antigen 75	934	YnVSSLEK	IDLGKPTDCSTKLPFICEKYNVSSLEKYSPDSAAKVQCSEQ	Platelet Plasma membranesJurkat T cell line;Colorectal tumor;Liver;Ovarian tumor;Platelet;Breast cancer xenografts;Urine;Urine;Prostate tumor;Lymphocytes	2007;2014;2014;2014;2015;2015;2015;2015;2015;2007;2007	74;13;22;33;Unpublished;Unpublished
Reviewed	O60449	LY75	Lymphocyte antigen 75	934	KYnVSSLEK	IDLGKPTDCSTKLPFICEKYNVSSLEKYSPDSAAKVQCSEQ	Liver	2014	33
Reviewed	O60449	LY75	Lymphocyte antigen 75	934	ICEKYnVSSLEKY	IDLGKPTDCSTKLPFICEKYNVSSLEKYSPDSAAKVQCSEQ	Liver	2014	33
Reviewed	O60449	LY75	Lymphocyte antigen 75	1076	nFTSCSER	SRYHCALILNLQKSPFTGTWNFTSCSERHFVSLCQKYSEVK	OVCAR-3 cell line (Ovarian cancer)	2015	1
Reviewed	O60449	LY75	Lymphocyte antigen 75	1076	nFTSCSERHF	SRYHCALILNLQKSPFTGTWNFTSCSERHFVSLCQKYSEVK	Liver	2014	33
Reviewed	O60449	LY75	Lymphocyte antigen 75	1076	PFTGTWnFTSCSE	SRYHCALILNLQKSPFTGTWNFTSCSERHFVSLCQKYSEVK	Breast Cancer cell lines	2013	37
Reviewed	O60449	LY75	Lymphocyte antigen 75	1076	SPFTGTWnFTSCSER	SRYHCALILNLQKSPFTGTWNFTSCSERHFVSLCQKYSEVK	Jurkat T cell line;DLBCL cell lines (Diffuse large B-cell lymphoma);Non-small Cell Lung Carcinoma;Liver;Ovarian tumor;Breast cancer xenografts	2014;2014;2014;2014;2015;2015	13;16;18;33;Unpublished;Unpublished
Reviewed	O60449	LY75	Lymphocyte antigen 75	1103	QTIQnASETVK	RHFVSLCQKYSEVKSRQTLQNASETVKYLNNLYKIIPKTLT	DLBCL cell lines (Diffuse large B-cell lymphoma)	2014	16
Reviewed	O60449	LY75	Lymphocyte antigen 75	1103	QTLQnASETVK	RHFVSLCQKYSEVKSRQTLQNASETVKYLNNLYKIIPKTLT	Platelet Plasma membranesJurkat T cell line;Colorectal tumor;Liver;Ovarian tumor;Platelet;Breast cancer xenografts;Urine;Urine;Prostate tumor;Ovarian tumor	2007;2014;2014;2014;2015;2015;2015;2015;2015;2007;2007	74;13;22;33;Unpublished;Unpublished
Reviewed	O60449	LY75	Lymphocyte antigen 75	1103	SRQTIQnASETVK	RHFVSLCQKYSEVKSRQTLQNASETVKYLNNLYKIIPKTLT	Breast Cancer cell lines	2013	37
Reviewed	O60449	LY75	Lymphocyte antigen 75	1103	SRQTLQnASETVK	RHFVSLCQKYSEVKSRQTLQNASETVKYLNNLYKIIPKTLT	Platelet	2015	Unpublished
Reviewed	O60449	LY75	Lymphocyte antigen 75	1225	TVDCNDNQPGAICYYSGnETEK	FWKTVDCNDNQPGAICYYSGNETEKEVKPVDSVKCPSPVLN	HuH-7 cell line (Liver); Jurkat T cell line;Colorectal tumor;Ovarian tumor;Breast cancer xenografts	2013;2014;2014;2015;2015	38;13;22;Unpublished;Unpublished
Reviewed	O60449	LY75	Lymphocyte antigen 75	1225	TVDCNDNQPGAICYYSGnETEKEVKPVDSVK	FWKTVDCNDNQPGAICYYSGNETEKEVKPVDSVKCPSPVLN	Jurkat T cell line;DLBCL cell lines (Diffuse large B-cell lymphoma)	2014;2014	13;16
Reviewed	O60449	LY75	Lymphocyte antigen 75	1392	IEMVDYKEEYnTTLPQFMPYEDGIYSVIQK	FHQHSILACKIEMVDYKEEYNTTLPQFMPYEDGIYSVIQKK	Ovarian tumor	2015	Unpublished
Reviewed	O60449	LY75	Lymphocyte antigen 75	1535	CPAAKEnGSR	TKSKKLSRLTYSSRCPAAKENGSRWIQYKGHCYKSDQALHS	DLBCL cell lines (Diffuse large B-cell lymphoma)	2014	16
Reviewed	O60449	LY75	Lymphocyte antigen 75	1593	ENNnITMR	VSIKDEDENKFVSRLMRENNNITMRVWLGLSQHSVDQSWSW	DLBCL cell lines (Diffuse large B-cell lymphoma);Colorectal tumor;Liver;Ovarian tumor	2014;2014;2014;2015	16;22;33;Unpublished
Reviewed	O60449	LY75	Lymphocyte antigen 75	1593	LMRENNnITMR	VSIKDEDENKFVSRLMRENNNITMRVWLGLSQHSVDQSWSW	Jurkat T cell line	2014	13
Reviewed	O60449	LY75	Lymphocyte antigen 75	1642	CSMLIASnETWK	VKWENKSKSGVGRCSMLIASNETWKKVECEHGFGRVVCKVP	Jurkat T cell line;Liver;Breast cancer xenografts	2014;2014;2015	13;33;Unpublished
Reviewed	O60449	LY75	Lymphocyte antigen 75	1642	CSMIIASnETWKK	VKWENKSKSGVGRCSMLIASNETWKKVECEHGFGRVVCKVP	DLBCL cell lines (Diffuse large B-cell lymphoma)	2014	16
Reviewed	O60462	NRP2	Neuropilin-2	152	nFTSPNGTIESPGFPEK	GAGFSLRYEIFKTGSEDCSKNFTSPNGTIESPGFPEKYPHN	HuH-7 cell line (Liver); HCC cell lines (Liver);umbilical vein Endothelial Cells;Colorectal tumor;OVCAR-3 cell line (Ovarian cancer);Breast cancer xenografts	2013;2013;2013;2014;2015;2015	38;40;44;22;1;Unpublished
Reviewed	O60462	NRP2	Neuropilin-2	152	TGSEDCSKnFTSPNGTIESPGFPEK	GAGFSLRYEIFKTGSEDCSKNFTSPNGTIESPGFPEKYPHN	DLBCL cell lines (Diffuse large B-cell lymphoma)	2014	16
Reviewed	O60462	NRP2	Neuropilin-2	157	NFTSPnGTIESPGFPEK	LRYEIFKTGSEDCSKNFTSPNGTIESPGFPEKYPHNLDCTF	HuH-7 cell line (Liver); HCC cell lines (Liver);umbilical vein Endothelial Cells;Colorectal tumor;OVCAR-3 cell line (Ovarian cancer);Breast cancer xenografts	2013;2013;2013;2014;2015;2015	38;40;44;22;1;Unpublished
Reviewed	O60462	NRP2	Neuropilin-2	157	TGSEDCSKNFTSPnGTIESPGFPEK	LRYEIFKTGSEDCSKNFTSPNGTIESPGFPEKYPHNLDCTF	DLBCL cell lines (Diffuse large B-cell lymphoma)	2014	16
Reviewed	O60469	DSCAM	Down syndrome cell adhesion molecule	487	TAnNSAGVVLYQAR	SYLNISSSQVRDGGVYRCTANNSAGVVLYQARINVRGPASI	Urine	2007	Unpublished
Reviewed	O60477	BRINP1	BMP/retinoic acid-inducible neural-specific protein 1	553	nSSLDPMFFVYVNPFSGSHSEGWNMPFGEFGYPR	NRMDFIHMVIGMSMRICQMRNSSLDPMFFVYVNPFSGSHSE	Serum	2015	Unpublished
Reviewed	O60477	BRINP1	BMP/retinoic acid-inducible neural-specific protein 1	599	LQNSQCYnWTLLLGNR	FGEFGYPRWEKIRLQNSQCYNWTLLLGNRWKTFFETVHIYL	Serum;Prostate tumor	2007;2007	Unpublished;Unpublished
Reviewed	O60481	ZIC3	Zinc finger protein ZIC 3	371	RFAnSSDRKKHMH	THTGEKPFKCEFEGCDRRFANSSDRKKHMHVHTSDKPYICK	Urine	2007	Unpublished
Reviewed	O60486	PLXNC1	Plexin-C1	86	DQAGnCTEPVSLAPPAR	DQLDYSLEHSLSRLYRDQAGNCTEPVSLAPPARPRPGSSFS	ovarian tumor;Pancreatic islets;Prostate tumor;Ovarian tumor	2011;2012;2007;2007	54;48;Unpublished;Unpublished
Reviewed	O60486	PLXNC1	Plexin-C1	86	DQAGnCTEPVSLAPPARPR	DQLDYSLEHSLSRLYRDQAGNCTEPVSLAPPARPRPGSSFS	Ovarian tumor	2015	Unpublished
Reviewed	O60486	PLXNC1	Plexin-C1	86	DQAGnCTEPVSIAPPARPRPGSSFSK	DQLDYSLEHSLSRLYRDQAGNCTEPVSLAPPARPRPGSSFS	DLBCL cell lines (Diffuse large B-cell lymphoma)	2014	16
Reviewed	O60486	PLXNC1	Plexin-C1	141	GACEVRPIGnISR	GLLLTGWTFDRGACEVRPLGNLSRNSLRNGTEVVSCHPQGS	DLBCL cell lines (Diffuse large B-cell lymphoma)	2014	16
Reviewed	O60486	PLXNC1	Plexin-C1	141	GACEVRPLGnLSR	GLLLTGWTFDRGACEVRPLGNLSRNSLRNGTEVVSCHPQGS	Jurkat T cell line;Colorectal tumor;Ovarian tumor	2014;2014;2015	13;22;Unpublished
Reviewed	O60486	PLXNC1	Plexin-C1	149	nGTEVVSCHPQGSTAGVVYR	FDRGACEVRPLGNLSRNSLRNGTEVVSCHPQGSTAGVVYRA	Liver;Ovarian tumor;Breast cancer xenografts	2014;2015;2015	33;Unpublished;Unpublished
Reviewed	O60486	PLXNC1	Plexin-C1	407	VIIGEnITSNCPEVIYEIK	RTVLFLGTGDGQLLKVILGENLTSNCPEVIYEIKEETPVFY	DLBCL cell lines (Diffuse large B-cell lymphoma)	2014	16
Reviewed	O60486	PLXNC1	Plexin-C1	407	VILGEnLTSNCPEVIYEIK	RTVLFLGTGDGQLLKVILGENLTSNCPEVIYEIKEETPVFY	Pancreatic islets;Ovarian tumor	2012;2015	48;Unpublished
Reviewed	O60486	PLXNC1	Plexin-C1	686	SNVIVTGAnFTR	SIEPQKVSTLGKSNVIVTGANFTRASNITMILKGTSTCDKD	Jurkat T cell line;Prostate;DLBCL cell lines (Diffuse large B-cell lymphoma);Colorectal tumor;LiverPBMC Macrophage cells;Prostate tumor	2014;2014;2014;2014;2014;2015;2007	13;14;16;22;33;Unpublished
Reviewed	O60486	PLXNC1	Plexin-C1	686	GAnFTRASNITMILK	SIEPQKVSTLGKSNVIVTGANFTRASNITMILKGTSTCDKD	Ovarian tumor	2015	Unpublished
Reviewed	O60486	PLXNC1	Plexin-C1	692	ASnITMIIK	VSTLGKSNVIVTGANFTRASNITMILKGTSTCDKDVIQVSH	DLBCL cell lines (Diffuse large B-cell lymphoma)	2014	16
Reviewed	O60486	PLXNC1	Plexin-C1	692	ASnITMILK	VSTLGKSNVIVTGANFTRASNITMILKGTSTCDKDVIQVSH	Jurkat T cell line;Colorectal tumor;Ovarian tumor;Urine;Urine	2014;2014;2015;2015;2015;	13;22;Unpublished;Unpublished;Unpublished;Unpublished
Reviewed	O60486	PLXNC1	Plexin-C1	692	GANFTRASnITMILK	VSTLGKSNVIVTGANFTRASNITMILKGTSTCDKDVIQVSH	Ovarian tumor	2015	Unpublished
Reviewed	O60486	PLXNC1	Plexin-C1	715	GTSTCDKDVIQVSHVInDTHMK	MILKGTSTCDKDVIQVSHVLNDTHMKFSLPSSRKEMKDVCI	DLBCL cell lines (Diffuse large B-cell lymphoma)	2014	16
Reviewed	O60486	PLXNC1	Plexin-C1	871	ENDNFnISK	VESEVDTELEVKIQKENDNFNISKKDIEITLFHGENGQLNC	Colorectal tumor;Ovarian tumor	2014;2015	22;Unpublished
Reviewed	O60486	PLXNC1	Plexin-C1	871	IQKENDNFnISKK	VESEVDTELEVKIQKENDNFNISKKDIEITLFHGENGQLNC	DLBCL cell lines (Diffuse large B-cell lymphoma)	2014	16
Reviewed	O60486	PLXNC1	Plexin-C1	890	DIEITLFHGENGQLnCSFENITR	FNISKKDIEITLFHGENGQLNCSFENITRNQDLTTILCKIK	Ovarian tumor	2015	Unpublished
Reviewed	O60486	PLXNC1	Plexin-C1	895	DIEITLFHGENGQLNCSFEnITR	KDIEITLFHGENGQLNCSFENITRNQDLTTILCKIKGIKTA	Ovarian tumor	2015	Unpublished
Reviewed	O60486	PLXNC1	Plexin-C1	920	TASTIAnSSK	QDLTTILCKIKGIKTASTIANSSKKVRVKLGNLELYVEQES	Prostate;Ovarian tumor	2014;2015	14;Unpublished
Reviewed	O60486	PLXNC1	Plexin-C1	920	TASTIAnSSKK	QDLTTILCKIKGIKTASTIANSSKKVRVKLGNLELYVEQES	DLBCL cell lines (Diffuse large B-cell lymphoma)	2014	16
Reviewed	O60486	PLXNC1	Plexin-C1	1211	nESADVCRNISVNVLDCDTIGQAK	WQVPEFSTVALNVVFEKIPENESADVCRNISVNVLDCDTIG	Urine	2007	Unpublished
Reviewed	O60486	PLXNC1	Plexin-C1	1219	NESADVCRnISVNVLDCDTIGQAK	VALNVVFEKIPENESADVCRNISVNVLDCDTIGQAKEKIFQ	Urine	2007	Unpublished
Reviewed	O60487	MPZL2	Myelin protein zero-like protein 2	39	EAVnGTDARL	TALWPIAAVEIYTSRVLEAVNGTDARLKCTFSSFAPVGDAL	Liver	2014	33
Reviewed	O60487	MPZL2	Myelin protein zero-like protein 2	39	VIEAVnGTDAR	TALWPIAAVEIYTSRVLEAVNGTDARLKCTFSSFAPVGDAL	DLBCL cell lines (Diffuse large B-cell lymphoma);Liver tumor (HCC);Liver	2014;2014;2014	16;32;32
Reviewed	O60487	MPZL2	Myelin protein zero-like protein 2	39	VLEAVnGTDAR	TALWPIAAVEIYTSRVLEAVNGTDARLKCTFSSFAPVGDAL	prostate cancer cell lines;Liver;ovarian tumor;Prostate tumor;Colorectal cancer cell line, HCT-116 (colorectal cancer);SW1990 cell line (Pancreatic cancer);Pancreatic islets;22Rv1 cell line (prostate cancer);Breast cell lines;OVCAR-3 cell line (Ovarian cancer);Ovarian tumorJurkat T cell line;Prostate;HEK293 cell line (embryonic kidney);Non-small Cell Lung Carcinoma;Liver;Colorectal tumor;Liver;Ov…	2007;2009;2011;2011;2011;2012;2012;2012;2012;2013;2013;2014;2014;2014;2014;2014;2014;2014;2015;2015;2015;2015;2015;2015;2015;2015;2015;2007;2007;2007;2007	72;64;54;55;58;47;48;50;52;34;34;13;14;15;18;19;22;33;1;2;3;12;Unpublished;Unpublished;Unpublished;Unpublished
Reviewed	O60487	MPZL2	Myelin protein zero-like protein 2	39	RVIEAVnGTDARI	TALWPIAAVEIYTSRVLEAVNGTDARLKCTFSSFAPVGDAL	Breast Cancer cell lines	2013	37
Reviewed	O60487	MPZL2	Myelin protein zero-like protein 2	39	TSRVLEAVnGTDARL	TALWPIAAVEIYTSRVLEAVNGTDARLKCTFSSFAPVGDAL	Liver	2014	33
Reviewed	O60487	MPZL2	Myelin protein zero-like protein 2	118	nGTYTCQVK	DGNPERYDASILLWKLQFDDNGTYTCQVKNPPDVDGVIGEI	OVCAR-3 cell line (Ovarian cancer)	2015	1
Reviewed	O60487	MPZL2	Myelin protein zero-like protein 2	118	KLQFDDnGTY	DGNPERYDASILLWKLQFDDNGTYTCQVKNPPDVDGVIGEI	Liver	2014	33
Reviewed	O60487	MPZL2	Myelin protein zero-like protein 2	118	KIQFDDnGTYTCQ	DGNPERYDASILLWKLQFDDNGTYTCQVKNPPDVDGVIGEI	Breast Cancer cell lines	2013	37
Reviewed	O60487	MPZL2	Myelin protein zero-like protein 2	118	IQFDDnGTYTCQVK	DGNPERYDASILLWKLQFDDNGTYTCQVKNPPDVDGVIGEI	DLBCL cell lines (Diffuse large B-cell lymphoma)	2014	16
Reviewed	O60487	MPZL2	Myelin protein zero-like protein 2	118	LQFDDnGTYTCQVK	DGNPERYDASILLWKLQFDDNGTYTCQVKNPPDVDGVIGEI	Urine;ovarian tumor;Pancreatic islets;Breast cell linesJurkat T cell line;Prostate;Non-small Cell Lung Carcinoma;Liver;Ovarian tumor;OVCAR-3 cell line (Ovarian cancer);Breast cancer xenografts;Prostate tumor;Urine;Urine;Urine;Prostate tumor;Ovarian tumor	2007;2011;2012;2012;2014;2014;2014;2014;2015;2015;2015;2015;2015;2015;2007;2007;2007	54;48;52;13;14;18;33;1;Unpublished;Unpublished;Unpublished
Reviewed	O60494	CUBN	Cubilin	105	GSAIGLPQnISSQIYQLNSK	IQKNKEDIIELKGSAIGLPQNISSQIYQLNSKLVDLERKFQ	Urine;Urine;Urine;Urine;Urine;Urine;Prostate tumor	2007;2013;2015;2015;2015;2007;2007	45;Unpublished;Unpublished
Reviewed	O60494	CUBN	Cubilin	482	VCGESLSGInGSFSYR	WTGALCQVPQQVCGESLSGINGSFSYRSPDVGYVHDVNCFW	Urine;Urine;Prostate tumor	2007;2007;2007	Unpublished;Unpublished
Reviewed	O60494	CUBN	Cubilin	482	LWTGALCQVPQQVCGESLSGInGSFSYR	WTGALCQVPQQVCGESLSGINGSFSYRSPDVGYVHDVNCFW	Urine;Urine	2015;2015;	Unpublished;Unpublished;Unpublished
Reviewed	O60494	CUBN	Cubilin	711	CGGnYTDPEGELFLPELSGPFTHTR	SDQGFHITYLTSPSDLRCGGNYTDPEGELFLPELSGPFTHT	Urine;Urine;Urine;Prostate tumor	2007;2013;2007;2007	45;Unpublished;Unpublished
Reviewed	O60494	CUBN	Cubilin	781	VCGnGTISHIK	SSQNYIEVRDGETLLGKVCGNGTISHIKSITNSVWIRFKID	Urine;Urine;Urine;Urine;Urine;Prostate tumor	2007;2013;2015;2015;2007;2007	45;Unpublished;Unpublished
Reviewed	O60494	CUBN	Cubilin	1319	ATTGNTVnYTF	PYSENQHCNWTIRATTGNTVNYTFLAFDLEHHINCSTDYLE	Urine;Urine;Prostate tumor	2007;2007;2007	Unpublished;Unpublished
Reviewed	O60494	CUBN	Cubilin	1500	FnASWQAVTGGCGGIFQAPSGEIHSPNYPSPYR	TGNELAIRFKTDLSINGRGFNASWQAVTGGCGGIFQAPSGE	Urine;Urine;Prostate tumor	2007;2007;2007	Unpublished;Unpublished
Reviewed	O60494	CUBN	Cubilin	1802	EGnATGHLVGR	SFQLEDSQDCSRDFVEIREGNATGHLVGRYCGNSFPLNYSS	Urine;Urine;Urine;Urine;Urine;Urine;Prostate tumor	2007;2012;2013;2015;2015;2007;2007	51;45;Unpublished;Unpublished
Reviewed	O60494	CUBN	Cubilin	1819	YCGNSFPLnYSSIVGH	REGNATGHLVGRYCGNSFPLNYSSIVGHTLWVRFISDGSGS	Urine;Urine;Prostate tumor	2007;2007;2007	Unpublished;Unpublished
Reviewed	O60494	CUBN	Cubilin	2085	AGFnASFHK	TGEYMFIRFTSDSSVTRAGFNASFHKSCGGYLHADRGIITS	Urine;Urine;Urine;Urine;Urine;Urine;Urine;Prostate tumor	2007;2012;2013;2015;2015;2015;2007;2007	51;45;Unpublished;Unpublished
Reviewed	O60494	CUBN	Cubilin	2274	FDIEVTPnCTSNYLELR	PPETRIQLQFEDRFDIEVTPNCTSNYLELRDGVDSDAPILS	Urine;Urine;Urine;Urine;Prostate tumor	2007;2015;2015;2007;2007	Unpublished;Unpublished
Reviewed	O60494	CUBN	Cubilin	2400	DFVEIWDnHTSGNILGR	EDFNLQNSSGCEKDFVEIWDNHTSGNILGRYCGNTIPDSID	Urine;Urine;Urine;Urine;Urine;Serum;Prostate tumor	2007;2013;2015;2015;2007;2007;2007	45;Unpublished;Unpublished;Unpublished
Reviewed	O60494	CUBN	Cubilin	2531	LCSSVnVSNEIK	IVFNGIRSNSPQLEKLCSSVNVSNEIKSSGNTMKVIFFTDG	Urine;Urine;Urine;Urine;Urine;Urine;Urine;Serum;Prostate tumor	2007;2012;2013;2015;2015;2015;2007;2007;2007	51;45;Unpublished;Unpublished;Unpublished
Reviewed	O60494	CUBN	Cubilin	2813	YATWNTQTLGCGGIFHSDnGTIR	GFYATWNTQTLGCGGIFHSDNGTIRSPHWPQNFPENSRCSW	Urine;Urine;Prostate tumor	2007;2007;2007	Unpublished;Unpublished
Reviewed	O60494	CUBN	Cubilin	2923	CGSnFTGPSGYIISPNYPK	QSQEAPAQGFSASFVSRCGSNFTGPSGYIISPNYPKQYDNN	Urine;Urine;Urine;Urine;Urine;Prostate tumor	2007;2013;2015;2015;2007;2007	45;Unpublished;Unpublished
Reviewed	O60494	CUBN	Cubilin	3103	FSDFDVVPSTSCSHDYLAIYDGAnTSDPLLGK	FDVVPSTSCSHDYLAIYDGANTSDPLLGKFCGSKRPPNVKS	Urine;Urine;Urine;Urine;Urine;Urine;Prostate tumor	2007;2013;2015;2015;2015;2007;2007	45;Unpublished;Unpublished
Reviewed	O60494	CUBN	Cubilin	3125	SSnNSMLLVFK	SDPLLGKFCGSKRPPNVKSSNNSMLLVFKTDSFQTAKGWKM	Urine;Urine;Urine;Urine;Urine;Urine;Urine;Prostate tumor	2007;2012;2013;2015;2015;2015;2007;2007	51;45;Unpublished;Unpublished
Reviewed	O60494	CUBN	Cubilin	3125	RPPNVKSSnNSMLLVFK	SDPLLGKFCGSKRPPNVKSSNNSMLLVFKTDSFQTAKGWKM	Plasma	2015	8
Reviewed	O60494	CUBN	Cubilin	3357	nASAVPVFYSSMSTAMVIFK	LQLQDSPQGHGNSRFQFCGRNASAVPVFYSSMSTAMVIFKS	Urine;Urine;Urine;Urine;Urine;Urine;Prostate tumor	2007;2013;2015;2015;2015;2007;2007	45;Unpublished;Unpublished
Reviewed	O60494	CUBN	Cubilin	3457	nGSNSNSPLLGK	FHSLGIENSVECRNDFLEVRNGSNSNSPLLGKYCGTLLPNP	Urine;Urine;Urine;Urine	2013;2015;2015;2015;	45;Unpublished;Unpublished;Unpublished;Unpublished
Reviewed	O60494	CUBN	Cubilin	3533	GSFTSPGYPGTYPnNTYCEWVLVAPAGR	GTLYGDRGSFTSPGYPGTYPNNTYCEWVLVAPAGRLVTINF	Urine;Urine;Urine;Urine;Prostate tumor	2007;2015;2015;2007;2007	Unpublished;Unpublished
Reviewed	O60500	NPHS1	Nephrin	708	IWnVTR	LSPAGGPRHRILSSGALHLWNVTRADDGLYQLHCQNSEGTA	Pancreatic islets;HEK293 cell line (embryonic kidney);Colorectal tumor;Breast cancer xenografts;Urine;Urine	2012;2014;2014;2015;2015;2015;	48;15;22;Unpublished;Unpublished;Unpublished;Unpublished
Reviewed	O60503	ADCY9	Adenylate cyclase type 9	206	GDSSnITATAR	LTLAAQFQVLTPVSGRGDSSNLTATARPTDTCLSQVGSFSM	DLBCL cell lines (Diffuse large B-cell lymphoma)	2014	16
Reviewed	O60503	ADCY9	Adenylate cyclase type 9	660	SEAGAEGGAPQNGCQDEHKnSTK	KSEAGAEGGAPQNGCQDEHKNSTKASGGPNPKTQNGLLSPP	HEK293 cell line (embryonic kidney)	2014	15
Reviewed	O60503	ADCY9	Adenylate cyclase type 9	964	NPCnSSVPR	SVLTSPLDAVQNFSSERNPCNSSVPRDLRRPASLIGQEVVL	DLBCL cell lines (Diffuse large B-cell lymphoma);Colorectal tumor	2014;2014	16;22
Reviewed	O60504	SORBS3	Vinexin	608	GPSHPLDLGTSSPnTSQIHWTPYR	PALSHSRGPSHPLDLGTSSPNTSQIHWTPYRAMYQYRPQNE	Serum;Prostate tumor	2007;2007	Unpublished;Unpublished
Reviewed	O60506	SYNCRIP	Heterogeneous nuclear ribonucleoprotein Q	90	DSDLSHVQnK	EDGALAVLQQFKDSDLSHVQNKSAFLCGVMKTYRQREKQGT	Ovarian tumor	2015	Unpublished
Reviewed	O60507	TPST1	Protein-tyrosine sulfotransferase 1	262	FLQIPWnHSVLHHEE	LVLHPERWMRTLLKFLQIPWNHSVLHHEEMIGKAGGVSLSK	Liver	2014	33
Reviewed	O60507	TPST1	Protein-tyrosine sulfotransferase 1	262	FIQIPWnHSVIHHEEMIGK	LVLHPERWMRTLLKFLQIPWNHSVLHHEEMIGKAGGVSLSK	Spermatozoa	2013	43
Reviewed	O60507	TPST1	Protein-tyrosine sulfotransferase 1	262	FLQIPWnHSVLHHEEMIGK	LVLHPERWMRTLLKFLQIPWNHSVLHHEEMIGKAGGVSLSK	OVCAR-3 cell line (Ovarian cancer);LNCap/PC3 cell lines (Prostate cancer)	2015;2015	1;2
Reviewed	O60512	B4GALT3	Beta-1,4-galactosyltransferase 3	57	DVYSnISHIPGAPGGPPAPQGIPYCPER	LFGRDQGPTFDYSHPRDVYSNLSHLPGAPGGPPAPQGLPYC	DLBCL cell lines (Diffuse large B-cell lymphoma)	2014	16
Reviewed	O60512	B4GALT3	Beta-1,4-galactosyltransferase 3	57	DVYSnLSHLPGAPGGPPAPQGLPYCPER	LFGRDQGPTFDYSHPRDVYSNLSHLPGAPGGPPAPQGLPYC	Urine;Pancreatic islets;OVCAR-3 cell line (Ovarian cancer); HCC cell lines (Liver);HEK293 cell line (embryonic kidney);K562A cell line (Leukemia);Liver;Ovarian tumor;OVCAR-3 cell line (Ovarian cancer);Breast cancer xenografts;Urine;Prostate tumor	2007;2012;2013;2013;2014;2014;2014;2015;2015;2015;2007;2007	48;34;40;15;25;33;1;Unpublished;Unpublished
Reviewed	O60512	B4GALT3	Beta-1,4-galactosyltransferase 3	166	VIHQAGnGTF	HPFLQRQQLAYGIYVIHQAGNGTFNRAKLLNVGVREALRDE	Liver	2014	33
Reviewed	O60512	B4GALT3	Beta-1,4-galactosyltransferase 3	166	VIHQAGnGTFNR	HPFLQRQQLAYGIYVIHQAGNGTFNRAKLLNVGVREALRDE	Pancreatic islets	2012	48
Reviewed	O60512	B4GALT3	Beta-1,4-galactosyltransferase 3	166	YVIHQAGnGTFNR	HPFLQRQQLAYGIYVIHQAGNGTFNRAKLLNVGVREALRDE	Pancreatic islets	2012	48
Reviewed	O60512	B4GALT3	Beta-1,4-galactosyltransferase 3	166	GIYVIHQAGnGTFNR	HPFLQRQQLAYGIYVIHQAGNGTFNRAKLLNVGVREALRDE	Pancreatic islets;Ovarian tumor	2012;2015	48;Unpublished
Reviewed	O60512	B4GALT3	Beta-1,4-galactosyltransferase 3	166	QQIAYGIYVIHQAGnGTFNR	HPFLQRQQLAYGIYVIHQAGNGTFNRAKLLNVGVREALRDE	DLBCL cell lines (Diffuse large B-cell lymphoma)	2014	16
Reviewed	O60512	B4GALT3	Beta-1,4-galactosyltransferase 3	166	QQLAYGIYVIHQAGnGTFNR	HPFLQRQQLAYGIYVIHQAGNGTFNRAKLLNVGVREALRDE	Urine;Non-small Cell Lung Carcinoma;OVCAR-3 cell line (Ovarian cancer);LNCap/PC3 cell lines (Prostate cancer);Breast cancer xenografts;Urine;Prostate tumor	2007;2014;2015;2015;2015;2007;2007	18;1;2;Unpublished;Unpublished
Reviewed	O60512	B4GALT3	Beta-1,4-galactosyltransferase 3	337	nITADIGTDPR	DGMNSLTYQLLARELGPLYTNITADIGTDPRGPRAPSGPRY	OVCAR-3 cell line (Ovarian cancer)	2015	1
Reviewed	O60512	B4GALT3	Beta-1,4-galactosyltransferase 3	337	LGPLYTnITADIGTDPR	DGMNSLTYQLLARELGPLYTNITADIGTDPRGPRAPSGPRY	Liver	2014	33
Reviewed	O60512	B4GALT3	Beta-1,4-galactosyltransferase 3	337	EIGPIYTnITADIGTDPR	DGMNSLTYQLLARELGPLYTNITADIGTDPRGPRAPSGPRY	DLBCL cell lines (Diffuse large B-cell lymphoma)	2014	16
Reviewed	O60512	B4GALT3	Beta-1,4-galactosyltransferase 3	337	ELGPLYTnITADIGTDPR	DGMNSLTYQLLARELGPLYTNITADIGTDPRGPRAPSGPRY	IGROV-1/CP cell line (Ovarian cancer)IGROV-1/CP;Pancreatic islets; HCC cell lines (Liver);K562A cell line (Leukemia);Liver;Ovarian tumor;OVCAR-3 cell line (Ovarian cancer);LNCap/PC3 cell lines (Prostate cancer);Breast cancer xenografts;Urine;Urine	2007;2012;2013;2014;2014;2015;2015;2015;2015;2015;2015;	75;48;40;25;33;Unpublished;1;2;Unpublished;Unpublished;Unpublished;Unpublished
Reviewed	O60512	B4GALT3	Beta-1,4-galactosyltransferase 3	385	PGPLSTAnHTALR	FRQEMLQRRPPARPGPLSTANHTALRGSH------------	Ovarian tumor	2015	Unpublished
Reviewed	O60512	B4GALT3	Beta-1,4-galactosyltransferase 3	385	RPPARPGPISTAnHTAIR	FRQEMLQRRPPARPGPLSTANHTALRGSH------------	DLBCL cell lines (Diffuse large B-cell lymphoma)	2014	16
Reviewed	O60512	B4GALT3	Beta-1,4-galactosyltransferase 3	385	RPPARPGPLSTAnHTALR	FRQEMLQRRPPARPGPLSTANHTALRGSH------------	HepG2 cell line (Liver);HuH-7 cell line (Liver)	2013;2013	38;38
Reviewed	O60513	B4GALT4	Beta-1,4-galactosyltransferase 4	220	VVGRnSTGY	ENDFNLYKCEEHPKHLVVGRNSTGYRLRYSGYFGGVTALSR	Liver	2014	33
Reviewed	O60513	B4GALT4	Beta-1,4-galactosyltransferase 4	220	HLVVGRnSTGYR	ENDFNLYKCEEHPKHLVVGRNSTGYRLRYSGYFGGVTALSR	HuH-7 cell line (Liver)	2013	38
Reviewed	O60548	FOXD2	Forkhead box protein D2	213	ESADMFDnGSFLRRR	GNPGKGNYWTLDPESADMFDNGSFLRRRKRFKRQPLPPPHP	Prostate tumor;Bladder tumor	2007;2007	Unpublished;Unpublished
Reviewed	O60563	CCNT1	Cyclin-T1	53	nVSQLTINTAIVYMHR	KELSYRQQAANLLQDMGQRLNVSQLTINTAIVYMHRFYMIQ	Prostate tumor;Breast tumor	2007;2007	Unpublished;Unpublished
Reviewed	O60565	GREM1	Gremlin-1	42	nDSEQTQSPQQPGSR	AEGKKKGSQGAIPPPDKAQHNDSEQTQSPQQPGSRNRGRGQ	OVCAR-3 cell line (Ovarian cancer)	2015	1
Reviewed	O60565	GREM1	Gremlin-1	42	AQHnDSEQTQSPQQPGSR	AEGKKKGSQGAIPPPDKAQHNDSEQTQSPQQPGSRNRGRGQ	Prostate;Non-small Cell Lung Carcinoma;Colorectal tumor;Ovarian tumor;Prostate tumor	2014;2014;2014;2015;2015	14;18;22;Unpublished;Unpublished
Reviewed	O60565	GREM1	Gremlin-1	42	AQHnDSEQTQSPQQPGSRNR	AEGKKKGSQGAIPPPDKAQHNDSEQTQSPQQPGSRNRGRGQ	Colorectal tumor	2014	22
Reviewed	O60566	BUB1B	Mitotic checkpoint serine/threonine-protein kinase BUB1 beta	52	nNTLQQQK	LRQGRIMSTLQGALAQESACNNTLQQQKRAFEYEIRFYTGN	OVCAR-3 cell line (Ovarian cancer)	2015	1
Reviewed	O60566	BUB1B	Mitotic checkpoint serine/threonine-protein kinase BUB1 beta	983	nLSEIK	LLFKEHLQVFWDGSFWKLSQNISELKDGELWNKFFVRILNA	Breast cancer xenografts	2015	Unpublished
Reviewed	O60568	PLOD3	Procollagen-lysine,2-oxoglutarate 5-dioxygenase 3	63	FFnYTVR	TVATAETEGYLRFLRSAEFFNYTVRTLGLGEEWRGGDVART	Liver	2014	33
Reviewed	O60568	PLOD3	Procollagen-lysine,2-oxoglutarate 5-dioxygenase 3	63	AEFFnYTVR	TVATAETEGYLRFLRSAEFFNYTVRTLGLGEEWRGGDVART	Pancreatic islets	2012	48
Reviewed	O60568	PLOD3	Procollagen-lysine,2-oxoglutarate 5-dioxygenase 3	63	SAEFFnYTVR	TVATAETEGYLRFLRSAEFFNYTVRTLGLGEEWRGGDVART	DRO-1 Cell Line (Thyroid Cance);HCCLM3 cell line (Liver);Colorectal cancer cell line, HCT-116 (colorectal cancer);Breast cell lines;OVCAR-3 cell line (Ovarian cancer);SKOV-3 cell line (Ovarian cancer);Ovarian tumor;HepG2 cell line (Liver);HuH-7 cell line (Liver); HCC cell lines (Liver);umbilical vein Endothelial CellsJurkat T cell line;Prostate;HEK293 cell line (embryonic kidney);DLBCL cell lines…	2009;2009;2011;2012;2013;2013;2013;2013;2013;2013;2013;2014;2014;2014;2014;2014;2014;2014;2014;2014;2015;2015;2015;2015;2015;2015;2015;2015;2015;2015;2007;2007;2007;2007	62;63;58;52;34;34;34;38;38;40;44;13;14;15;16;18;22;32;32;33;1;2;12;Unpublished;Unpublished;Unpublished;Unpublished
Reviewed	O60568	PLOD3	Procollagen-lysine,2-oxoglutarate 5-dioxygenase 3	63	RSAEFFnYTVRTI	TVATAETEGYLRFLRSAEFFNYTVRTLGLGEEWRGGDVART	Breast Cancer cell lines	2013	37
Reviewed	O60568	PLOD3	Procollagen-lysine,2-oxoglutarate 5-dioxygenase 3	63	SAEFFnYTVRTLGLGEEWRGGDVAR	TVATAETEGYLRFLRSAEFFNYTVRTLGLGEEWRGGDVART	HuH-7 cell line (Liver)	2013	38
Reviewed	O60568	PLOD3	Procollagen-lysine,2-oxoglutarate 5-dioxygenase 3	548	HEnYSR	PDLWQIFDNPVDWKEQYIHENYSRALEGEGIVEQPCPDVYW	Pancreatic islets	2012	48
Reviewed	O60568	PLOD3	Procollagen-lysine,2-oxoglutarate 5-dioxygenase 3	548	IHEnYSR	PDLWQIFDNPVDWKEQYIHENYSRALEGEGIVEQPCPDVYW	Pancreatic islets	2012	48
Reviewed	O60568	PLOD3	Procollagen-lysine,2-oxoglutarate 5-dioxygenase 3	548	EQYIHEnY	PDLWQIFDNPVDWKEQYIHENYSRALEGEGIVEQPCPDVYW	Liver	2014	33
Reviewed	O60568	PLOD3	Procollagen-lysine,2-oxoglutarate 5-dioxygenase 3	548	YIHEnYSR	PDLWQIFDNPVDWKEQYIHENYSRALEGEGIVEQPCPDVYW	Pancreatic islets	2012	48
Reviewed	O60568	PLOD3	Procollagen-lysine,2-oxoglutarate 5-dioxygenase 3	548	KEQYIHEnY	PDLWQIFDNPVDWKEQYIHENYSRALEGEGIVEQPCPDVYW	Liver	2014	33
Reviewed	O60568	PLOD3	Procollagen-lysine,2-oxoglutarate 5-dioxygenase 3	548	QYIHEnYSR	PDLWQIFDNPVDWKEQYIHENYSRALEGEGIVEQPCPDVYW	Pancreatic islets	2012	48
Reviewed	O60568	PLOD3	Procollagen-lysine,2-oxoglutarate 5-dioxygenase 3	548	EQYIHEnYSR	PDLWQIFDNPVDWKEQYIHENYSRALEGEGIVEQPCPDVYW	Urine;IGROV-1/CP cell line (Ovarian cancer)IGROV-1/CP;HCCLM3 cell line (Liver);HEK293T cell line (embryonic kidney);Pancreatic islets;OVCAR-3 cell line (Ovarian cancer);SKOV-3 cell line (Ovarian cancer);Ovarian tumor;HepG2 cell line (Liver);HuH-7 cell line (Liver); HCC cell lines (Liver)Jurkat T cell line;DLBCL cell lines (Diffuse large B-cell lymphoma);Non-small Cell Lung Carcinoma;Colorectal tu…	2007;2007;2009;2011;2012;2013;2013;2013;2013;2013;2013;2014;2014;2014;2014;2014;2014;2014;2015;2015;2015;2015;2015;2015;2015;2015;2007;2007	75;63;57;48;34;34;34;38;38;40;13;16;18;22;32;32;33;1;2;Unpublished;Unpublished
Reviewed	O60568	PLOD3	Procollagen-lysine,2-oxoglutarate 5-dioxygenase 3	548	EQYIHEnYSRAIE	PDLWQIFDNPVDWKEQYIHENYSRALEGEGIVEQPCPDVYW	Breast Cancer cell lines	2013	37
Reviewed	O60568	PLOD3	Procollagen-lysine,2-oxoglutarate 5-dioxygenase 3	548	DNPVDWKEQYIHEnY	PDLWQIFDNPVDWKEQYIHENYSRALEGEGIVEQPCPDVYW	Liver	2014	33
Reviewed	O60568	PLOD3	Procollagen-lysine,2-oxoglutarate 5-dioxygenase 3	548	QIFDNPVDWKEQYIHEnY	PDLWQIFDNPVDWKEQYIHENYSRALEGEGIVEQPCPDVYW	Liver	2014	33
Reviewed	O60568	PLOD3	Procollagen-lysine,2-oxoglutarate 5-dioxygenase 3	548	IHEnYSRALEGEGIVEQPCPDVY	PDLWQIFDNPVDWKEQYIHENYSRALEGEGIVEQPCPDVYW	Liver	2014	33
Reviewed	O60568	PLOD3	Procollagen-lysine,2-oxoglutarate 5-dioxygenase 3	548	YDTEHLHPDLWQIFDNPVDWKEQYIHEnYSR	PDLWQIFDNPVDWKEQYIHENYSRALEGEGIVEQPCPDVYW	LNCap/PC3 cell lines (Prostate cancer);Hela cell line (cervical cancer)	2015;2015	2;12
Reviewed	O60583	CCNT2	Cyclin-T2	52	nVSQLTINTAIVYMHR	KELSCRQQAANLIQEMGQRLNVSQLTINTAIVYMHRFYMHH	Prostate tumor;Breast tumor	2007;2007	Unpublished;Unpublished
Reviewed	O60602	TLR5	Toll-like receptor 5	37	FCnLTQVPQVLNTTER	PVFGIPSCSFDGRIAFYRFCNLTQVPQVLNTTERLLLSFNY	Breast cancer xenografts;Urine;Urine	2015;2015;2015;	Unpublished;Unpublished;Unpublished;Unpublished
Reviewed	O60602	TLR5	Toll-like receptor 5	46	FCNLTQVPQVLnTTER	FDGRIAFYRFCNLTQVPQVLNTTERLLLSFNYIRTVTASSF	Breast cancer xenografts;Urine;Urine	2015;2015;2015;	Unpublished;Unpublished;Unpublished;Unpublished
Reviewed	O60602	TLR5	Toll-like receptor 5	422	InLTANLIHLSENR	IPSIPDIFLSGNKLVTLPKINLTANLIHLSENRLENLDILY	Ovarian tumor;Breast cancer xenografts	2015;2015	Unpublished;Unpublished
Reviewed	O60602	TLR5	Toll-like receptor 5	422	GNKLVTLPKInLTANLIHLS	IPSIPDIFLSGNKLVTLPKINLTANLIHLSENRLENLDILY	Human	2015	6
Reviewed	O60603	TLR2	Toll-like receptor 2	199	KSIQnVSHL	LEIDASDLQSYEPKSLKSIQNVSHLILHMKQHILLLEIFVD	Liver	2014	33
Reviewed	O60603	TLR2	Toll-like receptor 2	199	SIQnVSHLILH	LEIDASDLQSYEPKSLKSIQNVSHLILHMKQHILLLEIFVD	Ovarian tumor	2015	Unpublished
Reviewed	O60603	TLR2	Toll-like receptor 2	199	SIQnVSHIIIHMK	LEIDASDLQSYEPKSLKSIQNVSHLILHMKQHILLLEIFVD	DLBCL cell lines (Diffuse large B-cell lymphoma)	2014	16
Reviewed	O60603	TLR2	Toll-like receptor 2	199	SIQnVSHLILHMK	LEIDASDLQSYEPKSLKSIQNVSHLILHMKQHILLLEIFVD	Liver;Ovarian tumor;Breast cancer xenografts	2014;2015;2015	33;Unpublished;Unpublished
Reviewed	O60603	TLR2	Toll-like receptor 2	414	nLTNIDISK	LRQNHLASLEKTGETLLTLKNLTNIDISKNSFHSMPETCQW	Liver;Ovarian tumor;Breast cancer xenografts;Urine;Urine	2014;2015;2015;2015;2015;	33;Unpublished;Unpublished;Unpublished;Unpublished;Unpublished
Reviewed	O60603	TLR2	Toll-like receptor 2	442	YInISSTR	KNSFHSMPETCQWPEKMKYLNLSSTRIHSVTGCIPKTLEIL	DLBCL cell lines (Diffuse large B-cell lymphoma)	2014	16
Reviewed	O60603	TLR2	Toll-like receptor 2	442	YLnLSSTR	KNSFHSMPETCQWPEKMKYLNLSSTRIHSVTGCIPKTLEIL	Colorectal tumor;Liver;Ovarian tumor;Breast cancer xenografts;Urine;Urine;Urine	2014;2014;2015;2015;2015;2015;2015;	22;33;Unpublished;Unpublished;Unpublished;Unpublished;Unpublished;Unpublished
Reviewed	O60609	GFRA3	GDNF family receptor alpha-3	309	nTSVALSCTCR	LRAYLGLIGTAMTPNFVSNVNTSVALSCTCRGSGNLQEECE	OVCAR-3 cell line (Ovarian cancer)	2015	1
Reviewed	O60610	DIAPH1	Protein diaphanous homolog 1	70	nSSASYGDDPTAQSLQDVSDEQVLVLFEQMLLDMNLNEEK	ERFTSMRIKKEKEKPNSAHRNSSASYGDDPTAQSLQDVSDE	Serum	2015	Unpublished
Reviewed	O60635	TSPAN1	Tetraspanin-1	141	DFTQVWnTTMKGI	LVVPAIKKDYGSQEDFTQVWNTTMKGLKCCGFTNYTDFEDS	Breast Cancer cell lines	2013	37
Reviewed	O60635	TSPAN1	Tetraspanin-1	141	DYGSQEDFTQVWnTTMK	LVVPAIKKDYGSQEDFTQVWNTTMKGLKCCGFTNYTDFEDS	IGROV-1/CP cell line (Ovarian cancer)IGROV-1/CP;ARO Cell Line (Thyroid Cance);ovarian tumor;Saliva;Pancreatic islets;Breast cell lines;SKOV-3 cell line (Ovarian cancer);lung;Urine;Prostate;Lung Adenocarcinoma;Non-small Cell Lung Carcinoma;Colorectal tumor;Ovarian tumor;OVCAR-3 cell line (Ovarian cancer);LNCap/PC3 cell lines (Prostate cancer);Breast cancer xenografts;Prostate tumor;Urine;Urine;Pro…	2007;2009;2011;2011;2012;2012;2013;2013;2013;2014;2014;2014;2014;2015;2015;2015;2015;2015;2015;2015;2007;2007;2007	75;62;54;56;48;52;34;39;45;14;36;18;22;1;2;Unpublished;Unpublished;Unpublished
Reviewed	O60635	TSPAN1	Tetraspanin-1	141	KDYGSQEDFTQVWnTTMK	LVVPAIKKDYGSQEDFTQVWNTTMKGLKCCGFTNYTDFEDS	Urine;Breast cell lines;Spermatozoa;Urine;Non-small Cell Lung Carcinoma;Colorectal tumor;Ovarian tumor;LNCap/PC3 cell lines (Prostate cancer);Urine;Urine	2007;2012;2013;2013;2014;2014;2015;2015;2015;2015;	Unpublished;52;43;45;18;22;Unpublished;2;Unpublished;Unpublished;Unpublished
Reviewed	O60635	TSPAN1	Tetraspanin-1	154	KCCGFTnYTDFED	EDFTQVWNTTMKGLKCCGFTNYTDFEDSPYFKENSAFPPFC	Breast Cancer cell lines	2013	37
Reviewed	O60635	TSPAN1	Tetraspanin-1	154	TnYTDFEDSPYFK	EDFTQVWNTTMKGLKCCGFTNYTDFEDSPYFKENSAFPPFC	Prostate;Ovarian tumor	2014;2015	14;Unpublished
Reviewed	O60635	TSPAN1	Tetraspanin-1	154	GFTnYTDFEDSPYFK	EDFTQVWNTTMKGLKCCGFTNYTDFEDSPYFKENSAFPPFC	Prostate	2014	14
Reviewed	O60635	TSPAN1	Tetraspanin-1	154	CGFTnYTDFEDSPYFK	EDFTQVWNTTMKGLKCCGFTNYTDFEDSPYFKENSAFPPFC	Ovarian tumor	2015	Unpublished
Reviewed	O60635	TSPAN1	Tetraspanin-1	154	CCGFTnYTDFEDSPYFK	EDFTQVWNTTMKGLKCCGFTNYTDFEDSPYFKENSAFPPFC	Breast cell lines;Spermatozoa;Urine;Prostate;Prostate tumor;Urine;Urine;Prostate tumor;Ovarian tumor;Ovarian cancer cell lines	2012;2013;2013;2014;2015;2015;2015;2007;2007;2007	52;43;45;14;Unpublished;Unpublished;Unpublished
Reviewed	O60635	TSPAN1	Tetraspanin-1	178	nVTNTANETCTK	FEDSPYFKENSAFPPFCCNDNVTNTANETCTKQKAHDQKVE	Prostate;OVCAR-3 cell line (Ovarian cancer)	2014;2015	14;1
Reviewed	O60635	TSPAN1	Tetraspanin-1	178	ENSAFPPFCCNDnVTNTANETCTK	FEDSPYFKENSAFPPFCCNDNVTNTANETCTKQKAHDQKVE	Breast cell lines;Spermatozoa;Prostate;Prostate tumor;Urine;Urine	2012;2013;2014;2015;2015;2015;	52;43;14;Unpublished;Unpublished;Unpublished;Unpublished
Reviewed	O60635	TSPAN1	Tetraspanin-1	184	AnETCTK	FKENSAFPPFCCNDNVTNTANETCTKQKAHDQKVEGCFNQL	Ovarian tumor	2015	Unpublished
Reviewed	O60635	TSPAN1	Tetraspanin-1	184	NVTNTAnETCTK	FKENSAFPPFCCNDNVTNTANETCTKQKAHDQKVEGCFNQL	Prostate;OVCAR-3 cell line (Ovarian cancer)	2014;2015	14;1
Reviewed	O60635	TSPAN1	Tetraspanin-1	184	ENSAFPPFCCNDNVTNTAnETCTK	FKENSAFPPFCCNDNVTNTANETCTKQKAHDQKVEGCFNQL	Breast cell lines;Spermatozoa;Prostate;Prostate tumor;Urine;Urine	2012;2013;2014;2015;2015;2015;	52;43;14;Unpublished;Unpublished;Unpublished;Unpublished
Reviewed	O60637	TSPAN3	Tetraspanin-3	127	nGTNPDAASR	YRAKVENEVDRSIQKVYKTYNGTNPDAASRAIDYVQRQLHC	OVCAR-3 cell line (Ovarian cancer)	2015	1
Reviewed	O60637	TSPAN3	Tetraspanin-3	127	TYnGTNPDAASR	YRAKVENEVDRSIQKVYKTYNGTNPDAASRAIDYVQRQLHC	HEK293T cell line (embryonic kidney);Colorectal cancer cell line, HCT-116 (colorectal cancer);SW1990 cell line (Pancreatic cancer);Breast cell lines;OVCAR-3 cell line (Ovarian cancer);SKOV-3 cell line (Ovarian cancer);Ovarian tumor;HepG2 cell line (Liver);HuH-7 cell line (Liver); HCC cell lines (Liver)Jurkat T cell line;HEK293 cell line (embryonic kidney);DLBCL cell lines (Diffuse large B-cell ly…	2011;2011;2012;2012;2013;2013;2013;2013;2013;2013;2014;2014;2014;2014;2014;2014;2014;2015;2015;2015;2015;2015;2015;2015;2015;2015;2007;2007;2007	57;58;47;52;34;34;34;38;38;40;13;15;16;17;18;22;33;1;2;3;12;Unpublished;Unpublished;Unpublished
Reviewed	O60637	TSPAN3	Tetraspanin-3	127	KTYnGTNPDAASR	YRAKVENEVDRSIQKVYKTYNGTNPDAASRAIDYVQRQLHC	Ovarian tumor	2015	Unpublished
Reviewed	O60637	TSPAN3	Tetraspanin-3	127	KVYKTYnGTNPDA	YRAKVENEVDRSIQKVYKTYNGTNPDAASRAIDYVQRQLHC	Breast Cancer cell lines	2013	37
Reviewed	O60637	TSPAN3	Tetraspanin-3	127	VYKTYnGTNPDAASR	YRAKVENEVDRSIQKVYKTYNGTNPDAASRAIDYVQRQLHC	Breast cell lines;HEK293 cell line (embryonic kidney);LNCap/PC3 cell lines (Prostate cancer)	2012;2014;2015	52;15;2
Reviewed	O60637	TSPAN3	Tetraspanin-3	152	QLHCCGIHnYSDWE	DAASRAIDYVQRQLHCCGIHNYSDWENTDWFKETKNQSVPL	Liver	2014	33
Reviewed	O60637	TSPAN3	Tetraspanin-3	152	GIHnYSDWENTDWFK	DAASRAIDYVQRQLHCCGIHNYSDWENTDWFKETKNQSVPL	HEK293T cell line (embryonic kidney)	2011	57
Reviewed	O60637	TSPAN3	Tetraspanin-3	152	QLHCCGIHnYSDWENTDWFK	DAASRAIDYVQRQLHCCGIHNYSDWENTDWFKETKNQSVPL	ARO Cell Line (Thyroid Cance);Pancreatic islets;Breast cell lines;HuH-7 cell line (Liver)	2009;2012;2012;2013	62;48;52;38
Reviewed	O60637	TSPAN3	Tetraspanin-3	152	QIHCCGIHnYSDWENTDWFKETK	DAASRAIDYVQRQLHCCGIHNYSDWENTDWFKETKNQSVPL	DLBCL cell lines (Diffuse large B-cell lymphoma)	2014	16
Reviewed	O60637	TSPAN3	Tetraspanin-3	152	AIDYVQRQLHCCGIHnYSDWENTDWFK	DAASRAIDYVQRQLHCCGIHNYSDWENTDWFKETKNQSVPL	HuH-7 cell line (Liver)	2013	38
Reviewed	O60637	TSPAN3	Tetraspanin-3	152	QIHCCGIHnYSDWENTDWFKETKNQSVPISCCR	DAASRAIDYVQRQLHCCGIHNYSDWENTDWFKETKNQSVPL	DLBCL cell lines (Diffuse large B-cell lymphoma)	2014	16
Reviewed	O60637	TSPAN3	Tetraspanin-3	167	KETKnQSVPL	CCGIHNYSDWENTDWFKETKNQSVPLSCCRETASNCNGSLA	Liver	2014	33
Reviewed	O60637	TSPAN3	Tetraspanin-3	167	nQSVPISCCR	CCGIHNYSDWENTDWFKETKNQSVPLSCCRETASNCNGSLA	DLBCL cell lines (Diffuse large B-cell lymphoma)	2014	16
Reviewed	O60637	TSPAN3	Tetraspanin-3	167	nQSVPLSCCR	CCGIHNYSDWENTDWFKETKNQSVPLSCCRETASNCNGSLA	ARO Cell Line (Thyroid Cance);Breast cell lines; HCC cell lines (Liver); Jurkat T cell line;HEK293 cell line (embryonic kidney);Liver;Ovarian tumor;OVCAR-3 cell line (Ovarian cancer);Breast cancer xenografts;Hela cell line (cervical cancer)	2009;2012;2013;2014;2014;2014;2015;2015;2015;2015	62;52;40;13;15;33;Unpublished;1;Unpublished;12
Reviewed	O60637	TSPAN3	Tetraspanin-3	167	ETKnQSVPLSCCR	CCGIHNYSDWENTDWFKETKNQSVPLSCCRETASNCNGSLA	Pancreatic islets; Jurkat T cell line;Hela cell line (cervical cancer)	2012;2014;2015	48;13;12
Reviewed	O60637	TSPAN3	Tetraspanin-3	167	WFKETKnQSVPIS	CCGIHNYSDWENTDWFKETKNQSVPLSCCRETASNCNGSLA	Breast Cancer cell lines	2013	37
Reviewed	O60637	TSPAN3	Tetraspanin-3	167	QIHCCGIHNYSDWENTDWFKETKnQSVPISCCR	CCGIHNYSDWENTDWFKETKNQSVPLSCCRETASNCNGSLA	DLBCL cell lines (Diffuse large B-cell lymphoma)	2014	16
Reviewed	O60637	TSPAN3	Tetraspanin-3	183	ETASNCnGSLAHPSDLYAEGCEALVVK	KETKNQSVPLSCCRETASNCNGSLAHPSDLYAEGCEALVVK	HEK293T cell line (embryonic kidney);Pancreatic islets;Breast cell lines;K562A cell line (Leukemia);Ovarian tumor;Breast cancer xenografts	2011;2012;2012;2014;2015;2015	57;48;52;25;Unpublished;Unpublished
Reviewed	O60637	TSPAN3	Tetraspanin-3	183	ETASNCnGSIAHPSDIYAEGCEAIVVKK	KETKNQSVPLSCCRETASNCNGSLAHPSDLYAEGCEALVVK	DLBCL cell lines (Diffuse large B-cell lymphoma)	2014	16
Reviewed	O60641	SNAP91	Clathrin coat assembly protein AP180	105	NTLFnLSNFLDK	LMVHGNERFIQYLASRNTLFNLSNFLDKSGSHGYDMSTFIR	Serum	2015	10
Reviewed	O60656	UGT1A9	UDP-glucuronosyltransferase 1-9	71	nCTVKTY	RGHEVVVVMPEVSWQLGRSLNCTVKTYSTSYTLEDLDREFK	Liver	2014	33
Reviewed	O60656	UGT1A9	UDP-glucuronosyltransferase 1-9	71	SInCTVK	RGHEVVVVMPEVSWQLGRSLNCTVKTYSTSYTLEDLDREFK	Liver tumor (HCC)	2014	32
Reviewed	O60656	UGT1A9	UDP-glucuronosyltransferase 1-9	71	SLnCTVK	RGHEVVVVMPEVSWQLGRSLNCTVKTYSTSYTLEDLDREFK	Colorectal tumor;Liver	2014;2014	22;33
Reviewed	O60656	UGT1A9	UDP-glucuronosyltransferase 1-9	71	QLGRSLnCT	RGHEVVVVMPEVSWQLGRSLNCTVKTYSTSYTLEDLDREFK	Liver	2014	33
Reviewed	O60656	UGT1A9	UDP-glucuronosyltransferase 1-9	71	SLnCTVKTY	RGHEVVVVMPEVSWQLGRSLNCTVKTYSTSYTLEDLDREFK	Liver	2014	33
Reviewed	O60656	UGT1A9	UDP-glucuronosyltransferase 1-9	71	GRSLnCTVKTY	RGHEVVVVMPEVSWQLGRSLNCTVKTYSTSYTLEDLDREFK	Liver	2014	33
Reviewed	O60656	UGT1A9	UDP-glucuronosyltransferase 1-9	71	QLGRSLnCTVK	RGHEVVVVMPEVSWQLGRSLNCTVKTYSTSYTLEDLDREFK	Liver	2014	33
Reviewed	O60656	UGT1A9	UDP-glucuronosyltransferase 1-9	71	LGRSLnCTVKTY	RGHEVVVVMPEVSWQLGRSLNCTVKTYSTSYTLEDLDREFK	Liver	2014	33
Reviewed	O60656	UGT1A9	UDP-glucuronosyltransferase 1-9	71	QLGRSLnCTVKTY	RGHEVVVVMPEVSWQLGRSLNCTVKTYSTSYTLEDLDREFK	Liver	2014	33
Reviewed	O60656	UGT1A9	UDP-glucuronosyltransferase 1-9	71	SLnCTVKTYSTSY	RGHEVVVVMPEVSWQLGRSLNCTVKTYSTSYTLEDLDREFK	Liver	2014	33
Reviewed	O60656	UGT1A9	UDP-glucuronosyltransferase 1-9	71	VSWQLGRSLnCTVK	RGHEVVVVMPEVSWQLGRSLNCTVKTYSTSYTLEDLDREFK	Liver	2014	33
Reviewed	O60656	UGT1A9	UDP-glucuronosyltransferase 1-9	71	SLnCTVKTYSTSYTLEDLDR	RGHEVVVVMPEVSWQLGRSLNCTVKTYSTSYTLEDLDREFK	Liver	2014	33
Reviewed	O60656	UGT1A9	UDP-glucuronosyltransferase 1-9	292	AYInASGE	IGGINCHQGKPLPMEFEAYINASGEHGIVVFSLGSMVSEIP	Liver	2014	33
Reviewed	O60656	UGT1A9	UDP-glucuronosyltransferase 1-9	292	AYInASGEH	IGGINCHQGKPLPMEFEAYINASGEHGIVVFSLGSMVSEIP	Liver	2014	33
Reviewed	O60656	UGT1A9	UDP-glucuronosyltransferase 1-9	292	EAYInASGEH	IGGINCHQGKPLPMEFEAYINASGEHGIVVFSLGSMVSEIP	Liver	2014	33
Reviewed	O60656	UGT1A9	UDP-glucuronosyltransferase 1-9	292	FEAYInASGE	IGGINCHQGKPLPMEFEAYINASGEHGIVVFSLGSMVSEIP	Liver	2014	33
Reviewed	O60656	UGT1A9	UDP-glucuronosyltransferase 1-9	292	InASGEHGIV	IGGINCHQGKPLPMEFEAYINASGEHGIVVFSLGSMVSEIP	Liver	2014	33
Reviewed	O60656	UGT1A9	UDP-glucuronosyltransferase 1-9	292	EAYInASGEHG	IGGINCHQGKPLPMEFEAYINASGEHGIVVFSLGSMVSEIP	Liver	2014	33
Reviewed	O60656	UGT1A9	UDP-glucuronosyltransferase 1-9	292	InASGEHGIVV	IGGINCHQGKPLPMEFEAYINASGEHGIVVFSLGSMVSEIP	Liver	2014	33
Reviewed	O60656	UGT1A9	UDP-glucuronosyltransferase 1-9	292	nASGEHGIVVF	IGGINCHQGKPLPMEFEAYINASGEHGIVVFSLGSMVSEIP	Liver	2014	33
Reviewed	O60656	UGT1A9	UDP-glucuronosyltransferase 1-9	292	EAYInASGEHGI	IGGINCHQGKPLPMEFEAYINASGEHGIVVFSLGSMVSEIP	Liver	2014	33
Reviewed	O60656	UGT1A9	UDP-glucuronosyltransferase 1-9	292	InASGEHGIVVF	IGGINCHQGKPLPMEFEAYINASGEHGIVVFSLGSMVSEIP	Liver	2014	33
Reviewed	O60656	UGT1A9	UDP-glucuronosyltransferase 1-9	292	AYInASGEHGIVV	IGGINCHQGKPLPMEFEAYINASGEHGIVVFSLGSMVSEIP	Liver	2014	33
Reviewed	O60656	UGT1A9	UDP-glucuronosyltransferase 1-9	292	EAYInASGEHGIV	IGGINCHQGKPLPMEFEAYINASGEHGIVVFSLGSMVSEIP	Liver	2014	33
Reviewed	O60656	UGT1A9	UDP-glucuronosyltransferase 1-9	292	YInASGEHGIVVF	IGGINCHQGKPLPMEFEAYINASGEHGIVVFSLGSMVSEIP	Liver	2014	33
Reviewed	O60656	UGT1A9	UDP-glucuronosyltransferase 1-9	292	AYInASGEHGIVVF	IGGINCHQGKPLPMEFEAYINASGEHGIVVFSLGSMVSEIP	Liver	2014	33
Reviewed	O60656	UGT1A9	UDP-glucuronosyltransferase 1-9	292	EAYInASGEHGIVV	IGGINCHQGKPLPMEFEAYINASGEHGIVVFSLGSMVSEIP	Liver	2014	33
Reviewed	O60656	UGT1A9	UDP-glucuronosyltransferase 1-9	292	EAYInASGEHGIVVF	IGGINCHQGKPLPMEFEAYINASGEHGIVVFSLGSMVSEIP	Liver;Liver	2009;2014	64;33
Reviewed	O60656	UGT1A9	UDP-glucuronosyltransferase 1-9	292	FEAYInASGEHGIVVF	IGGINCHQGKPLPMEFEAYINASGEHGIVVFSLGSMVSEIP	Liver	2014	33
Reviewed	O60656	UGT1A9	UDP-glucuronosyltransferase 1-9	292	EFEAYInASGEHGIVVF	IGGINCHQGKPLPMEFEAYINASGEHGIVVFSLGSMVSEIP	Liver	2014	33
Reviewed	O60656	UGT1A9	UDP-glucuronosyltransferase 1-9	292	InASGEHGIVVFSLGSMVSEIPEKK	IGGINCHQGKPLPMEFEAYINASGEHGIVVFSLGSMVSEIP	Liver	2014	33
Reviewed	O60656	UGT1A9	UDP-glucuronosyltransferase 1-9	292	AYInASGEHGIVVFSLGSMVSEIPEK	IGGINCHQGKPLPMEFEAYINASGEHGIVVFSLGSMVSEIP	Liver	2014	33
Reviewed	O60656	UGT1A9	UDP-glucuronosyltransferase 1-9	292	AYInASGEHGIVVFSLGSMVSEIPEKK	IGGINCHQGKPLPMEFEAYINASGEHGIVVFSLGSMVSEIP	Liver	2014	33
Reviewed	O60656	UGT1A9	UDP-glucuronosyltransferase 1-9	344	nNTILVK	GKIPQTVLWRYTGTRPSNLANNTILVKWLPQNDLLGHPMTR	Liver	2014	33
Reviewed	O60656	UGT1A9	UDP-glucuronosyltransferase 1-9	344	AnNTILVK	GKIPQTVLWRYTGTRPSNLANNTILVKWLPQNDLLGHPMTR	Liver	2014	33
Reviewed	O60656	UGT1A9	UDP-glucuronosyltransferase 1-9	344	NLAnNTIL	GKIPQTVLWRYTGTRPSNLANNTILVKWLPQNDLLGHPMTR	Liver	2014	33
Reviewed	O60656	UGT1A9	UDP-glucuronosyltransferase 1-9	344	AnNTILVKW	GKIPQTVLWRYTGTRPSNLANNTILVKWLPQNDLLGHPMTR	Liver	2014	33
Reviewed	O60656	UGT1A9	UDP-glucuronosyltransferase 1-9	344	LAnNTILVK	GKIPQTVLWRYTGTRPSNLANNTILVKWLPQNDLLGHPMTR	IGROV-1/CP cell line (Ovarian cancer)IGROV-1/CP;Liver	2007;2014	75;33
Reviewed	O60656	UGT1A9	UDP-glucuronosyltransferase 1-9	344	NLAnNTILVK	GKIPQTVLWRYTGTRPSNLANNTILVKWLPQNDLLGHPMTR	Liver	2014	33
Reviewed	O60656	UGT1A9	UDP-glucuronosyltransferase 1-9	344	PSNLAnNTIL	GKIPQTVLWRYTGTRPSNLANNTILVKWLPQNDLLGHPMTR	Liver	2014	33
[truncated: 36,669 more rows]

## Sheet: References
The references for human glycoprotein and glycosite database
1	Sun S, Shah P, Eshghi ST, Yang W, Trikannad N, Yang S, Chen L, Aiyetan P, Hoti N, Zhang Z, et al: Comprehensive analysis of protein glycosylation by solid-phase extraction of N-linked glycans and glycosite-containing peptides. Nat Biotech 2015, advance online publication.
2	Shah P, Wang X, Yang W, Eshghi ST, Sun S, Hoti N, Chen L, Yang S, Pasay J, Rubin A: Integrated Proteomic and Glycoproteomic Analyses of Prostate Cancer Cells Reveal Glycoprotein Alteration in Protein Abundance and Glycosylation. Molecular & Cellular Proteomics 2015, 14:2753-2763.
3	Tian Y, Almaraz RT, Choi CH, Li QK, Saeui C, Li D, Shah P, Bhattacharya R, Yarema KJ, Zhang H: Identification of sialylated glycoproteins from metabolically oligosaccharide engineered pancreatic cells. Clinical proteomics 2015, 12:11.
4	Cheow ESH, Sim KH, de Kleijn D, Lee CN, Sorokin V, Sze SK: Simultaneous Enrichment of Plasma Soluble and Extracellular Vesicular Glycoproteins Using Prolonged Ultracentrifugation-Electrostatic Repulsion-hydrophilic Interaction Chromatography (PUC-ERLIC) Approach. Molecular & Cellular Proteomics 2015, 14:1657-1671.
5	Goyallon A, Cholet S, Chapelle M, Junot C, Fenaille F: Evaluation of a combined glycomics and glycoproteomics approach for studying the major glycoproteins present in biofluids: Application to cerebrospinal fluid. Rapid Communications in Mass Spectrometry 2015, 29:461-473.
6	Kim DS, Hahn Y: The acquisition of novel N-glycosylation sites in conserved proteins during human evolution. Bmc Bioinformatics 2015, 16.
7	Li Y, Shah P, De Marzo AM, Van Eyk JE, Lo Q, Chan DW, Zhang H: Identification of Glycoproteins Containing Specific Glycans Using a Lectin-Chemical Method. Analytical Chemistry 2015, 87:4683-4687.
8	Ma C, Zhang Q, Qu JY, Zhao XY, Li X, Liu YP, Wang PG: A precise approach in large scale core-fucosylated glycoprotein identification with low- and high-normalized collision energy. Journal of Proteomics 2015, 114:61-70.
9	Smeekens JM, Chen WX, Wu RH: Mass Spectrometric Analysis of the Cell Surface N-Glycoproteome by Combining Metabolic Labeling and Click Chemistry. Journal of the American Society for Mass Spectrometry 2015, 26:604-614.
10	Tan ZJ, Yin HD, Nie S, Lin ZX, Zhu JH, Ruffin MT, Anderson MA, Simone DM, Lubman DM: Large-Scale Identification of Core-Fucosylated Glycopeptide Sites in Pancreatic Cancer Serum Using Mass Spectrometry. Journal of Proteome Research 2015, 14:1968-1978.
11	Wang M, Zhang X, Deng C: Facile synthesis of magnetic poly(styrene-co-4-vinylbenzene-boronic acid) microspheres for selective enrichment of glycopeptides. Proteomics 2015, 15:2158-2165.
12	Weng Y, Sui Z, Jiang H, Shan Y, Chen L, Zhang S, Zhang L, Zhang Y: Releasing N-glycan from Peptide N-terminus by N-terminal Succinylation Assisted Enzymatic Deglycosylation. Scientific Reports 2015, 5.
13	Yang W, Laeyendecker O, Wendel SK, Zhang B, Sun S, Zhou J-Y, Ao M, Moore RD, Jackson JB, Zhang H: Glycoproteomic Study Reveals Altered Plasma Proteins Associated with HIV Elite Suppressors. Theranostics 2014, 4:1153.
14	Liu Y, Chen J, Sethi A, Li QK, Chen L, Collins B, Gillet LC, Wollscheid B, Zhang H, Aebersold R: Glycoproteomic analysis of prostate cancer tissues by SWATH mass spectrometry discovers N-acylethanolamine acid amidase and protein tyrosine kinase 7 as signatures for tumor aggressiveness. Molecular & Cellular Proteomics 2014, 13:1753-1768.
15	Chen R, Seebun D, Ye M, Zou H, Figeys D: Site-specific characterization of cell membrane N-glycosylation with integrated hydrophilic interaction chromatography solid phase extraction and LC-MS/MS. Journal of Proteomics 2014, 103:194-203.
16	Deeb SJ, Cox J, Schmidt-Supprian M, Mann M: N-linked Glycosylation Enrichment for In-depth Cell Surface Proteomics of Diffuse Large B-cell Lymphoma Subtypes. Molecular & Cellular Proteomics 2014, 13:240-251.
17	Fang C, Xiong Z, Qin H, Huang G, Liu J, Ye M, Feng S, Zou H: One-pot synthesis of magnetic colloidal nanocrystal clusters coated with chitosan for selective enrichment of glycopeptides. Analytica Chimica Acta 2014, 841:99-105.
18	Hirao Y, Matsuzaki H, Iwaki J, Kuno A, Kaji H, Ohkura T, Togayachi A, Abe M, Nomura M, Noguchi M, et al: Glycoproteomics Approach for Identifying Glycobiomarker Candidate Molecules for Tissue Type Classification of Non-small Cell Lung Carcinoma. Journal of Proteome Research 2014, 13:4705-4716.
19	Huang G, Sun Z, Qin H, Zhao L, Xiong Z, Peng X, Ou J, Zou H: Preparation of hydrazine functionalized polymer brushes hybrid magnetic nanoparticles for highly specific enrichment of glycopeptides. Analyst 2014, 139:2199-2206.
20	Kim JY, Oh D, Kim S-K, Kang D, Moon MH: Isotope-Coded Carbamidomethylation for Quantification of N-Glycoproteins with Online Microbore Hollow Fiber Enzyme Reactor-Nanoflow Liquid Chromatography-Tandem Mass Spectrometry. Analytical Chemistry 2014, 86:7650-7657.
21	Liu L, Yu M, Zhang Y, Wang C, Lu H: Hydrazide Functionalized Core-Shell Magnetic Nanocomposites for Highly Specific Enrichment of N-Glycopeptides. Acs Applied Materials & Interfaces 2014, 6:7823-7832.
22	Nicastri A, Gaspari M, Sacco R, Elia L, Gabriele C, Romano R, Rizzuto A, Cuda G: N-Glycoprotein Analysis Discovers New Up-Regulated Glycoproteins in Colorectal Cancer Tissue. Journal of Proteome Research 2014, 13:4932-4941.
23	Pan C, Zhou Y, Dator R, Ginghina C, Zhao Y, Movius J, Peskind E, Zabetian CP, Quinn J, Galasko D, et al: Targeted Discovery and Validation of Plasma Biomarkers of Parkinson's Disease. Journal of Proteome Research 2014, 13:4535-4545.
24	Song E, Zhu R, Hammond ZT, Mechref Y: LC-MS/MS Quantitation of Esophagus Disease Blood Serum Glycoproteins by Enrichment with Hydrazide Chemistry and Lectin Affinity Chromatography. Journal of Proteome Research 2014, 13:4808-4820.
25	Sun Z, Dong J, Zhang S, Hu Z, Cheng K, Li K, Xu B, Ye M, Nie Y, Fan D, Zou H: Identification of Chemoresistance-Related Cell-Surface Glycoproteins in Leukemia Cells and Functional Validation of Candidate Glycoproteins. Journal of Proteome Research 2014, 13:1593-1601.
26	Takakura D, Harazono A, Hashii N, Kawasaki N: Selective glycopeptide profiling by acetone enrichment and LC/MS. Journal of Proteomics 2014, 101:17-30.
27	Wang J, Zhou C, Zhang W, Yao J, Lu HJ, Dong QZ, Zhou HJ, Qin LX: An integrative strategy for quantitative analysis of the N-glycoproteome in complex biological samples. Proteome Science 2014, 12.
28	Wang Y, Liu M, Xie L, Fang C, Xiong H, Lu H: Highly Efficient Enrichment Method for Glycopeptide Analyses: Using Specific and Nonspecific Nanoparticles Synergistically. Analytical Chemistry 2014, 86:2057-2064.
29	Weng Y, Qu Y, Jiang H, Wu Q, Zhang L, Yuan H, Zhou Y, Zhang X, Zhang Y: An integrated sample pretreatment platform for quantitative N-glycoproteome analysis with combination of on-line glycopeptide enrichment, deglycosylation and dimethyl labeling. Analytica Chimica Acta 2014, 833:1-8.
30	Xu Y, Bailey U-M, Punyadeera C, Schulz BL: Identification of salivary N-glycoproteins and measurement of glycosylation site occupancy by boronate glycoprotein enrichment and liquid chromatography/electrospray ionization tandem mass spectrometry. Rapid Communications in Mass Spectrometry 2014, 28:471-482.
31	Zhang L, Jiang H, Yao J, Wang Y, Fang C, Yang P, Lu H: Highly specific enrichment of N-linked glycopeptides based on hydrazide functionalized soluble nanopolymers. Chemical Communications 2014, 50:1027-1029.
32	Zhang Z, Sun Z, Zhu J, Liu J, Huang G, Ye M, Zou H: High-Throughput Determination of the Site-Specific N-Sialoglycan Occupancy Rates by Differential Oxidation of Glycoproteins Followed with Quantitative Glycoproteomics Analysis. Analytical Chemistry 2014, 86:9830-9837.
33	Zhu J, Sun Z, Cheng K, Chen R, Ye M, Xu B, Sun D, Wang L, Liu J, Wang F, Zou H: Comprehensive Mapping of Protein N-Glycosylation in Human Liver by Combining Hydrophilic Interaction Chromatography and Hydrazide Chemistry. Journal of Proteome Research 2014, 13:1713-1721.
34	Sun S, Zhang B, Aiyetan P, Zhou J-Y, Shah P, Yang W, Levine DA, Zhang Z, Chan DW, Zhang H: Analysis of N-glycoproteins using Genomic N-glycosite Prediction. Journal of Proteome Research 2013, 12:5609-5615.
35	Chen J, Shah P, Zhang H: Solid phase extraction of N-linked glycopeptides using hydrazide tip. Analytical chemistry 2013, 85:10670-10674.
36	Li QK, Shah P, Li Y, Aiyetan PO, Chen J, Yung R, Molena D, Gabrielson E, Askin F, Chan DW: Glycoproteomic analysis of bronchoalveolar lavage (BAL) fluid identifies tumor-associated glycoproteins from lung adenocarcinoma. Journal of proteome research 2013, 12:3689-3696.
37	Boersema PJ, Geiger T, Wisniewski JR, Mann M: Quantification of the N-glycosylated Secretome by Super-SILAC During Breast Cancer Progression and in Human Blood Samples. Molecular & Cellular Proteomics 2013, 12:158-171.
38	Kaji H, Ocho M, Togayachi A, Kuno A, Sogabe M, Ohkura T, Nozaki H, Angata T, Chiba Y, Ozaki H, et al: Glycoproteomic Discovery of Serological Biomarker Candidates for HCV/HBV Infection-Associated Liver Fibrosis and Hepatocellular Carcinoma. Journal of Proteome Research 2013, 12:2630-2640.
39	Li QK, Shah P, Li Y, Aiyetan PO, Chen J, Yung R, Molena D, Gabrielson E, Askin F, Chan DW, Zhang H: Glycoproteomic Analysis of Bronchoalveolar Lavage (BAL) Fluid Identifies Tumor-Associated Glycoproteins from Lung Adenocarcinonna. Journal of Proteome Research 2013, 12:3689-3696.
40	Li X, Jiang J, Zhao X, Wang J, Han H, Zhao Y, Peng B, Zhong R, Ying W, Qian X: N-glycoproteome Analysis of the Secretome of Human Metastatic Hepatocellular Carcinoma Cell Lines Combining Hydrazide Chemistry, HILIC Enrichment and Mass Spectrometry. Plos One 2013, 8.
41	Liu Y, Huettenhain R, Surinova S, Gillet LCJ, Mouritsen J, Brunner R, Navarro P, Aebersold R: Quantitative measurements of N-linked glycoproteins in human plasma by SWATH-MS. Proteomics 2013, 13:1247-1256.
42	Ma C, Zhao X, Han H, Tong W, Zhang Q, Qin P, Chang C, Peng B, Ying W, Qian X: N-linked glycoproteome profiling of human serum using tandem enrichment and multiple fraction concatenation. Electrophoresis 2013, 34:2440-2450.
43	Wang GG, Wu YB, Zhou T, Guo YS, Zheng B, Wang J, Bi Y, Liu FJ, Zhou ZM, Guo XJ, Sha JH: Mapping of the N-Linked Glycoproteome of Human Spermatozoa. Journal of Proteome Research 2013, 12:5750-5759.
44	Yin X, Bern M, Xing Q, Ho J, Viner R, Mayr M: Glycoproteomic Analysis of the Secretome of Human Endothelial Cells. Molecular & Cellular Proteomics 2013, 12:956-978.
45	Zhou H, Froehlich JW, Briscoe AC, Lee RS: The GlycoFilter: A Simple and Comprehensive Sample Preparation Platform for Proteomics, N-Glycomics and Glycosylation Site Assignment. Molecular & Cellular Proteomics 2013, 12:2981-2991.
46	Tian Y, Esteva FJ, Song J, Zhang H: Altered expression of sialylated glycoproteins in breast cancer using hydrazide chemistry and mass spectrometry. Molecular & cellular proteomics 2012, 11:M111. 011403.
47	Almaraz RT, Tian Y, Bhattarcharya R, Tan E, Chen S-H, Dallas MR, Chen L, Zhang Z, Zhang H, Konstantopoulos K: Metabolic flux increases glycoprotein sialylation: implications for cell adhesion and cancer metastasis. Molecular & Cellular Proteomics 2012, 11:M112. 017558.
48	Danzer C, Eckhardt K, Schmidt A, Fankhauser N, Ribrioux S, Wollscheid B, Mueller L, Schiess R, Zuellig R, Lehmann R, et al: Comprehensive Description of the N-Glycoproteome of Mouse Pancreatic beta-Cells and Human Islets. Journal of Proteome Research 2012, 11:1598-1608.
49	Kim JY, Kim S-K, Kang D, Moon MH: Dual Lectin-Based Size Sorting Strategy to Enrich Targeted N-Glycopeptides by Asymmetrical Flow Field-Flow Fractionation: Profiling Lung Cancer Biomarkers. Analytical Chemistry 2012, 84:5343-5350.
50	Whitmore TE, Peterson A, Holzman T, Eastham A, Amon L, McIntosh M, Ozinsky A, Nelson PS, Martin DB: Integrative Analysis of N-Linked Human Glycoproteomic Data Sets Reveals PTPRF Ectodomain as a Novel Plasma Biomarker Candidate for Prostate Cancer. Journal of Proteome Research 2012, 11:2653-2665.
51	Yeh C-H, Chen S-H, Li D-T, Lin H-P, Huang H-J, Chang C-I, Shih W-L, Chern C-L, Shi F-K, Hsu J-L: Magnetic bead-based hydrophilic interaction liquid chromatography for glycopeptide enrichments. Journal of Chromatography A 2012, 1224:70-78.
52	Yen T-Y, Macher BA, McDonald CA, Alleyne-Chin C, Timpe LC: Glycoprotein Profiles of Human Breast Cells Demonstrate a Clear Clustering of Normal/Benign versus Malignant Cell Lines and Basal versus Luminal Cell Lines. Journal of Proteome Research 2012, 11:656-667.
53	Zhu J, Wang F, Chen R, Cheng K, Xu B, Guo Z, Liang X, Ye M, Zou H: Centrifugation Assisted Microreactor Enables Facile Integration of Trypsin Digestion, Hydrophilic Interaction Chromatography Enrichment, and On-Column Deglycosylation for Rapid and Sensitive N-Glycoproteome Analysis. Analytical Chemistry 2012, 84:5146-5153.
54	Tian Y, Yao Z, Roden R, Zhang H: Identification of glycoproteins associated with different histological subtypes of ovarian tumors using quantitative glycoproteomics. Proteomics 2011, 11:4677-4687.
55	Tian Y, Bova GS, Zhang H: Quantitative glycoproteomic analysis of optimal cutting temperature-embedded frozen tissues identifying glycoproteins associated with aggressive prostate cancer. Analytical chemistry 2011, 83:7013-7019.
56	Bandhakavi S, Van Riper SK, Tawfik PN, Stone MD, Haddad T, Rhodus NL, Carlis JV, Griffin TJ: Hexapeptide Libraries for Enhanced Protein PTM Identification and Relative Abundance Profiling in Whole Human Saliva. Journal of Proteome Research 2011, 10:1052-1061.
57	Chen Y, Cao J, Yan G, Lu H, Yang P: Two-step protease digestion and glycopeptide capture approach for accurate glycosite identification and glycoprotein sequence coverage improvement. Talanta 2011, 85:70-75.
58	Nagano K, Shinkawa T, Kato K, Inomata N, Yabuki N, Haramura M: Distinct cell surface proteome profiling by biotin labeling and glycoprotein capturing. Journal of Proteomics 2011, 74:1985-1993.
59	Lee H-J, Na K, Choi E-Y, Kim KS, Kim H, Paik Y-K: Simple Method for Quantitative Analysis of N-Linked Glycoproteins in Hepatocellular Carcinoma Specimens. Journal of Proteome Research 2010, 9:308-318.
60	Liu Z, Cao L, He Y, Qiao L, Xu C, Lu H, Yang P: Tandem O-18 Stable Isotope Labeling for Quantification of N-Glycoproteome. Journal of Proteome Research 2010, 9:227-236.
61	Zeng X, Hood BL, Sun M, Conrads TP, Day RS, Weissfeld JL, Siegfried JM, Bigbee WL: Lung Cancer Serum Biomarker Discovery Using Glycoprotein Capture and Liquid Chromatography Mass Spectrometry. Journal of Proteome Research 2010, 9:6440-6449.
62	Arcinas A, Yen T-Y, Kebebew E, Macher BA: Cell Surface and Secreted Protein Profiles of Human Thyroid Cancer Cell Lines Reveal Distinct Glycoprotein Patterns. Journal of Proteome Research 2009, 8:3958-3968.
63	Cao J, Shen C, Wang H, Shen H, Chen Y, Nie A, Yan G, Lu H, Liu Y, Yang P: Identification of N-Glycosylation Sites on Secreted Proteins of Human Hepatocellular Carcinoma Cells with a Complementary Proteomics Approach. Journal of Proteome Research 2009, 8:662-672.
64	Chen R, Jiang X, Sun D, Han G, Wang F, Ye M, Wang L, Zou H: Glycoproteomics analysis of human liver tissue by combination of multiple enzyme digestion and hydrazide chemistry. J Proteome Res 2009, 8:651-661.
65	Goo YA, Lilu AY, Ryu S, Shaffer SA, Malmstrom L, Page L, Nguyen LT, Doneanu CE, Goodlett DR: Identification of Secreted Glycoproteins of Human Prostate and Bladder Stromal Cells by Comparative Quantitative Proteomics. Prostate 2009, 69:49-61.
66	Jia W, Lu Z, Fu Y, Wang H-P, Wang L-H, Chi H, Yuan Z-F, Zheng Z-B, Song L-N, Han H-H, et al: A Strategy for Precise and Large Scale Identification of Core Fucosylated Glycoproteins. Molecular & Cellular Proteomics 2009, 8:913-923.
67	McDonald CA, Yang JY, Marathe V, Yen T-Y, Macher BA: Combining Results from Lectin Affinity Chromatography and Glycocapture Approaches Substantially Improves the Coverage of the Glycoproteome. Molecular & Cellular Proteomics 2009, 8:287-301.
68	Zhang L, Xu Y, Yao H, Xie L, Yao J, Lu H, Yang P: Boronic Acid Functionalized Core-Satellite Composite Nanoparticles for Advanced Enrichment of Glycopeptides and Glycoproteins. Chemistry-a European Journal 2009, 15:10158-10166.
69	Calvano CD, Zambonin CG, Jensen ON: Assessment of lectin and HILIC based enrichment protocols for characterization of serum glycoproteins by mass spectrometry. Journal of Proteomics 2008, 71:304-317.
70	Picariello G, Ferranti P, Mamone G, Roepstorff P, Addeo F: Identification of N-linked glycoproteins in human milk by hydrophilic interaction liquid chromatography and mass spectrometry. Proteomics 2008, 8:3833-3847.
71	Hagglund P, Matthiesen R, Elortza F, Hojrup P, Roepstorff P, Jensen ON, Bunkenborg J: An enzymatic deglycosylation scheme enabling identification of core fucosylated N-glycans and O-glycosylation site mapping of human plasma proteins. Journal of Proteome Research 2007, 6:3021-3031.
72	Hanson SR, Hsu T-L, Weerapana E, Kishikawa K, Simon GM, Cravatt BF, Wong C-H: Tailored glycoproteomics and glycan site mapping using saccharide-selective bioorthogonal probes. Journal of the American Chemical Society 2007, 129:7266-+.
73	Larsen MR, Jensen SS, Jakobsen LA, Heegaard NHH: Exploring the sialiome using titanium dioxide chromatography and mass spectrometry. Molecular & Cellular Proteomics 2007, 6:1778-1787.
74	Lewandrowski U, Zahedi RP, Moebius J, Walter U, Sickmann A: Enhanced N-glycosylation site analysis of Sialoglycopeptides by strong cation exchange prefractionation applied to platelet plasma membranes. Molecular & Cellular Proteomics 2007, 6:1933-1941.
75	Sun B, Ranish JA, Utleg AG, White JT, Yan X, Lin B, Hood L: Shotgun glycopeptide capture approach coupled with mass Spectrometry for comprehensive glycoproteomics. Molecular & Cellular Proteomics 2007, 6:141-149.
76	Alvarez-Manilla G, Atwood J, Guo Y, Warren NL, Orlando R, Pierce M: Tools for glycoproteomic analysis: Size exclusion chromatography facilitates identification of tryptic glycopeptides with N-linked glycosylation sites. Journal of Proteome Research 2006, 5:701-708.
77	Ramachandran P, Boontheung P, Xie YM, Sondej M, Wong DT, Loo JA: Identification of N-linked glycoproteins in human saliva by glycoprotein capture and mass spectrometry. Journal of Proteome Research 2006, 5:1493-1503.
78	Zhang H, Loriaux P, Eng J, Campbell D, Keller A, Moss P, Bonneau R, Zhang N, Zhou Y, Wollscheid B, et al: UniPep - a database for human N-linked glycosites: a resource for biomarker discovery. Genome Biology 2006, 7.
79	Qiu RQ, Regnier FE: Comparative glycoproteomics of N-linked complex-type glycoforms containing sialic acid in human serum. Analytical Chemistry 2005, 77:7225-7231.
80	Qiu RQ, Regnier FE: Use of multidimensional lectin affinity chromatography in differential glycoproteomics. Analytical Chemistry 2005, 77:2802-2809.
81	Liu T, Qian WJ, Gritsenko MA, Camp DG, Monroe ME, Moore RJ, Smith RD: Human plasma N-glycoproteome analysis by immunoaffinity subtraction, hydrazide chemistry, and mass spectrometry. Journal of Proteome Research 2005, 4:2070-2080.
82	Hagglund P, Bunkenborg J, Elortza F, Jensen ON, Roepstorff P: A new strategy for identification of N-glycosylated proteins and unambiguous assignment of their glycosylation sites using HILIC enrichment and partial deglycosylation. Journal of Proteome Research 2004, 3:556-566.
83	Zhang H, Li XJ, Martin DB, Aebersold R: Identification and quantification of N-linked glycoproteins using hydrazide chemistry, stable isotope labeling and mass spectrometry. Nature Biotechnology 2003, 21:660-666.
